# Supplementary material
Source: publisher figshare collection journal article supplement (https://karger.figshare.com/ndownloader/files/10596202)
Supplement: Supplementary file 1 [file 10596202]

## Sheet: Supplemental Table 1
Probeset ID	Gene Symbol	Gene Title	RefSeq Transcript ID	p-value(Treatment)	bonferroni(p-value(Treatment))	stepup(p-value(Treatment))	p-value(AHA vs. VEH)	bonferroni(p-value(AHA vs. VEH))	stepup(p-value(AHA vs. VEH))	Ratio(AHA vs. VEH)	Fold-Change(AHA vs. VEH)	Fold-Change(AHA vs. VEH) (Description)	p-value(AOL vs. VEH)	bonferroni(p-value(AOL vs. VEH))	stepup(p-value(AOL vs. VEH))	Ratio(AOL vs. VEH)	Fold-Change(AOL vs. VEH)	Fold-Change(AOL vs. VEH) (Description)	p-value(HAL vs. VEH)	bonferroni(p-value(HAL vs. VEH))	stepup(p-value(HAL vs. VEH))	Ratio(HAL vs. VEH)	Fold-Change(HAL vs. VEH)	Fold-Change(HAL vs. VEH) (Description)	p-value(OLZ vs. VEH)	bonferroni(p-value(OLZ vs. VEH))	stepup(p-value(OLZ vs. VEH))	Ratio(OLZ vs. VEH)	Fold-Change(OLZ vs. VEH)	Fold-Change(OLZ vs. VEH) (Description)	p-value(PCP+OLZ vs. PCP)	bonferroni(p-value(PCP+OLZ vs. PCP))	stepup(p-value(PCP+OLZ vs. PCP))	Ratio(PCP+OLZ vs. PCP)	Fold-Change(PCP+OLZ vs. PCP)	Fold-Change(PCP+OLZ vs. PCP) (Description)	p-value(PCP vs. VEH)	bonferroni(p-value(PCP vs. VEH))	stepup(p-value(PCP vs. VEH))	Ratio(PCP vs. VEH)	Fold-Change(PCP vs. VEH)	Fold-Change(PCP vs. VEH) (Description)
37710_at	MEF2C	myocyte enhancer factor 2C	NM_001131005 /// NM_002397	3.53136e-07	0.00259943	0.00259943	0.151008	1	0.999954	0.90538	-1.10451	AHA down vs VEH	0.000355647	1	0.65448	0.759407	-1.31682	AOL down vs VEH	0.992477	1	0.993827	0.999357	-1.00064	HAL down vs VEH	0.000161841	1	0.595657	1.32836	1.32836	OLZ up vs VEH	0.425412	1	0.999678	1.05922	1.05922	PCP+OLZ up vs PCP	0.54661	1	0.999419	0.958167	-1.04366	PCP down vs VEH
1916_s_at	FOS	FBJ murine osteosarcoma viral oncogene homolog	NM_005252	6.15816e-06	0.0453302	0.0223678	0.0783917	1	0.999954	1.16464	1.16464	AHA up vs VEH	7.06651e-05	0.520166	0.260083	0.677909	-1.47513	AOL down vs VEH	0.1899	1	0.514474	1.11903	1.11903	HAL up vs VEH	0.15474	1	0.999992	1.13013	1.13013	OLZ up vs VEH	0.129312	1	0.999678	1.14745	1.14745	PCP+OLZ up vs PCP	0.13847	1	0.999419	0.876282	-1.14119	PCP down vs VEH
31841_at	CTNNA2	catenin (cadherin-associated protein), alpha 2	NM_004389	1.31659e-05	0.0969144	0.0223678	0.000535279	1	0.999954	1.26561	1.26561	AHA up vs VEH	0.0168357	1	0.81859	1.1748	1.1748	AOL up vs VEH	5.42296e-07	0.00399184	0.00399184	1.45442	1.45442	HAL up vs VEH	3.90727e-05	0.287614	0.287614	1.33606	1.33606	OLZ up vs VEH	0.113519	1	0.999678	0.899235	-1.11206	PCP+OLZ down vs PCP	0.00422051	1	0.941429	1.21696	1.21696	PCP up vs VEH
38291_at	PENK	proenkephalin	NM_001135690 /// NM_006211	1.47808e-05	0.108802	0.0223678	0.0776939	1	0.999954	1.10453	1.10453	AHA up vs VEH	0.781584	1	0.915683	1.01597	1.01597	AOL up vs VEH	0.002307	1	0.514474	1.19619	1.19619	HAL up vs VEH	0.137795	1	0.999992	0.92024	-1.08667	OLZ down vs VEH	0.670398	1	0.999678	1.02507	1.02507	PCP+OLZ up vs PCP	0.0427089	1	0.999419	0.887734	-1.12646	PCP down vs VEH
35670_at	ATP1A3	ATPase, Na+/K+ transporting, alpha 3 polypeptide	NM_152296	1.51935e-05	0.111839	0.0223678	0.103057	1	0.999954	0.916943	-1.09058	AHA down vs VEH	1.06727e-05	0.0785618	0.0785618	0.761645	-1.31295	AOL down vs VEH	0.898197	1	0.920583	1.00671	1.00671	HAL up vs VEH	0.266844	1	0.999992	0.94318	-1.06024	OLZ down vs VEH	0.000545407	1	0.507066	1.22921	1.22921	PCP+OLZ up vs PCP	0.000804747	1	0.455672	0.822184	-1.21627	PCP down vs VEH
36161_at	AP2B1	adaptor-related protein complex 2, beta 1 subunit	NM_001030006 /// NM_001282	2.36511e-05	0.174096	0.029016	0.00563383	1	0.999954	1.16949	1.16949	AHA up vs VEH	0.0180322	1	0.81859	0.872465	-1.14618	AOL down vs VEH	0.00151361	1	0.514474	1.20009	1.20009	HAL up vs VEH	0.347811	1	0.999992	1.05202	1.05202	OLZ up vs VEH	0.165083	1	0.999678	1.08275	1.08275	PCP+OLZ up vs PCP	0.460214	1	0.999419	0.959614	-1.04209	PCP down vs VEH
31809_at	CNTN1	Contactin 1	NM_001843 /// NM_175038	4.38133e-05	0.322509	0.0448172	0.00200841	1	0.999954	0.808022	-1.23759	AHA down vs VEH	0.115537	1	0.81859	0.898463	-1.11301	AOL down vs VEH	0.780713	1	0.830581	1.01818	1.01818	HAL up vs VEH	0.003556	1	0.999992	0.818962	-1.22106	OLZ down vs VEH	0.000647486	1	0.507066	1.28589	1.28589	PCP+OLZ up vs PCP	2.22449e-05	0.163745	0.0818724	0.724891	-1.37952	PCP down vs VEH
280_g_at	NR4A1	nuclear receptor subfamily 4, group A, member 1	NM_002135 /// NM_173157	5.04981e-05	0.371716	0.0448172	0.307716	1	0.999954	1.07275	1.07275	AHA up vs VEH	0.000636567	1	0.762918	0.769813	-1.29902	AOL down vs VEH	0.547106	1	0.659769	1.04213	1.04213	HAL up vs VEH	0.130345	1	0.999992	1.11073	1.11073	OLZ up vs VEH	0.0789704	1	0.999678	1.13779	1.13779	PCP+OLZ up vs PCP	0.012758	1	0.999419	0.832027	-1.20188	PCP down vs VEH
36471_f_at	DTNA	dystrobrevin, alpha	NM_001128175 /// NM_001390 /// NM_001391 /// NM_001392 /// NM_032975 /// NM_0329	6.60545e-05	0.486227	0.0448172	0.40982	1	0.999954	1.04809	1.04809	AHA up vs VEH	0.0159942	1	0.81859	0.863264	-1.15839	AOL down vs VEH	0.12654	1	0.514474	0.91572	-1.09204	HAL down vs VEH	0.016838	1	0.999992	0.868556	-1.15134	OLZ down vs VEH	0.13953	1	0.999678	0.914342	-1.09368	PCP+OLZ down vs PCP	0.00770545	1	0.999419	0.84851	-1.17854	PCP down vs VEH
34091_s_at	VIM	vimentin	NM_003380	6.82885e-05	0.502672	0.0448172	0.222666	1	0.999954	0.92649	-1.07934	AHA down vs VEH	0.111013	1	0.81859	0.901259	-1.10956	AOL down vs VEH	0.257673	1	0.520268	1.07334	1.07334	HAL up vs VEH	0.0478029	1	0.999992	0.881653	-1.13423	OLZ down vs VEH	0.736515	1	0.999678	1.02222	1.02222	PCP+OLZ up vs PCP	0.000402405	1	0.313388	0.780751	-1.28082	PCP down vs VEH
40978_s_at	CDR1	cerebellar degeneration-related protein 1, 34kDa	NM_004065	7.11593e-05	0.523803	0.0448172	0.0528569	1	0.999954	0.868642	-1.15122	AHA down vs VEH	0.00804725	1	0.81859	0.815527	-1.2262	AOL down vs VEH	0.0138487	1	0.514474	1.19943	1.19943	HAL up vs VEH	0.186198	1	0.999992	0.909496	-1.09951	OLZ down vs VEH	0.0559073	1	0.999678	1.15756	1.15756	PCP+OLZ up vs PCP	0.0256238	1	0.999419	0.844042	-1.18478	PCP down vs VEH
41193_at	DUSP6	dual specificity phosphatase 6	NM_001946 /// NM_022652	7.31978e-05	0.538809	0.0448172	0.316136	1	0.999954	1.06706	1.06706	AHA up vs VEH	0.000306208	1	0.65448	0.769038	-1.30033	AOL down vs VEH	0.273209	1	0.525108	1.07362	1.07362	HAL up vs VEH	0.211406	1	0.999992	1.08461	1.08461	OLZ up vs VEH	0.973467	1	0.999678	0.99775	-1.00225	PCP+OLZ down vs PCP	0.21747	1	0.999419	1.08654	1.08654	PCP up vs VEH
37253_at	PIP5K1B	phosphatidylinositol-4-phosphate 5-kinase, type I, beta	NM_003558	7.91501e-05	0.582624	0.0448172	0.7396	1	0.999954	0.979635	-1.02079	AHA down vs VEH	0.00224596	1	0.81859	0.811933	-1.23163	AOL down vs VEH	0.0191069	1	0.514474	1.16232	1.16232	HAL up vs VEH	0.501359	1	0.999992	0.959144	-1.0426	OLZ down vs VEH	0.458727	1	0.999678	1.04962	1.04962	PCP+OLZ up vs PCP	0.0255473	1	0.999419	0.862482	-1.15944	PCP down vs VEH
871_s_at	HLF	hepatic leukemia factor	NM_002126	0.000103124	0.759094	0.0540483	0.545935	1	0.999954	0.95766	-1.04421	AHA down vs VEH	0.012244	1	0.81859	0.824291	-1.21316	AOL down vs VEH	0.0566658	1	0.514474	1.14978	1.14978	HAL up vs VEH	0.431626	1	0.999992	1.05806	1.05806	OLZ up vs VEH	0.617977	1	0.999678	0.963109	-1.0383	PCP+OLZ down vs PCP	0.0432836	1	0.999419	0.857479	-1.16621	PCP down vs VEH
2049_s_at	JUNB	jun B proto-oncogene	NM_002229	0.000110138	0.810724	0.0540483	0.443678	1	0.999954	1.04887	1.04887	AHA up vs VEH	0.00118239	1	0.81859	0.799626	-1.25058	AOL down vs VEH	0.190282	1	0.514474	1.08567	1.08567	HAL up vs VEH	0.630296	1	0.999992	0.970535	-1.03036	OLZ down vs VEH	0.0256456	1	0.999678	1.16268	1.16268	PCP+OLZ up vs PCP	0.00298509	1	0.732442	0.816639	-1.22453	PCP down vs VEH
AFFX-HSAC07/X00351_5_at	ACTB	actin, beta	NM_001101	0.000279239	1	0.128468	0.525781	1	0.999954	0.966017	-1.03518	AHA down vs VEH	0.593275	1	0.854284	0.970361	-1.03054	AOL down vs VEH	0.622135	1	0.70803	1.02719	1.02719	HAL up vs VEH	0.222493	1	0.999992	0.935232	-1.06925	OLZ down vs VEH	3.28283e-06	0.0241649	0.0241649	1.36277	1.36277	PCP+OLZ up vs PCP	0.000447146	1	0.313388	0.806569	-1.23982	PCP down vs VEH
41194_at	SRP14	signal recognition particle 14kDa (homologous Alu RNA binding protein)	NM_003134	0.000303359	1	0.131244	0.171961	1	0.999954	1.09498	1.09498	AHA up vs VEH	0.166089	1	0.81859	0.909178	-1.0999	AOL down vs VEH	0.00202375	1	0.514474	1.24117	1.24117	HAL up vs VEH	0.0696573	1	0.999992	1.12939	1.12939	OLZ up vs VEH	0.0472159	1	0.999678	1.15113	1.15113	PCP+OLZ up vs PCP	0.120665	1	0.999419	0.898367	-1.11313	PCP down vs VEH
36470_s_at	DTNA	dystrobrevin, alpha	NM_001128175 /// NM_001390 /// NM_001391 /// NM_001392 /// NM_032975 /// NM_0329	0.000320932	1	0.131244	0.821641	1	0.999954	1.01447	1.01447	AHA up vs VEH	0.0149141	1	0.81859	0.846217	-1.18173	AOL down vs VEH	0.0460189	1	0.514474	0.877621	-1.13944	HAL down vs VEH	0.0249652	1	0.999992	0.862668	-1.1592	OLZ down vs VEH	0.663478	1	0.999678	0.971204	-1.02965	PCP+OLZ down vs PCP	0.00107721	1	0.481517	0.792942	-1.26113	PCP down vs VEH
1290_g_at	GSTM5	glutathione S-transferase mu 5	NM_000851	0.000358669	1	0.137905	0.238281	1	0.999954	0.931916	-1.07306	AHA down vs VEH	0.00402742	1	0.81859	0.829924	-1.20493	AOL down vs VEH	0.0283108	1	0.514474	1.1436	1.1436	HAL up vs VEH	0.367143	1	0.999992	1.05518	1.05518	OLZ up vs VEH	0.260635	1	0.999678	1.07332	1.07332	PCP+OLZ up vs PCP	0.236343	1	0.999419	0.929284	-1.0761	PCP down vs VEH
39531_at	MAP1B	microtubule-associated protein 1B	NM_005909	0.000374692	1	0.137905	0.0218489	1	0.999954	0.851232	-1.17477	AHA down vs VEH	0.835587	1	0.935366	0.985543	-1.01467	AOL down vs VEH	0.558892	1	0.667966	0.961058	-1.04052	HAL down vs VEH	0.0960229	1	0.999992	0.891395	-1.12184	OLZ down vs VEH	0.000388095	1	0.507066	1.3179	1.3179	PCP+OLZ up vs PCP	2.08506e-05	0.153481	0.0818724	0.712674	-1.40317	PCP down vs VEH
32786_at	JUNB	jun B proto-oncogene	NM_002229	0.000420795	1	0.147499	0.369965	1	0.999954	1.065	1.065	AHA up vs VEH	0.00130088	1	0.81859	0.77928	-1.28323	AOL down vs VEH	0.282526	1	0.528348	1.0786	1.0786	HAL up vs VEH	0.673138	1	0.999992	1.02995	1.02995	OLZ up vs VEH	0.0659613	1	0.999678	1.14838	1.14838	PCP+OLZ up vs PCP	0.0227936	1	0.999419	0.84315	-1.18603	PCP down vs VEH
36175_s_at	HIVEP2	human immunodeficiency virus type I enhancer binding protein 2	NM_006734	0.000445697	1	0.149126	0.446887	1	0.999954	0.950494	-1.05208	AHA down vs VEH	0.00155923	1	0.81859	0.792194	-1.26232	AOL down vs VEH	0.255754	1	0.519234	1.07921	1.07921	HAL up vs VEH	0.0797367	1	0.999992	1.1263	1.1263	OLZ up vs VEH	0.736953	1	0.999678	1.02381	1.02381	PCP+OLZ up vs PCP	0.297	1	0.999419	0.930206	-1.07503	PCP down vs VEH
41741_at	RBM3	RNA binding motif (RNP1, RRM) protein 3	NM_006743	0.000490099	1	0.151183	0.884824	1	0.999954	1.00792	1.00792	AHA up vs VEH	0.563778	1	0.840984	0.967932	-1.03313	AOL down vs VEH	0.00374825	1	0.514474	1.18186	1.18186	HAL up vs VEH	0.00186219	1	0.999992	1.19835	1.19835	OLZ up vs VEH	0.446995	1	0.999678	1.04474	1.04474	PCP+OLZ up vs PCP	0.614625	1	0.999419	0.971955	-1.02885	PCP down vs VEH
498_at	TAX1BP1	Tax1 (human T-cell leukemia virus type I) binding protein 1	NM_001079864 /// NM_006024	0.00049292	1	0.151183	0.768165	1	0.999954	0.978861	-1.0216	AHA down vs VEH	0.00319012	1	0.81859	0.791033	-1.26417	AOL down vs VEH	0.0405343	1	0.514474	1.16488	1.16488	HAL up vs VEH	0.427588	1	0.999992	1.05941	1.05941	OLZ up vs VEH	0.297424	1	0.999678	1.08334	1.08334	PCP+OLZ up vs PCP	0.108249	1	0.999419	0.884614	-1.13044	PCP down vs VEH
1421_at	CAMK4	calcium/calmodulin-dependent protein kinase IV	NM_001744	0.00056091	1	0.160999	0.188352	1	0.999954	0.897078	-1.11473	AHA down vs VEH	0.145959	1	0.81859	0.882922	-1.1326	AOL down vs VEH	0.0791832	1	0.514474	1.1575	1.1575	HAL up vs VEH	0.294393	1	0.999992	1.09003	1.09003	OLZ up vs VEH	0.172527	1	0.999678	1.12602	1.12602	PCP+OLZ up vs PCP	0.00720516	1	0.999419	0.787792	-1.26937	PCP down vs VEH
33514_at	CAMK4	calcium/calmodulin-dependent protein kinase IV	NM_001744	0.00056867	1	0.160999	0.54793	1	0.999954	1.03806	1.03806	AHA up vs VEH	0.427466	1	0.819966	0.950153	-1.05246	AOL down vs VEH	0.00422113	1	0.514474	1.20631	1.20631	HAL up vs VEH	0.0599396	1	0.999992	1.12691	1.12691	OLZ up vs VEH	0.14507	1	0.999678	1.10132	1.10132	PCP+OLZ up vs PCP	0.0704195	1	0.999419	0.887989	-1.12614	PCP down vs VEH
40375_at	EGR3	early growth response 3	NM_004430	0.000618641	1	0.16866	0.282632	1	0.999954	1.07813	1.07813	AHA up vs VEH	0.0202882	1	0.81859	0.841146	-1.18885	AOL down vs VEH	0.206544	1	0.514474	1.09275	1.09275	HAL up vs VEH	0.307295	1	0.999992	1.07404	1.07404	OLZ up vs VEH	0.272085	1	0.999678	1.08435	1.08435	PCP+OLZ up vs PCP	0.0184925	1	0.999419	0.83865	-1.19239	PCP down vs VEH
31801_at	TMF1	TATA element modulatory factor 1	NM_007114	0.000718108	1	0.188786	0.00550153	1	0.999954	1.16648	1.16648	AHA up vs VEH	0.516785	1	0.827594	1.03605	1.03605	AOL up vs VEH	0.000795209	1	0.514474	1.21009	1.21009	HAL up vs VEH	0.00777175	1	0.999992	1.15838	1.15838	OLZ up vs VEH	0.0135272	1	0.999678	0.867064	-1.15332	PCP+OLZ down vs PCP	0.0266798	1	0.999419	1.13305	1.13305	PCP up vs VEH
208_at	CTNNA2	catenin (cadherin-associated protein), alpha 2	NM_004389	0.000752085	1	0.1909	0.0713588	1	0.999954	1.14201	1.14201	AHA up vs VEH	0.467743	1	0.821908	1.05583	1.05583	AOL up vs VEH	0.000359795	1	0.514474	1.32375	1.32375	HAL up vs VEH	0.00239281	1	0.999992	1.2623	1.2623	OLZ up vs VEH	0.880016	1	0.999678	0.988612	-1.01152	PCP+OLZ down vs PCP	0.823586	1	0.999419	1.01678	1.01678	PCP up vs VEH
38374_at	KLF10	Kruppel-like factor 10	NM_001032282 /// NM_005655	0.000786541	1	0.192991	0.19582	1	0.999954	1.10732	1.10732	AHA up vs VEH	0.0231602	1	0.81859	0.827325	-1.20871	AOL down vs VEH	0.122938	1	0.514474	1.12992	1.12992	HAL up vs VEH	0.170115	1	0.999992	1.11435	1.11435	OLZ up vs VEH	0.623114	1	0.999678	1.04122	1.04122	PCP+OLZ up vs PCP	0.0980105	1	0.999419	0.872817	-1.14572	PCP down vs VEH
34272_at	RGS4	regulator of G-protein signaling 4	NM_001102445 /// NM_001113380 /// NM_001113381 /// NM_005613	0.000948722	1	0.225276	0.0187144	1	0.999954	0.865688	-1.15515	AHA down vs VEH	0.586539	1	0.85158	0.967228	-1.03388	AOL down vs VEH	0.384498	1	0.566058	0.949654	-1.05302	HAL down vs VEH	0.0573395	1	0.999992	0.891284	-1.12198	OLZ down vs VEH	0.00010189	0.750009	0.250003	1.30768	1.30768	PCP+OLZ up vs PCP	0.000149664	1	0.27542	0.774011	-1.29197	PCP down vs VEH
38407_r_at	PTGDS	prostaglandin D2 synthase 21kDa (brain)	NM_000954	0.00100025	1	0.228756	0.337058	1	0.999954	1.05535	1.05535	AHA up vs VEH	0.26424	1	0.81859	1.06711	1.06711	AOL up vs VEH	0.0497685	1	0.514474	1.11883	1.11883	HAL up vs VEH	0.260362	1	0.999992	1.06535	1.06535	OLZ up vs VEH	0.802379	1	0.999678	0.985406	-1.01481	PCP+OLZ down vs PCP	0.0913075	1	0.999419	0.905362	-1.10453	PCP down vs VEH
37040_at	GANAB	glucosidase, alpha; neutral AB	NM_198334 /// NM_198335	0.00106783	1	0.228756	0.0135922	1	0.999954	1.1374	1.1374	AHA up vs VEH	0.0788747	1	0.81859	0.911257	-1.09739	AOL down vs VEH	0.233961	1	0.516024	1.06201	1.06201	HAL up vs VEH	0.0398163	1	0.999992	1.1117	1.1117	OLZ up vs VEH	0.160311	1	0.999678	0.927748	-1.07788	PCP+OLZ down vs PCP	0.554968	1	0.999419	1.03116	1.03116	PCP up vs VEH
40289_at	NAPG	N-ethylmaleimide-sensitive factor attachment protein, gamma	NM_003826	0.00107254	1	0.228756	0.445414	1	0.999954	0.951762	-1.05068	AHA down vs VEH	0.0584632	1	0.81859	0.87861	-1.13816	AOL down vs VEH	0.0724542	1	0.514474	1.12576	1.12576	HAL up vs VEH	0.102636	1	0.999992	1.1132	1.1132	OLZ up vs VEH	0.012072	1	0.999678	1.19478	1.19478	PCP+OLZ up vs PCP	0.0359788	1	0.999419	0.86555	-1.15534	PCP down vs VEH
40096_at	ATP5A1	ATP synthase, H+ transporting, mitochondrial F1 complex, alpha subunit 1, cardia	NM_001001937 /// NM_004046	0.00108769	1	0.228756	0.433996	1	0.999954	0.954286	-1.0479	AHA down vs VEH	0.0670577	1	0.81859	1.12234	1.12234	AOL up vs VEH	0.156561	1	0.514474	1.08929	1.08929	HAL up vs VEH	0.249374	1	0.999992	0.933121	-1.07167	OLZ down vs VEH	0.00147717	1	0.822424	1.23806	1.23806	PCP+OLZ up vs PCP	0.0174592	1	0.999419	0.858709	-1.16454	PCP down vs VEH
37712_g_at	MEF2C	myocyte enhancer factor 2C	NM_001131005 /// NM_002397	0.00113531	1	0.232138	0.00205409	1	0.999954	0.816721	-1.22441	AHA down vs VEH	0.0317683	1	0.81859	0.868393	-1.15155	AOL down vs VEH	0.425466	1	0.583164	0.951909	-1.05052	HAL down vs VEH	0.935275	1	0.999992	1.00501	1.00501	OLZ up vs VEH	0.00466797	1	0.999678	1.21365	1.21365	PCP+OLZ up vs PCP	0.00116439	1	0.481517	0.800482	-1.24925	PCP down vs VEH
37053_at	ATP2B2	ATPase, Ca++ transporting, plasma membrane 2	NM_001001331 /// NM_001683	0.00122346	1	0.243402	0.442808	1	0.999954	0.957515	-1.04437	AHA down vs VEH	0.383798	1	0.819004	0.950252	-1.05235	AOL down vs VEH	0.556382	1	0.666372	1.03378	1.03378	HAL up vs VEH	0.992349	1	0.999992	0.99946	-1.00054	OLZ down vs VEH	0.000626726	1	0.507066	1.24573	1.24573	PCP+OLZ up vs PCP	0.000139435	1	0.27542	0.782248	-1.27837	PCP down vs VEH
1686_g_at	RAB4A /// SPHAR	RAB4A, member RAS oncogene family /// S-phase response (cyclin related)	NM_004578 /// NM_006542	0.001386	1	0.262184	0.438599	1	0.999954	1.04768	1.04768	AHA up vs VEH	0.274817	1	0.81859	0.934063	-1.07059	AOL down vs VEH	0.00829065	1	0.514474	1.18027	1.18027	HAL up vs VEH	0.581082	1	0.999992	1.03367	1.03367	OLZ up vs VEH	0.280372	1	0.999678	0.933696	-1.07101	PCP+OLZ down vs PCP	0.498934	1	0.999419	0.958797	-1.04297	PCP down vs VEH
38484_at	SNAP25	synaptosomal-associated protein, 25kDa	NM_003081 /// NM_130811	0.0013891	1	0.262184	0.768691	1	0.999954	0.981075	-1.01929	AHA down vs VEH	0.0118944	1	0.81859	0.838342	-1.19283	AOL down vs VEH	0.173727	1	0.514474	1.09354	1.09354	HAL up vs VEH	0.843817	1	0.999992	1.01288	1.01288	OLZ up vs VEH	0.0177213	1	0.999678	1.18337	1.18337	PCP+OLZ up vs PCP	0.00457232	1	0.989908	0.817608	-1.22308	PCP down vs VEH
38825_at	FGA	fibrinogen alpha chain	NM_000508 /// NM_021871	0.00154619	1	0.284538	0.132766	1	0.999954	1.10207	1.10207	AHA up vs VEH	0.465217	1	0.821908	0.952861	-1.04947	AOL down vs VEH	0.0263065	1	0.514474	1.15749	1.15749	HAL up vs VEH	0.727053	1	0.999992	0.977999	-1.0225	OLZ down vs VEH	0.000936109	1	0.574225	0.787378	-1.27004	PCP+OLZ down vs PCP	0.0210278	1	0.999419	1.17088	1.17088	PCP up vs VEH
34265_at	SCG5	secretogranin V (7B2 protein)	NM_001144757 /// NM_003020	0.00164919	1	0.288024	0.122889	1	0.999954	1.08324	1.08324	AHA up vs VEH	0.139377	1	0.81859	0.923899	-1.08237	AOL down vs VEH	0.00400517	1	0.514474	1.16796	1.16796	HAL up vs VEH	0.0583536	1	0.999992	1.10397	1.10397	OLZ up vs VEH	0.0964899	1	0.999678	0.913083	-1.09519	PCP+OLZ down vs PCP	0.0388165	1	0.999419	1.11888	1.11888	PCP up vs VEH
36307_at	ARC	activity-regulated cytoskeleton-associated protein	NM_015193	0.00168537	1	0.288024	0.142625	1	0.999954	1.08473	1.08473	AHA up vs VEH	0.0121637	1	0.81859	0.86243	-1.15951	AOL down vs VEH	0.217721	1	0.514474	1.07046	1.07046	HAL up vs VEH	0.30928	1	0.999992	1.05758	1.05758	OLZ up vs VEH	0.0430668	1	0.999678	1.12718	1.12718	PCP+OLZ up vs PCP	0.0784015	1	0.999419	0.903229	-1.10714	PCP down vs VEH
281_s_at	PPP3CA	protein phosphatase 3 (formerly 2B), catalytic subunit, alpha isoform	NM_000944 /// NM_001130691 /// NM_001130692	0.00171595	1	0.288024	0.163888	1	0.999954	0.907059	-1.10246	AHA down vs VEH	0.00410926	1	0.81859	0.804821	-1.24251	AOL down vs VEH	0.760244	1	0.813631	0.9791	-1.02135	HAL down vs VEH	0.122967	1	0.999992	1.1145	1.1145	OLZ up vs VEH	0.120746	1	0.999678	1.12169	1.12169	PCP+OLZ up vs PCP	0.0347798	1	0.999419	0.855708	-1.16862	PCP down vs VEH
AFFX-HUMGAPDH/M33197_5_at	GAPDH	glyceraldehyde-3-phosphate dehydrogenase	NM_002046	0.00172165	1	0.288024	0.781987	1	0.999954	1.01625	1.01625	AHA up vs VEH	0.875811	1	0.953984	0.990631	-1.00946	AOL down vs VEH	0.0883078	1	0.514474	1.10646	1.10646	HAL up vs VEH	0.897314	1	0.999992	1.00754	1.00754	OLZ up vs VEH	6.21735e-05	0.457659	0.228829	1.3153	1.3153	PCP+OLZ up vs PCP	0.00521909	1	0.999419	0.837332	-1.19427	PCP down vs VEH
41308_at	CTBP1	C-terminal binding protein 1	NM_001012614 /// NM_001328	0.002056	1	0.330479	0.0136061	1	0.999954	0.841046	-1.189	AHA down vs VEH	0.00320107	1	0.81859	0.80428	-1.24335	AOL down vs VEH	0.599308	1	0.693306	1.03608	1.03608	HAL up vs VEH	0.156779	1	0.999992	0.907891	-1.10145	OLZ down vs VEH	0.0270533	1	0.999678	1.17581	1.17581	PCP+OLZ up vs PCP	0.00586104	1	0.999419	0.816854	-1.22421	PCP down vs VEH
41260_at	DDX17	DEAD (Asp-Glu-Ala-Asp) box polypeptide 17	NM_001098504 /// NM_001098505 /// NM_006386 /// NM_030881	0.00210858	1	0.330479	0.994879	1	0.999954	0.999667	-1.00033	AHA down vs VEH	0.00286139	1	0.81859	0.843503	-1.18553	AOL down vs VEH	0.124139	1	0.514474	1.08451	1.08451	HAL up vs VEH	0.688315	1	0.999992	1.02107	1.02107	OLZ up vs VEH	0.679182	1	0.999678	1.0229	1.0229	PCP+OLZ up vs PCP	0.170721	1	0.999419	0.928102	-1.07747	PCP down vs VEH
890_at	UBE2A	ubiquitin-conjugating enzyme E2A (RAD6 homolog)	NM_003336 /// NM_181762 /// NM_181777	0.00214126	1	0.330479	0.324535	1	0.999954	1.05786	1.05786	AHA up vs VEH	0.151691	1	0.81859	0.918241	-1.08904	AOL down vs VEH	0.00529348	1	0.514474	1.18143	1.18143	HAL up vs VEH	0.41561	1	0.999992	1.04747	1.04747	OLZ up vs VEH	0.680734	1	0.999678	0.975699	-1.02491	PCP+OLZ down vs PCP	0.591072	1	0.999419	0.968867	-1.03213	PCP down vs VEH
1915_s_at	FOS	FBJ murine osteosarcoma viral oncogene homolog	NM_005252	0.00215501	1	0.330479	0.105127	1	0.999954	1.11432	1.11432	AHA up vs VEH	0.00399109	1	0.81859	0.8132	-1.22971	AOL down vs VEH	0.259403	1	0.520268	1.07751	1.07751	HAL up vs VEH	0.672359	1	0.999992	1.02818	1.02818	OLZ up vs VEH	0.334774	1	0.999678	1.06937	1.06937	PCP+OLZ up vs PCP	0.385926	1	0.999419	0.942482	-1.06103	PCP down vs VEH
33668_at	RPL12	ribosomal protein L12	NM_000976	0.00242079	1	0.360661	0.0188698	1	0.999954	1.11061	1.11061	AHA up vs VEH	0.766487	1	0.91252	0.986853	-1.01332	AOL down vs VEH	0.0010116	1	0.514474	1.16453	1.16453	HAL up vs VEH	0.17713	1	0.999992	1.06058	1.06058	OLZ up vs VEH	0.180431	1	0.999678	1.06337	1.06337	PCP+OLZ up vs PCP	0.588286	1	0.999419	0.976106	-1.02448	PCP down vs VEH
39099_at	SEC23A	Sec23 homolog A (S. cerevisiae)	NM_006364	0.0024771	1	0.360661	0.368575	1	0.999954	0.937444	-1.06673	AHA down vs VEH	0.0229089	1	0.81859	0.840175	-1.19023	AOL down vs VEH	0.0713015	1	0.514474	1.14079	1.14079	HAL up vs VEH	0.63052	1	0.999992	1.03502	1.03502	OLZ up vs VEH	0.769756	1	0.999678	1.02228	1.02228	PCP+OLZ up vs PCP	0.0865536	1	0.999419	0.878652	-1.13811	PCP down vs VEH
41579_s_at	PRKCI	protein kinase C, iota	NM_002740	0.00249881	1	0.360661	0.0762459	1	0.999954	1.10928	1.10928	AHA up vs VEH	0.138705	1	0.81859	0.914809	-1.09312	AOL down vs VEH	0.539014	1	0.654409	1.03591	1.03591	HAL up vs VEH	0.0214196	1	0.999992	0.872362	-1.14631	OLZ down vs VEH	0.171013	1	0.999678	0.919801	-1.08719	PCP+OLZ down vs PCP	0.764055	1	0.999419	1.01798	1.01798	PCP up vs VEH
41090_s_at	ATP2B2	ATPase, Ca++ transporting, plasma membrane 2	NM_001001331 /// NM_001683	0.00255535	1	0.36173	0.0592574	1	0.999954	0.873872	-1.14433	AHA down vs VEH	0.287535	1	0.81859	0.925544	-1.08045	AOL down vs VEH	0.526631	1	0.645765	1.0453	1.0453	HAL up vs VEH	0.285875	1	0.999992	0.927698	-1.07794	OLZ down vs VEH	0.0108355	1	0.999678	1.21604	1.21604	PCP+OLZ up vs PCP	0.000336368	1	0.309501	0.753519	-1.32711	PCP down vs VEH
36130_f_at	MT1E	metallothionein 1E	NM_175617	0.00266874	1	0.370653	0.0499999	1	0.999954	1.11088	1.11088	AHA up vs VEH	0.202305	1	0.81859	1.07221	1.07221	AOL up vs VEH	0.00141509	1	0.514474	1.19584	1.19584	HAL up vs VEH	0.562714	1	0.999992	1.0308	1.0308	OLZ up vs VEH	0.0291079	1	0.999678	1.13205	1.13205	PCP+OLZ up vs PCP	0.222913	1	0.999419	0.935509	-1.06894	PCP down vs VEH
41237_at	HLA-A	major histocompatibility complex, class I, A	NM_002116	0.0030111	1	0.410458	0.854178	1	0.999954	1.01256	1.01256	AHA up vs VEH	0.612064	1	0.857529	0.964958	-1.03631	AOL down vs VEH	0.158348	1	0.514474	1.10189	1.10189	HAL up vs VEH	0.659267	1	0.999992	1.03042	1.03042	OLZ up vs VEH	0.217309	1	0.999678	0.914792	-1.09314	PCP+OLZ down vs PCP	0.139224	1	0.999419	0.899894	-1.11124	PCP down vs VEH
35633_at	ELMO1	engulfment and cell motility 1	NM_001039459 /// NM_014800 /// NM_130442	0.00311923	1	0.417225	0.685805	1	0.999954	1.02401	1.02401	AHA up vs VEH	0.163053	1	0.81859	0.917908	-1.08943	AOL down vs VEH	0.00729686	1	0.514474	1.17943	1.17943	HAL up vs VEH	0.730103	1	0.999992	1.02043	1.02043	OLZ up vs VEH	0.0317185	1	0.999678	1.14645	1.14645	PCP+OLZ up vs PCP	0.11049	1	0.999419	0.906181	-1.10353	PCP down vs VEH
1192_at	PSMD12	proteasome (prosome, macropain) 26S subunit, non-ATPase, 12	NM_002816 /// NM_174871	0.00320571	1	0.417225	0.548977	1	0.999954	1.03853	1.03853	AHA up vs VEH	0.251844	1	0.81859	0.927505	-1.07816	AOL down vs VEH	0.00305348	1	0.514474	1.21876	1.21876	HAL up vs VEH	0.347813	1	0.999992	1.06123	1.06123	OLZ up vs VEH	0.917955	1	0.999678	0.993198	-1.00685	PCP+OLZ down vs PCP	0.595239	1	0.999419	0.965904	-1.0353	PCP down vs VEH
1269_at	PIK3R1	phosphoinositide-3-kinase, regulatory subunit 1 (alpha)	NM_181504 /// NM_181523 /// NM_181524	0.00323079	1	0.417225	0.426979	1	0.999954	0.955268	-1.04683	AHA down vs VEH	0.0681254	1	0.81859	0.895199	-1.11707	AOL down vs VEH	0.554631	1	0.665033	1.03456	1.03456	HAL up vs VEH	0.847157	1	0.999992	0.989001	-1.01112	OLZ down vs VEH	0.00293722	1	0.999678	1.21015	1.21015	PCP+OLZ up vs PCP	0.000500493	1	0.313388	0.798805	-1.25187	PCP down vs VEH
32655_s_at	BRD8	bromodomain containing 8	NM_001164326 /// NM_006696 /// NM_139199 /// NM_183359	0.00332644	1	0.422172	0.404587	1	0.999954	0.937919	-1.06619	AHA down vs VEH	0.00347642	1	0.81859	0.782556	-1.27786	AOL down vs VEH	0.577615	1	0.678882	1.04364	1.04364	HAL up vs VEH	0.19565	1	0.999992	1.10535	1.10535	OLZ up vs VEH	0.205089	1	0.999678	0.901928	-1.10874	PCP+OLZ down vs PCP	0.478423	1	0.999419	1.05801	1.05801	PCP up vs VEH
35279_at	TAX1BP1	Tax1 (human T-cell leukemia virus type I) binding protein 1	NM_001079864 /// NM_006024	0.00351074	1	0.43746	0.787959	1	0.999954	1.01561	1.01561	AHA up vs VEH	0.010898	1	0.81859	0.853553	-1.17157	AOL down vs VEH	0.0371904	1	0.514474	1.13139	1.13139	HAL up vs VEH	0.586003	1	0.999992	1.0319	1.0319	OLZ up vs VEH	0.805654	1	0.999678	1.01502	1.01502	PCP+OLZ up vs PCP	0.463746	1	0.999419	0.95712	-1.0448	PCP down vs VEH
41136_s_at	APP	amyloid beta (A4) precursor protein	NM_000484 /// NM_001136016 /// NM_001136129 /// NM_001136130 /// NM_001136131 //	0.00360784	1	0.43746	0.884126	1	0.999954	1.00724	1.00724	AHA up vs VEH	0.0305919	1	0.81859	0.892054	-1.12101	AOL down vs VEH	0.0996917	1	0.514474	1.08649	1.08649	HAL up vs VEH	0.351375	1	0.999992	1.04747	1.04747	OLZ up vs VEH	0.107472	1	0.999678	1.08907	1.08907	PCP+OLZ up vs PCP	0.0382048	1	0.999419	0.896433	-1.11553	PCP down vs VEH
37016_at	ECHS1	enoyl Coenzyme A hydratase, short chain, 1, mitochondrial	NM_004092	0.0036252	1	0.43746	0.0933172	1	0.999954	1.104	1.104	AHA up vs VEH	0.508936	1	0.827359	0.961124	-1.04045	AOL down vs VEH	0.00927467	1	0.514474	1.17066	1.17066	HAL up vs VEH	0.102723	1	0.999992	1.10088	1.10088	OLZ up vs VEH	0.947907	1	0.999678	1.00399	1.00399	PCP+OLZ up vs PCP	0.450076	1	0.999419	0.955582	-1.04648	PCP down vs VEH
35748_at	EEF1B2	eukaryotic translation elongation factor 1 beta 2	NM_001037663 /// NM_001959 /// NM_021121	0.00375815	1	0.443456	0.341925	1	0.999954	1.05238	1.05238	AHA up vs VEH	0.22683	1	0.81859	0.934804	-1.06974	AOL down vs VEH	0.0485865	1	0.514474	1.11415	1.11415	HAL up vs VEH	0.475921	1	0.999992	1.03893	1.03893	OLZ up vs VEH	0.120484	1	0.999678	1.09276	1.09276	PCP+OLZ up vs PCP	0.0276963	1	0.999419	0.8818	-1.13404	PCP down vs VEH
279_at	NR4A1	nuclear receptor subfamily 4, group A, member 1	NM_002135 /// NM_173157	0.00379538	1	0.443456	0.950583	1	0.999954	0.995897	-1.00412	AHA down vs VEH	0.000725503	1	0.762918	0.7782	-1.28502	AOL down vs VEH	0.694752	1	0.764778	1.0264	1.0264	HAL up vs VEH	0.784948	1	0.999992	1.01828	1.01828	OLZ up vs VEH	0.840454	1	0.999678	1.01416	1.01416	PCP+OLZ up vs PCP	0.159595	1	0.999419	0.906712	-1.10289	PCP down vs VEH
33804_at	PTK2B	PTK2B protein tyrosine kinase 2 beta	NM_004103 /// NM_173174 /// NM_173175 /// NM_173176	0.00395274	1	0.448245	0.31322	1	0.999954	1.04865	1.04865	AHA up vs VEH	0.0260527	1	0.81859	0.89461	-1.11781	AOL down vs VEH	0.0224888	1	0.514474	1.11692	1.11692	HAL up vs VEH	0.666261	1	0.999992	1.02041	1.02041	OLZ up vs VEH	0.145679	1	0.999678	1.0754	1.0754	PCP+OLZ up vs PCP	0.822835	1	0.999419	0.989205	-1.01091	PCP down vs VEH
38174_at	PSD	pleckstrin and Sec7 domain containing	NM_002779	0.00395815	1	0.448245	0.022188	1	0.999954	1.12539	1.12539	AHA up vs VEH	0.342322	1	0.81859	0.951913	-1.05052	AOL down vs VEH	0.0054366	1	0.514474	1.15726	1.15726	HAL up vs VEH	0.0913022	1	0.999992	1.08961	1.08961	OLZ up vs VEH	0.567331	1	0.999678	1.03055	1.03055	PCP+OLZ up vs PCP	0.823078	1	0.999419	0.988515	-1.01162	PCP down vs VEH
706_at	NR3C1	nuclear receptor subfamily 3, group C, member 1 (glucocorticoid receptor)	NM_000176 /// NM_001018074 /// NM_001018075 /// NM_001018076 /// NM_001018077 //	0.00414745	1	0.462356	0.456094	1	0.999954	0.959117	-1.04263	AHA down vs VEH	0.064463	1	0.81859	0.896537	-1.1154	AOL down vs VEH	0.0189463	1	0.514474	1.14555	1.14555	HAL up vs VEH	0.452748	1	0.999992	0.958817	-1.04295	OLZ down vs VEH	0.489248	1	0.999678	1.0416	1.0416	PCP+OLZ up vs PCP	0.180854	1	0.999419	0.924716	-1.08141	PCP down vs VEH
33249_at	NR3C2	nuclear receptor subfamily 3, group C, member 2	NM_000901	0.00420837	1	0.462356	0.800561	1	0.999954	1.01472	1.01472	AHA up vs VEH	0.127645	1	0.81859	0.911607	-1.09696	AOL down vs VEH	0.0243079	1	0.514474	1.14422	1.14422	HAL up vs VEH	0.537138	1	0.999992	0.964862	-1.03642	OLZ down vs VEH	0.0982994	1	0.999678	1.10792	1.10792	PCP+OLZ up vs PCP	0.0457214	1	0.999419	0.884365	-1.13075	PCP down vs VEH
39605_at	FOXG1	forkhead box G1	NM_005249	0.00456713	1	0.494392	0.474968	1	0.999954	1.04241	1.04241	AHA up vs VEH	0.0168339	1	0.81859	0.861649	-1.16057	AOL down vs VEH	0.0449008	1	0.514474	1.1268	1.1268	HAL up vs VEH	0.883024	1	0.999992	0.99151	-1.00856	OLZ down vs VEH	0.246539	1	0.999678	1.07393	1.07393	PCP+OLZ up vs PCP	0.221086	1	0.999419	0.928513	-1.07699	PCP down vs VEH
36610_at	R3HDM1	R3H domain containing 1	NM_015361	0.00470377	1	0.501804	0.80378	1	0.999954	1.01716	1.01716	AHA up vs VEH	0.10612	1	0.81859	0.89007	-1.12351	AOL down vs VEH	0.121441	1	0.514474	1.11375	1.11375	HAL up vs VEH	0.1574	1	0.999992	1.10306	1.10306	OLZ up vs VEH	0.517748	1	0.999678	1.04786	1.04786	PCP+OLZ up vs PCP	0.0712693	1	0.999419	0.877476	-1.13963	PCP down vs VEH
1463_at	PTPN12	protein tyrosine phosphatase, non-receptor type 12	NM_001131008 /// NM_001131009 /// NM_002835	0.00487881	1	0.507046	0.366797	1	0.999954	0.932188	-1.07274	AHA down vs VEH	0.0372713	1	0.81859	0.842247	-1.1873	AOL down vs VEH	0.663759	1	0.740629	1.03426	1.03426	HAL up vs VEH	0.725489	1	0.999992	0.973171	-1.02757	OLZ down vs VEH	0.221249	1	0.999678	1.1059	1.1059	PCP+OLZ up vs PCP	0.00166621	1	0.533261	0.76375	-1.30933	PCP down vs VEH
1430_at	SST	somatostatin	NM_001048	0.00489068	1	0.507046	0.0557468	1	0.999954	1.11123	1.11123	AHA up vs VEH	0.781969	1	0.915827	1.01553	1.01553	AOL up vs VEH	0.000986408	1	0.514474	1.21023	1.21023	HAL up vs VEH	0.273141	1	0.999992	1.06122	1.06122	OLZ up vs VEH	0.187487	1	0.999678	1.07844	1.07844	PCP+OLZ up vs PCP	0.0590915	1	0.999419	1.11372	1.11372	PCP up vs VEH
36151_at	PLD3	phospholipase D family, member 3	NM_001031696 /// NM_012268	0.00497684	1	0.508813	0.897778	1	0.999954	1.00801	1.00801	AHA up vs VEH	0.0586229	1	0.81859	0.882936	-1.13258	AOL down vs VEH	0.214467	1	0.514474	1.08104	1.08104	HAL up vs VEH	0.420782	1	0.999992	1.05152	1.05152	OLZ up vs VEH	0.0064803	1	0.999678	1.20591	1.20591	PCP+OLZ up vs PCP	0.0109709	1	0.999419	0.84283	-1.18648	PCP down vs VEH
33925_at	NRGN	neurogranin (protein kinase C substrate, RC3)	NM_001126181 /// NM_006176	0.00505069	1	0.50929	0.00201868	1	0.999954	1.18186	1.18186	AHA up vs VEH	0.733559	1	0.901978	1.01804	1.01804	AOL up vs VEH	0.00152673	1	0.514474	1.18785	1.18785	HAL up vs VEH	0.00348535	1	0.999992	1.17001	1.17001	OLZ up vs VEH	0.60963	1	0.999678	0.973052	-1.02769	PCP+OLZ down vs PCP	0.0682934	1	0.999419	1.1029	1.1029	PCP up vs VEH
428_s_at	B2M	beta-2-microglobulin	NM_004048	0.00519629	1	0.516891	0.520126	1	0.999954	0.960472	-1.04115	AHA down vs VEH	0.983451	1	0.993682	1.00134	1.00134	AOL up vs VEH	0.442418	1	0.593735	1.0494	1.0494	HAL up vs VEH	0.0195674	1	0.999992	0.859465	-1.16351	OLZ down vs VEH	0.589589	1	0.999678	1.03623	1.03623	PCP+OLZ up vs PCP	0.0130457	1	0.999419	0.84568	-1.18248	PCP down vs VEH
37669_s_at	ATP1B1	ATPase, Na+/K+ transporting, beta 1 polypeptide	NM_001001787 /// NM_001677	0.00531203	1	0.521358	0.630147	1	0.999954	0.973861	-1.02684	AHA down vs VEH	0.0035151	1	0.81859	0.838873	-1.19208	AOL down vs VEH	0.115553	1	0.514474	1.09185	1.09185	HAL up vs VEH	0.607073	1	0.999992	0.972103	-1.0287	OLZ down vs VEH	0.385019	1	0.999678	1.05178	1.05178	PCP+OLZ up vs PCP	0.339178	1	0.999419	0.946767	-1.05623	PCP down vs VEH
41215_s_at	ID2 /// ID2B	inhibitor of DNA binding 2, dominant negative helix-loop-helix protein /// inhib	NM_002166 /// NR_026582	0.00543015	1	0.525939	0.701145	1	0.999954	1.02177	1.02177	AHA up vs VEH	0.0814788	1	0.81859	0.902024	-1.10862	AOL down vs VEH	0.0949267	1	0.514474	1.10007	1.10007	HAL up vs VEH	0.834461	1	0.999992	1.01179	1.01179	OLZ up vs VEH	0.0170542	1	0.999678	1.15754	1.15754	PCP+OLZ up vs PCP	0.0145815	1	0.999419	0.862741	-1.1591	PCP down vs VEH
33414_at	NOMO1 /// NOMO2 /// NOMO3	NODAL modulator 1 /// NODAL modulator 2 /// NODAL modulator 3	NM_001004060 /// NM_001004067 /// NM_014287 /// NM_173614	0.00555452	1	0.530997	0.618722	1	0.999954	0.973532	-1.02719	AHA down vs VEH	0.0334745	1	0.81859	0.885122	-1.12979	AOL down vs VEH	0.243551	1	0.516948	1.06537	1.06537	HAL up vs VEH	0.456245	1	0.999992	1.04106	1.04106	OLZ up vs VEH	0.0169352	1	0.999678	1.15096	1.15096	PCP+OLZ up vs PCP	0.0134462	1	0.999419	0.866274	-1.15437	PCP down vs VEH
33274_f_at	IGL@	immunoglobulin lambda locus	---	0.00576634	1	0.54418	0.0304773	1	0.999954	1.14048	1.14048	AHA up vs VEH	0.032997	1	0.81859	0.874698	-1.14325	AOL down vs VEH	0.402885	1	0.574415	1.05071	1.05071	HAL up vs VEH	0.506713	1	0.999992	0.961559	-1.03998	OLZ down vs VEH	0.656922	1	0.999678	1.02795	1.02795	PCP+OLZ up vs PCP	0.481362	1	0.999419	0.957842	-1.04401	PCP down vs VEH
2050_s_at	RAC1	ras-related C3 botulinum toxin substrate 1 (rho family, small GTP binding protei	NM_006908 /// NM_018890	0.0059344	1	0.5506	0.161707	1	0.999954	1.09775	1.09775	AHA up vs VEH	0.254272	1	0.81859	0.924723	-1.0814	AOL down vs VEH	0.00437217	1	0.514474	1.21905	1.21905	HAL up vs VEH	0.0404192	1	0.999992	1.14874	1.14874	OLZ up vs VEH	0.1481	1	0.999678	1.10691	1.10691	PCP+OLZ up vs PCP	0.854308	1	0.999419	1.01259	1.01259	PCP up vs VEH
1484_at	CDH8	cadherin 8, type 2	NM_001796	0.00598397	1	0.5506	0.838325	1	0.999954	0.987323	-1.01284	AHA down vs VEH	0.0294672	1	0.81859	0.864708	-1.15646	AOL down vs VEH	0.0646854	1	0.514474	1.12542	1.12542	HAL up vs VEH	0.617481	1	0.999992	1.03177	1.03177	OLZ up vs VEH	0.280222	1	0.999678	0.930882	-1.07425	PCP+OLZ down vs PCP	0.657233	1	0.999419	0.971642	-1.02919	PCP down vs VEH
37191_at	PHYHIP	phytanoyl-CoA 2-hydroxylase interacting protein	NM_001099335 /// NM_014759	0.00655929	1	0.595952	0.184279	1	0.999954	1.06737	1.06737	AHA up vs VEH	0.0939005	1	0.81859	0.917863	-1.08949	AOL down vs VEH	0.411382	1	0.577756	1.04086	1.04086	HAL up vs VEH	0.0471466	1	0.999992	1.10398	1.10398	OLZ up vs VEH	0.916942	1	0.999678	0.994685	-1.00534	PCP+OLZ down vs PCP	0.387742	1	0.999419	0.957305	-1.0446	PCP down vs VEH
37984_s_at	ARF6	ADP-ribosylation factor 6	NM_001663	0.00663878	1	0.595952	0.5999	1	0.999954	0.967304	-1.0338	AHA down vs VEH	0.563293	1	0.840984	0.9628	-1.03864	AOL down vs VEH	0.0199766	1	0.514474	1.16492	1.16492	HAL up vs VEH	0.161581	1	0.999992	1.09386	1.09386	OLZ up vs VEH	0.799407	1	0.999678	1.01708	1.01708	PCP+OLZ up vs PCP	0.237183	1	0.999419	0.924804	-1.08131	PCP down vs VEH
40861_at	MORF4L2	mortality factor 4 like 2	NM_001142418 /// NM_001142419 /// NM_001142420 /// NM_001142421 /// NM_001142422	0.00672111	1	0.596073	0.730273	1	0.999954	0.97655	-1.02401	AHA down vs VEH	0.144494	1	0.81859	0.900037	-1.11107	AOL down vs VEH	0.0508752	1	0.514474	1.1477	1.1477	HAL up vs VEH	0.837034	1	0.999992	0.985949	-1.01425	OLZ down vs VEH	0.0334118	1	0.999678	1.17207	1.17207	PCP+OLZ up vs PCP	0.0196517	1	0.999419	0.841656	-1.18813	PCP down vs VEH
32289_at	PTPRS	protein tyrosine phosphatase, receptor type, S	NM_002850 /// NM_130853 /// NM_130854 /// NM_130855	0.00705298	1	0.611365	0.0225422	1	0.999954	0.867714	-1.15245	AHA down vs VEH	0.0202186	1	0.81859	0.861016	-1.16142	AOL down vs VEH	0.0880596	1	0.514474	0.900804	-1.11012	HAL down vs VEH	0.0267287	1	0.999992	0.871505	-1.14744	OLZ down vs VEH	0.00156418	1	0.822424	1.2387	1.2387	PCP+OLZ up vs PCP	0.000255332	1	0.309501	0.77934	-1.28314	PCP down vs VEH
34412_s_at	GP1BB /// SEPT5	glycoprotein Ib (platelet), beta polypeptide /// septin 5	NM_000407 /// NM_002688	0.00709016	1	0.611365	0.979205	1	0.999954	1.00161	1.00161	AHA up vs VEH	0.00743301	1	0.81859	0.835795	-1.19647	AOL down vs VEH	0.397494	1	0.572033	1.05386	1.05386	HAL up vs VEH	0.990968	1	0.999992	0.999302	-1.0007	OLZ down vs VEH	0.879627	1	0.999678	0.990208	-1.00989	PCP+OLZ down vs PCP	0.0910479	1	0.999419	0.89575	-1.11638	PCP down vs VEH
37286_at	NRCAM	neuronal cell adhesion molecule	NM_001037132 /// NM_001037133 /// NM_005010	0.00723856	1	0.611365	0.703836	1	0.999954	0.975003	-1.02564	AHA down vs VEH	0.0136392	1	0.81859	0.837879	-1.19349	AOL down vs VEH	0.234441	1	0.516024	1.08313	1.08313	HAL up vs VEH	0.209102	1	0.999992	1.08811	1.08811	OLZ up vs VEH	0.420368	1	0.999678	1.05832	1.05832	PCP+OLZ up vs PCP	0.165071	1	0.999419	0.907651	-1.10175	PCP down vs VEH
37025_at	LITAF	lipopolysaccharide-induced TNF factor	NM_001136472 /// NM_001136473 /// NM_004862 /// NR_024320	0.00727537	1	0.611365	0.0303017	1	0.999954	1.14355	1.14355	AHA up vs VEH	0.164666	1	0.81859	1.09131	1.09131	AOL up vs VEH	0.000372628	1	0.514474	1.26219	1.26219	HAL up vs VEH	0.0130298	1	0.999992	1.16802	1.16802	OLZ up vs VEH	0.408016	1	0.999678	0.948846	-1.05391	PCP+OLZ down vs PCP	0.201205	1	0.999419	1.08362	1.08362	PCP up vs VEH
39709_at	SEPW1	selenoprotein W, 1	NM_003009	0.00736011	1	0.611365	0.0596454	1	0.999954	1.11613	1.11613	AHA up vs VEH	0.147579	1	0.81859	0.917089	-1.09041	AOL down vs VEH	0.0417666	1	0.514474	1.12664	1.12664	HAL up vs VEH	0.160305	1	0.999992	1.08442	1.08442	OLZ up vs VEH	0.928014	1	0.999678	0.994596	-1.00543	PCP+OLZ down vs PCP	0.711147	1	0.999419	0.978368	-1.02211	PCP down vs VEH
34890_at	ATP6V1A	ATPase, H+ transporting, lysosomal 70kDa, V1 subunit A	NM_001690	0.00739187	1	0.611365	0.00956512	1	0.999954	0.829625	-1.20536	AHA down vs VEH	0.758674	1	0.909395	1.02215	1.02215	AOL up vs VEH	0.1216	1	0.514474	0.897294	-1.11446	HAL down vs VEH	0.0981798	1	0.999992	0.890448	-1.12303	OLZ down vs VEH	0.0218054	1	0.999678	1.18811	1.18811	PCP+OLZ up vs PCP	0.00141075	1	0.494502	0.78338	-1.27652	PCP down vs VEH
622_at	RAB6A	RAB6A, member RAS oncogene family	NM_002869 /// NM_198896	0.00758871	1	0.620672	0.325116	1	0.999954	0.938689	-1.06532	AHA down vs VEH	0.191151	1	0.81859	0.916319	-1.09132	AOL down vs VEH	0.358817	1	0.553795	1.06073	1.06073	HAL up vs VEH	0.376243	1	0.999992	0.94476	-1.05847	OLZ down vs VEH	0.00902954	1	0.999678	1.20188	1.20188	PCP+OLZ up vs PCP	0.001293	1	0.481517	0.795776	-1.25664	PCP down vs VEH
1460_g_at	PTPN4	protein tyrosine phosphatase, non-receptor type 4 (megakaryocyte)	NM_002830	0.00783593	1	0.63385	0.116042	1	0.999954	0.912912	-1.0954	AHA down vs VEH	0.000701764	1	0.762918	0.805551	-1.24139	AOL down vs VEH	0.390006	1	0.568854	0.951931	-1.0505	HAL down vs VEH	0.870556	1	0.999992	0.990749	-1.00934	OLZ down vs VEH	0.383505	1	0.999678	1.054	1.054	PCP+OLZ up vs PCP	0.0113733	1	0.999419	0.855477	-1.16894	PCP down vs VEH
34849_at	SARS	seryl-tRNA synthetase	NM_006513	0.00796686	1	0.634038	0.739329	1	0.999954	1.01822	1.01822	AHA up vs VEH	0.0385787	1	0.81859	0.887428	-1.12685	AOL down vs VEH	0.11904	1	0.514474	1.0897	1.0897	HAL up vs VEH	0.259766	1	0.999992	1.06356	1.06356	OLZ up vs VEH	0.0281928	1	0.999678	1.13815	1.13815	PCP+OLZ up vs PCP	0.105956	1	0.999419	0.911748	-1.09679	PCP down vs VEH
35905_s_at	GAPDH	glyceraldehyde-3-phosphate dehydrogenase	NM_002046	0.00801054	1	0.634038	0.0321655	1	0.999954	1.11083	1.11083	AHA up vs VEH	0.757005	1	0.908794	0.984878	-1.01535	AOL down vs VEH	0.000696961	1	0.514474	1.1906	1.1906	HAL up vs VEH	0.0925467	1	0.999992	1.08497	1.08497	OLZ up vs VEH	0.449498	1	0.999678	1.03875	1.03875	PCP+OLZ up vs PCP	0.189854	1	0.999419	1.06752	1.06752	PCP up vs VEH
224_at	KLF10	Kruppel-like factor 10	NM_001032282 /// NM_005655	0.00860142	1	0.665766	0.194849	1	0.999954	1.07976	1.07976	AHA up vs VEH	0.112568	1	0.81859	0.906895	-1.10266	AOL down vs VEH	0.0639502	1	0.514474	1.11735	1.11735	HAL up vs VEH	0.323239	1	0.999992	1.05993	1.05993	OLZ up vs VEH	0.896877	1	0.999678	1.00802	1.00802	PCP+OLZ up vs PCP	0.302428	1	0.999419	0.938973	-1.06499	PCP down vs VEH
37448_s_at	GNAS	GNAS complex locus	NM_000516 /// NM_001077488 /// NM_001077489 /// NM_001077490 /// NM_016592 /// N	0.00891201	1	0.665766	0.631307	1	0.999954	0.97715	-1.02338	AHA down vs VEH	0.0150246	1	0.81859	0.881687	-1.13419	AOL down vs VEH	0.270267	1	0.523915	1.05491	1.05491	HAL up vs VEH	0.824711	1	0.999992	1.01071	1.01071	OLZ up vs VEH	0.0155997	1	0.999678	1.13583	1.13583	PCP+OLZ up vs PCP	0.0360466	1	0.999419	0.898025	-1.11355	PCP down vs VEH
2060_at	BCL2	B-cell CLL/lymphoma 2	NM_000633 /// NM_000657	0.00899723	1	0.665766	0.381579	1	0.999954	1.04955	1.04955	AHA up vs VEH	0.179309	1	0.81859	0.925583	-1.0804	AOL down vs VEH	0.0143972	1	0.514474	1.15042	1.15042	HAL up vs VEH	0.817283	1	0.999992	1.01279	1.01279	OLZ up vs VEH	0.348383	1	0.999678	1.05613	1.05613	PCP+OLZ up vs PCP	0.218069	1	0.999419	0.931582	-1.07344	PCP down vs VEH
41759_at	SKP1	S-phase kinase-associated protein 1	NM_006930 /// NM_170679	0.00908956	1	0.665766	0.893803	1	0.999954	1.007	1.007	AHA up vs VEH	0.848104	1	0.941755	0.989698	-1.01041	AOL down vs VEH	0.0122474	1	0.514474	1.14628	1.14628	HAL up vs VEH	0.736014	1	0.999992	0.982528	-1.01778	OLZ down vs VEH	0.292405	1	0.999678	0.943329	-1.06008	PCP+OLZ down vs PCP	0.639028	1	0.999419	0.974902	-1.02574	PCP down vs VEH
37067_at	FAM155A	family with sequence similarity 155, member A	NM_001080396	0.00918832	1	0.665766	0.430919	1	0.999954	1.05197	1.05197	AHA up vs VEH	0.0805832	1	0.81859	0.888518	-1.12547	AOL down vs VEH	0.0345887	1	0.514474	1.14969	1.14969	HAL up vs VEH	0.162654	1	0.999992	1.09485	1.09485	OLZ up vs VEH	0.562885	1	0.999678	1.03988	1.03988	PCP+OLZ up vs PCP	0.411674	1	0.999419	0.946753	-1.05624	PCP down vs VEH
37157_at	CALB2	calbindin 2	NM_001740 /// NM_007087 /// NM_007088 /// NR_027910	0.00937309	1	0.665766	0.124293	1	0.999954	1.10033	1.10033	AHA up vs VEH	0.549305	1	0.835303	0.962691	-1.03875	AOL down vs VEH	0.00944372	1	0.514474	1.18095	1.18095	HAL up vs VEH	0.974977	1	0.999992	1.00192	1.00192	OLZ up vs VEH	0.604362	1	0.999678	0.967093	-1.03403	PCP+OLZ down vs PCP	0.761132	1	0.999419	0.980894	-1.01948	PCP down vs VEH
35746_r_at	PCBP2	poly(rC) binding protein 2	NM_001098620 /// NM_001128911 /// NM_001128912 /// NM_001128913 /// NM_001128914	0.00940476	1	0.665766	0.535148	1	0.999954	0.965959	-1.03524	AHA down vs VEH	0.0158225	1	0.81859	1.1556	1.1556	AOL up vs VEH	0.380223	1	0.563692	1.05036	1.05036	HAL up vs VEH	0.330732	1	0.999992	0.946937	-1.05604	OLZ down vs VEH	0.639374	1	0.999678	1.0279	1.0279	PCP+OLZ up vs PCP	0.211665	1	0.999419	0.929773	-1.07553	PCP down vs VEH
40203_at	EIF1	eukaryotic translation initiation factor 1	NM_005801	0.00945847	1	0.665766	0.352331	1	0.999954	0.932642	-1.07222	AHA down vs VEH	0.113347	1	0.81859	0.883223	-1.13222	AOL down vs VEH	0.404337	1	0.575091	1.06444	1.06444	HAL up vs VEH	0.0335042	1	0.999992	0.849278	-1.17747	OLZ down vs VEH	0.0331318	1	0.999678	1.18814	1.18814	PCP+OLZ up vs PCP	0.00497001	1	0.999419	0.795506	-1.25706	PCP down vs VEH
34297_at	GPR37	G protein-coupled receptor 37 (endothelin receptor type B-like)	NM_005302	0.00946635	1	0.665766	0.0491975	1	0.999954	0.87582	-1.14179	AHA down vs VEH	0.0070089	1	0.81859	0.824916	-1.21224	AOL down vs VEH	0.309462	1	0.536392	1.06953	1.06953	HAL up vs VEH	0.796194	1	0.999992	0.98317	-1.01712	OLZ down vs VEH	0.886646	1	0.999678	1.00991	1.00991	PCP+OLZ up vs PCP	0.223059	1	0.999419	0.919687	-1.08733	PCP down vs VEH
31901_at	KCNAB2	potassium voltage-gated channel, shaker-related subfamily, beta member 2	NM_003636 /// NM_172130	0.00966756	1	0.665766	0.294953	1	0.999954	0.944436	-1.05883	AHA down vs VEH	0.770492	1	0.912991	0.983769	-1.0165	AOL down vs VEH	0.142696	1	0.514474	1.08391	1.08391	HAL up vs VEH	0.65657	1	0.999992	0.976163	-1.02442	OLZ down vs VEH	0.0930086	1	0.999678	1.10258	1.10258	PCP+OLZ up vs PCP	0.00737955	1	0.999419	0.853987	-1.17098	PCP down vs VEH
37450_r_at	GNAS	GNAS complex locus	NM_000516 /// NM_001077488 /// NM_001077489 /// NM_001077490 /// NM_016592 /// N	0.00977221	1	0.665766	0.330218	1	0.999954	0.955194	-1.04691	AHA down vs VEH	0.0776512	1	0.81859	0.916491	-1.09112	AOL down vs VEH	0.160516	1	0.514474	1.06879	1.06879	HAL up vs VEH	0.604893	1	0.999992	1.02454	1.02454	OLZ up vs VEH	0.00697856	1	0.999678	1.1498	1.1498	PCP+OLZ up vs PCP	0.0973946	1	0.999419	0.921445	-1.08525	PCP down vs VEH
40482_s_at	C1orf61	chromosome 1 open reading frame 61	NM_006365	0.00977921	1	0.665766	0.1183	1	0.999954	1.09254	1.09254	AHA up vs VEH	0.0945625	1	0.81859	0.906432	-1.10323	AOL down vs VEH	0.0300859	1	0.514474	1.13291	1.13291	HAL up vs VEH	0.415405	1	0.999992	1.04666	1.04666	OLZ up vs VEH	0.855975	1	0.999678	1.01071	1.01071	PCP+OLZ up vs PCP	0.63698	1	0.999419	0.97308	-1.02766	PCP down vs VEH
32169_at	FBXO21	F-box protein 21	NM_015002 /// NM_033624	0.00980914	1	0.665766	0.362936	1	0.999954	0.952854	-1.04948	AHA down vs VEH	0.00897845	1	0.81859	0.861194	-1.16118	AOL down vs VEH	0.232611	1	0.516024	1.06568	1.06568	HAL up vs VEH	0.157002	1	0.999992	0.927079	-1.07866	OLZ down vs VEH	0.13351	1	0.999678	1.08834	1.08834	PCP+OLZ up vs PCP	0.0606138	1	0.999419	0.900288	-1.11076	PCP down vs VEH
39076_s_at	DRAP1	DR1-associated protein 1 (negative cofactor 2 alpha)	NM_006442	0.00985534	1	0.665766	0.541571	1	0.999954	1.037	1.037	AHA up vs VEH	0.0493233	1	0.81859	0.883439	-1.13194	AOL down vs VEH	0.155125	1	0.514474	1.08933	1.08933	HAL up vs VEH	0.417837	1	0.999992	1.0495	1.0495	OLZ up vs VEH	0.0234174	1	0.999678	1.15798	1.15798	PCP+OLZ up vs PCP	0.0542246	1	0.999419	0.885706	-1.12904	PCP down vs VEH
825_at	PRPF4B	PRP4 pre-mRNA processing factor 4 homolog B (yeast)	NM_003913	0.00987513	1	0.665766	0.633578	1	0.999954	0.973814	-1.02689	AHA down vs VEH	0.137742	1	0.81859	0.91703	-1.09048	AOL down vs VEH	0.0369232	1	0.514474	1.12684	1.12684	HAL up vs VEH	0.466484	1	0.999992	0.960196	-1.04145	OLZ down vs VEH	0.231401	1	0.999678	1.07326	1.07326	PCP+OLZ up vs PCP	0.0714139	1	0.999419	0.899362	-1.1119	PCP down vs VEH
37864_s_at	IGH@ /// IGHG1 /// IGHG2 /// IGHG3 /// IGHG4 /// IGHM /// IGHV4-31 /// LOC100294459	immunoglobulin heavy locus /// immunoglobulin heavy constant gamma 1 (G1m marker	XM_001718220 /// XM_002348257	0.00998508	1	0.665766	0.225159	1	0.999954	1.08395	1.08395	AHA up vs VEH	0.048205	1	0.81859	0.871035	-1.14806	AOL down vs VEH	0.57474	1	0.677773	1.03769	1.03769	HAL up vs VEH	0.0932675	1	0.999992	0.893547	-1.11914	OLZ down vs VEH	0.474722	1	0.999678	1.05095	1.05095	PCP+OLZ up vs PCP	0.0759344	1	0.999419	0.883777	-1.13151	PCP down vs VEH
31817_at	GABRB3	gamma-aminobutyric acid (GABA) A receptor, beta 3	NM_000814 /// NM_021912	0.0100164	1	0.665766	0.151409	1	0.999954	0.915231	-1.09262	AHA down vs VEH	0.0133327	1	0.81859	0.850012	-1.17645	AOL down vs VEH	0.00509615	1	0.514474	0.835369	-1.19708	HAL down vs VEH	0.0416326	1	0.999992	0.880228	-1.13607	OLZ down vs VEH	0.0162184	1	0.999678	1.17382	1.17382	PCP+OLZ up vs PCP	0.000278138	1	0.309501	0.778033	-1.28529	PCP down vs VEH
35662_at	CASP6	caspase 6, apoptosis-related cysteine peptidase	NM_001226 /// NM_032992	0.0100394	1	0.665766	0.508319	1	0.999954	1.04502	1.04502	AHA up vs VEH	0.54221	1	0.834851	0.958911	-1.04285	AOL down vs VEH	0.456723	1	0.601226	1.05083	1.05083	HAL up vs VEH	0.192795	1	0.999992	0.916285	-1.09136	OLZ down vs VEH	0.000779311	1	0.521501	0.77601	-1.28864	PCP+OLZ down vs PCP	0.0449216	1	0.999419	1.15216	1.15216	PCP up vs VEH
466_at	GTF2I /// GTF2IP1 /// LOC100093631	general transcription factor IIi /// general transcription factor IIi, pseudogen	NM_001163636 /// NM_001518 /// NM_032999 /// NM_033000 /// NM_033001 /// NR_0022	0.0107833	1	0.69362	0.473863	1	0.999954	1.03785	1.03785	AHA up vs VEH	0.0649736	1	0.81859	0.90396	-1.10624	AOL down vs VEH	0.249141	1	0.517751	1.06194	1.06194	HAL up vs VEH	0.939458	1	0.999992	1.00393	1.00393	OLZ up vs VEH	0.411002	1	0.999678	1.04597	1.04597	PCP+OLZ up vs PCP	0.0359362	1	0.999419	0.890766	-1.12263	PCP down vs VEH
33659_at	CFL1	cofilin 1 (non-muscle)	NM_005507	0.0107893	1	0.69362	0.416288	1	0.999954	1.04234	1.04234	AHA up vs VEH	0.341273	1	0.81859	0.950932	-1.0516	AOL down vs VEH	0.0210395	1	0.514474	1.12916	1.12916	HAL up vs VEH	0.105688	1	0.999992	1.08723	1.08723	OLZ up vs VEH	0.0143614	1	0.999678	1.14604	1.14604	PCP+OLZ up vs PCP	0.238187	1	0.999419	0.939287	-1.06464	PCP down vs VEH
2015_s_at	PMS2 /// PMS2CL	PMS2 postmeiotic segregation increased 2 (S. cerevisiae) /// PMS2 C-terminal lik	NM_000535 /// NR_002217 /// NR_003085	0.0107977	1	0.69362	0.0495243	1	0.999954	1.12367	1.12367	AHA up vs VEH	0.556981	1	0.838563	1.03586	1.03586	AOL up vs VEH	0.00289103	1	0.514474	1.20086	1.20086	HAL up vs VEH	0.0670963	1	0.999992	1.11442	1.11442	OLZ up vs VEH	0.0291675	1	0.999678	0.871819	-1.14703	PCP+OLZ down vs PCP	0.055366	1	0.999419	1.12487	1.12487	PCP up vs VEH
36160_s_at	PTPRN2	protein tyrosine phosphatase, receptor type, N polypeptide 2	NM_002847 /// NM_130842 /// NM_130843	0.0108572	1	0.69362	0.937271	1	0.999954	0.99534	-1.00468	AHA down vs VEH	0.253193	1	0.81859	0.93167	-1.07334	AOL down vs VEH	0.0360095	1	0.514474	1.13676	1.13676	HAL up vs VEH	0.640371	1	0.999992	1.02816	1.02816	OLZ up vs VEH	0.701859	1	0.999678	0.97634	-1.02423	PCP+OLZ down vs PCP	0.258409	1	0.999419	0.932328	-1.07258	PCP down vs VEH
34759_at	SLC30A1	Solute carrier family 30 (zinc transporter), member 1	NM_021194	0.0109635	1	0.69362	0.487446	1	0.999954	1.03725	1.03725	AHA up vs VEH	0.499749	1	0.824989	0.963901	-1.03745	AOL down vs VEH	0.0101972	1	0.514474	1.15144	1.15144	HAL up vs VEH	0.545056	1	0.999992	1.03236	1.03236	OLZ up vs VEH	0.178688	1	0.999678	1.07814	1.07814	PCP+OLZ up vs PCP	0.140855	1	0.999419	0.92197	-1.08463	PCP down vs VEH
37152_at	PPARD	peroxisome proliferator-activated receptor delta	NM_006238 /// NM_177435	0.0111069	1	0.69362	0.613403	1	0.999954	1.02974	1.02974	AHA up vs VEH	0.0139209	1	0.81859	0.857737	-1.16586	AOL down vs VEH	0.635671	1	0.719098	1.02785	1.02785	HAL up vs VEH	0.998599	1	0.999992	1.0001	1.0001	OLZ up vs VEH	0.196627	1	0.999678	1.08285	1.08285	PCP+OLZ up vs PCP	0.0198898	1	0.999419	0.865166	-1.15585	PCP down vs VEH
32183_at	SFRS11	splicing factor, arginine/serine-rich 11	NM_004768	0.011119	1	0.69362	0.269329	1	0.999954	0.931108	-1.07399	AHA down vs VEH	0.0312563	1	0.81859	0.862995	-1.15876	AOL down vs VEH	0.205453	1	0.514474	1.08549	1.08549	HAL up vs VEH	0.845678	1	0.999992	1.01256	1.01256	OLZ up vs VEH	0.467051	1	0.999678	1.05049	1.05049	PCP+OLZ up vs PCP	0.0458131	1	0.999419	0.872686	-1.14589	PCP down vs VEH
34820_at	PTN	pleiotrophin	NM_002825	0.0112432	1	0.695472	0.462577	1	0.999954	1.05196	1.05196	AHA up vs VEH	0.250256	1	0.81859	0.920853	-1.08595	AOL down vs VEH	0.0476232	1	0.514474	1.14996	1.14996	HAL up vs VEH	0.864926	1	0.999992	0.988378	-1.01176	OLZ down vs VEH	0.411534	1	0.999678	1.06149	1.06149	PCP+OLZ up vs PCP	0.0768473	1	0.999419	0.879342	-1.13721	PCP down vs VEH
38378_at	CD53	CD53 molecule	NM_000560 /// NM_001040033	0.011498	1	0.705304	0.324628	1	0.999954	0.932374	-1.07253	AHA down vs VEH	0.00627828	1	0.81859	0.810551	-1.23373	AOL down vs VEH	0.890733	1	0.916122	0.990343	-1.00975	HAL down vs VEH	0.280221	1	0.999992	0.926017	-1.07989	OLZ down vs VEH	0.305862	1	0.999678	1.07969	1.07969	PCP+OLZ up vs PCP	0.00279155	1	0.732442	0.792639	-1.26161	PCP down vs VEH
36118_at	NCOA1	nuclear receptor coactivator 1	NM_003743 /// NM_147223 /// NM_147233	0.0120094	1	0.730589	0.00315641	1	0.999954	1.19647	1.19647	AHA up vs VEH	0.5101	1	0.827594	1.03992	1.03992	AOL up vs VEH	0.00950874	1	0.514474	1.16816	1.16816	HAL up vs VEH	0.220619	1	0.999992	1.07344	1.07344	OLZ up vs VEH	0.107445	1	0.999678	0.905947	-1.10382	PCP+OLZ down vs PCP	0.12069	1	0.999419	1.09808	1.09808	PCP up vs VEH
AFFX-HSAC07/X00351_M_at	ACTB	actin, beta	NM_001101	0.0121184	1	0.731179	0.918995	1	0.999954	0.994684	-1.00534	AHA down vs VEH	0.488776	1	0.824989	0.963049	-1.03837	AOL down vs VEH	0.202767	1	0.514474	1.0698	1.0698	HAL up vs VEH	0.792881	1	0.999992	1.01386	1.01386	OLZ up vs VEH	0.000492401	1	0.507066	1.23231	1.23231	PCP+OLZ up vs PCP	0.0145881	1	0.999419	0.871095	-1.14798	PCP down vs VEH
789_at	EGR1	early growth response 1	NM_001964	0.0123159	1	0.736595	0.771669	1	0.999954	0.981125	-1.01924	AHA down vs VEH	0.00846019	1	0.81859	0.829154	-1.20605	AOL down vs VEH	0.405364	1	0.575476	1.05639	1.05639	HAL up vs VEH	0.632783	1	0.999992	1.0319	1.0319	OLZ up vs VEH	0.227172	1	0.999678	1.08791	1.08791	PCP+OLZ up vs PCP	0.0536023	1	0.999419	0.874146	-1.14397	PCP down vs VEH
37782_at	SST	somatostatin	NM_001048	0.0125062	1	0.736595	0.0422929	1	0.999954	1.12304	1.12304	AHA up vs VEH	0.710366	1	0.89153	1.02161	1.02161	AOL up vs VEH	0.000962074	1	0.514474	1.21854	1.21854	HAL up vs VEH	0.0416969	1	0.999992	1.12345	1.12345	OLZ up vs VEH	0.495869	1	0.999678	1.04079	1.04079	PCP+OLZ up vs PCP	0.0320124	1	0.999419	1.13579	1.13579	PCP up vs VEH
36906_at	CNR1	cannabinoid receptor 1 (brain)	NM_001160226 /// NM_001160258 /// NM_001160259 /// NM_001160260 /// NM_016083 //	0.0125084	1	0.736595	0.559535	1	0.999954	1.03534	1.03534	AHA up vs VEH	0.944712	1	0.978613	0.995749	-1.00427	AOL down vs VEH	0.0146097	1	0.514474	1.16292	1.16292	HAL up vs VEH	0.364934	1	0.999992	0.947348	-1.05558	OLZ down vs VEH	0.416671	1	0.999678	1.05232	1.05232	PCP+OLZ up vs PCP	0.202774	1	0.999419	0.923873	-1.0824	PCP down vs VEH
717_at	TRIB2	tribbles homolog 2 (Drosophila)	NM_021643 /// NR_027303	0.0130007	1	0.739258	0.372571	1	0.999954	1.05454	1.05454	AHA up vs VEH	0.106381	1	0.81859	0.9042	-1.10595	AOL down vs VEH	0.215853	1	0.514474	1.07688	1.07688	HAL up vs VEH	0.128621	1	0.999992	1.09573	1.09573	OLZ up vs VEH	0.35893	1	0.999678	1.05923	1.05923	PCP+OLZ up vs PCP	0.127575	1	0.999419	0.909412	-1.09961	PCP down vs VEH
37288_g_at	NRCAM	neuronal cell adhesion molecule	NM_001037132 /// NM_001037133 /// NM_005010	0.0133612	1	0.739258	0.069122	1	0.999954	0.88717	-1.12718	AHA down vs VEH	0.136538	1	0.81859	0.904193	-1.10596	AOL down vs VEH	0.748201	1	0.804951	1.02091	1.02091	HAL up vs VEH	0.271087	1	0.999992	0.931017	-1.07409	OLZ down vs VEH	0.020322	1	0.999678	1.17726	1.17726	PCP+OLZ up vs PCP	0.00116645	1	0.481517	0.792332	-1.2621	PCP down vs VEH
330_s_at	TUBA4A	tubulin, alpha 4a	NM_006000	0.0133848	1	0.739258	0.385643	1	0.999954	1.04828	1.04828	AHA up vs VEH	0.898447	1	0.962514	0.992885	-1.00717	AOL down vs VEH	0.0307497	1	0.514474	1.1281	1.1281	HAL up vs VEH	0.023884	1	0.999992	1.13476	1.13476	OLZ up vs VEH	0.030244	1	0.999678	1.13578	1.13578	PCP+OLZ up vs PCP	0.186873	1	0.999419	0.92794	-1.07766	PCP down vs VEH
713_at	MAX	MYC associated factor X	NM_002382 /// NM_145112 /// NM_145113 /// NM_145114 /// NM_145116 /// NM_197957	0.0134288	1	0.739258	0.283811	1	0.999954	1.07364	1.07364	AHA up vs VEH	0.289573	1	0.81859	0.929946	-1.07533	AOL down vs VEH	0.00954482	1	0.514474	1.19535	1.19535	HAL up vs VEH	0.768445	1	0.999992	0.980806	-1.01957	OLZ down vs VEH	0.547704	1	0.999678	1.04263	1.04263	PCP+OLZ up vs PCP	0.524051	1	0.999419	0.957401	-1.04449	PCP down vs VEH
40659_at	NR4A3	nuclear receptor subfamily 4, group A, member 3	NM_006981 /// NM_173198 /// NM_173199 /// NM_173200	0.0137238	1	0.739258	0.199953	1	0.999954	1.07358	1.07358	AHA up vs VEH	0.0797535	1	0.81859	0.903592	-1.10669	AOL down vs VEH	0.0259447	1	0.514474	1.13446	1.13446	HAL up vs VEH	0.546161	1	0.999992	1.0337	1.0337	OLZ up vs VEH	0.422374	1	0.999678	0.954585	-1.04758	PCP+OLZ down vs PCP	0.59147	1	0.999419	1.03099	1.03099	PCP up vs VEH
457_s_at	SUMO1	SMT3 suppressor of mif two 3 homolog 1 (S. cerevisiae)	NM_001005781 /// NM_001005782 /// NM_003352	0.0137385	1	0.739258	0.732686	1	0.999954	1.02403	1.02403	AHA up vs VEH	0.325314	1	0.81859	0.931318	-1.07375	AOL down vs VEH	0.0281455	1	0.514474	1.17062	1.17062	HAL up vs VEH	0.447657	1	0.999992	1.05438	1.05438	OLZ up vs VEH	0.0905976	1	0.999678	1.13448	1.13448	PCP+OLZ up vs PCP	0.0758158	1	0.999419	0.877669	-1.13938	PCP down vs VEH
1653_at	RPS3A	ribosomal protein S3A	NM_001006	0.0138537	1	0.739258	0.092305	1	0.999954	1.09362	1.09362	AHA up vs VEH	0.156192	1	0.81859	1.08065	1.08065	AOL up vs VEH	0.00206782	1	0.514474	1.18694	1.18694	HAL up vs VEH	0.453032	1	0.999992	1.04007	1.04007	OLZ up vs VEH	0.403212	1	0.999678	1.0472	1.0472	PCP+OLZ up vs PCP	0.634311	1	0.999419	0.974589	-1.02607	PCP down vs VEH
40484_g_at	C1orf61	chromosome 1 open reading frame 61	NM_006365	0.013888	1	0.739258	0.111435	1	0.999954	1.08811	1.08811	AHA up vs VEH	0.237187	1	0.81859	0.937645	-1.0665	AOL down vs VEH	0.0129427	1	0.514474	1.1447	1.1447	HAL up vs VEH	0.527186	1	0.999992	1.03362	1.03362	OLZ up vs VEH	0.620877	1	0.999678	1.02758	1.02758	PCP+OLZ up vs PCP	0.615889	1	0.999419	0.973217	-1.02752	PCP down vs VEH
1288_s_at	EEF1A1	eukaryotic translation elongation factor 1 alpha 1	NM_001402	0.0139464	1	0.739258	0.458473	1	0.999954	0.95765	-1.04422	AHA down vs VEH	0.533315	1	0.831673	1.03829	1.03829	AOL up vs VEH	0.161783	1	0.514474	1.08593	1.08593	HAL up vs VEH	0.783587	1	0.999992	0.984146	-1.01611	OLZ down vs VEH	0.0805952	1	0.999678	1.11538	1.11538	PCP+OLZ up vs PCP	0.0125302	1	0.999419	0.854827	-1.16983	PCP down vs VEH
34342_s_at	SPP1	secreted phosphoprotein 1	NM_000582 /// NM_001040058 /// NM_001040060	0.0140771	1	0.739258	0.835068	1	0.999954	1.01431	1.01431	AHA up vs VEH	0.582398	1	0.848581	0.961846	-1.03967	AOL down vs VEH	0.0474435	1	0.514474	1.149	1.149	HAL up vs VEH	0.725901	1	0.999992	0.97634	-1.02423	OLZ down vs VEH	0.00253924	1	0.999678	1.2595	1.2595	PCP+OLZ up vs PCP	0.183819	1	0.999419	0.909322	-1.09972	PCP down vs VEH
905_at	GUK1	guanylate kinase 1	NM_000858 /// NM_001159390 /// NM_001159391	0.0141546	1	0.739258	0.566784	1	0.999954	1.03557	1.03557	AHA up vs VEH	0.337773	1	0.81859	0.941061	-1.06263	AOL down vs VEH	0.0128101	1	0.514474	1.17116	1.17116	HAL up vs VEH	0.386318	1	0.999992	1.05444	1.05444	OLZ up vs VEH	0.158028	1	0.999678	1.09604	1.09604	PCP+OLZ up vs PCP	0.191126	1	0.999419	0.920005	-1.08695	PCP down vs VEH
38038_at	LUM	lumican	NM_002345	0.0141612	1	0.739258	0.0805424	1	0.999954	1.10963	1.10963	AHA up vs VEH	0.938904	1	0.976307	0.995386	-1.00464	AOL down vs VEH	0.0135007	1	0.514474	1.16197	1.16197	HAL up vs VEH	0.910728	1	0.999992	0.993482	-1.00656	OLZ down vs VEH	0.2117	1	0.999678	0.925437	-1.08057	PCP+OLZ down vs PCP	0.729442	1	0.999419	1.02113	1.02113	PCP up vs VEH
35145_at	MNT	MAX binding protein	NM_020310	0.0144934	1	0.739258	0.262906	1	0.999954	1.06416	1.06416	AHA up vs VEH	0.0844749	1	0.81859	0.904564	-1.1055	AOL down vs VEH	0.023142	1	0.514474	1.13828	1.13828	HAL up vs VEH	0.583152	1	0.999992	1.03075	1.03075	OLZ up vs VEH	0.402935	1	0.999678	1.04994	1.04994	PCP+OLZ up vs PCP	0.54608	1	0.999419	0.966066	-1.03513	PCP down vs VEH
36499_at	CELSR2	cadherin, EGF LAG seven-pass G-type receptor 2 (flamingo homolog, Drosophila)	NM_001408	0.0145331	1	0.739258	0.539509	1	0.999954	1.03584	1.03584	AHA up vs VEH	0.0296766	1	0.81859	0.87551	-1.14219	AOL down vs VEH	0.194212	1	0.514474	1.07806	1.07806	HAL up vs VEH	0.724922	1	0.999992	1.02037	1.02037	OLZ up vs VEH	0.144389	1	0.999678	1.09335	1.09335	PCP+OLZ up vs PCP	0.0706043	1	0.999419	0.896206	-1.11581	PCP down vs VEH
1440_s_at	FAS	Fas (TNF receptor superfamily, member 6)	NM_000043 /// NM_152871 /// NM_152872 /// NM_152873 /// NM_152874 /// NM_152875	0.0146264	1	0.739258	0.132935	1	0.999954	1.12745	1.12745	AHA up vs VEH	0.729381	1	0.900319	0.972226	-1.02857	AOL down vs VEH	0.00347596	1	0.514474	1.27567	1.27567	HAL up vs VEH	0.932915	1	0.999992	1.00664	1.00664	OLZ up vs VEH	0.233677	1	0.999678	0.905258	-1.10466	PCP+OLZ down vs PCP	0.273013	1	0.999419	1.09417	1.09417	PCP up vs VEH
2035_s_at	ENO1	enolase 1, (alpha)	NM_001428	0.0147324	1	0.739258	0.781846	1	0.999954	1.01906	1.01906	AHA up vs VEH	0.412299	1	0.819966	0.943577	-1.0598	AOL down vs VEH	0.207517	1	0.514474	1.09071	1.09071	HAL up vs VEH	0.0560376	1	0.999992	1.14279	1.14279	OLZ up vs VEH	0.0140407	1	0.999678	1.20152	1.20152	PCP+OLZ up vs PCP	0.0556463	1	0.999419	0.870685	-1.14852	PCP down vs VEH
1424_s_at	YWHAH	tyrosine 3-monooxygenase/tryptophan 5-monooxygenase activation protein, eta poly	NM_003405	0.0148511	1	0.739258	0.268798	1	0.999954	1.05706	1.05706	AHA up vs VEH	0.892897	1	0.961263	0.993089	-1.00696	AOL down vs VEH	0.00635971	1	0.514474	1.15354	1.15354	HAL up vs VEH	0.0090399	1	0.999992	1.14575	1.14575	OLZ up vs VEH	0.949264	1	0.999678	1.00334	1.00334	PCP+OLZ up vs PCP	0.767086	1	0.999419	1.0154	1.0154	PCP up vs VEH
38470_i_at	APPBP2	amyloid beta precursor protein (cytoplasmic tail) binding protein 2	NM_006380	0.0150924	1	0.739258	0.00327419	1	0.999954	0.785142	-1.27366	AHA down vs VEH	0.328069	1	0.81859	0.924047	-1.0822	AOL down vs VEH	0.740867	1	0.799637	0.974654	-1.026	HAL down vs VEH	0.560687	1	0.999992	1.04627	1.04627	OLZ up vs VEH	0.422195	1	0.999678	1.06805	1.06805	PCP+OLZ up vs PCP	0.102014	1	0.999419	0.874809	-1.14311	PCP down vs VEH
33136_at	UBE2I	Ubiquitin-conjugating enzyme E2I (UBC9 homolog, yeast)	NM_003345 /// NM_194259 /// NM_194260 /// NM_194261	0.0152917	1	0.739258	0.100929	1	0.999954	1.10772	1.10772	AHA up vs VEH	0.334565	1	0.81859	0.940325	-1.06346	AOL down vs VEH	0.00843514	1	0.514474	1.18422	1.18422	HAL up vs VEH	0.174615	1	0.999992	1.08782	1.08782	OLZ up vs VEH	0.19518	1	0.999678	0.918991	-1.08815	PCP+OLZ down vs PCP	0.18632	1	0.999419	1.08852	1.08852	PCP up vs VEH
33154_at	PSMB4	proteasome (prosome, macropain) subunit, beta type, 4	NM_002796	0.0153151	1	0.739258	0.0833922	1	0.999954	1.12152	1.12152	AHA up vs VEH	0.971316	1	0.989687	1.00242	1.00242	AOL up vs VEH	0.0015887	1	0.514474	1.24534	1.24534	HAL up vs VEH	0.0472083	1	0.999992	1.14144	1.14144	OLZ up vs VEH	0.594788	1	0.999678	1.0371	1.0371	PCP+OLZ up vs PCP	0.856721	1	0.999419	1.01222	1.01222	PCP up vs VEH
31848_at	CADPS	Ca++-dependent secretion activator	NM_003716 /// NM_183393 /// NM_183394	0.0153558	1	0.739258	0.669393	1	0.999954	1.03084	1.03084	AHA up vs VEH	0.170623	1	0.81859	0.903049	-1.10736	AOL down vs VEH	0.0165151	1	0.514474	1.19367	1.19367	HAL up vs VEH	0.467397	1	0.999992	1.05317	1.05317	OLZ up vs VEH	0.201999	1	0.999678	1.10128	1.10128	PCP+OLZ up vs PCP	0.2691	1	0.999419	0.921288	-1.08544	PCP down vs VEH
38062_at	RAPGEF5	Rap guanine nucleotide exchange factor (GEF) 5	NM_012294	0.015472	1	0.739258	0.729818	1	0.999954	0.980609	-1.01977	AHA down vs VEH	0.0795556	1	0.81859	0.900416	-1.1106	AOL down vs VEH	0.0922106	1	0.514474	1.1021	1.1021	HAL up vs VEH	0.466714	1	0.999992	1.04225	1.04225	OLZ up vs VEH	0.0245513	1	0.999678	1.14883	1.14883	PCP+OLZ up vs PCP	0.11073	1	0.999419	0.909199	-1.09987	PCP down vs VEH
38699_at	TUBB4	tubulin, beta 4	NM_006087	0.0155802	1	0.739258	0.697492	1	0.999954	1.02261	1.02261	AHA up vs VEH	0.00297598	1	0.81859	0.82904	-1.20621	AOL down vs VEH	0.57335	1	0.676785	1.03296	1.03296	HAL up vs VEH	0.903889	1	0.999992	0.993084	-1.00696	OLZ down vs VEH	0.376004	1	0.999678	1.05532	1.05532	PCP+OLZ up vs PCP	0.207654	1	0.999419	0.927	-1.07875	PCP down vs VEH
36660_at	RAB11A	RAB11A, member RAS oncogene family	NM_004663	0.0157409	1	0.739258	0.212896	1	0.999954	0.925043	-1.08103	AHA down vs VEH	0.0101726	1	0.81859	0.841899	-1.18779	AOL down vs VEH	0.355884	1	0.553416	1.05916	1.05916	HAL up vs VEH	0.948337	1	0.999992	0.995997	-1.00402	OLZ down vs VEH	0.331742	1	0.999678	1.06573	1.06573	PCP+OLZ up vs PCP	0.0515783	1	0.999419	0.879828	-1.13659	PCP down vs VEH
38370_at	TIAM1	T-cell lymphoma invasion and metastasis 1	NM_003253	0.0157849	1	0.739258	0.818396	1	0.999954	0.983885	-1.01638	AHA down vs VEH	0.183647	1	0.81859	0.906239	-1.10346	AOL down vs VEH	0.204794	1	0.514474	1.09489	1.09489	HAL up vs VEH	0.56854	1	0.999992	1.04125	1.04125	OLZ up vs VEH	0.596637	1	0.999678	0.961284	-1.04028	PCP+OLZ down vs PCP	0.135867	1	0.999419	0.895035	-1.11727	PCP down vs VEH
39353_at	HSPE1	heat shock 10kDa protein 1 (chaperonin 10)	NM_002157	0.0158815	1	0.739258	0.0561462	1	0.999954	1.10996	1.10996	AHA up vs VEH	0.983187	1	0.993682	1.00116	1.00116	AOL up vs VEH	0.00165408	1	0.514474	1.19646	1.19646	HAL up vs VEH	0.368548	1	0.999992	1.04937	1.04937	OLZ up vs VEH	0.523829	1	0.999678	1.03652	1.03652	PCP+OLZ up vs PCP	0.991472	1	0.999419	1.00059	1.00059	PCP up vs VEH
38085_at	CBX3 /// LOC644101	chromobox homolog 3 (HP1 gamma homolog, Drosophila) /// similar to chromobox hom	NM_007276 /// NM_016587 /// XR_016921 /// XR_019241 /// XR_039403	0.0160424	1	0.739258	0.191728	1	0.999954	0.918954	-1.08819	AHA down vs VEH	0.107689	1	0.81859	0.897277	-1.11448	AOL down vs VEH	0.612388	1	0.701402	1.03302	1.03302	HAL up vs VEH	0.549509	1	0.999992	0.962327	-1.03915	OLZ down vs VEH	0.00640561	1	0.999678	1.21312	1.21312	PCP+OLZ up vs PCP	0.0021777	1	0.641201	0.805275	-1.24181	PCP down vs VEH
31863_at	RRP1B	ribosomal RNA processing 1 homolog B (S. cerevisiae)	NM_015056	0.0160833	1	0.739258	0.500114	1	0.999954	1.03579	1.03579	AHA up vs VEH	0.12222	1	0.81859	0.919009	-1.08813	AOL down vs VEH	0.0315849	1	0.514474	1.12218	1.12218	HAL up vs VEH	0.658136	1	0.999992	0.977231	-1.0233	OLZ down vs VEH	0.96072	1	0.999678	0.997308	-1.0027	PCP+OLZ down vs PCP	0.448498	1	0.999419	0.959863	-1.04182	PCP down vs VEH
35294_at	TROVE2	TROVE domain family, member 2	NM_001042369 /// NM_001042370 /// NM_004600	0.0161285	1	0.739258	0.156938	1	0.999954	1.09129	1.09129	AHA up vs VEH	0.329197	1	0.81859	0.94001	-1.06382	AOL down vs VEH	0.0290953	1	0.514474	1.14707	1.14707	HAL up vs VEH	0.974726	1	0.999992	0.998073	-1.00193	OLZ down vs VEH	0.506792	1	0.999678	1.04361	1.04361	PCP+OLZ up vs PCP	0.259438	1	0.999419	0.930778	-1.07437	PCP down vs VEH
1073_at	TCEA1	transcription elongation factor A (SII), 1	NM_006756 /// NM_201437	0.0161312	1	0.739258	0.906978	1	0.999954	1.00778	1.00778	AHA up vs VEH	0.120432	1	0.81859	0.897315	-1.11444	AOL down vs VEH	0.248005	1	0.517751	1.08041	1.08041	HAL up vs VEH	0.930297	1	0.999992	1.00582	1.00582	OLZ up vs VEH	0.863926	1	0.999678	1.01205	1.01205	PCP+OLZ up vs PCP	0.0486522	1	0.999419	0.87015	-1.14923	PCP down vs VEH
37031_at	FAM120A	family with sequence similarity 120A	NM_014612	0.0163173	1	0.739258	0.127238	1	0.999954	1.09019	1.09019	AHA up vs VEH	0.618849	1	0.860366	0.971669	-1.02916	AOL down vs VEH	0.0150458	1	0.514474	1.15148	1.15148	HAL up vs VEH	0.320364	1	0.999992	1.05735	1.05735	OLZ up vs VEH	0.893839	1	0.999678	1.00786	1.00786	PCP+OLZ up vs PCP	0.474237	1	0.999419	0.959387	-1.04233	PCP down vs VEH
33942_s_at	STXBP1	syntaxin binding protein 1	NM_001032221 /// NM_003165	0.0163451	1	0.739258	0.769015	1	0.999954	0.983661	-1.01661	AHA down vs VEH	0.0217127	1	0.81859	0.871142	-1.14792	AOL down vs VEH	0.0921253	1	0.514474	1.10103	1.10103	HAL up vs VEH	0.959096	1	0.999992	0.997129	-1.00288	OLZ down vs VEH	0.189984	1	0.999678	1.0814	1.0814	PCP+OLZ up vs PCP	0.194437	1	0.999419	0.926627	-1.07918	PCP down vs VEH
32512_at	NEFM	neurofilament, medium polypeptide	NM_001105541 /// NM_005382	0.0164221	1	0.739258	0.992967	1	0.999954	0.999352	-1.00065	AHA down vs VEH	0.0720105	1	0.81859	0.869534	-1.15004	AOL down vs VEH	0.133654	1	0.514474	1.11841	1.11841	HAL up vs VEH	0.108658	1	0.999992	1.12745	1.12745	OLZ up vs VEH	0.0807811	1	0.999678	1.14787	1.14787	PCP+OLZ up vs PCP	0.274743	1	0.999419	0.919607	-1.08742	PCP down vs VEH
32855_at	LDLR	low density lipoprotein receptor	NM_000527	0.0167476	1	0.739258	0.265791	1	0.999954	1.06259	1.06259	AHA up vs VEH	0.11537	1	0.81859	0.914287	-1.09375	AOL down vs VEH	0.0379667	1	0.514474	1.12252	1.12252	HAL up vs VEH	0.443029	1	0.999992	1.04255	1.04255	OLZ up vs VEH	0.98269	1	0.999678	0.998765	-1.00124	PCP+OLZ down vs PCP	0.553791	1	0.999419	0.967289	-1.03382	PCP down vs VEH
35246_at	TYRO3	TYRO3 protein tyrosine kinase	NM_006293	0.0168877	1	0.739258	0.127134	1	0.999954	1.11364	1.11364	AHA up vs VEH	0.570368	1	0.843825	0.959948	-1.04172	AOL down vs VEH	0.0751563	1	0.514474	1.13459	1.13459	HAL up vs VEH	0.045147	1	0.999992	1.15369	1.15369	OLZ up vs VEH	0.559289	1	0.999678	1.04373	1.04373	PCP+OLZ up vs PCP	0.334137	1	0.999419	0.932462	-1.07243	PCP down vs VEH
953_g_at	FKBP1A	FK506 binding protein 1A, 12kDa	NM_000801 /// NM_054014	0.0169324	1	0.739258	0.31468	1	0.999954	0.929636	-1.07569	AHA down vs VEH	0.722912	1	0.897742	0.973884	-1.02682	AOL down vs VEH	0.742904	1	0.800572	1.02394	1.02394	HAL up vs VEH	0.702885	1	0.999992	0.972855	-1.0279	OLZ down vs VEH	0.00208625	1	0.999678	1.28284	1.28284	PCP+OLZ up vs PCP	0.00154224	1	0.516021	0.776403	-1.28799	PCP down vs VEH
36943_r_at	PLAGL1	pleiomorphic adenoma gene-like 1	NM_001080951 /// NM_001080952 /// NM_001080953 /// NM_001080954 /// NM_001080955	0.0171184	1	0.739258	0.283393	1	0.999954	1.07556	1.07556	AHA up vs VEH	0.608525	1	0.856231	0.964863	-1.03642	AOL down vs VEH	0.0102882	1	0.514474	1.19813	1.19813	HAL up vs VEH	0.762429	1	0.999992	1.02059	1.02059	OLZ up vs VEH	0.297818	1	0.999678	1.07724	1.07724	PCP+OLZ up vs PCP	0.24232	1	0.999419	0.920949	-1.08584	PCP down vs VEH
36144_at	SYT11	synaptotagmin XI	NM_152280	0.0171398	1	0.739258	0.915105	1	0.999954	1.00742	1.00742	AHA up vs VEH	0.395549	1	0.819966	0.940594	-1.06316	AOL down vs VEH	0.0165568	1	0.514474	1.18854	1.18854	HAL up vs VEH	0.190539	1	0.999992	1.09616	1.09616	OLZ up vs VEH	0.70896	1	0.999678	1.02765	1.02765	PCP+OLZ up vs PCP	0.392229	1	0.999419	0.940119	-1.0637	PCP down vs VEH
751_at	PIGC	phosphatidylinositol glycan anchor biosynthesis, class C	NM_002642 /// NM_153747	0.0173237	1	0.739258	0.976987	1	0.999954	1.00189	1.00189	AHA up vs VEH	0.398655	1	0.819966	0.944276	-1.05901	AOL down vs VEH	0.027094	1	0.514474	1.16097	1.16097	HAL up vs VEH	0.754051	1	0.999992	1.0207	1.0207	OLZ up vs VEH	0.0847314	1	0.999678	1.12862	1.12862	PCP+OLZ up vs PCP	0.0705025	1	0.999419	0.882376	-1.1333	PCP down vs VEH
39165_at	ISCU	iron-sulfur cluster scaffold homolog (E. coli)	NM_014301 /// NM_213595	0.0174074	1	0.739258	0.542013	1	0.999954	1.04364	1.04364	AHA up vs VEH	0.578504	1	0.846657	0.960554	-1.04107	AOL down vs VEH	0.00172556	1	0.514474	1.26374	1.26374	HAL up vs VEH	0.30273	1	0.999992	1.07522	1.07522	OLZ up vs VEH	0.60956	1	0.999678	1.03835	1.03835	PCP+OLZ up vs PCP	0.742492	1	0.999419	1.02408	1.02408	PCP up vs VEH
1448_at	PSMA3	proteasome (prosome, macropain) subunit, alpha type, 3	NM_002788 /// NM_152132	0.0174362	1	0.739258	0.473549	1	0.999954	1.05151	1.05151	AHA up vs VEH	0.703318	1	0.88954	0.972833	-1.02793	AOL down vs VEH	0.00383221	1	0.514474	1.23826	1.23826	HAL up vs VEH	0.110892	1	0.999992	1.1199	1.1199	OLZ up vs VEH	0.314274	1	0.999678	1.07733	1.07733	PCP+OLZ up vs PCP	0.622819	1	0.999419	0.964993	-1.03628	PCP down vs VEH
32674_at	ZNF638	zinc finger protein 638	NM_001014972 /// NM_014497	0.0174463	1	0.739258	0.762762	1	0.999954	1.01655	1.01655	AHA up vs VEH	0.0419794	1	0.81859	0.889094	-1.12474	AOL down vs VEH	0.130218	1	0.514474	1.08708	1.08708	HAL up vs VEH	0.176304	1	0.999992	1.07722	1.07722	OLZ up vs VEH	0.735756	1	0.999678	1.01951	1.01951	PCP+OLZ up vs PCP	0.414713	1	0.999419	0.954937	-1.04719	PCP down vs VEH
399_at	STK25	serine/threonine kinase 25 (STE20 homolog, yeast)	NM_006374	0.0174728	1	0.739258	0.673301	1	0.999954	0.973304	-1.02743	AHA down vs VEH	0.29845	1	0.81859	0.932902	-1.07192	AOL down vs VEH	0.15169	1	0.514474	1.09764	1.09764	HAL up vs VEH	0.412073	1	0.999992	1.05424	1.05424	OLZ up vs VEH	0.0382311	1	0.999678	1.15483	1.15483	PCP+OLZ up vs PCP	0.0190309	1	0.999419	0.850817	-1.17534	PCP down vs VEH
40753_at	SNCB	synuclein, beta	NM_001001502 /// NM_003085	0.017532	1	0.739258	0.475509	1	0.999954	1.03791	1.03791	AHA up vs VEH	0.0132855	1	0.81859	0.870457	-1.14882	AOL down vs VEH	0.358061	1	0.553792	1.0492	1.0492	HAL up vs VEH	0.39753	1	0.999992	1.04517	1.04517	OLZ up vs VEH	0.143056	1	0.999678	1.08468	1.08468	PCP+OLZ up vs PCP	0.288765	1	0.999419	0.944095	-1.05922	PCP down vs VEH
34116_at	CACNB4	calcium channel, voltage-dependent, beta 4 subunit	NM_000726 /// NM_001005746 /// NM_001005747 /// NM_001145798	0.0175482	1	0.739258	0.0356915	1	0.999954	0.873627	-1.14465	AHA down vs VEH	0.0121158	1	0.81859	0.844425	-1.18424	AOL down vs VEH	0.00864819	1	0.514474	0.842176	-1.1874	HAL down vs VEH	0.208663	1	0.999992	0.923726	-1.08257	OLZ down vs VEH	0.0170258	1	0.999678	1.17704	1.17704	PCP+OLZ up vs PCP	0.00113439	1	0.481517	0.797519	-1.25389	PCP down vs VEH
32318_s_at	ACTB	actin, beta	NM_001101	0.0177098	1	0.739258	0.362946	1	0.999954	1.05304	1.05304	AHA up vs VEH	0.0962224	1	0.81859	0.905699	-1.10412	AOL down vs VEH	0.166878	1	0.514474	1.08231	1.08231	HAL up vs VEH	0.142534	1	0.999992	1.08768	1.08768	OLZ up vs VEH	0.0825135	1	0.999678	1.11114	1.11114	PCP+OLZ up vs PCP	0.147532	1	0.999419	0.917643	-1.08975	PCP down vs VEH
363_at	PRKCG	protein kinase C, gamma	NM_002739	0.0178291	1	0.739258	0.470834	1	0.999954	0.961616	-1.03992	AHA down vs VEH	0.111312	1	0.81859	0.913355	-1.09486	AOL down vs VEH	0.969821	1	0.978327	0.997956	-1.00205	HAL down vs VEH	0.420341	1	0.999992	0.957168	-1.04475	OLZ down vs VEH	0.000688855	1	0.507066	1.23254	1.23254	PCP+OLZ up vs PCP	0.00292027	1	0.732442	0.837743	-1.19368	PCP down vs VEH
1039_s_at	HIF1A	hypoxia inducible factor 1, alpha subunit (basic helix-loop-helix transcription	NM_001530 /// NM_181054	0.0178456	1	0.739258	0.58558	1	0.999954	0.96669	-1.03446	AHA down vs VEH	0.157204	1	0.81859	0.912133	-1.09633	AOL down vs VEH	0.0636243	1	0.514474	1.1249	1.1249	HAL up vs VEH	0.897384	1	0.999992	0.992034	-1.00803	OLZ down vs VEH	0.834528	1	0.999678	1.01374	1.01374	PCP+OLZ up vs PCP	0.126139	1	0.999419	0.905034	-1.10493	PCP down vs VEH
40435_at	SLC25A6	solute carrier family 25 (mitochondrial carrier; adenine nucleotide translocator	NM_001636	0.0178863	1	0.739258	0.338207	1	0.999954	0.941055	-1.06264	AHA down vs VEH	0.115699	1	0.81859	0.900933	-1.10996	AOL down vs VEH	0.596682	1	0.691125	1.03399	1.03399	HAL up vs VEH	0.637077	1	0.999992	0.970649	-1.03024	OLZ down vs VEH	0.00841189	1	0.999678	1.20119	1.20119	PCP+OLZ up vs PCP	0.00210185	1	0.641201	0.807221	-1.23882	PCP down vs VEH
32654_g_at	BRD8	bromodomain containing 8	NM_001164326 /// NM_006696 /// NM_139199 /// NM_183359	0.0180775	1	0.739258	0.126992	1	0.999954	1.10589	1.10589	AHA up vs VEH	0.604792	1	0.856231	0.96577	-1.03544	AOL down vs VEH	0.0278624	1	0.514474	1.15897	1.15897	HAL up vs VEH	0.0110081	1	0.999992	1.18822	1.18822	OLZ up vs VEH	0.711919	1	0.999678	0.975047	-1.02559	PCP+OLZ down vs PCP	0.0190828	1	0.999419	1.17772	1.17772	PCP up vs VEH
37736_at	PCMT1	protein-L-isoaspartate (D-aspartate) O-methyltransferase	NM_005389	0.0181055	1	0.739258	0.917681	1	0.999954	0.992718	-1.00734	AHA down vs VEH	0.235356	1	0.81859	0.916096	-1.09159	AOL down vs VEH	0.152526	1	0.514474	1.108	1.108	HAL up vs VEH	0.143445	1	0.999992	1.11065	1.11065	OLZ up vs VEH	0.273949	1	0.999678	1.08557	1.08557	PCP+OLZ up vs PCP	0.0788465	1	0.999419	0.876863	-1.14043	PCP down vs VEH
41504_s_at	MAF	v-maf musculoaponeurotic fibrosarcoma oncogene homolog (avian)	NM_001031804 /// NM_005360	0.0181572	1	0.739258	0.62817	1	0.999954	0.967058	-1.03406	AHA down vs VEH	0.0806607	1	0.81859	0.880397	-1.13585	AOL down vs VEH	0.405232	1	0.575476	1.05944	1.05944	HAL up vs VEH	0.934786	1	0.999992	0.994365	-1.00567	OLZ down vs VEH	0.52415	1	0.999678	1.04753	1.04753	PCP+OLZ up vs PCP	0.0165157	1	0.999419	0.836744	-1.19511	PCP down vs VEH
33819_at	LDHB	lactate dehydrogenase B	NM_002300	0.0181948	1	0.739258	0.993856	1	0.999954	1.00048	1.00048	AHA up vs VEH	0.327328	1	0.81859	0.93785	-1.06627	AOL down vs VEH	0.146802	1	0.514474	1.097	1.097	HAL up vs VEH	0.423799	1	0.999992	1.05184	1.05184	OLZ up vs VEH	0.347635	1	0.999678	1.06458	1.06458	PCP+OLZ up vs PCP	0.0383748	1	0.999419	0.870329	-1.14899	PCP down vs VEH
34644_at	B2M	beta-2-microglobulin	NM_004048	0.0186491	1	0.739258	0.883094	1	0.999954	1.00781	1.00781	AHA up vs VEH	0.794455	1	0.920735	1.01437	1.01437	AOL up vs VEH	0.23667	1	0.516024	1.06525	1.06525	HAL up vs VEH	0.0293543	1	0.999992	0.887775	-1.12641	OLZ down vs VEH	0.783099	1	0.999678	0.984771	-1.01546	PCP+OLZ down vs PCP	0.250818	1	0.999419	0.938472	-1.06556	PCP down vs VEH
31510_s_at	H3F3B	H3 histone, family 3B (H3.3B)	NM_005324	0.0186722	1	0.739258	0.266689	1	0.999954	1.0608	1.0608	AHA up vs VEH	0.722018	1	0.897742	0.980772	-1.01961	AOL down vs VEH	0.0196808	1	0.514474	1.136	1.136	HAL up vs VEH	0.356041	1	0.999992	0.952256	-1.05014	OLZ down vs VEH	0.414618	1	0.999678	1.04652	1.04652	PCP+OLZ up vs PCP	0.340105	1	0.999419	0.948955	-1.05379	PCP down vs VEH
537_f_at	BCR	breakpoint cluster region	NM_004327 /// NM_021574	0.0186814	1	0.739258	0.926477	1	0.999954	0.995231	-1.00479	AHA down vs VEH	0.0713842	1	0.81859	0.905969	-1.10379	AOL down vs VEH	0.502351	1	0.629662	1.03546	1.03546	HAL up vs VEH	0.84833	1	0.999992	0.99014	-1.00996	OLZ down vs VEH	0.0108992	1	0.999678	1.15609	1.15609	PCP+OLZ up vs PCP	0.00519719	1	0.999419	0.853797	-1.17124	PCP down vs VEH
891_at	YY1	YY1 transcription factor	NM_003403	0.01873	1	0.739258	0.88201	1	0.999954	0.988551	-1.01158	AHA down vs VEH	0.0966533	1	0.81859	0.873011	-1.14546	AOL down vs VEH	0.156709	1	0.514474	1.11777	1.11777	HAL up vs VEH	0.640048	1	0.999992	1.03699	1.03699	OLZ up vs VEH	0.689496	1	0.999678	1.0332	1.0332	PCP+OLZ up vs PCP	0.0779396	1	0.999419	0.865367	-1.15558	PCP down vs VEH
504_at	UBE2D3	ubiquitin-conjugating enzyme E2D 3 (UBC4/5 homolog, yeast)	NM_003340 /// NM_181886 /// NM_181887 /// NM_181888 /// NM_181889 /// NM_181890	0.0188551	1	0.739258	0.0817871	1	0.999954	0.883063	-1.13242	AHA down vs VEH	0.0268216	1	0.81859	0.847245	-1.1803	AOL down vs VEH	0.891541	1	0.916241	1.00959	1.00959	HAL up vs VEH	0.663762	1	0.999992	0.969982	-1.03095	OLZ down vs VEH	0.0254951	1	0.999678	1.18565	1.18565	PCP+OLZ up vs PCP	0.00380038	1	0.902406	0.800793	-1.24876	PCP down vs VEH
2086_s_at	TYRO3	TYRO3 protein tyrosine kinase	NM_006293	0.0189023	1	0.739258	0.160375	1	0.999954	1.11027	1.11027	AHA up vs VEH	0.659366	1	0.871069	0.966977	-1.03415	AOL down vs VEH	0.162052	1	0.514474	1.1098	1.1098	HAL up vs VEH	0.0350963	1	0.999992	1.17311	1.17311	OLZ up vs VEH	0.926652	1	0.999678	1.00715	1.00715	PCP+OLZ up vs PCP	0.387754	1	0.999419	0.936023	-1.06835	PCP down vs VEH
36786_at	RPL10A	ribosomal protein L10a	NM_007104	0.0189764	1	0.739258	0.63817	1	0.999954	1.02538	1.02538	AHA up vs VEH	0.159441	1	0.81859	1.08167	1.08167	AOL up vs VEH	0.00772503	1	0.514474	1.16037	1.16037	HAL up vs VEH	0.516842	1	0.999992	1.0352	1.0352	OLZ up vs VEH	0.100372	1	0.999678	1.09828	1.09828	PCP+OLZ up vs PCP	0.235333	1	0.999419	0.936097	-1.06826	PCP down vs VEH
36941_at	MLLT11	myeloid/lymphoid or mixed-lineage leukemia (trithorax homolog, Drosophila); tran	NM_006818	0.0190121	1	0.739258	0.979793	1	0.999954	1.00174	1.00174	AHA up vs VEH	0.135305	1	0.81859	0.89774	-1.11391	AOL down vs VEH	0.0407925	1	0.514474	1.1557	1.1557	HAL up vs VEH	0.295106	1	0.999992	1.07524	1.07524	OLZ up vs VEH	0.595911	1	0.999678	1.03922	1.03922	PCP+OLZ up vs PCP	0.295595	1	0.999419	0.92769	-1.07795	PCP down vs VEH
40631_at	TOB1	transducer of ERBB2, 1	NM_005749	0.0191552	1	0.739258	0.764255	1	0.999954	1.02207	1.02207	AHA up vs VEH	0.0618448	1	0.81859	0.865986	-1.15475	AOL down vs VEH	0.141843	1	0.514474	1.11452	1.11452	HAL up vs VEH	0.723755	1	0.999992	1.02607	1.02607	OLZ up vs VEH	0.128297	1	0.999678	1.1256	1.1256	PCP+OLZ up vs PCP	0.0542573	1	0.999419	0.861834	-1.16032	PCP down vs VEH
41003_at	PFDN4	prefoldin subunit 4	NM_002623	0.0191609	1	0.739258	0.662106	1	0.999954	1.02105	1.02105	AHA up vs VEH	0.0985042	1	0.81859	0.92046	-1.08641	AOL down vs VEH	0.110184	1	0.514474	1.08043	1.08043	HAL up vs VEH	0.810373	1	0.999992	0.988637	-1.01149	OLZ down vs VEH	0.0105822	1	0.999678	1.14329	1.14329	PCP+OLZ up vs PCP	0.196447	1	0.999419	0.937617	-1.06653	PCP down vs VEH
38089_at	UBAP2L	ubiquitin associated protein 2-like	NM_001127320 /// NM_014847	0.0191686	1	0.739258	0.843125	1	0.999954	0.987122	-1.01305	AHA down vs VEH	0.378582	1	0.81859	0.941802	-1.06179	AOL down vs VEH	0.0511764	1	0.514474	1.13995	1.13995	HAL up vs VEH	0.768213	1	0.999992	0.980876	-1.0195	OLZ down vs VEH	0.0454177	1	0.999678	1.15222	1.15222	PCP+OLZ up vs PCP	0.0368334	1	0.999419	0.864338	-1.15696	PCP down vs VEH
39537_at	KLHDC3	kelch domain containing 3	NM_057161	0.0192155	1	0.739258	0.278069	1	0.999954	0.933183	-1.0716	AHA down vs VEH	0.713485	1	0.893692	0.976235	-1.02434	AOL down vs VEH	0.510896	1	0.635052	1.04259	1.04259	HAL up vs VEH	0.570071	1	0.999992	0.964636	-1.03666	OLZ down vs VEH	0.00520411	1	0.999678	1.21675	1.21675	PCP+OLZ up vs PCP	0.0024904	1	0.678956	0.809894	-1.23473	PCP down vs VEH
37289_at	CDH8	cadherin 8, type 2	NM_001796	0.0192945	1	0.739258	0.839129	1	0.999954	0.987167	-1.013	AHA down vs VEH	0.0279157	1	0.81859	0.861185	-1.16119	AOL down vs VEH	0.443292	1	0.594259	1.05017	1.05017	HAL up vs VEH	0.280311	1	0.999992	1.07166	1.07166	OLZ up vs VEH	0.10717	1	0.999678	0.896037	-1.11602	PCP+OLZ down vs PCP	0.904381	1	0.999419	1.00795	1.00795	PCP up vs VEH
38993_r_at	TGOLN2	trans-golgi network protein 2	NM_006464	0.0194103	1	0.739258	0.0500034	1	0.999954	1.13034	1.13034	AHA up vs VEH	0.734794	1	0.901978	0.978859	-1.0216	AOL down vs VEH	0.00701965	1	0.514474	1.18828	1.18828	HAL up vs VEH	0.836223	1	0.999992	1.01268	1.01268	OLZ up vs VEH	0.872203	1	0.999678	1.01037	1.01037	PCP+OLZ up vs PCP	0.958999	1	0.999419	0.996761	-1.00325	PCP down vs VEH
35632_at	CBLB	Cas-Br-M (murine) ecotropic retroviral transforming sequence b	NM_170662	0.019455	1	0.739258	0.22147	1	0.999954	1.06719	1.06719	AHA up vs VEH	0.339895	1	0.81859	1.0537	1.0537	AOL up vs VEH	0.0012161	1	0.514474	1.20073	1.20073	HAL up vs VEH	0.821181	1	0.999992	1.01198	1.01198	OLZ up vs VEH	0.350344	1	0.999678	0.949253	-1.05346	PCP+OLZ down vs PCP	0.255915	1	0.999419	1.06449	1.06449	PCP up vs VEH
35824_at	ZNF238	zinc finger protein 238	NM_006352 /// NM_205768	0.019683	1	0.739258	0.533093	1	0.999954	1.04349	1.04349	AHA up vs VEH	0.246585	1	0.81859	0.920903	-1.08589	AOL down vs VEH	0.153634	1	0.514474	1.10355	1.10355	HAL up vs VEH	0.215886	1	0.999992	1.08891	1.08891	OLZ up vs VEH	0.878708	1	0.999678	1.01101	1.01101	PCP+OLZ up vs PCP	0.165481	1	0.999419	0.90563	-1.1042	PCP down vs VEH
37287_at	NRCAM	neuronal cell adhesion molecule	NM_001037132 /// NM_001037133 /// NM_005010	0.0197662	1	0.739258	0.15792	1	0.999954	0.889441	-1.1243	AHA down vs VEH	0.127771	1	0.81859	0.877205	-1.13998	AOL down vs VEH	0.519418	1	0.639727	1.05432	1.05432	HAL up vs VEH	0.991337	1	0.999992	1.00089	1.00089	OLZ up vs VEH	0.0106896	1	0.999678	1.25851	1.25851	PCP+OLZ up vs PCP	0.00604883	1	0.999419	0.782743	-1.27756	PCP down vs VEH
818_s_at	ATRX	alpha thalassemia/mental retardation syndrome X-linked (RAD54 homolog, S. cerevi	NM_000489 /// NM_138270	0.0198322	1	0.739258	0.752077	1	0.999954	1.01979	1.01979	AHA up vs VEH	0.410971	1	0.819966	0.948396	-1.05441	AOL down vs VEH	0.0144902	1	0.514474	1.17097	1.17097	HAL up vs VEH	0.67613	1	0.999992	1.02627	1.02627	OLZ up vs VEH	0.481539	1	0.999678	1.04718	1.04718	PCP+OLZ up vs PCP	0.240533	1	0.999419	0.926748	-1.07904	PCP down vs VEH
37729_at	XPO1	exportin 1 (CRM1 homolog, yeast)	NM_003400	0.0198898	1	0.739258	0.0938656	1	0.999954	1.12016	1.12016	AHA up vs VEH	0.415956	1	0.819966	0.945361	-1.0578	AOL down vs VEH	0.00849629	1	0.514474	1.20118	1.20118	HAL up vs VEH	0.228762	1	0.999992	1.08413	1.08413	OLZ up vs VEH	0.747345	1	0.999678	1.02282	1.02282	PCP+OLZ up vs PCP	0.870211	1	0.999419	0.988812	-1.01131	PCP down vs VEH
34355_at	MECP2	methyl CpG binding protein 2 (Rett syndrome)	NM_001110792 /// NM_004992	0.0199871	1	0.739258	0.539639	1	0.999954	1.03848	1.03848	AHA up vs VEH	0.082472	1	0.81859	0.893532	-1.11915	AOL down vs VEH	0.052844	1	0.514474	1.12967	1.12967	HAL up vs VEH	0.411587	1	0.999992	1.05195	1.05195	OLZ up vs VEH	0.882563	1	0.999678	1.0096	1.0096	PCP+OLZ up vs PCP	0.429241	1	0.999419	0.950766	-1.05178	PCP down vs VEH
1659_s_at	RHEB	Ras homolog enriched in brain	NM_005614	0.0200118	1	0.739258	0.867091	1	0.999954	0.988337	-1.0118	AHA down vs VEH	0.107234	1	0.81859	0.887951	-1.12619	AOL down vs VEH	0.100587	1	0.514474	1.12432	1.12432	HAL up vs VEH	0.703169	1	0.999992	1.02709	1.02709	OLZ up vs VEH	0.0820196	1	0.999678	1.13991	1.13991	PCP+OLZ up vs PCP	0.0459875	1	0.999419	0.861761	-1.16041	PCP down vs VEH
1675_at	RASA1	RAS p21 protein activator (GTPase activating protein) 1	NM_002890 /// NM_022650	0.0200858	1	0.739258	0.281093	1	0.999954	0.934317	-1.0703	AHA down vs VEH	0.247367	1	0.81859	0.927258	-1.07845	AOL down vs VEH	0.124137	1	0.514474	1.10264	1.10264	HAL up vs VEH	0.637921	1	0.999992	0.970953	-1.02992	OLZ down vs VEH	0.0131151	1	0.999678	1.18562	1.18562	PCP+OLZ up vs PCP	0.0359762	1	0.999419	0.869418	-1.15019	PCP down vs VEH
458_at	CCR6	chemokine (C-C motif) receptor 6	NM_004367 /// NM_031409	0.0204734	1	0.741184	0.889144	1	0.999954	1.00596	1.00596	AHA up vs VEH	0.0679254	1	0.81859	0.920948	-1.08584	AOL down vs VEH	0.113252	1	0.514474	1.07109	1.07109	HAL up vs VEH	0.382644	1	0.999992	0.963275	-1.03813	OLZ down vs VEH	0.0367667	1	0.999678	1.10135	1.10135	PCP+OLZ up vs PCP	0.180541	1	0.999419	0.941902	-1.06168	PCP down vs VEH
32175_at	2010-09-07	septin 7	NM_001011553 /// NM_001788	0.0207164	1	0.741184	0.783245	1	0.999954	1.01534	1.01534	AHA up vs VEH	0.113196	1	0.81859	0.911934	-1.09657	AOL down vs VEH	0.0804503	1	0.514474	1.10373	1.10373	HAL up vs VEH	0.122389	1	0.999992	1.09071	1.09071	OLZ up vs VEH	0.236082	1	0.999678	1.07214	1.07214	PCP+OLZ up vs PCP	0.268819	1	0.999419	0.938122	-1.06596	PCP down vs VEH
36544_at	ARL3	ADP-ribosylation factor-like 3	NM_004311	0.02113	1	0.741184	0.47574	1	0.999954	1.03988	1.03988	AHA up vs VEH	0.9725	1	0.990511	0.998053	-1.00195	AOL down vs VEH	0.0101665	1	0.514474	1.15818	1.15818	HAL up vs VEH	0.0883127	1	0.999992	1.09962	1.09962	OLZ up vs VEH	0.881086	1	0.999678	1.00865	1.00865	PCP+OLZ up vs PCP	0.576687	1	0.999419	0.968834	-1.03217	PCP down vs VEH
39790_at	ATP2A2	ATPase, Ca++ transporting, cardiac muscle, slow twitch 2	NM_001135765 /// NM_001681 /// NM_170665	0.021194	1	0.741184	0.731786	1	0.999954	1.01955	1.01955	AHA up vs VEH	0.341914	1	0.81859	0.945708	-1.05741	AOL down vs VEH	0.0140844	1	0.514474	1.15522	1.15522	HAL up vs VEH	0.491193	1	0.999992	1.03974	1.03974	OLZ up vs VEH	0.789026	1	0.999678	1.01603	1.01603	PCP+OLZ up vs PCP	0.411568	1	0.999419	0.952934	-1.04939	PCP down vs VEH
41223_at	COX5A	cytochrome c oxidase subunit Va	NM_004255	0.0212605	1	0.741184	0.220498	1	0.999954	1.07758	1.07758	AHA up vs VEH	0.741621	1	0.902616	0.9796	-1.02082	AOL down vs VEH	0.0111253	1	0.514474	1.17362	1.17362	HAL up vs VEH	0.10968	1	0.999992	1.10324	1.10324	OLZ up vs VEH	0.051905	1	0.999678	1.13513	1.13513	PCP+OLZ up vs PCP	0.31024	1	0.999419	0.938104	-1.06598	PCP down vs VEH
38738_at	SUMO3	SMT3 suppressor of mif two 3 homolog 3 (S. cerevisiae)	NM_006936	0.0214962	1	0.741184	0.500514	1	0.999954	0.953681	-1.04857	AHA down vs VEH	0.570142	1	0.843825	0.959521	-1.04219	AOL down vs VEH	0.0522286	1	0.514474	1.14997	1.14997	HAL up vs VEH	0.634623	1	0.999992	1.03397	1.03397	OLZ up vs VEH	0.576349	1	0.999678	1.04224	1.04224	PCP+OLZ up vs PCP	0.106115	1	0.999419	0.887331	-1.12698	PCP down vs VEH
32099_at	SAFB2	scaffold attachment factor B2	NM_014649	0.0215787	1	0.741184	0.70804	1	0.999954	0.973348	-1.02738	AHA down vs VEH	0.00499781	1	0.81859	0.801903	-1.24703	AOL down vs VEH	0.762536	1	0.815491	1.02203	1.02203	HAL up vs VEH	0.93258	1	0.999992	0.993921	-1.00612	OLZ down vs VEH	0.787565	1	0.999678	1.02067	1.02067	PCP+OLZ up vs PCP	0.0711471	1	0.999419	0.871387	-1.1476	PCP down vs VEH
39079_at	ERH	enhancer of rudimentary homolog (Drosophila)	NM_004450	0.0219922	1	0.741184	0.999647	1	0.999954	0.99997	-1.00003	AHA down vs VEH	0.308181	1	0.81859	0.929607	-1.07572	AOL down vs VEH	0.0993198	1	0.514474	1.12232	1.12232	HAL up vs VEH	0.153984	1	0.999992	1.10446	1.10446	OLZ up vs VEH	0.209916	1	0.999678	1.09606	1.09606	PCP+OLZ up vs PCP	0.0940748	1	0.999419	0.885598	-1.12918	PCP down vs VEH
35373_at	PIK3R1	phosphoinositide-3-kinase, regulatory subunit 1 (alpha)	NM_181504 /// NM_181523 /// NM_181524	0.0220207	1	0.741184	0.428102	1	0.999954	1.0451	1.0451	AHA up vs VEH	0.185808	1	0.81859	0.926105	-1.07979	AOL down vs VEH	0.168751	1	0.514474	1.08032	1.08032	HAL up vs VEH	0.275193	1	0.999992	1.06286	1.06286	OLZ up vs VEH	0.585739	1	0.999678	1.03238	1.03238	PCP+OLZ up vs PCP	0.126861	1	0.999419	0.914826	-1.0931	PCP down vs VEH
38999_s_at	NMT1	N-myristoyltransferase 1	NM_021079	0.0221229	1	0.741184	0.330381	1	0.999954	0.926686	-1.07911	AHA down vs VEH	0.404968	1	0.819966	0.93493	-1.0696	AOL down vs VEH	0.170273	1	0.514474	1.11399	1.11399	HAL up vs VEH	0.583236	1	0.999992	1.04366	1.04366	OLZ up vs VEH	0.940242	1	0.999678	1.00615	1.00615	PCP+OLZ up vs PCP	0.0844291	1	0.999419	0.86786	-1.15226	PCP down vs VEH
32695_at	HTATSF1	HIV-1 Tat specific factor 1	NM_001163280 /// NM_014500	0.0225961	1	0.741184	0.650294	1	0.999954	1.02738	1.02738	AHA up vs VEH	0.218071	1	0.81859	0.926275	-1.07959	AOL down vs VEH	0.082377	1	0.514474	1.11122	1.11122	HAL up vs VEH	0.225829	1	0.999992	1.07548	1.07548	OLZ up vs VEH	0.823269	1	0.999678	1.01409	1.01409	PCP+OLZ up vs PCP	0.23664	1	0.999419	0.929034	-1.07639	PCP down vs VEH
38114_at	RAD21	RAD21 homolog (S. pombe)	NM_006265	0.0227358	1	0.741184	0.711818	1	0.999954	1.02298	1.02298	AHA up vs VEH	0.0357569	1	0.81859	0.871527	-1.14741	AOL down vs VEH	0.199354	1	0.514474	1.08301	1.08301	HAL up vs VEH	0.718759	1	0.999992	0.978094	-1.0224	OLZ down vs VEH	0.852478	1	0.999678	1.01211	1.01211	PCP+OLZ up vs PCP	0.142152	1	0.999419	0.90957	-1.09942	PCP down vs VEH
31504_at	HDLBP	high density lipoprotein binding protein	NM_005336 /// NM_203346	0.0228093	1	0.741184	0.377602	1	0.999954	1.04867	1.04867	AHA up vs VEH	0.0514087	1	0.81859	0.895149	-1.11713	AOL down vs VEH	0.076274	1	0.514474	1.10186	1.10186	HAL up vs VEH	0.786289	1	0.999992	0.985571	-1.01464	OLZ down vs VEH	0.161341	1	0.999678	1.08334	1.08334	PCP+OLZ up vs PCP	0.459396	1	0.999419	0.959632	-1.04207	PCP down vs VEH
40483_at	C1orf61	chromosome 1 open reading frame 61	NM_006365	0.0228542	1	0.741184	0.935893	1	0.999954	1.00485	1.00485	AHA up vs VEH	0.00714858	1	0.81859	0.838808	-1.19217	AOL down vs VEH	0.481184	1	0.61551	0.958382	-1.04343	HAL down vs VEH	0.57471	1	0.999992	0.966743	-1.0344	OLZ down vs VEH	0.0357773	1	0.999678	1.14677	1.14677	PCP+OLZ up vs PCP	0.00916638	1	0.999419	0.843705	-1.18525	PCP down vs VEH
36899_at	SATB1	SATB homeobox 1	NM_001131010 /// NM_002971	0.0234471	1	0.741184	0.191105	1	0.999954	1.08399	1.08399	AHA up vs VEH	0.0338384	1	0.81859	0.871097	-1.14798	AOL down vs VEH	0.59145	1	0.687792	1.03334	1.03334	HAL up vs VEH	0.442684	1	0.999992	1.04812	1.04812	OLZ up vs VEH	0.104014	1	0.999678	0.899202	-1.1121	PCP+OLZ down vs PCP	0.384298	1	0.999419	1.05679	1.05679	PCP up vs VEH
40211_at	HNRNPA1	heterogeneous nuclear ribonucleoprotein A1	NM_002136 /// NM_031157	0.0236998	1	0.741184	0.2074	1	0.999954	0.911176	-1.09748	AHA down vs VEH	0.0289029	1	0.81859	0.843333	-1.18577	AOL down vs VEH	0.739672	1	0.798848	1.02457	1.02457	HAL up vs VEH	0.996255	1	0.999992	1.00034	1.00034	OLZ up vs VEH	0.160713	1	0.999678	1.11543	1.11543	PCP+OLZ up vs PCP	0.00880291	1	0.999419	0.812639	-1.23056	PCP down vs VEH
39850_at	ANK2	ankyrin 2, neuronal	NM_001127493 /// NM_001148 /// NM_020977	0.0238311	1	0.741184	0.13094	1	0.999954	0.90353	-1.10677	AHA down vs VEH	0.0171942	1	0.81859	0.844168	-1.1846	AOL down vs VEH	0.282627	1	0.528348	1.07425	1.07425	HAL up vs VEH	0.253722	1	0.999992	0.92667	-1.07913	OLZ down vs VEH	0.319489	1	0.999678	1.07228	1.07228	PCP+OLZ up vs PCP	0.0927448	1	0.999419	0.889251	-1.12454	PCP down vs VEH
40403_at	MYOC	myocilin, trabecular meshwork inducible glucocorticoid response	NM_000261	0.0238946	1	0.741184	0.596456	1	0.999954	1.03149	1.03149	AHA up vs VEH	0.226588	1	0.81859	0.928826	-1.07663	AOL down vs VEH	0.766629	1	0.819154	0.982793	-1.01751	HAL down vs VEH	0.20293	1	0.999992	0.927534	-1.07813	OLZ down vs VEH	0.482485	1	0.999678	0.957568	-1.04431	PCP+OLZ down vs PCP	0.0549402	1	0.999419	0.887724	-1.12648	PCP down vs VEH
35278_at	RPS29	ribosomal protein S29	NM_001030001 /// NM_001032	0.0239289	1	0.741184	0.62394	1	0.999954	1.0259	1.0259	AHA up vs VEH	0.428286	1	0.819966	0.958059	-1.04378	AOL down vs VEH	0.0255971	1	0.514474	1.1277	1.1277	HAL up vs VEH	0.842263	1	0.999992	1.01042	1.01042	OLZ up vs VEH	0.10925	1	0.999678	1.09342	1.09342	PCP+OLZ up vs PCP	0.106733	1	0.999419	0.915293	-1.09255	PCP down vs VEH
183_at	MAP2	microtubule-associated protein 2	NM_001039538 /// NM_002374 /// NM_031845 /// NM_031847	0.0242527	1	0.741184	0.0567236	1	0.999954	0.857694	-1.16592	AHA down vs VEH	0.775185	1	0.913626	0.977023	-1.02352	AOL down vs VEH	0.970212	1	0.978389	1.00294	1.00294	HAL up vs VEH	0.239204	1	0.999992	0.910829	-1.0979	OLZ down vs VEH	0.00302925	1	0.999678	1.29757	1.29757	PCP+OLZ up vs PCP	0.0112106	1	0.999419	0.805989	-1.24071	PCP down vs VEH
165_g_at	GNB3	guanine nucleotide binding protein (G protein), beta polypeptide 3	NM_002075	0.0242753	1	0.741184	0.779029	1	0.999954	0.98501	-1.01522	AHA down vs VEH	0.00744405	1	0.81859	0.855254	-1.16924	AOL down vs VEH	0.583726	1	0.6829	1.02998	1.02998	HAL up vs VEH	0.776603	1	0.999992	1.01539	1.01539	OLZ up vs VEH	0.371722	1	0.999678	1.05218	1.05218	PCP+OLZ up vs PCP	0.0785744	1	0.999419	0.90477	-1.10525	PCP down vs VEH
41669_at	ZCCHC11	zinc finger, CCHC domain containing 11	NM_001009881 /// NM_001009882 /// NM_015269	0.0243887	1	0.741184	0.356277	1	0.999954	0.945142	-1.05804	AHA down vs VEH	0.019954	1	0.81859	0.859108	-1.164	AOL down vs VEH	0.732451	1	0.793579	1.02102	1.02102	HAL up vs VEH	0.0558386	1	0.999992	0.887645	-1.12658	OLZ down vs VEH	0.257494	1	0.999678	1.07586	1.07586	PCP+OLZ up vs PCP	0.00987382	1	0.999419	0.843669	-1.1853	PCP down vs VEH
39733_at	HERPUD1	homocysteine-inducible, endoplasmic reticulum stress-inducible, ubiquitin-like d	NM_001010989 /// NM_001010990 /// NM_014685	0.0245764	1	0.741184	0.127417	1	0.999954	1.10393	1.10393	AHA up vs VEH	0.204995	1	0.81859	0.918838	-1.08833	AOL down vs VEH	0.159218	1	0.514474	1.09538	1.09538	HAL up vs VEH	0.472397	1	0.999992	1.04713	1.04713	OLZ up vs VEH	0.13941	1	0.999678	1.1061	1.1061	PCP+OLZ up vs PCP	0.111192	1	0.999419	0.898378	-1.11312	PCP down vs VEH
1368_at	IL1R1	interleukin 1 receptor, type I	NM_000877	0.0246306	1	0.741184	0.155335	1	0.999954	1.097	1.097	AHA up vs VEH	0.426755	1	0.819966	0.948309	-1.05451	AOL down vs VEH	0.0247488	1	0.514474	1.16102	1.16102	HAL up vs VEH	0.81007	1	0.999992	0.984665	-1.01557	OLZ down vs VEH	0.529636	1	0.999678	0.958247	-1.04357	PCP+OLZ down vs PCP	0.908676	1	0.999419	0.992392	-1.00767	PCP down vs VEH
39070_at	FSCN1	fascin homolog 1, actin-bundling protein (Strongylocentrotus purpuratus)	NM_003088	0.0247265	1	0.741184	0.676483	1	0.999954	0.973034	-1.02771	AHA down vs VEH	0.0307968	1	0.81859	0.859963	-1.16284	AOL down vs VEH	0.784393	1	0.833297	1.01807	1.01807	HAL up vs VEH	0.546172	1	0.999992	1.04038	1.04038	OLZ up vs VEH	0.167149	1	0.999678	1.10119	1.10119	PCP+OLZ up vs PCP	0.0178901	1	0.999419	0.846487	-1.18135	PCP down vs VEH
39860_at	FUBP1	far upstream element (FUSE) binding protein 1	NM_003902	0.0249723	1	0.741184	0.336527	1	0.999954	0.94603	-1.05705	AHA down vs VEH	0.197892	1	0.81859	0.925629	-1.08035	AOL down vs VEH	0.0753259	1	0.514474	1.10985	1.10985	HAL up vs VEH	0.20444	1	0.999992	0.929046	-1.07637	OLZ down vs VEH	0.567661	1	0.999678	1.0352	1.0352	PCP+OLZ up vs PCP	0.152026	1	0.999419	0.91732	-1.09013	PCP down vs VEH
35816_at	CSTB	cystatin B (stefin B)	NM_000100	0.0250541	1	0.741184	0.4248	1	0.999954	1.05967	1.05967	AHA up vs VEH	0.277515	1	0.81859	0.921381	-1.08533	AOL down vs VEH	0.0673037	1	0.514474	1.14489	1.14489	HAL up vs VEH	0.669674	1	0.999992	1.03137	1.03137	OLZ up vs VEH	0.384244	1	0.999678	1.06884	1.06884	PCP+OLZ up vs PCP	0.109817	1	0.999419	0.885302	-1.12956	PCP down vs VEH
32260_at	PEA15	phosphoprotein enriched in astrocytes 15	NM_003768	0.0251264	1	0.741184	0.473726	1	0.999954	1.03895	1.03895	AHA up vs VEH	0.192057	1	0.81859	1.07526	1.07526	AOL up vs VEH	0.00840544	1	0.514474	1.15814	1.15814	HAL up vs VEH	0.0546418	1	0.999992	1.1104	1.1104	OLZ up vs VEH	0.212838	1	0.999678	0.931974	-1.07299	PCP+OLZ down vs PCP	0.506056	1	0.999419	1.0374	1.0374	PCP up vs VEH
37585_at	SNRPA1	small nuclear ribonucleoprotein polypeptide A'	NM_003090	0.02514	1	0.741184	0.664675	1	0.999954	1.02298	1.02298	AHA up vs VEH	0.116537	1	0.81859	0.917217	-1.09025	AOL down vs VEH	0.0721442	1	0.514474	1.10097	1.10097	HAL up vs VEH	0.935192	1	0.999992	1.00427	1.00427	OLZ up vs VEH	0.0213146	1	0.999678	1.14054	1.14054	PCP+OLZ up vs PCP	0.211463	1	0.999419	0.933832	-1.07086	PCP down vs VEH
918_at	ABCA2	ATP-binding cassette, sub-family A (ABC1), member 2	NM_001606 /// NM_212533	0.025299	1	0.741184	0.120219	1	0.999954	0.909442	-1.09958	AHA down vs VEH	0.0437264	1	0.81859	0.879071	-1.13756	AOL down vs VEH	0.0847681	1	0.514474	0.899701	-1.11148	HAL down vs VEH	0.104824	1	0.999992	0.905539	-1.10432	OLZ down vs VEH	0.00854869	1	0.999678	1.1905	1.1905	PCP+OLZ up vs PCP	0.000332489	1	0.309501	0.783491	-1.27634	PCP down vs VEH
38003_s_at	DGKZ	diacylglycerol kinase, zeta 104kDa	NM_001105540 /// NM_003646 /// NM_201532 /// NM_201533	0.0254085	1	0.741184	0.331813	1	0.999954	1.0624	1.0624	AHA up vs VEH	0.263108	1	0.81859	0.930192	-1.07505	AOL down vs VEH	0.341132	1	0.551642	1.06116	1.06116	HAL up vs VEH	0.0791553	1	0.999992	1.11749	1.11749	OLZ up vs VEH	0.396745	1	0.999678	1.05714	1.05714	PCP+OLZ up vs PCP	0.149333	1	0.999419	0.910408	-1.09841	PCP down vs VEH
37568_at	GRM5	glutamate receptor, metabotropic 5	NM_000842 /// NM_001143831	0.0254975	1	0.741184	0.431523	1	0.999954	1.05594	1.05594	AHA up vs VEH	0.0778011	1	0.81859	0.879514	-1.13699	AOL down vs VEH	0.132471	1	0.514474	1.111	1.111	HAL up vs VEH	0.897237	1	0.999992	1.00894	1.00894	OLZ up vs VEH	0.354069	1	0.999678	1.06996	1.06996	PCP+OLZ up vs PCP	0.118105	1	0.999419	0.892808	-1.12006	PCP down vs VEH
1752_at	CALR	calreticulin	NM_004343	0.0259268	1	0.741184	0.76602	1	0.999954	0.979519	-1.02091	AHA down vs VEH	0.0104052	1	0.81859	0.824847	-1.21235	AOL down vs VEH	0.759517	1	0.812972	1.02152	1.02152	HAL up vs VEH	0.93949	1	0.999992	1.00529	1.00529	OLZ up vs VEH	0.193024	1	0.999678	1.10112	1.10112	PCP+OLZ up vs PCP	0.0253055	1	0.999419	0.846614	-1.18118	PCP down vs VEH
33907_at	EIF4G3	eukaryotic translation initiation factor 4 gamma, 3	NM_003760	0.0260663	1	0.741184	0.961569	1	0.999954	1.00327	1.00327	AHA up vs VEH	0.0481185	1	0.81859	0.867326	-1.15297	AOL down vs VEH	0.210309	1	0.514474	1.08964	1.08964	HAL up vs VEH	0.602401	1	0.999992	1.03603	1.03603	OLZ up vs VEH	0.950398	1	0.999678	1.00445	1.00445	PCP+OLZ up vs PCP	0.174801	1	0.999419	0.90802	-1.1013	PCP down vs VEH
39594_f_at	MT1H	metallothionein 1H	NM_005951	0.0262688	1	0.741184	0.135613	1	0.999954	1.07805	1.07805	AHA up vs VEH	0.529214	1	0.830959	1.03291	1.03291	AOL up vs VEH	0.00713676	1	0.514474	1.15048	1.15048	HAL up vs VEH	0.774675	1	0.999992	1.01431	1.01431	OLZ up vs VEH	0.121316	1	0.999678	1.08572	1.08572	PCP+OLZ up vs PCP	0.342654	1	0.999419	0.952124	-1.05028	PCP down vs VEH
32543_at	CALR	calreticulin	NM_004343	0.0265581	1	0.741184	0.31019	1	0.999954	1.06029	1.06029	AHA up vs VEH	0.156549	1	0.81859	0.918414	-1.08883	AOL down vs VEH	0.0588429	1	0.514474	1.11724	1.11724	HAL up vs VEH	0.423077	1	0.999992	1.04717	1.04717	OLZ up vs VEH	0.425528	1	0.999678	1.04945	1.04945	PCP+OLZ up vs PCP	0.254886	1	0.999419	0.934124	-1.07052	PCP down vs VEH
40962_s_at	SMARCA2	SWI/SNF related, matrix associated, actin dependent regulator of chromatin, subf	NM_003070 /// NM_139045	0.0266367	1	0.741184	0.469583	1	0.999954	1.05283	1.05283	AHA up vs VEH	0.422343	1	0.819966	0.94257	-1.06093	AOL down vs VEH	0.095211	1	0.514474	1.12817	1.12817	HAL up vs VEH	0.199285	1	0.999992	1.09644	1.09644	OLZ up vs VEH	0.131833	1	0.999678	1.12106	1.12106	PCP+OLZ up vs PCP	0.0796456	1	0.999419	0.876806	-1.1405	PCP down vs VEH
1716_at	KSR1	kinase suppressor of ras 1	NM_014238	0.0267701	1	0.741184	0.95666	1	0.999954	0.996742	-1.00327	AHA down vs VEH	0.1441	1	0.81859	0.912072	-1.0964	AOL down vs VEH	0.152712	1	0.514474	1.09094	1.09094	HAL up vs VEH	0.817342	1	0.999992	0.986224	-1.01397	OLZ down vs VEH	0.0864746	1	0.999678	1.11686	1.11686	PCP+OLZ up vs PCP	0.0243124	1	0.999419	0.865097	-1.15594	PCP down vs VEH
31608_g_at	VDAC1	voltage-dependent anion channel 1	NM_003374	0.026797	1	0.741184	0.958133	1	0.999954	0.997287	-1.00272	AHA down vs VEH	0.0264049	1	0.81859	0.884395	-1.13072	AOL down vs VEH	0.699426	1	0.767627	1.0202	1.0202	HAL up vs VEH	0.353002	1	0.999992	0.952817	-1.04952	OLZ down vs VEH	0.0220809	1	0.999678	1.13788	1.13788	PCP+OLZ up vs PCP	0.0101333	1	0.999419	0.86582	-1.15497	PCP down vs VEH
31722_at	RPL3	ribosomal protein L3	NM_000967 /// NM_001033853	0.0268395	1	0.741184	0.549266	1	0.999954	1.03497	1.03497	AHA up vs VEH	0.784594	1	0.916599	0.983929	-1.01633	AOL down vs VEH	0.0853521	1	0.514474	1.10571	1.10571	HAL up vs VEH	0.104737	1	0.999992	1.09916	1.09916	OLZ up vs VEH	0.0383077	1	0.999678	1.13717	1.13717	PCP+OLZ up vs PCP	0.0732807	1	0.999419	0.897148	-1.11464	PCP down vs VEH
39388_at	CAMK2G	calcium/calmodulin-dependent protein kinase II gamma	NM_001222 /// NM_172169 /// NM_172170 /// NM_172171 /// NM_172173	0.0268514	1	0.741184	0.777956	1	0.999954	0.984895	-1.01534	AHA down vs VEH	0.177912	1	0.81859	0.926716	-1.07908	AOL down vs VEH	0.201955	1	0.514474	1.07207	1.07207	HAL up vs VEH	0.366928	1	0.999992	1.05016	1.05016	OLZ up vs VEH	0.0299425	1	0.999678	1.13572	1.13572	PCP+OLZ up vs PCP	0.0339075	1	0.999419	0.885008	-1.12993	PCP down vs VEH
39791_at	ATP2A2	ATPase, Ca++ transporting, cardiac muscle, slow twitch 2	NM_001135765 /// NM_001681 /// NM_170665	0.0270229	1	0.741184	0.366895	1	0.999954	0.939718	-1.06415	AHA down vs VEH	0.058269	1	0.81859	0.871502	-1.14744	AOL down vs VEH	0.343304	1	0.552409	1.06752	1.06752	HAL up vs VEH	0.5374	1	0.999992	0.958509	-1.04329	OLZ down vs VEH	0.0452929	1	0.999678	1.15996	1.15996	PCP+OLZ up vs PCP	0.0116155	1	0.999419	0.829444	-1.20563	PCP down vs VEH
36687_at	COX7B	cytochrome c oxidase subunit VIIb	NM_001866	0.0271304	1	0.741184	0.708245	1	0.999954	1.02325	1.02325	AHA up vs VEH	0.161057	1	0.81859	0.913797	-1.09433	AOL down vs VEH	0.08945	1	0.514474	1.11209	1.11209	HAL up vs VEH	0.320592	1	0.999992	1.06327	1.06327	OLZ up vs VEH	0.820364	1	0.999678	1.01478	1.01478	PCP+OLZ up vs PCP	0.240904	1	0.999419	0.927542	-1.07812	PCP down vs VEH
39572_at	GRIK2	glutamate receptor, ionotropic, kainate 2	NM_021956 /// NM_175768	0.0273116	1	0.741184	0.858131	1	0.999954	0.990892	-1.00919	AHA down vs VEH	0.163174	1	0.81859	0.927934	-1.07766	AOL down vs VEH	0.377402	1	0.562928	1.04645	1.04645	HAL up vs VEH	0.640958	1	0.999992	1.02419	1.02419	OLZ up vs VEH	0.892807	1	0.999678	1.00729	1.00729	PCP+OLZ up vs PCP	0.0530936	1	0.999419	0.900215	-1.11085	PCP down vs VEH
273_g_at	GRP	gastrin-releasing peptide	NM_001012512 /// NM_001012513 /// NM_002091	0.0275747	1	0.741184	0.30975	1	0.999954	1.07087	1.07087	AHA up vs VEH	0.382109	1	0.81859	1.06274	1.06274	AOL up vs VEH	0.0275071	1	0.514474	1.16471	1.16471	HAL up vs VEH	0.0487409	1	0.999992	1.14503	1.14503	OLZ up vs VEH	0.52264	1	0.999678	0.955822	-1.04622	PCP+OLZ down vs PCP	0.862453	1	0.999419	0.988056	-1.01209	PCP down vs VEH
36926_at	MAPK6	mitogen-activated protein kinase 6	NM_002748	0.0276095	1	0.741184	0.48319	1	0.999954	1.05309	1.05309	AHA up vs VEH	0.152474	1	0.81859	0.895517	-1.11667	AOL down vs VEH	0.0807273	1	0.514474	1.14005	1.14005	HAL up vs VEH	0.525705	1	0.999992	1.0479	1.0479	OLZ up vs VEH	0.874356	1	0.999678	1.01232	1.01232	PCP+OLZ up vs PCP	0.259961	1	0.999419	0.917113	-1.09038	PCP down vs VEH
AFFX-HSAC07/X00351_3_at	ACTB	actin, beta	NM_001101	0.0276267	1	0.741184	0.21584	1	0.999954	1.07189	1.07189	AHA up vs VEH	0.0534417	1	0.81859	0.892475	-1.12048	AOL down vs VEH	0.308625	1	0.536392	1.05857	1.05857	HAL up vs VEH	0.256839	1	0.999992	1.06556	1.06556	OLZ up vs VEH	0.103892	1	0.999678	1.1016	1.1016	PCP+OLZ up vs PCP	0.301275	1	0.999419	0.941884	-1.0617	PCP down vs VEH
34281_at	VSNL1	visinin-like 1	NM_003385	0.0278815	1	0.741184	0.166622	1	0.999954	1.07022	1.07022	AHA up vs VEH	0.149576	1	0.81859	0.929387	-1.07598	AOL down vs VEH	0.0296431	1	0.514474	1.11489	1.11489	HAL up vs VEH	0.371661	1	0.999992	1.04447	1.04447	OLZ up vs VEH	0.396221	1	0.999678	1.04444	1.04444	PCP+OLZ up vs PCP	0.672841	1	0.999419	0.979012	-1.02144	PCP down vs VEH
924_s_at	PPP2CB	protein phosphatase 2 (formerly 2A), catalytic subunit, beta isoform	NM_001009552 /// NM_004156	0.0279088	1	0.741184	0.8121	1	0.999954	1.01442	1.01442	AHA up vs VEH	0.209442	1	0.81859	0.924049	-1.08219	AOL down vs VEH	0.135124	1	0.514474	1.09559	1.09559	HAL up vs VEH	0.89843	1	0.999992	0.992345	-1.00771	OLZ down vs VEH	0.982076	1	0.999678	1.00142	1.00142	PCP+OLZ up vs PCP	0.111392	1	0.999419	0.903977	-1.10622	PCP down vs VEH
35839_at	SQLE	squalene epoxidase	NM_003129	0.0281108	1	0.741184	0.177571	1	0.999954	1.07771	1.07771	AHA up vs VEH	0.708713	1	0.890482	1.02144	1.02144	AOL up vs VEH	0.0010215	1	0.514474	1.21389	1.21389	HAL up vs VEH	0.11115	1	0.999992	1.09291	1.09291	OLZ up vs VEH	0.390671	1	0.999678	0.951419	-1.05106	PCP+OLZ down vs PCP	0.138256	1	0.999419	1.08919	1.08919	PCP up vs VEH
1848_at	RAP1A	RAP1A, member of RAS oncogene family	NM_001010935 /// NM_002884	0.028261	1	0.741184	0.573124	1	0.999954	1.03433	1.03433	AHA up vs VEH	0.590686	1	0.852953	0.967226	-1.03388	AOL down vs VEH	0.0109093	1	0.514474	1.17228	1.17228	HAL up vs VEH	0.58774	1	0.999992	1.033	1.033	OLZ up vs VEH	0.367514	1	0.999678	1.05867	1.05867	PCP+OLZ up vs PCP	0.308864	1	0.999419	0.938537	-1.06549	PCP down vs VEH
32381_at	RORB	RAR-related orphan receptor B	NM_006914	0.02851	1	0.741184	0.0801019	1	0.999954	0.882555	-1.13307	AHA down vs VEH	0.0655082	1	0.81859	0.872556	-1.14606	AOL down vs VEH	0.24045	1	0.516024	0.920484	-1.08639	HAL down vs VEH	0.0439874	1	0.999992	0.865232	-1.15576	OLZ down vs VEH	0.0102861	1	0.999678	1.21839	1.21839	PCP+OLZ up vs PCP	0.000510889	1	0.313388	0.760823	-1.31437	PCP down vs VEH
589_at	SRD5A1	steroid-5-alpha-reductase, alpha polypeptide 1 (3-oxo-5 alpha-steroid delta 4-de	NM_001047	0.0285476	1	0.741184	0.214762	1	0.999954	1.07579	1.07579	AHA up vs VEH	0.600028	1	0.855093	0.968817	-1.03219	AOL down vs VEH	0.0574013	1	0.514474	1.12017	1.12017	HAL up vs VEH	0.178828	1	0.999992	1.08254	1.08254	OLZ up vs VEH	0.93494	1	0.999678	1.00502	1.00502	PCP+OLZ up vs PCP	0.361108	1	0.999419	0.946066	-1.05701	PCP down vs VEH
41739_s_at	CALD1	caldesmon 1	NM_004342 /// NM_033138 /// NM_033139 /// NM_033140 /// NM_033157	0.0285494	1	0.741184	0.880516	1	0.999954	1.01006	1.01006	AHA up vs VEH	0.497098	1	0.824989	0.954184	-1.04802	AOL down vs VEH	0.0200012	1	0.514474	1.17417	1.17417	HAL up vs VEH	0.901419	1	0.999992	1.00828	1.00828	OLZ up vs VEH	0.595958	1	0.999678	0.963463	-1.03792	PCP+OLZ down vs PCP	0.572622	1	0.999419	0.961777	-1.03974	PCP down vs VEH
174_s_at	ITSN2	intersectin 2	NM_006277 /// NM_019595 /// NM_147152	0.0286039	1	0.741184	0.683022	1	0.999954	1.02665	1.02665	AHA up vs VEH	0.0209725	1	0.81859	0.852762	-1.17266	AOL down vs VEH	0.278365	1	0.52627	1.07282	1.07282	HAL up vs VEH	0.262008	1	0.999992	1.07549	1.07549	OLZ up vs VEH	0.897927	1	0.999678	0.991347	-1.00873	PCP+OLZ down vs PCP	0.723519	1	0.999419	0.976682	-1.02387	PCP down vs VEH
35679_s_at	DPP6	dipeptidyl-peptidase 6	NM_001039350 /// NM_001936 /// NM_130797	0.0288426	1	0.741184	0.587687	1	0.999954	1.02693	1.02693	AHA up vs VEH	0.48468	1	0.824989	0.965141	-1.03612	AOL down vs VEH	0.00374104	1	0.514474	1.16199	1.16199	HAL up vs VEH	0.184394	1	0.999992	1.06791	1.06791	OLZ up vs VEH	0.795303	1	0.999678	1.01346	1.01346	PCP+OLZ up vs PCP	0.482157	1	0.999419	1.03637	1.03637	PCP up vs VEH
616_s_at	THRA	thyroid hormone receptor, alpha (erythroblastic leukemia viral (v-erb-a) oncogen	NM_003250 /// NM_199334	0.0288839	1	0.741184	0.808827	1	0.999954	1.01268	1.01268	AHA up vs VEH	0.90314	1	0.963186	1.00658	1.00658	AOL up vs VEH	0.101268	1	0.514474	1.09074	1.09074	HAL up vs VEH	0.76966	1	0.999992	1.01537	1.01537	OLZ up vs VEH	0.00702911	1	0.999678	1.16786	1.16786	PCP+OLZ up vs PCP	0.0233617	1	0.999419	0.881119	-1.13492	PCP down vs VEH
32612_at	GSN	gelsolin (amyloidosis, Finnish type)	NM_000177 /// NM_001127662 /// NM_001127663 /// NM_001127664 /// NM_001127665 //	0.028891	1	0.741184	0.581973	1	0.999954	0.962662	-1.03879	AHA down vs VEH	0.0908311	1	0.81859	0.884244	-1.13091	AOL down vs VEH	0.67007	1	0.745906	0.971002	-1.02986	HAL down vs VEH	0.461542	1	0.999992	0.950299	-1.0523	OLZ down vs VEH	0.91775	1	0.999678	0.992527	-1.00753	PCP+OLZ down vs PCP	0.0108024	1	0.999419	0.826718	-1.2096	PCP down vs VEH
35638_at	RUNX1T1	runt-related transcription factor 1; translocated to, 1 (cyclin D-related)	NM_004349 /// NM_175634 /// NM_175635 /// NM_175636	0.0289974	1	0.741184	0.736998	1	0.999954	1.02076	1.02076	AHA up vs VEH	0.647814	1	0.867983	0.971475	-1.02936	AOL down vs VEH	0.295681	1	0.532544	1.06653	1.06653	HAL up vs VEH	0.710227	1	0.999992	1.023	1.023	OLZ up vs VEH	0.000603538	1	0.507066	1.27034	1.27034	PCP+OLZ up vs PCP	0.0466176	1	0.999419	0.878609	-1.13816	PCP down vs VEH
612_s_at	CNP	2',3'-cyclic nucleotide 3' phosphodiesterase	NM_033133	0.0290818	1	0.741184	0.515872	1	0.999954	0.961718	-1.03981	AHA down vs VEH	0.0190841	1	0.81859	0.860061	-1.16271	AOL down vs VEH	0.309043	1	0.536392	1.06329	1.06329	HAL up vs VEH	0.552538	1	0.999992	1.03631	1.03631	OLZ up vs VEH	0.220852	1	0.999678	1.08112	1.08112	PCP+OLZ up vs PCP	0.139703	1	0.999419	0.911203	-1.09745	PCP down vs VEH
39167_r_at	SERPINH1	serpin peptidase inhibitor, clade H (heat shock protein 47), member 1, (collagen	NM_001235	0.0291158	1	0.741184	0.778009	1	0.999954	1.01634	1.01634	AHA up vs VEH	0.019023	1	0.81859	0.865332	-1.15563	AOL down vs VEH	0.624098	1	0.70954	1.0286	1.0286	HAL up vs VEH	0.302531	1	0.999992	0.942091	-1.06147	OLZ down vs VEH	0.205244	1	0.999678	1.08052	1.08052	PCP+OLZ up vs PCP	0.0289429	1	0.999419	0.874408	-1.14363	PCP down vs VEH
41403_at	SNRPF	small nuclear ribonucleoprotein polypeptide F	NM_003095	0.0300682	1	0.741184	0.218753	1	0.999954	1.08367	1.08367	AHA up vs VEH	0.224378	1	0.81859	0.921171	-1.08557	AOL down vs VEH	0.090462	1	0.514474	1.11809	1.11809	HAL up vs VEH	0.536015	1	0.999992	1.04095	1.04095	OLZ up vs VEH	0.928442	1	0.999678	0.993903	-1.00613	PCP+OLZ down vs PCP	0.369865	1	0.999419	0.94139	-1.06226	PCP down vs VEH
1154_at	EIF2S1	eukaryotic translation initiation factor 2, subunit 1 alpha, 35kDa	NM_004094	0.0301341	1	0.741184	0.848424	1	0.999954	0.98778	-1.01237	AHA down vs VEH	0.115913	1	0.81859	0.899108	-1.11221	AOL down vs VEH	0.141152	1	0.514474	1.10078	1.10078	HAL up vs VEH	0.975331	1	0.999992	1.00199	1.00199	OLZ up vs VEH	0.523679	1	0.999678	1.04425	1.04425	PCP+OLZ up vs PCP	0.0707804	1	0.999419	0.884243	-1.13091	PCP down vs VEH
37489_s_at	SLC4A3	solute carrier family 4, anion exchanger, member 3	NM_005070 /// NM_201574	0.0302842	1	0.741184	0.0190275	1	0.999954	1.14112	1.14112	AHA up vs VEH	0.653646	1	0.869849	0.975098	-1.02554	AOL down vs VEH	0.0209031	1	0.514474	1.1387	1.1387	HAL up vs VEH	0.111351	1	0.999992	1.09183	1.09183	OLZ up vs VEH	0.682282	1	0.999678	1.02368	1.02368	PCP+OLZ up vs PCP	0.963717	1	0.999419	1.00256	1.00256	PCP up vs VEH
37184_at	STX1A	syntaxin 1A (brain)	NM_004603	0.0304782	1	0.741184	0.41345	1	0.999954	1.04289	1.04289	AHA up vs VEH	0.129352	1	0.81859	0.921775	-1.08486	AOL down vs VEH	0.0781929	1	0.514474	1.09628	1.09628	HAL up vs VEH	0.293476	1	0.999992	1.05559	1.05559	OLZ up vs VEH	0.11202	1	0.999678	1.09088	1.09088	PCP+OLZ up vs PCP	0.217341	1	0.999419	0.936148	-1.06821	PCP down vs VEH
38010_at	BNIP3	BCL2/adenovirus E1B 19kDa interacting protein 3	NM_004052	0.0305104	1	0.741184	0.392289	1	0.999954	1.05846	1.05846	AHA up vs VEH	0.770876	1	0.912991	1.02012	1.02012	AOL up vs VEH	0.00466678	1	0.514474	1.21821	1.21821	HAL up vs VEH	0.0332098	1	0.999992	1.15615	1.15615	OLZ up vs VEH	0.196782	1	0.999678	1.09507	1.09507	PCP+OLZ up vs PCP	0.793745	1	0.999419	0.982255	-1.01807	PCP down vs VEH
38580_at	GNAQ	guanine nucleotide binding protein (G protein), q polypeptide	NM_002072	0.0306823	1	0.741184	0.940509	1	0.999954	0.995411	-1.00461	AHA down vs VEH	0.7376	1	0.902111	0.978848	-1.02161	AOL down vs VEH	0.0576536	1	0.514474	1.12734	1.12734	HAL up vs VEH	0.629678	1	0.999992	0.970675	-1.03021	OLZ down vs VEH	0.149013	1	0.999678	1.0996	1.0996	PCP+OLZ up vs PCP	0.0511131	1	0.999419	0.88009	-1.13625	PCP down vs VEH
36654_s_at	HNRNPA2B1	heterogeneous nuclear ribonucleoprotein A2/B1	NM_002137 /// NM_031243	0.0308533	1	0.741184	0.342451	1	0.999954	0.923826	-1.08246	AHA down vs VEH	0.0560444	1	0.81859	0.845305	-1.18301	AOL down vs VEH	0.4716	1	0.609454	1.06176	1.06176	HAL up vs VEH	0.802706	1	0.999992	1.02095	1.02095	OLZ up vs VEH	0.113596	1	0.999678	1.15089	1.15089	PCP+OLZ up vs PCP	0.016852	1	0.999419	0.807824	-1.23789	PCP down vs VEH
33992_at	ALB	albumin	NM_000477	0.0308561	1	0.741184	0.41352	1	0.999954	1.04737	1.04737	AHA up vs VEH	0.669586	1	0.87612	0.975402	-1.02522	AOL down vs VEH	0.0245175	1	0.514474	1.14008	1.14008	HAL up vs VEH	0.307469	1	0.999992	0.94374	-1.05961	OLZ down vs VEH	0.208827	1	0.999678	0.927421	-1.07826	PCP+OLZ down vs PCP	0.446498	1	0.999419	1.04561	1.04561	PCP up vs VEH
1940_at	KRAS	v-Ki-ras2 Kirsten rat sarcoma viral oncogene homolog	NM_004985 /// NM_033360	0.0310376	1	0.741184	0.667414	1	0.999954	1.03024	1.03024	AHA up vs VEH	0.07636	1	0.81859	0.878382	-1.13846	AOL down vs VEH	0.279439	1	0.526473	1.07841	1.07841	HAL up vs VEH	0.217635	1	0.999992	1.09008	1.09008	OLZ up vs VEH	0.751926	1	0.999678	0.977201	-1.02333	PCP+OLZ down vs PCP	0.398761	1	0.999419	0.940998	-1.0627	PCP down vs VEH
40607_at	DPYSL2	dihydropyrimidinase-like 2	NM_001386	0.0312018	1	0.741184	0.406939	1	0.999954	0.947142	-1.05581	AHA down vs VEH	0.0168553	1	0.81859	0.845783	-1.18234	AOL down vs VEH	0.776403	1	0.826718	1.0187	1.0187	HAL up vs VEH	0.757344	1	0.999992	1.02036	1.02036	OLZ up vs VEH	0.152287	1	0.999678	1.10473	1.10473	PCP+OLZ up vs PCP	0.0228731	1	0.999419	0.852927	-1.17243	PCP down vs VEH
35048_at	GRIA3	glutamate receptor, ionotrophic, AMPA 3	NM_000828 /// NM_007325	0.0313821	1	0.741184	0.221573	1	0.999954	1.07168	1.07168	AHA up vs VEH	0.190031	1	0.81859	0.925987	-1.07993	AOL down vs VEH	0.752278	1	0.807808	1.01787	1.01787	HAL up vs VEH	0.0320594	1	0.999992	1.13197	1.13197	OLZ up vs VEH	0.39136	1	0.999678	1.05216	1.05216	PCP+OLZ up vs PCP	0.42808	1	0.999419	0.954837	-1.0473	PCP down vs VEH
38406_f_at	PTGDS	prostaglandin D2 synthase 21kDa (brain)	NM_000954	0.031391	1	0.741184	0.306397	1	0.999954	1.06098	1.06098	AHA up vs VEH	0.744529	1	0.903772	1.01958	1.01958	AOL up vs VEH	0.0993942	1	0.514474	1.10123	1.10123	HAL up vs VEH	0.272324	1	0.999992	1.06566	1.06566	OLZ up vs VEH	0.892354	1	0.999678	1.00822	1.00822	PCP+OLZ up vs PCP	0.196378	1	0.999419	0.925188	-1.08086	PCP down vs VEH
38194_s_at	IGK@ /// IGKC	immunoglobulin kappa locus /// immunoglobulin kappa constant	---	0.0314313	1	0.741184	0.119073	1	0.999954	1.11455	1.11455	AHA up vs VEH	0.341757	1	0.81859	0.934506	-1.07008	AOL down vs VEH	0.207359	1	0.514474	1.09115	1.09115	HAL up vs VEH	0.184777	1	0.999992	0.912236	-1.09621	OLZ down vs VEH	0.995433	1	0.999678	0.999588	-1.00041	PCP+OLZ down vs PCP	0.485571	1	0.999419	0.951605	-1.05086	PCP down vs VEH
33865_at	ZMYND11	zinc finger, MYND domain containing 11	NM_001161482 /// NM_006624 /// NM_212479	0.0316146	1	0.741184	0.743878	1	0.999954	0.976919	-1.02363	AHA down vs VEH	0.225409	1	0.81859	0.913512	-1.09468	AOL down vs VEH	0.266292	1	0.523225	1.08334	1.08334	HAL up vs VEH	0.858496	1	0.999992	1.01282	1.01282	OLZ up vs VEH	0.434197	1	0.999678	1.06082	1.06082	PCP+OLZ up vs PCP	0.0280161	1	0.999419	0.845451	-1.1828	PCP down vs VEH
36681_at	APOD	apolipoprotein D	NM_001647	0.0316588	1	0.741184	0.397512	1	0.999954	1.06249	1.06249	AHA up vs VEH	0.326963	1	0.81859	0.929806	-1.07549	AOL down vs VEH	0.0297527	1	0.514474	1.17348	1.17348	HAL up vs VEH	0.859533	1	0.999992	1.0127	1.0127	OLZ up vs VEH	0.882088	1	0.999678	0.988925	-1.0112	PCP+OLZ down vs PCP	0.478129	1	0.999419	0.948796	-1.05397	PCP down vs VEH
35825_s_at	ZNF238	zinc finger protein 238	NM_006352 /// NM_205768	0.0317296	1	0.741184	0.873096	1	0.999954	0.989479	-1.01063	AHA down vs VEH	0.446014	1	0.819966	0.948947	-1.0538	AOL down vs VEH	0.143174	1	0.514474	1.10333	1.10333	HAL up vs VEH	0.740703	1	0.999992	0.978313	-1.02217	OLZ down vs VEH	0.0103916	1	0.999678	1.20528	1.20528	PCP+OLZ up vs PCP	0.0195188	1	0.999419	0.846927	-1.18074	PCP down vs VEH
33657_at	RPL34	ribosomal protein L34	NM_000995 /// NM_033625	0.0318314	1	0.741184	0.108514	1	0.999954	1.09966	1.09966	AHA up vs VEH	0.951455	1	0.981617	0.996342	-1.00367	AOL down vs VEH	0.0241508	1	0.514474	1.14539	1.14539	HAL up vs VEH	0.0537609	1	0.999992	1.12193	1.12193	OLZ up vs VEH	0.417086	1	0.999678	1.05119	1.05119	PCP+OLZ up vs PCP	0.48784	1	0.999419	0.958927	-1.04283	PCP down vs VEH
32362_r_at	PI4KA /// TOP3B	phosphatidylinositol 4-kinase, catalytic, alpha /// topoisomerase (DNA) III beta	NM_002650 /// NM_003935 /// NM_058004	0.0320545	1	0.741184	0.810523	1	0.999954	1.01147	1.01147	AHA up vs VEH	0.0168662	1	0.81859	0.885028	-1.12991	AOL down vs VEH	0.333367	1	0.547508	1.04736	1.04736	HAL up vs VEH	0.435143	1	0.999992	0.963434	-1.03795	OLZ down vs VEH	0.112631	1	0.999678	1.0841	1.0841	PCP+OLZ up vs PCP	0.138312	1	0.999419	0.92862	-1.07687	PCP down vs VEH
32138_at	DNM1	dynamin 1	NM_001005336 /// NM_004408	0.0321541	1	0.741184	0.117623	1	0.999954	0.911321	-1.09731	AHA down vs VEH	0.0107055	1	0.81859	0.851233	-1.17477	AOL down vs VEH	0.865163	1	0.895593	0.990134	-1.00996	HAL down vs VEH	0.830041	1	0.999992	1.01261	1.01261	OLZ up vs VEH	0.24313	1	0.999678	1.07508	1.07508	PCP+OLZ up vs PCP	0.0254053	1	0.999419	0.869559	-1.15001	PCP down vs VEH
976_s_at	MAPK1	mitogen-activated protein kinase 1	NM_002745 /// NM_138957	0.0321836	1	0.741184	0.581825	1	0.999954	0.965743	-1.03547	AHA down vs VEH	0.273053	1	0.81859	0.93034	-1.07488	AOL down vs VEH	0.33709	1	0.549694	1.06291	1.06291	HAL up vs VEH	0.160323	1	0.999992	0.914058	-1.09402	OLZ down vs VEH	0.0695024	1	0.999678	1.13135	1.13135	PCP+OLZ up vs PCP	0.00963301	1	0.999419	0.837608	-1.19388	PCP down vs VEH
185_at	NOVA1	neuro-oncological ventral antigen 1	NM_002515 /// NM_006489 /// NM_006491	0.0322785	1	0.741184	0.700713	1	0.999954	1.02394	1.02394	AHA up vs VEH	0.0355584	1	0.81859	0.871314	-1.14769	AOL down vs VEH	0.121234	1	0.514474	1.10168	1.10168	HAL up vs VEH	0.452222	1	0.999992	1.04749	1.04749	OLZ up vs VEH	0.973925	1	0.999678	0.997886	-1.00212	PCP+OLZ down vs PCP	0.62622	1	0.999419	0.969407	-1.03156	PCP down vs VEH
36204_at	PTPRF	protein tyrosine phosphatase, receptor type, F	NM_002840 /// NM_130440	0.0324527	1	0.741184	0.0202851	1	0.999954	1.148	1.148	AHA up vs VEH	0.845506	1	0.940857	1.01163	1.01163	AOL up vs VEH	0.0171538	1	0.514474	1.15259	1.15259	HAL up vs VEH	0.0928433	1	0.999992	1.1032	1.1032	OLZ up vs VEH	0.309798	1	0.999678	1.06369	1.06369	PCP+OLZ up vs PCP	0.661681	1	0.999419	0.97431	-1.02637	PCP down vs VEH
620_at	RAB3A	RAB3A, member RAS oncogene family	NM_002866	0.0325037	1	0.741184	0.13658	1	0.999954	0.911086	-1.09759	AHA down vs VEH	0.214685	1	0.81859	0.923177	-1.08322	AOL down vs VEH	0.780626	1	0.830581	1.01732	1.01732	HAL up vs VEH	0.998558	1	0.999992	1.00011	1.00011	OLZ up vs VEH	0.00281476	1	0.999678	1.22867	1.22867	PCP+OLZ up vs PCP	0.0336883	1	0.999419	0.869581	-1.14998	PCP down vs VEH
36972_at	TMED2	transmembrane emp24 domain trafficking protein 2	NM_006815	0.0327274	1	0.741184	0.891954	1	0.999954	0.992609	-1.00745	AHA down vs VEH	0.179005	1	0.81859	0.926031	-1.07988	AOL down vs VEH	0.0927009	1	0.514474	1.09809	1.09809	HAL up vs VEH	0.623508	1	0.999992	1.02721	1.02721	OLZ up vs VEH	0.314528	1	0.999678	1.05995	1.05995	PCP+OLZ up vs PCP	0.087822	1	0.999419	0.906236	-1.10347	PCP down vs VEH
40099_at	ARHGEF2	Rho/Rac guanine nucleotide exchange factor (GEF) 2	NM_001162383 /// NM_001162384 /// NM_004723	0.0327427	1	0.741184	0.508567	1	0.999954	1.03748	1.03748	AHA up vs VEH	0.149623	1	0.81859	0.919542	-1.0875	AOL down vs VEH	0.0514172	1	0.514474	1.11727	1.11727	HAL up vs VEH	0.128212	1	0.999992	1.08951	1.08951	OLZ up vs VEH	0.60323	1	0.999678	1.03089	1.03089	PCP+OLZ up vs PCP	0.611348	1	0.999419	0.971167	-1.02969	PCP down vs VEH
895_at	MIF	macrophage migration inhibitory factor (glycosylation-inhibiting factor)	NM_002415	0.0327963	1	0.741184	0.317857	1	0.999954	1.05785	1.05785	AHA up vs VEH	0.98709	1	0.994929	0.999064	-1.00094	AOL down vs VEH	0.0113225	1	0.514474	1.15941	1.15941	HAL up vs VEH	0.0392548	1	0.999992	1.12596	1.12596	OLZ up vs VEH	0.362078	1	0.999678	1.05545	1.05545	PCP+OLZ up vs PCP	0.607504	1	0.999419	0.970632	-1.03026	PCP down vs VEH
2037_s_at	RPS6KB1	ribosomal protein S6 kinase, 70kDa, polypeptide 1	NM_003161	0.033071	1	0.741184	0.926064	1	0.999954	0.993042	-1.00701	AHA down vs VEH	0.453367	1	0.820158	0.943099	-1.06033	AOL down vs VEH	0.382631	1	0.565004	1.06825	1.06825	HAL up vs VEH	0.38208	1	0.999992	1.06833	1.06833	OLZ up vs VEH	0.0310994	1	0.999678	1.19266	1.19266	PCP+OLZ up vs PCP	0.0126199	1	0.999419	0.816523	-1.22471	PCP down vs VEH
35231_at	SRP19	signal recognition particle 19kDa	NM_003135	0.033073	1	0.741184	0.244166	1	0.999954	1.07733	1.07733	AHA up vs VEH	0.682605	1	0.881156	0.973513	-1.02721	AOL down vs VEH	0.0066107	1	0.514474	1.19834	1.19834	HAL up vs VEH	0.262657	1	0.999992	1.07422	1.07422	OLZ up vs VEH	0.181409	1	0.999678	1.09445	1.09445	PCP+OLZ up vs PCP	0.551142	1	0.999419	0.961537	-1.04	PCP down vs VEH
37738_g_at	PCMT1	protein-L-isoaspartate (D-aspartate) O-methyltransferase	NM_005389	0.0331936	1	0.741184	0.495869	1	0.999954	0.950165	-1.05245	AHA down vs VEH	0.704035	1	0.889682	1.02988	1.02988	AOL up vs VEH	0.17378	1	0.514474	1.10855	1.10855	HAL up vs VEH	0.936049	1	0.999992	1.00602	1.00602	OLZ up vs VEH	0.00736617	1	0.999678	1.24811	1.24811	PCP+OLZ up vs PCP	0.0241374	1	0.999419	0.834555	-1.19824	PCP down vs VEH
37719_at	MLF2	myeloid leukemia factor 2	NM_005439 /// NR_026581	0.0335074	1	0.741184	0.885033	1	0.999954	1.00826	1.00826	AHA up vs VEH	0.218358	1	0.81859	0.929433	-1.07592	AOL down vs VEH	0.168858	1	0.514474	1.08249	1.08249	HAL up vs VEH	0.860325	1	0.999992	1.01006	1.01006	OLZ up vs VEH	0.0302935	1	0.999678	1.14328	1.14328	PCP+OLZ up vs PCP	0.02448	1	0.999419	0.871856	-1.14698	PCP down vs VEH
36308_at	ZIC1	Zic family member 1 (odd-paired homolog, Drosophila)	NM_003412	0.0335089	1	0.741184	0.58342	1	0.999954	1.04164	1.04164	AHA up vs VEH	0.325787	1	0.81859	0.926843	-1.07893	AOL down vs VEH	0.106544	1	0.514474	1.12969	1.12969	HAL up vs VEH	0.709853	1	0.999992	0.972728	-1.02804	OLZ down vs VEH	0.403103	1	0.999678	0.936445	-1.06787	PCP+OLZ down vs PCP	0.384599	1	0.999419	0.935006	-1.06951	PCP down vs VEH
37027_at	AHNAK	AHNAK nucleoprotein	NM_001620 /// NM_024060	0.0339097	1	0.741184	0.338721	1	0.999954	1.05336	1.05336	AHA up vs VEH	0.473942	1	0.823393	0.960649	-1.04096	AOL down vs VEH	0.0418813	1	0.514474	1.11961	1.11961	HAL up vs VEH	0.715072	1	0.999992	0.980461	-1.01993	OLZ down vs VEH	0.783	1	0.999678	1.01579	1.01579	PCP+OLZ up vs PCP	0.282067	1	0.999419	0.941167	-1.06251	PCP down vs VEH
32923_r_at	SYN1	synapsin I	NM_006950 /// NM_133499	0.0340479	1	0.741184	0.300831	1	0.999954	0.948729	-1.05404	AHA down vs VEH	0.269118	1	0.81859	0.943443	-1.05995	AOL down vs VEH	0.501213	1	0.629273	1.03466	1.03466	HAL up vs VEH	0.316154	1	0.999992	0.950308	-1.05229	OLZ down vs VEH	0.00539691	1	0.999678	1.16872	1.16872	PCP+OLZ up vs PCP	0.0072175	1	0.999419	0.8628	-1.15902	PCP down vs VEH
35817_at	MBP	myelin basic protein	NM_001025081 /// NM_001025090 /// NM_001025092 /// NM_001025100 /// NM_001025101	0.0343957	1	0.741184	0.194555	1	0.999954	0.91248	-1.09591	AHA down vs VEH	0.0491334	1	0.81859	0.864292	-1.15702	AOL down vs VEH	0.128553	1	0.514474	0.897845	-1.11378	HAL down vs VEH	0.763856	1	0.999992	0.979232	-1.02121	OLZ down vs VEH	0.0429812	1	0.999678	1.16522	1.16522	PCP+OLZ up vs PCP	0.00130829	1	0.481517	0.779317	-1.28317	PCP down vs VEH
41785_at	EIF4G2	eukaryotic translation initiation factor 4 gamma, 2	NM_001042559 /// NM_001418	0.0345857	1	0.741184	0.377729	1	0.999954	1.04762	1.04762	AHA up vs VEH	0.200081	1	0.81859	0.932103	-1.07284	AOL down vs VEH	0.0497397	1	0.514474	1.11141	1.11141	HAL up vs VEH	0.6745	1	0.999992	1.0223	1.0223	OLZ up vs VEH	0.639158	1	0.999678	1.02628	1.02628	PCP+OLZ up vs PCP	0.298092	1	0.999419	0.944642	-1.0586	PCP down vs VEH
31888_s_at	PHLDA2	pleckstrin homology-like domain, family A, member 2	NM_003311	0.0346546	1	0.741184	0.317335	1	0.999954	1.06455	1.06455	AHA up vs VEH	0.0154107	1	0.81859	0.850421	-1.17589	AOL down vs VEH	0.479642	1	0.614988	1.04506	1.04506	HAL up vs VEH	0.975465	1	0.999992	1.00191	1.00191	OLZ up vs VEH	0.906682	1	0.999678	1.0077	1.0077	PCP+OLZ up vs PCP	0.431318	1	0.999419	0.950415	-1.05217	PCP down vs VEH
36930_at	GNL2	guanine nucleotide binding protein-like 2 (nucleolar)	NM_013285	0.0346892	1	0.741184	0.56521	1	0.999954	1.03713	1.03713	AHA up vs VEH	0.0668662	1	0.81859	0.884561	-1.1305	AOL down vs VEH	0.0788116	1	0.514474	1.1202	1.1202	HAL up vs VEH	0.651875	1	0.999992	0.971826	-1.02899	OLZ down vs VEH	0.988113	1	0.999678	0.999008	-1.00099	PCP+OLZ down vs PCP	0.509743	1	0.999419	0.957606	-1.04427	PCP down vs VEH
755_at	ITPR1	inositol 1,4,5-triphosphate receptor, type 1	NM_001099952 /// NM_002222	0.034811	1	0.741184	0.297158	1	0.999954	1.06955	1.06955	AHA up vs VEH	0.604829	1	0.856231	0.966246	-1.03493	AOL down vs VEH	0.0212801	1	0.514474	1.16509	1.16509	HAL up vs VEH	0.501023	1	0.999992	1.04416	1.04416	OLZ up vs VEH	0.12969	1	0.999678	1.10929	1.10929	PCP+OLZ up vs PCP	0.199827	1	0.999419	0.917637	-1.08976	PCP down vs VEH
941_at	PSMB6	proteasome (prosome, macropain) subunit, beta type, 6	NM_002798	0.0349247	1	0.741184	0.464827	1	0.999954	1.04338	1.04338	AHA up vs VEH	0.717458	1	0.895952	0.97854	-1.02193	AOL down vs VEH	0.00994072	1	0.514474	1.16894	1.16894	HAL up vs VEH	0.560519	1	0.999992	1.03435	1.03435	OLZ up vs VEH	0.326617	1	0.999678	1.06203	1.06203	PCP+OLZ up vs PCP	0.352249	1	0.999419	0.945439	-1.05771	PCP down vs VEH
39928_at	GRM3	glutamate receptor, metabotropic 3	NM_000840	0.0349931	1	0.741184	0.453268	1	0.999954	1.04506	1.04506	AHA up vs VEH	0.371735	1	0.81859	0.94706	-1.0559	AOL down vs VEH	0.0593577	1	0.514474	1.11969	1.11969	HAL up vs VEH	0.234508	1	0.999992	1.07279	1.07279	OLZ up vs VEH	0.96061	1	0.999678	0.99696	-1.00305	PCP+OLZ down vs PCP	0.395213	1	0.999419	0.949514	-1.05317	PCP down vs VEH
41537_r_at	NFIX	nuclear factor I/X (CCAAT-binding transcription factor)	NM_002501	0.035062	1	0.741184	0.585566	1	0.999954	1.03311	1.03311	AHA up vs VEH	0.144806	1	0.81859	0.912812	-1.09552	AOL down vs VEH	0.179391	1	0.514474	1.08439	1.08439	HAL up vs VEH	0.584375	1	0.999992	1.03322	1.03322	OLZ up vs VEH	0.01489	1	0.999678	0.852932	-1.17243	PCP+OLZ down vs PCP	0.0722879	1	0.999419	1.12009	1.12009	PCP up vs VEH
40405_at	NAB2	NGFI-A binding protein 2 (EGR1 binding protein 2)	NM_005967	0.0351509	1	0.741184	0.891468	1	0.999954	1.00671	1.00671	AHA up vs VEH	0.00662701	1	0.81859	0.865288	-1.15568	AOL down vs VEH	0.886967	1	0.912622	1.00699	1.00699	HAL up vs VEH	0.864903	1	0.999992	0.991695	-1.00837	OLZ down vs VEH	0.136149	1	0.999678	1.08117	1.08117	PCP+OLZ up vs PCP	0.0664565	1	0.999419	0.909111	-1.09998	PCP down vs VEH
36675_r_at	PFN1	profilin 1	NM_005022	0.0353829	1	0.741184	0.831681	1	0.999954	0.985884	-1.01432	AHA down vs VEH	0.142079	1	0.81859	0.902095	-1.10853	AOL down vs VEH	0.136648	1	0.514474	1.10629	1.10629	HAL up vs VEH	0.449721	1	0.999992	0.950529	-1.05205	OLZ down vs VEH	0.285532	1	0.999678	1.0787	1.0787	PCP+OLZ up vs PCP	0.0519887	1	0.999419	0.871068	-1.14802	PCP down vs VEH
32398_s_at	LRP8	low density lipoprotein receptor-related protein 8, apolipoprotein e receptor	NM_001018054 /// NM_004631 /// NM_017522 /// NM_033300	0.0357919	1	0.741184	0.0271692	1	0.999954	1.12423	1.12423	AHA up vs VEH	0.332234	1	0.81859	0.949536	-1.05315	AOL down vs VEH	0.0880363	1	0.514474	1.09333	1.09333	HAL up vs VEH	0.198395	1	0.999992	1.06898	1.06898	OLZ up vs VEH	0.629596	1	0.999678	0.97425	-1.02643	PCP+OLZ down vs PCP	0.0551507	1	0.999419	1.11008	1.11008	PCP up vs VEH
777_at	GDI2	GDP dissociation inhibitor 2	NM_001115156 /// NM_001494	0.0361484	1	0.741184	0.271398	1	0.999954	0.938473	-1.06556	AHA down vs VEH	0.0423734	1	0.81859	0.883692	-1.13162	AOL down vs VEH	0.813265	1	0.854108	0.986557	-1.01363	HAL down vs VEH	0.167763	1	0.999992	0.923104	-1.0833	OLZ down vs VEH	0.0096825	1	0.999678	1.17727	1.17727	PCP+OLZ up vs PCP	0.00238693	1	0.675776	0.825461	-1.21144	PCP down vs VEH
1557_at	PAK1	p21 protein (Cdc42/Rac)-activated kinase 1	NM_001128620 /// NM_002576	0.0363596	1	0.741184	0.0728907	1	0.999954	0.863503	-1.15807	AHA down vs VEH	0.209238	1	0.81859	0.900203	-1.11086	AOL down vs VEH	0.572112	1	0.676082	0.955674	-1.04638	HAL down vs VEH	0.229518	1	0.999992	0.907412	-1.10204	OLZ down vs VEH	0.00668373	1	0.999678	1.27167	1.27167	PCP+OLZ up vs PCP	0.00122541	1	0.481517	0.749823	-1.33365	PCP down vs VEH
39358_at	NCOR2	nuclear receptor co-repressor 2	NM_001077261 /// NM_006312	0.0365747	1	0.741184	0.959899	1	0.999954	1.00336	1.00336	AHA up vs VEH	0.0452175	1	0.81859	0.867778	-1.15237	AOL down vs VEH	0.446056	1	0.595901	1.05229	1.05229	HAL up vs VEH	0.824234	1	0.999992	1.01491	1.01491	OLZ up vs VEH	0.122949	1	0.999678	1.11622	1.11622	PCP+OLZ up vs PCP	0.0288855	1	0.999419	0.855802	-1.16849	PCP down vs VEH
1357_at	USP4	ubiquitin specific peptidase 4 (proto-oncogene)	NM_003363 /// NM_199443	0.0366361	1	0.741184	0.823186	1	0.999954	1.0156	1.0156	AHA up vs VEH	0.230985	1	0.81859	0.917	-1.09051	AOL down vs VEH	0.0429914	1	0.514474	1.15495	1.15495	HAL up vs VEH	0.487658	1	0.999992	1.0494	1.0494	OLZ up vs VEH	0.727028	1	0.999678	1.0258	1.0258	PCP+OLZ up vs PCP	0.303707	1	0.999419	0.928396	-1.07713	PCP down vs VEH
38839_at	PFN2	profilin 2	NM_002628 /// NM_053024	0.0366797	1	0.741184	0.864564	1	0.999954	0.989403	-1.01071	AHA down vs VEH	0.264356	1	0.81859	0.929865	-1.07542	AOL down vs VEH	0.0968295	1	0.514474	1.1114	1.1114	HAL up vs VEH	0.607652	1	0.999992	1.03264	1.03264	OLZ up vs VEH	0.0355734	1	0.999678	1.15298	1.15298	PCP+OLZ up vs PCP	0.0562768	1	0.999419	0.881153	-1.13488	PCP down vs VEH
41724_at	BCAP31	B-cell receptor-associated protein 31	NM_001139441 /// NM_001139457 /// NM_005745 /// NR_024450	0.0366802	1	0.741184	0.38139	1	0.999954	1.04844	1.04844	AHA up vs VEH	0.0594258	1	0.81859	0.898183	-1.11336	AOL down vs VEH	0.310756	1	0.536392	1.05641	1.05641	HAL up vs VEH	0.335295	1	0.999992	1.05351	1.05351	OLZ up vs VEH	0.342201	1	0.999678	1.05558	1.05558	PCP+OLZ up vs PCP	0.185094	1	0.999419	0.928051	-1.07753	PCP down vs VEH
32274_r_at	XRCC6	X-ray repair complementing defective repair in Chinese hamster cells 6	NM_001469	0.0367164	1	0.741184	0.794884	1	0.999954	1.01198	1.01198	AHA up vs VEH	0.0703812	1	0.81859	0.916109	-1.09157	AOL down vs VEH	0.0940209	1	0.514474	1.08126	1.08126	HAL up vs VEH	0.224926	1	0.999992	0.94543	-1.05772	OLZ down vs VEH	0.710137	1	0.999678	1.0181	1.0181	PCP+OLZ up vs PCP	0.708037	1	0.999419	0.98238	-1.01794	PCP down vs VEH
514_at	CBLB	Cas-Br-M (murine) ecotropic retroviral transforming sequence b	NM_170662	0.0367589	1	0.741184	0.344919	1	0.999954	1.06278	1.06278	AHA up vs VEH	0.992346	1	0.995814	1.00064	1.00064	AOL up vs VEH	0.00646181	1	0.514474	1.20141	1.20141	HAL up vs VEH	0.466877	1	0.999992	1.0479	1.0479	OLZ up vs VEH	0.87653	1	0.999678	0.989571	-1.01054	PCP+OLZ down vs PCP	0.820651	1	0.999419	0.98506	-1.01517	PCP down vs VEH
40797_at	ADAM10	ADAM metallopeptidase domain 10	NM_001110	0.0368935	1	0.741184	0.674145	1	0.999954	1.02521	1.02521	AHA up vs VEH	0.327847	1	0.81859	0.941535	-1.06209	AOL down vs VEH	0.0360888	1	0.514474	1.13615	1.13615	HAL up vs VEH	0.554308	1	0.999992	1.03567	1.03567	OLZ up vs VEH	0.464544	1	0.999678	0.955332	-1.04676	PCP+OLZ down vs PCP	0.70352	1	0.999419	0.976939	-1.02361	PCP down vs VEH
39758_f_at	LAMP1	lysosomal-associated membrane protein 1	NM_005561	0.0369009	1	0.741184	0.991527	1	0.999954	1.00064	1.00064	AHA up vs VEH	0.508442	1	0.827359	0.959251	-1.04248	AOL down vs VEH	0.0489684	1	0.514474	1.13035	1.13035	HAL up vs VEH	0.280669	1	0.999992	1.06814	1.06814	OLZ up vs VEH	0.281512	1	0.999678	1.07174	1.07174	PCP+OLZ up vs PCP	0.14654	1	0.999419	0.911676	-1.09688	PCP down vs VEH
38590_r_at	PTMA	prothymosin, alpha	NM_001099285 /// NM_002823	0.0370638	1	0.741184	0.75921	1	0.999954	1.02171	1.02171	AHA up vs VEH	0.0893462	1	0.81859	0.882075	-1.13369	AOL down vs VEH	0.0791526	1	0.514474	1.13372	1.13372	HAL up vs VEH	0.786404	1	0.999992	1.01917	1.01917	OLZ up vs VEH	0.165791	1	0.999678	1.10904	1.10904	PCP+OLZ up vs PCP	0.172035	1	0.999419	0.904572	-1.1055	PCP down vs VEH
39770_at	SMG7	Smg-7 homolog, nonsense mediated mRNA decay factor (C. elegans)	NM_173156 /// NM_201568 /// NM_201569	0.0372346	1	0.741184	0.143284	1	0.999954	1.08517	1.08517	AHA up vs VEH	0.129611	1	0.81859	0.916077	-1.09161	AOL down vs VEH	0.0863959	1	0.514474	1.10106	1.10106	HAL up vs VEH	0.355092	1	0.999992	1.05253	1.05253	OLZ up vs VEH	0.102809	1	0.999678	1.10103	1.10103	PCP+OLZ up vs PCP	0.7234	1	0.999419	0.980007	-1.0204	PCP down vs VEH
39147_g_at	ATRX	alpha thalassemia/mental retardation syndrome X-linked (RAD54 homolog, S. cerevi	NM_000489 /// NM_138270	0.0376783	1	0.741184	0.861299	1	0.999954	1.01135	1.01135	AHA up vs VEH	0.444387	1	0.819966	0.949995	-1.05264	AOL down vs VEH	0.0236351	1	0.514474	1.1633	1.1633	HAL up vs VEH	0.395672	1	0.999992	1.05666	1.05666	OLZ up vs VEH	0.298322	1	0.999678	1.07382	1.07382	PCP+OLZ up vs PCP	0.247702	1	0.999419	0.924954	-1.08113	PCP down vs VEH
40646_at	CX3CR1	chemokine (C-X3-C motif) receptor 1	NM_001337	0.0377229	1	0.741184	0.142338	1	0.999954	1.08133	1.08133	AHA up vs VEH	0.233504	1	0.81859	1.06755	1.06755	AOL up vs VEH	0.0333076	1	0.514474	1.12217	1.12217	HAL up vs VEH	0.555891	1	0.999992	1.0315	1.0315	OLZ up vs VEH	0.237388	1	0.999678	0.936164	-1.06819	PCP+OLZ down vs PCP	0.913019	1	0.999419	1.00596	1.00596	PCP up vs VEH
41344_s_at	PURA	purine-rich element binding protein A	NM_005859	0.0377609	1	0.741184	0.951286	1	0.999954	1.00355	1.00355	AHA up vs VEH	0.0153353	1	0.81859	0.859643	-1.16327	AOL down vs VEH	0.331836	1	0.547127	1.05823	1.05823	HAL up vs VEH	0.501557	1	0.999992	1.03984	1.03984	OLZ up vs VEH	0.788965	1	0.999678	1.01647	1.01647	PCP+OLZ up vs PCP	0.397765	1	0.999419	0.950276	-1.05233	PCP down vs VEH
34335_at	EFNB2	ephrin-B2	NM_004093	0.0377614	1	0.741184	0.570687	1	0.999954	0.960333	-1.0413	AHA down vs VEH	0.200509	1	0.81859	0.909039	-1.10006	AOL down vs VEH	0.0382136	1	0.514474	1.16409	1.16409	HAL up vs VEH	0.865134	1	0.999992	0.987973	-1.01217	OLZ down vs VEH	0.853779	1	0.999678	0.986271	-1.01392	PCP+OLZ down vs PCP	0.509457	1	0.999419	0.952364	-1.05002	PCP down vs VEH
1846_at	LGALS8	lectin, galactoside-binding, soluble, 8	NM_006499 /// NM_201543 /// NM_201544 /// NM_201545	0.0377653	1	0.741184	0.541327	1	0.999954	1.03837	1.03837	AHA up vs VEH	0.0173482	1	0.81859	0.85451	-1.17026	AOL down vs VEH	0.292493	1	0.531953	1.06738	1.06738	HAL up vs VEH	0.744919	1	0.999992	1.02022	1.02022	OLZ up vs VEH	0.717697	1	0.999678	1.0237	1.0237	PCP+OLZ up vs PCP	0.405712	1	0.999419	0.948196	-1.05463	PCP down vs VEH
31538_at	RPLP0	ribosomal protein, large, P0	NM_001002 /// NM_053275	0.0379983	1	0.741184	0.384274	1	0.999954	1.04905	1.04905	AHA up vs VEH	0.4765	1	0.82393	1.0413	1.0413	AOL up vs VEH	0.00354501	1	0.514474	1.18429	1.18429	HAL up vs VEH	0.60305	1	0.999992	1.02894	1.02894	OLZ up vs VEH	0.0610177	1	0.999678	1.11692	1.11692	PCP+OLZ up vs PCP	0.831643	1	0.999419	0.988011	-1.01213	PCP down vs VEH
32470_at	GIF	gastric intrinsic factor (vitamin B synthesis)	NM_005142	0.0384251	1	0.741184	0.437044	1	0.999954	1.04087	1.04087	AHA up vs VEH	0.708387	1	0.890482	0.980313	-1.02008	AOL down vs VEH	0.0854217	1	0.514474	1.09425	1.09425	HAL up vs VEH	0.240711	1	0.999992	0.941027	-1.06267	OLZ down vs VEH	0.0408543	1	0.999678	0.892548	-1.12039	PCP+OLZ down vs PCP	0.177263	1	0.999419	1.07532	1.07532	PCP up vs VEH
31692_at	HSPA1A	heat shock 70kDa protein 1A	NM_005345	0.0384349	1	0.741184	0.701984	1	0.999954	1.02284	1.02284	AHA up vs VEH	0.00296227	1	0.81859	0.82492	-1.21224	AOL down vs VEH	0.367442	1	0.557198	0.94797	-1.05489	HAL down vs VEH	0.339639	1	0.999992	0.944926	-1.05828	OLZ down vs VEH	0.560396	1	0.999678	1.03689	1.03689	PCP+OLZ up vs PCP	0.368624	1	0.999419	0.946291	-1.05676	PCP down vs VEH
31719_at	FN1	fibronectin 1	NM_002026 /// NM_054034 /// NM_212474 /// NM_212475 /// NM_212476 /// NM_212478	0.0386371	1	0.741184	0.334922	1	0.999954	1.0605	1.0605	AHA up vs VEH	0.110675	1	0.81859	0.90336	-1.10698	AOL down vs VEH	0.772746	1	0.823539	1.01765	1.01765	HAL up vs VEH	0.347	1	0.999992	0.944335	-1.05895	OLZ down vs VEH	0.781204	1	0.999678	0.982442	-1.01787	PCP+OLZ down vs PCP	0.122808	1	0.999419	0.90636	-1.10331	PCP down vs VEH
40071_at	CYP1B1	cytochrome P450, family 1, subfamily B, polypeptide 1	NM_000104	0.0389308	1	0.741184	0.880618	1	0.999954	1.00843	1.00843	AHA up vs VEH	0.377818	1	0.81859	0.950061	-1.05256	AOL down vs VEH	0.215963	1	0.514474	1.07232	1.07232	HAL up vs VEH	0.306904	1	0.999992	0.944151	-1.05915	OLZ down vs VEH	0.124428	1	0.999678	0.912294	-1.09614	PCP+OLZ down vs PCP	0.565227	1	0.999419	0.967205	-1.03391	PCP down vs VEH
227_g_at	PRKAR1A	protein kinase, cAMP-dependent, regulatory, type I, alpha (tissue specific extin	NM_002734 /// NM_212471 /// NM_212472	0.0389704	1	0.741184	0.485141	1	0.999954	0.948479	-1.05432	AHA down vs VEH	0.160136	1	0.81859	0.894746	-1.11764	AOL down vs VEH	0.299906	1	0.532853	1.08205	1.08205	HAL up vs VEH	0.760674	1	0.999992	0.977243	-1.02329	OLZ down vs VEH	0.0724848	1	0.999678	1.15713	1.15713	PCP+OLZ up vs PCP	0.0127929	1	0.999419	0.816228	-1.22515	PCP down vs VEH
2039_s_at	FYN	FYN oncogene related to SRC, FGR, YES	NM_002037 /// NM_153047 /// NM_153048	0.0390533	1	0.741184	0.297454	1	0.999954	1.06199	1.06199	AHA up vs VEH	0.189912	1	0.81859	0.924393	-1.08179	AOL down vs VEH	0.200896	1	0.514474	1.07692	1.07692	HAL up vs VEH	0.383083	1	0.999992	1.05152	1.05152	OLZ up vs VEH	0.750685	1	0.999678	1.01937	1.01937	PCP+OLZ up vs PCP	0.206277	1	0.999419	0.926978	-1.07877	PCP down vs VEH
32320_at	ANXA13	annexin A13	NM_001003954 /// NM_004306	0.0391518	1	0.741184	0.442548	1	0.999954	1.04265	1.04265	AHA up vs VEH	0.983802	1	0.993682	1.00114	1.00114	AOL up vs VEH	0.102891	1	0.514474	1.09412	1.09412	HAL up vs VEH	0.378234	1	0.999992	0.953147	-1.04916	OLZ down vs VEH	0.0112678	1	0.999678	0.859886	-1.16294	PCP+OLZ down vs PCP	0.12155	1	0.999419	1.0923	1.0923	PCP up vs VEH
31481_s_at	TMSB10	thymosin beta 10	NM_021103	0.039204	1	0.741184	0.348956	1	0.999954	1.05887	1.05887	AHA up vs VEH	0.21293	1	0.81859	0.923987	-1.08227	AOL down vs VEH	0.0279423	1	0.514474	1.14783	1.14783	HAL up vs VEH	0.11139	1	0.999992	1.10331	1.10331	OLZ up vs VEH	0.5722	1	0.999678	1.03685	1.03685	PCP+OLZ up vs PCP	0.932051	1	0.999419	0.994652	-1.00538	PCP down vs VEH
34085_at	RPL38	ribosomal protein L38	NM_000999 /// NM_001035258	0.0393218	1	0.741184	0.0869998	1	0.999954	1.10601	1.10601	AHA up vs VEH	0.296018	1	0.81859	0.939063	-1.06489	AOL down vs VEH	0.0768371	1	0.514474	1.10994	1.10994	HAL up vs VEH	0.300032	1	0.999992	1.06211	1.06211	OLZ up vs VEH	0.671764	1	0.999678	1.02612	1.02612	PCP+OLZ up vs PCP	0.499431	1	0.999419	0.960302	-1.04134	PCP down vs VEH
40444_s_at	CTNND1	catenin (cadherin-associated protein), delta 1	NM_001085458 /// NM_001085459 /// NM_001085460 /// NM_001085461 /// NM_001085462	0.0393362	1	0.741184	0.367536	1	0.999954	1.04799	1.04799	AHA up vs VEH	0.138079	1	0.81859	0.922597	-1.0839	AOL down vs VEH	0.0510833	1	0.514474	1.1091	1.1091	HAL up vs VEH	0.887539	1	0.999992	0.992708	-1.00735	OLZ down vs VEH	0.539416	1	0.999678	1.03408	1.03408	PCP+OLZ up vs PCP	0.397497	1	0.999419	0.955461	-1.04662	PCP down vs VEH
824_at	GSTO1	glutathione S-transferase omega 1	NM_004832	0.0393926	1	0.741184	0.473761	1	0.999954	0.962767	-1.03867	AHA down vs VEH	0.275159	1	0.81859	0.941698	-1.06191	AOL down vs VEH	0.206254	1	0.514474	1.06976	1.06976	HAL up vs VEH	0.541156	1	0.999992	1.03286	1.03286	OLZ up vs VEH	0.00740757	1	0.999678	1.16908	1.16908	PCP+OLZ up vs PCP	0.133472	1	0.999419	0.92009	-1.08685	PCP down vs VEH
930_at	PPP2R3A	protein phosphatase 2 (formerly 2A), regulatory subunit B'', alpha	NM_002718 /// NM_181897	0.0395892	1	0.741184	0.500945	1	0.999954	1.04202	1.04202	AHA up vs VEH	0.371898	1	0.81859	0.944941	-1.05827	AOL down vs VEH	0.0727986	1	0.514474	1.11827	1.11827	HAL up vs VEH	0.275735	1	0.999992	0.935202	-1.06929	OLZ down vs VEH	0.15403	1	0.999678	0.911406	-1.09721	PCP+OLZ down vs PCP	0.720725	1	0.999419	1.02286	1.02286	PCP up vs VEH
41205_at	UBE3A	ubiquitin protein ligase E3A	NM_000462 /// NM_130838 /// NM_130839	0.0396584	1	0.741184	0.374347	1	0.999954	1.04754	1.04754	AHA up vs VEH	0.170072	1	0.81859	0.927975	-1.07761	AOL down vs VEH	0.0276357	1	0.514474	1.12562	1.12562	HAL up vs VEH	0.293396	1	0.999992	1.05659	1.05659	OLZ up vs VEH	0.66588	1	0.999678	0.976606	-1.02395	PCP+OLZ down vs PCP	0.790497	1	0.999419	1.01442	1.01442	PCP up vs VEH
37953_s_at	ACCN2	amiloride-sensitive cation channel 2, neuronal	NM_001095 /// NM_020039	0.0398355	1	0.741184	0.0753674	1	0.999954	1.10694	1.10694	AHA up vs VEH	0.408623	1	0.819966	0.953098	-1.04921	AOL down vs VEH	0.0402129	1	0.514474	1.12529	1.12529	HAL up vs VEH	0.364641	1	0.999992	1.05231	1.05231	OLZ up vs VEH	0.72986	1	0.999678	1.02056	1.02056	PCP+OLZ up vs PCP	0.612307	1	0.999419	0.971017	-1.02985	PCP down vs VEH
40471_at	PEX19	peroxisomal biogenesis factor 19	NM_001131039 /// NM_002857	0.0398477	1	0.741184	0.764599	1	0.999954	0.984282	-1.01597	AHA down vs VEH	0.276931	1	0.81859	0.941816	-1.06178	AOL down vs VEH	0.0267488	1	0.514474	1.12868	1.12868	HAL up vs VEH	0.943897	1	0.999992	0.996286	-1.00373	OLZ down vs VEH	0.741046	1	0.999678	0.981759	-1.01858	PCP+OLZ down vs PCP	0.647264	1	0.999419	0.975219	-1.02541	PCP down vs VEH
37270_at	ATP1B2	ATPase, Na+/K+ transporting, beta 2 polypeptide	NM_001678	0.0400792	1	0.741184	0.0220027	1	0.999954	1.13996	1.13996	AHA up vs VEH	0.533121	1	0.831673	1.03634	1.03634	AOL up vs VEH	0.00246185	1	0.514474	1.19471	1.19471	HAL up vs VEH	0.0411005	1	0.999992	1.12296	1.12296	OLZ up vs VEH	0.193131	1	0.999678	1.07951	1.07951	PCP+OLZ up vs PCP	0.568197	1	0.999419	1.03325	1.03325	PCP up vs VEH
1158_s_at	CALM3	calmodulin 3 (phosphorylase kinase, delta)	NM_005184	0.0402198	1	0.741184	0.930851	1	0.999954	1.00542	1.00542	AHA up vs VEH	0.0342485	1	0.81859	0.868848	-1.15095	AOL down vs VEH	0.346024	1	0.552409	1.06082	1.06082	HAL up vs VEH	0.664141	1	0.999992	1.02745	1.02745	OLZ up vs VEH	0.0501948	1	0.999678	1.14083	1.14083	PCP+OLZ up vs PCP	0.0969687	1	0.999419	0.89668	-1.11523	PCP down vs VEH
40052_at	ACTR1A	ARP1 actin-related protein 1 homolog A, centractin alpha (yeast)	NM_005736	0.0404155	1	0.741184	0.338639	1	0.999954	1.05843	1.05843	AHA up vs VEH	0.0564099	1	0.81859	0.887535	-1.12672	AOL down vs VEH	0.320897	1	0.541961	1.06071	1.06071	HAL up vs VEH	0.810953	1	0.999992	0.985984	-1.01421	OLZ down vs VEH	0.303099	1	0.999678	1.06653	1.06653	PCP+OLZ up vs PCP	0.110354	1	0.999419	0.90554	-1.10431	PCP down vs VEH
234_s_at	PTN	pleiotrophin	NM_002825	0.0404242	1	0.741184	0.925072	1	0.999954	1.00663	1.00663	AHA up vs VEH	0.181754	1	0.81859	0.906451	-1.1032	AOL down vs VEH	0.576158	1	0.678179	1.04014	1.04014	HAL up vs VEH	0.440776	1	0.999992	0.947082	-1.05588	OLZ down vs VEH	0.59864	1	0.999678	1.03977	1.03977	PCP+OLZ up vs PCP	0.0205545	1	0.999419	0.839694	-1.19091	PCP down vs VEH
32436_at	RPL27A	ribosomal protein L27a	NM_000990	0.0405034	1	0.741184	0.199778	1	0.999954	1.07287	1.07287	AHA up vs VEH	0.784253	1	0.916476	1.01549	1.01549	AOL up vs VEH	0.00531392	1	0.514474	1.1728	1.1728	HAL up vs VEH	0.0729737	1	0.999992	1.10451	1.10451	OLZ up vs VEH	0.499377	1	0.999678	1.03946	1.03946	PCP+OLZ up vs PCP	0.810099	1	0.999419	0.986582	-1.0136	PCP down vs VEH
40113_at	TRIB2	tribbles homolog 2 (Drosophila)	NM_021643 /// NR_027303	0.0405303	1	0.741184	0.801793	1	0.999954	0.985443	-1.01477	AHA down vs VEH	0.0247093	1	0.81859	0.869048	-1.15068	AOL down vs VEH	0.904805	1	0.925423	1.00701	1.00701	HAL up vs VEH	0.452917	1	0.999992	1.04497	1.04497	OLZ up vs VEH	0.372632	1	0.999678	1.05665	1.05665	PCP+OLZ up vs PCP	0.0569307	1	0.999419	0.88872	-1.12521	PCP down vs VEH
32489_at	GRIN2B	glutamate receptor, ionotropic, N-methyl D-aspartate 2B	NM_000834	0.0409818	1	0.741184	0.562108	1	0.999954	1.02995	1.02995	AHA up vs VEH	0.0906333	1	0.81859	0.913363	-1.09485	AOL down vs VEH	0.697142	1	0.765899	1.01998	1.01998	HAL up vs VEH	0.553387	1	0.999992	1.03063	1.03063	OLZ up vs VEH	0.0122208	1	0.999678	0.86956	-1.15001	PCP+OLZ down vs PCP	0.0741978	1	0.999419	1.10069	1.10069	PCP up vs VEH
1765_at	CASP10	caspase 10, apoptosis-related cysteine peptidase	NM_001230 /// NM_032974 /// NM_032977	0.0412999	1	0.741184	0.241158	1	0.999954	1.06982	1.06982	AHA up vs VEH	0.29915	1	0.81859	0.94014	-1.06367	AOL down vs VEH	0.0177057	1	0.514474	1.15089	1.15089	HAL up vs VEH	0.769913	1	0.999992	1.01684	1.01684	OLZ up vs VEH	0.620128	1	0.999678	0.970618	-1.03027	PCP+OLZ down vs PCP	0.809654	1	0.999419	1.01434	1.01434	PCP up vs VEH
1217_g_at	PRKCB	protein kinase C, beta	NM_002738 /// NM_212535	0.0414136	1	0.741184	0.467128	1	0.999954	0.959087	-1.04266	AHA down vs VEH	0.777214	1	0.913626	0.983373	-1.01691	AOL down vs VEH	0.280503	1	0.527344	1.06424	1.06424	HAL up vs VEH	0.796986	1	0.999992	1.01484	1.01484	OLZ up vs VEH	0.00349148	1	0.999678	1.20504	1.20504	PCP+OLZ up vs PCP	0.02328	1	0.999419	0.87	-1.14942	PCP down vs VEH
32678_at	MYO5A	myosin VA (heavy chain 12, myoxin)	NM_000259 /// NM_001142495	0.0414198	1	0.741184	0.958987	1	0.999954	0.997268	-1.00274	AHA down vs VEH	0.128721	1	0.81859	0.918581	-1.08864	AOL down vs VEH	0.218013	1	0.514474	1.06845	1.06845	HAL up vs VEH	0.114195	1	0.999992	0.91809	-1.08922	OLZ down vs VEH	0.101557	1	0.999678	0.910847	-1.09788	PCP+OLZ down vs PCP	0.712267	1	0.999419	1.02055	1.02055	PCP up vs VEH
2054_g_at	CDH2	cadherin 2, type 1, N-cadherin (neuronal)	NM_001792	0.0418094	1	0.741184	0.211158	1	0.999954	1.08333	1.08333	AHA up vs VEH	0.510314	1	0.827594	0.95765	-1.04422	AOL down vs VEH	0.0088661	1	0.514474	1.18963	1.18963	HAL up vs VEH	0.439496	1	0.999992	1.0504	1.0504	OLZ up vs VEH	0.955013	1	0.999678	1.00377	1.00377	PCP+OLZ up vs PCP	0.985393	1	0.999419	0.998799	-1.0012	PCP down vs VEH
1318_at	RBBP4	retinoblastoma binding protein 4	NM_001135255 /// NM_001135256 /// NM_005610	0.0419784	1	0.741184	0.791096	1	0.999954	0.982049	-1.01828	AHA down vs VEH	0.895009	1	0.962107	1.00938	1.00938	AOL up vs VEH	0.165116	1	0.514474	1.10088	1.10088	HAL up vs VEH	0.938308	1	0.999992	0.994723	-1.0053	OLZ down vs VEH	0.0577293	1	0.999678	1.15017	1.15017	PCP+OLZ up vs PCP	0.0197939	1	0.999419	0.842726	-1.18662	PCP down vs VEH
37640_at	HPRT1	hypoxanthine phosphoribosyltransferase 1	NM_000194	0.0422596	1	0.741184	0.95929	1	0.999954	1.00309	1.00309	AHA up vs VEH	0.152701	1	0.81859	0.913416	-1.09479	AOL down vs VEH	0.04746	1	0.514474	1.13075	1.13075	HAL up vs VEH	0.857536	1	0.999992	1.0109	1.0109	OLZ up vs VEH	0.220101	1	0.999678	1.08192	1.08192	PCP+OLZ up vs PCP	0.218489	1	0.999419	0.925205	-1.08084	PCP down vs VEH
32412_at	RPS14	ribosomal protein S14	NM_001025070 /// NM_001025071 /// NM_005617	0.0425555	1	0.741184	0.205311	1	0.999954	1.07194	1.07194	AHA up vs VEH	0.608844	1	0.856231	1.0292	1.0292	AOL up vs VEH	0.00353211	1	0.514474	1.18258	1.18258	HAL up vs VEH	0.329167	1	0.999992	1.05474	1.05474	OLZ up vs VEH	0.429621	1	0.999678	1.04636	1.04636	PCP+OLZ up vs PCP	0.734091	1	0.999419	0.981074	-1.01929	PCP down vs VEH
36138_at	CAPNS1	calpain, small subunit 1	NM_001003962 /// NM_001749	0.0425584	1	0.741184	0.536181	1	0.999954	0.96623	-1.03495	AHA down vs VEH	0.569529	1	0.84356	0.967864	-1.0332	AOL down vs VEH	0.0997031	1	0.514474	1.09731	1.09731	HAL up vs VEH	0.425471	1	0.999992	1.04533	1.04533	OLZ up vs VEH	0.0357827	1	0.999678	1.13441	1.13441	PCP+OLZ up vs PCP	0.0674368	1	0.999419	0.898258	-1.11327	PCP down vs VEH
32598_at	NELL2	NEL-like 2 (chicken)	NM_001145107 /// NM_001145108 /// NM_001145109 /// NM_001145110 /// NM_006159	0.0427058	1	0.741184	0.908262	1	0.999954	1.00764	1.00764	AHA up vs VEH	0.151725	1	0.81859	0.905431	-1.10445	AOL down vs VEH	0.0795973	1	0.514474	1.12551	1.12551	HAL up vs VEH	0.53368	1	0.999992	1.04209	1.04209	OLZ up vs VEH	0.200117	1	0.999678	1.09429	1.09429	PCP+OLZ up vs PCP	0.144777	1	0.999419	0.903731	-1.10652	PCP down vs VEH
41747_s_at	MEF2A	myocyte enhancer factor 2A	NM_001130926 /// NM_001130927 /// NM_001130928 /// NM_005587	0.0428168	1	0.741184	0.839837	1	0.999954	0.987206	-1.01296	AHA down vs VEH	0.0880616	1	0.81859	0.891707	-1.12145	AOL down vs VEH	0.0668074	1	0.514474	1.12684	1.12684	HAL up vs VEH	0.884719	1	0.999992	1.00928	1.00928	OLZ up vs VEH	0.885298	1	0.999678	1.00972	1.00972	PCP+OLZ up vs PCP	0.395818	1	0.999419	0.945265	-1.0579	PCP down vs VEH
40568_at	ATP6V1B2	ATPase, H+ transporting, lysosomal 56/58kDa, V1 subunit B2	NM_001693	0.042863	1	0.741184	0.0663055	1	0.999954	0.866278	-1.15436	AHA down vs VEH	0.0351335	1	0.81859	0.842297	-1.18723	AOL down vs VEH	0.451909	1	0.599046	0.943927	-1.0594	HAL down vs VEH	0.967478	1	0.999992	1.00312	1.00312	OLZ up vs VEH	0.0507312	1	0.999678	1.17502	1.17502	PCP+OLZ up vs PCP	0.00711144	1	0.999419	0.799518	-1.25075	PCP down vs VEH
39739_at	NACA	nascent polypeptide-associated complex alpha subunit	NM_001113201 /// NM_001113202 /// NM_001113203 /// NM_005594	0.0428794	1	0.741184	0.406766	1	0.999954	1.04978	1.04978	AHA up vs VEH	0.964588	1	0.986843	0.997326	-1.00268	AOL down vs VEH	0.0192434	1	0.514474	1.15208	1.15208	HAL up vs VEH	0.124854	1	0.999992	1.09514	1.09514	OLZ up vs VEH	0.130371	1	0.999678	1.09885	1.09885	PCP+OLZ up vs PCP	0.279793	1	0.999419	0.936354	-1.06797	PCP down vs VEH
35174_i_at	EEF1A2	eukaryotic translation elongation factor 1 alpha 2	NM_001958	0.043058	1	0.741184	0.278171	1	0.999954	0.928815	-1.07664	AHA down vs VEH	0.0209747	1	0.81859	0.845986	-1.18205	AOL down vs VEH	0.965021	1	0.974687	0.997041	-1.00297	HAL down vs VEH	0.725738	1	0.999992	1.024	1.024	OLZ up vs VEH	0.254302	1	0.999678	1.08523	1.08523	PCP+OLZ up vs PCP	0.0236791	1	0.999419	0.848863	-1.17805	PCP down vs VEH
38096_f_at	HLA-DPB1	major histocompatibility complex, class II, DP beta 1	NM_002121	0.0431454	1	0.741184	0.945448	1	0.999954	1.00463	1.00463	AHA up vs VEH	0.450816	1	0.820158	0.948478	-1.05432	AOL down vs VEH	0.232448	1	0.516024	1.08484	1.08484	HAL up vs VEH	0.536711	1	0.999992	0.959026	-1.04272	OLZ down vs VEH	0.0716739	1	0.999678	0.877296	-1.13987	PCP+OLZ down vs PCP	0.676111	1	0.999419	0.971161	-1.0297	PCP down vs VEH
37576_at	PCP4	Purkinje cell protein 4	NM_006198	0.0432272	1	0.741184	0.0965396	1	0.999954	1.11317	1.11317	AHA up vs VEH	0.873459	1	0.953512	0.989617	-1.01049	AOL down vs VEH	0.00543701	1	0.514474	1.20383	1.20383	HAL up vs VEH	0.0443074	1	0.999992	1.13983	1.13983	OLZ up vs VEH	0.49784	1	0.999678	0.955672	-1.04638	PCP+OLZ down vs PCP	0.212424	1	0.999419	1.08616	1.08616	PCP up vs VEH
41508_at	EGR4	early growth response 4	NM_001965	0.0432919	1	0.741184	0.527878	1	0.999954	1.0353	1.0353	AHA up vs VEH	0.0397201	1	0.81859	0.886926	-1.12749	AOL down vs VEH	0.250391	1	0.517859	1.06563	1.06563	HAL up vs VEH	0.838781	1	0.999992	0.988907	-1.01122	OLZ down vs VEH	0.216186	1	0.999678	1.07477	1.07477	PCP+OLZ up vs PCP	0.132006	1	0.999419	0.916839	-1.0907	PCP down vs VEH
40453_s_at	SFRS5	splicing factor, arginine/serine-rich 5	NM_001039465 /// NM_006925	0.0432978	1	0.741184	0.320162	1	0.999954	1.05396	1.05396	AHA up vs VEH	0.533247	1	0.831673	0.96663	-1.03452	AOL down vs VEH	0.0134775	1	0.514474	1.14478	1.14478	HAL up vs VEH	0.448192	1	0.999992	1.04079	1.04079	OLZ up vs VEH	0.815583	1	0.999678	0.987183	-1.01298	PCP+OLZ down vs PCP	0.846484	1	0.999419	0.989522	-1.01059	PCP down vs VEH
32611_at	PEBP1	phosphatidylethanolamine binding protein 1	NM_002567	0.0434836	1	0.741184	0.418974	1	0.999954	1.0451	1.0451	AHA up vs VEH	0.204601	1	0.81859	0.930447	-1.07475	AOL down vs VEH	0.0538355	1	0.514474	1.11341	1.11341	HAL up vs VEH	0.678437	1	0.999992	1.02281	1.02281	OLZ up vs VEH	0.835419	1	0.999678	0.98818	-1.01196	PCP+OLZ down vs PCP	0.527134	1	0.999419	0.96494	-1.03633	PCP down vs VEH
220_r_at	MAP2	microtubule-associated protein 2	NM_001039538 /// NM_002374 /// NM_031845 /// NM_031847	0.0435243	1	0.741184	0.691861	1	0.999954	0.976001	-1.02459	AHA down vs VEH	0.0218758	1	0.81859	0.860322	-1.16235	AOL down vs VEH	0.536212	1	0.652396	1.0387	1.0387	HAL up vs VEH	0.391032	1	0.999992	0.948592	-1.05419	OLZ down vs VEH	0.0303461	1	0.999678	1.15496	1.15496	PCP+OLZ up vs PCP	0.088498	1	0.999419	0.895707	-1.11644	PCP down vs VEH
40480_s_at	FYN	FYN oncogene related to SRC, FGR, YES	NM_002037 /// NM_153047 /// NM_153048	0.0440726	1	0.741184	0.85343	1	0.999954	0.986023	-1.01418	AHA down vs VEH	0.0782981	1	0.81859	0.867914	-1.15219	AOL down vs VEH	0.231658	1	0.516024	1.09635	1.09635	HAL up vs VEH	0.407566	1	0.999992	1.06543	1.06543	OLZ up vs VEH	0.857248	1	0.999678	1.01453	1.01453	PCP+OLZ up vs PCP	0.206915	1	0.999419	0.90426	-1.10588	PCP down vs VEH
1647_at	IQGAP2	IQ motif containing GTPase activating protein 2	NM_006633	0.044115	1	0.741184	0.331849	1	0.999954	1.05348	1.05348	AHA up vs VEH	0.412726	1	0.819966	0.955603	-1.04646	AOL down vs VEH	0.113673	1	0.514474	1.08961	1.08961	HAL up vs VEH	0.309957	1	0.999992	0.94692	-1.05605	OLZ down vs VEH	0.0608556	1	0.999678	0.897807	-1.11383	PCP+OLZ down vs PCP	0.325542	1	0.999419	1.0562	1.0562	PCP up vs VEH
40193_at	ENO2	enolase 2 (gamma, neuronal)	NM_001975	0.0444144	1	0.741184	0.16376	1	0.999954	1.07908	1.07908	AHA up vs VEH	0.105573	1	0.81859	0.91217	-1.09629	AOL down vs VEH	0.193465	1	0.514474	1.07353	1.07353	HAL up vs VEH	0.172892	1	0.999992	1.07729	1.07729	OLZ up vs VEH	0.180747	1	0.999678	1.07998	1.07998	PCP+OLZ up vs PCP	0.582361	1	0.999419	0.969678	-1.03127	PCP down vs VEH
41097_at	TERF2	telomeric repeat binding factor 2	NM_005652	0.0445046	1	0.741184	0.435271	1	0.999954	1.05234	1.05234	AHA up vs VEH	0.317385	1	0.81859	0.934429	-1.07017	AOL down vs VEH	0.0320575	1	0.514474	1.15487	1.15487	HAL up vs VEH	0.378391	1	0.999992	1.05936	1.05936	OLZ up vs VEH	0.478095	1	0.999678	1.05001	1.05001	PCP+OLZ up vs PCP	0.359835	1	0.999419	0.939776	-1.06408	PCP down vs VEH
36736_f_at	PSPH	phosphoserine phosphatase	NM_004577	0.0445093	1	0.741184	0.469754	1	0.999954	1.03476	1.03476	AHA up vs VEH	0.644778	1	0.867582	0.97775	-1.02276	AOL down vs VEH	0.221614	1	0.514754	1.05988	1.05988	HAL up vs VEH	0.175043	1	0.999992	0.937371	-1.06681	OLZ down vs VEH	0.0218889	1	0.999678	0.888889	-1.125	PCP+OLZ down vs PCP	0.133914	1	0.999419	1.07706	1.07706	PCP up vs VEH
33113_at	CITED2	Cbp/p300-interacting transactivator, with Glu/Asp-rich carboxy-terminal domain,	NM_006079	0.0450521	1	0.741184	0.817518	1	0.999954	0.984551	-1.01569	AHA down vs VEH	0.0521649	1	0.81859	0.870247	-1.1491	AOL down vs VEH	0.403808	1	0.574717	1.05821	1.05821	HAL up vs VEH	0.897678	1	0.999992	1.00871	1.00871	OLZ up vs VEH	0.548061	1	0.999678	1.04369	1.04369	PCP+OLZ up vs PCP	0.0563358	1	0.999419	0.872296	-1.1464	PCP down vs VEH
38420_at	COL5A2	collagen, type V, alpha 2	NM_000393	0.0453112	1	0.741184	0.962857	1	0.999954	1.00319	1.00319	AHA up vs VEH	0.112208	1	0.81859	0.892054	-1.12101	AOL down vs VEH	0.126953	1	0.514474	1.11177	1.11177	HAL up vs VEH	0.973839	1	0.999992	0.997761	-1.00224	OLZ down vs VEH	0.93415	1	0.999678	1.00596	1.00596	PCP+OLZ up vs PCP	0.19525	1	0.999419	0.911445	-1.09716	PCP down vs VEH
32105_f_at	CAMK2G	calcium/calmodulin-dependent protein kinase II gamma	NM_001222 /// NM_172169 /// NM_172170 /// NM_172171 /// NM_172173	0.0453239	1	0.741184	0.591192	1	0.999954	1.02861	1.02861	AHA up vs VEH	0.257126	1	0.81859	0.939895	-1.06395	AOL down vs VEH	0.0490794	1	0.514474	1.11168	1.11168	HAL up vs VEH	0.173494	1	0.999992	1.07491	1.07491	OLZ up vs VEH	0.0739586	1	0.999678	1.106	1.106	PCP+OLZ up vs PCP	0.406131	1	0.999419	0.955699	-1.04635	PCP down vs VEH
2071_s_at	MAPK8	mitogen-activated protein kinase 8	NM_002750 /// NM_139046 /// NM_139047 /// NM_139049	0.0453328	1	0.741184	0.784393	1	0.999954	1.01688	1.01688	AHA up vs VEH	0.353463	1	0.81859	0.942677	-1.06081	AOL down vs VEH	0.0190357	1	0.514474	1.1604	1.1604	HAL up vs VEH	0.502561	1	0.999992	1.04197	1.04197	OLZ up vs VEH	0.694456	1	0.999678	0.975006	-1.02563	PCP+OLZ down vs PCP	0.854961	1	0.999419	0.988489	-1.01165	PCP down vs VEH
1065_at	FLT3	fms-related tyrosine kinase 3	NM_004119	0.0454245	1	0.741184	0.439791	1	0.999954	1.04787	1.04787	AHA up vs VEH	0.106003	1	0.81859	0.902497	-1.10804	AOL down vs VEH	0.12815	1	0.514474	1.09762	1.09762	HAL up vs VEH	0.554455	1	0.999992	0.964914	-1.03636	OLZ down vs VEH	0.645844	1	0.999678	1.02964	1.02964	PCP+OLZ up vs PCP	0.248778	1	0.999419	0.929924	-1.07536	PCP down vs VEH
893_at	UBE2S	ubiquitin-conjugating enzyme E2S	NM_014501	0.045444	1	0.741184	0.909981	1	0.999954	1.00668	1.00668	AHA up vs VEH	0.283795	1	0.81859	0.936308	-1.06802	AOL down vs VEH	0.228883	1	0.516024	1.07417	1.07417	HAL up vs VEH	0.641135	1	0.999992	1.02787	1.02787	OLZ up vs VEH	0.0158937	1	0.999678	1.16823	1.16823	PCP+OLZ up vs PCP	0.0265795	1	0.999419	0.869511	-1.15007	PCP down vs VEH
33997_at	GAB1	GRB2-associated binding protein 1	NM_002039 /// NM_207123	0.0454494	1	0.741184	0.308839	1	0.999954	1.06399	1.06399	AHA up vs VEH	0.469519	1	0.821908	0.955569	-1.0465	AOL down vs VEH	0.0373264	1	0.514474	1.13854	1.13854	HAL up vs VEH	0.599626	1	0.999992	0.96867	-1.03234	OLZ down vs VEH	0.182342	1	0.999678	0.917597	-1.0898	PCP+OLZ down vs PCP	0.577801	1	0.999419	1.03558	1.03558	PCP up vs VEH
38976_at	CORO1A	coronin, actin binding protein, 1A	NM_007074	0.0456177	1	0.741184	0.818992	1	0.999954	1.01176	1.01176	AHA up vs VEH	0.0695045	1	0.81859	0.906576	-1.10305	AOL down vs VEH	0.386353	1	0.567314	1.04548	1.04548	HAL up vs VEH	0.632739	1	0.999992	1.02475	1.02475	OLZ up vs VEH	0.0314973	1	0.999678	1.12675	1.12675	PCP+OLZ up vs PCP	0.049062	1	0.999419	0.898633	-1.1128	PCP down vs VEH
33321_r_at	TPSAB1 /// TPSB2	tryptase alpha/beta 1 /// tryptase beta 2	NM_003294 /// NM_024164	0.0456281	1	0.741184	0.365241	1	0.999954	1.04469	1.04469	AHA up vs VEH	0.245666	1	0.81859	0.943455	-1.05993	AOL down vs VEH	0.236655	1	0.516024	1.05905	1.05905	HAL up vs VEH	0.638506	1	0.999992	1.02285	1.02285	OLZ up vs VEH	0.0405628	1	0.999678	1.11239	1.11239	PCP+OLZ up vs PCP	0.046213	1	0.999419	0.903172	-1.10721	PCP down vs VEH
32688_at	PTGER3	prostaglandin E receptor 3 (subtype EP3)	NM_000957 /// NM_001126044 /// NM_198712 /// NM_198713 /// NM_198714 /// NM_1987	0.045696	1	0.741184	0.452375	1	0.999954	1.0435	1.0435	AHA up vs VEH	0.915543	1	0.968153	1.00621	1.00621	AOL up vs VEH	0.00730157	1	0.514474	1.17232	1.17232	HAL up vs VEH	0.75388	1	0.999992	0.982446	-1.01787	OLZ down vs VEH	0.275129	1	0.999678	0.936716	-1.06756	PCP+OLZ down vs PCP	0.271883	1	0.999419	1.0669	1.0669	PCP up vs VEH
36137_at	CHD4	chromodomain helicase DNA binding protein 4	NM_001273	0.045882	1	0.741184	0.575066	1	0.999954	1.03323	1.03323	AHA up vs VEH	0.403999	1	0.819966	0.950777	-1.05177	AOL down vs VEH	0.0396867	1	0.514474	1.13106	1.13106	HAL up vs VEH	0.235529	1	0.999992	1.07217	1.07217	OLZ up vs VEH	0.375773	1	0.999678	0.946911	-1.05607	PCP+OLZ down vs PCP	0.978406	1	0.999419	0.99837	-1.00163	PCP down vs VEH
752_s_at	DNAJB1	DnaJ (Hsp40) homolog, subfamily B, member 1	NM_006145	0.04653	1	0.741184	0.778724	1	0.999954	0.983216	-1.01707	AHA down vs VEH	0.0127888	1	0.81859	0.8507	-1.1755	AOL down vs VEH	0.380627	1	0.563698	1.05449	1.05449	HAL up vs VEH	0.816907	1	0.999992	0.986152	-1.01404	OLZ down vs VEH	0.292005	1	0.999678	1.06961	1.06961	PCP+OLZ up vs PCP	0.131063	1	0.999419	0.908822	-1.10033	PCP down vs VEH
823_at	CX3CL1	chemokine (C-X3-C motif) ligand 1	NM_002996	0.0465763	1	0.741184	0.0850634	1	0.999954	1.10855	1.10855	AHA up vs VEH	0.308301	1	0.81859	0.939634	-1.06424	AOL down vs VEH	0.0681519	1	0.514474	1.11563	1.11563	HAL up vs VEH	0.113	1	0.999992	1.09917	1.09917	OLZ up vs VEH	0.460995	1	0.999678	1.04676	1.04676	PCP+OLZ up vs PCP	0.700556	1	0.999419	0.976881	-1.02367	PCP down vs VEH
35937_at	MICB	MHC class I polypeptide-related sequence B	NM_005931	0.0466473	1	0.741184	0.0494125	1	0.999954	1.14879	1.14879	AHA up vs VEH	0.432992	1	0.819966	0.945513	-1.05763	AOL down vs VEH	0.183518	1	0.514474	1.09699	1.09699	HAL up vs VEH	0.922823	1	0.999992	1.00669	1.00669	OLZ up vs VEH	0.0526036	1	0.999678	0.865937	-1.15482	PCP+OLZ down vs PCP	0.0615951	1	0.999419	1.14606	1.14606	PCP up vs VEH
37449_i_at	GNAS	GNAS complex locus	NM_000516 /// NM_001077488 /// NM_001077489 /// NM_001077490 /// NM_016592 /// N	0.0466504	1	0.741184	0.455941	1	0.999954	0.960504	-1.04112	AHA down vs VEH	0.0428688	1	0.81859	0.890505	-1.12296	AOL down vs VEH	0.257338	1	0.520268	1.06345	1.06345	HAL up vs VEH	0.981208	1	0.999992	1.00127	1.00127	OLZ up vs VEH	0.0575732	1	0.999678	1.11661	1.11661	PCP+OLZ up vs PCP	0.181382	1	0.999419	0.927335	-1.07836	PCP down vs VEH
37292_at	MAML1	mastermind-like 1 (Drosophila)	NM_014757	0.046948	1	0.741184	0.471749	1	0.999954	1.048	1.048	AHA up vs VEH	0.0738558	1	0.81859	0.884551	-1.13052	AOL down vs VEH	0.0738435	1	0.514474	1.1259	1.1259	HAL up vs VEH	0.719988	1	0.999992	1.02357	1.02357	OLZ up vs VEH	0.693988	1	0.999678	1.02729	1.02729	PCP+OLZ up vs PCP	0.552771	1	0.999419	0.960775	-1.04083	PCP down vs VEH
32315_at	RPS24	ribosomal protein S24	NM_001026 /// NM_001142282 /// NM_001142283 /// NM_001142284 /// NM_001142285 //	0.047055	1	0.741184	0.282074	1	0.999954	1.05905	1.05905	AHA up vs VEH	0.598693	1	0.855093	0.971541	-1.02929	AOL down vs VEH	0.0315118	1	0.514474	1.12459	1.12459	HAL up vs VEH	0.702882	1	0.999992	1.02041	1.02041	OLZ up vs VEH	0.239394	1	0.999678	1.06841	1.06841	PCP+OLZ up vs PCP	0.213016	1	0.999419	0.933346	-1.07141	PCP down vs VEH
1289_at	GSTM5	glutathione S-transferase mu 5	NM_000851	0.0472359	1	0.741184	0.721413	1	0.999954	0.979107	-1.02134	AHA down vs VEH	0.0980161	1	0.81859	0.901992	-1.10866	AOL down vs VEH	0.0875859	1	0.514474	1.10856	1.10856	HAL up vs VEH	0.63	1	0.999992	1.02896	1.02896	OLZ up vs VEH	0.528204	1	0.999678	1.04018	1.04018	PCP+OLZ up vs PCP	0.262204	1	0.999419	0.93306	-1.07174	PCP down vs VEH
32694_at	RARB	retinoic acid receptor, beta	NM_000965 /// NM_016152	0.0474788	1	0.741184	0.315572	1	0.999954	1.06128	1.06128	AHA up vs VEH	0.708794	1	0.890482	0.97749	-1.02303	AOL down vs VEH	0.0170279	1	0.514474	1.15715	1.15715	HAL up vs VEH	0.364862	1	0.999992	1.0551	1.0551	OLZ up vs VEH	0.38806	1	0.999678	0.947657	-1.05523	PCP+OLZ down vs PCP	0.899777	1	0.999419	1.00771	1.00771	PCP up vs VEH
40328_at	TWIST1	twist homolog 1 (Drosophila)	NM_000474	0.0477476	1	0.741184	0.426876	1	0.999954	1.05168	1.05168	AHA up vs VEH	0.0249869	1	0.81859	0.859417	-1.16358	AOL down vs VEH	0.338966	1	0.549899	1.06264	1.06264	HAL up vs VEH	0.995194	1	0.999992	0.99962	-1.00038	OLZ down vs VEH	0.286827	1	0.999678	1.07397	1.07397	PCP+OLZ up vs PCP	0.253305	1	0.999419	0.927392	-1.07829	PCP down vs VEH
39549_at	NPAS2	neuronal PAS domain protein 2	NM_002518	0.0477562	1	0.741184	0.183183	1	0.999954	1.07413	1.07413	AHA up vs VEH	0.0901736	1	0.81859	0.909478	-1.09953	AOL down vs VEH	0.163094	1	0.514474	1.07791	1.07791	HAL up vs VEH	0.691168	1	0.999992	0.979107	-1.02134	OLZ down vs VEH	0.840903	1	0.999678	1.01129	1.01129	PCP+OLZ up vs PCP	0.547096	1	0.999419	0.967353	-1.03375	PCP down vs VEH
32197_at	SLC25A11	solute carrier family 25 (mitochondrial carrier; oxoglutarate carrier), member 1	NM_003562	0.0478393	1	0.741184	0.22469	1	0.999954	1.06773	1.06773	AHA up vs VEH	0.22256	1	0.81859	0.934145	-1.0705	AOL down vs VEH	0.0731134	1	0.514474	1.10282	1.10282	HAL up vs VEH	0.0956347	1	0.999992	1.09498	1.09498	OLZ up vs VEH	0.654899	1	0.999678	1.02551	1.02551	PCP+OLZ up vs PCP	0.732935	1	0.999419	0.981272	-1.01908	PCP down vs VEH
36201_at	GLO1	glyoxalase I	NM_006708	0.04826	1	0.741184	0.381456	1	0.999954	1.05974	1.05974	AHA up vs VEH	0.144047	1	0.81859	0.903829	-1.1064	AOL down vs VEH	0.183939	1	0.514474	1.09272	1.09272	HAL up vs VEH	0.168828	1	0.999992	1.09626	1.09626	OLZ up vs VEH	0.510363	1	0.999678	0.955193	-1.04691	PCP+OLZ down vs PCP	0.841314	1	0.999419	0.986413	-1.01377	PCP down vs VEH
31687_f_at	HBB	hemoglobin, beta	NM_000518	0.0482747	1	0.741184	0.0917694	1	0.999954	1.09731	1.09731	AHA up vs VEH	0.841869	1	0.938686	0.988906	-1.01122	AOL down vs VEH	0.0289275	1	0.514474	1.12963	1.12963	HAL up vs VEH	0.12523	1	0.999992	1.0878	1.0878	OLZ up vs VEH	0.0248399	1	0.999678	1.14117	1.14117	PCP+OLZ up vs PCP	0.508749	1	0.999419	0.963588	-1.03779	PCP down vs VEH
41231_f_at	HMGN2	high-mobility group nucleosomal binding domain 2	NM_005517	0.0482747	1	0.741184	0.905844	1	0.999954	0.992995	-1.00705	AHA down vs VEH	0.21395	1	0.81859	0.925704	-1.08026	AOL down vs VEH	0.0886935	1	0.514474	1.10865	1.10865	HAL up vs VEH	0.655286	1	0.999992	1.02692	1.02692	OLZ up vs VEH	0.982442	1	0.999678	0.998624	-1.00138	PCP+OLZ down vs PCP	0.260246	1	0.999419	0.932502	-1.07238	PCP down vs VEH
40512_at	CHN1	chimerin (chimaerin) 1	NM_001025201 /// NM_001822	0.0484759	1	0.741184	0.696219	1	0.999954	1.02357	1.02357	AHA up vs VEH	0.344014	1	0.81859	0.942975	-1.06047	AOL down vs VEH	0.0460468	1	0.514474	1.12993	1.12993	HAL up vs VEH	0.53848	1	0.999992	1.03745	1.03745	OLZ up vs VEH	0.113597	1	0.999678	1.10627	1.10627	PCP+OLZ up vs PCP	0.150767	1	0.999419	0.913971	-1.09413	PCP down vs VEH
36666_at	P4HB	prolyl 4-hydroxylase, beta polypeptide	NM_000918	0.0485848	1	0.741184	0.20375	1	0.999954	1.08311	1.08311	AHA up vs VEH	0.204037	1	0.81859	0.920767	-1.08605	AOL down vs VEH	0.0226783	1	0.514474	1.15795	1.15795	HAL up vs VEH	0.674781	1	0.999992	1.02645	1.02645	OLZ up vs VEH	0.984401	1	0.999678	1.00128	1.00128	PCP+OLZ up vs PCP	0.755849	1	0.999419	1.02023	1.02023	PCP up vs VEH
38802_at	PGRMC1	progesterone receptor membrane component 1	NM_006667	0.0487099	1	0.741184	0.644279	1	0.999954	1.02688	1.02688	AHA up vs VEH	0.222512	1	0.81859	0.929482	-1.07587	AOL down vs VEH	0.0355863	1	0.514474	1.13224	1.13224	HAL up vs VEH	0.753742	1	0.999992	1.01817	1.01817	OLZ up vs VEH	0.119207	1	0.999678	1.10038	1.10038	PCP+OLZ up vs PCP	0.309384	1	0.999419	0.940992	-1.06271	PCP down vs VEH
40777_at	CTNNB1	catenin (cadherin-associated protein), beta 1, 88kDa	NM_001098209 /// NM_001098210 /// NM_001904	0.0489942	1	0.741184	0.955422	1	0.999954	1.00369	1.00369	AHA up vs VEH	0.216732	1	0.81859	0.918499	-1.08873	AOL down vs VEH	0.294495	1	0.532544	1.07201	1.07201	HAL up vs VEH	0.665615	1	0.999992	1.0289	1.0289	OLZ up vs VEH	0.117119	1	0.999678	1.11676	1.11676	PCP+OLZ up vs PCP	0.0265069	1	0.999419	0.855206	-1.16931	PCP down vs VEH
32456_s_at	ATP2B3	ATPase, Ca++ transporting, plasma membrane 3	NM_001001344 /// NM_021949	0.0496549	1	0.741184	0.879848	1	0.999954	1.00863	1.00863	AHA up vs VEH	0.121562	1	0.81859	0.911606	-1.09696	AOL down vs VEH	0.0491456	1	0.514474	1.12165	1.12165	HAL up vs VEH	0.915308	1	0.999992	1.00607	1.00607	OLZ up vs VEH	0.187268	1	0.999678	1.08314	1.08314	PCP+OLZ up vs PCP	0.77963	1	0.999419	0.983649	-1.01662	PCP down vs VEH
1844_s_at	MAP2K1	mitogen-activated protein kinase kinase 1	NM_002755	0.0498917	1	0.741184	0.833948	1	0.999954	0.986198	-1.01399	AHA down vs VEH	0.650552	1	0.868365	0.969376	-1.03159	AOL down vs VEH	0.0750164	1	0.514474	1.12809	1.12809	HAL up vs VEH	0.746193	1	0.999992	1.0217	1.0217	OLZ up vs VEH	0.0691511	1	0.999678	1.13843	1.13843	PCP+OLZ up vs PCP	0.0564866	1	0.999419	0.874457	-1.14357	PCP down vs VEH
1252_at	REEP5	receptor accessory protein 5	NM_005669	0.0501827	1	0.741184	0.16823	1	0.999954	1.08923	1.08923	AHA up vs VEH	0.31506	1	0.81859	0.937919	-1.06619	AOL down vs VEH	0.0402606	1	0.514474	1.13794	1.13794	HAL up vs VEH	0.173027	1	0.999992	1.08817	1.08817	OLZ up vs VEH	0.811196	1	0.999678	1.01553	1.01553	PCP+OLZ up vs PCP	0.774675	1	0.999419	0.981994	-1.01834	PCP down vs VEH
35843_at	NEK9	NIMA (never in mitosis gene a)- related kinase 9	NM_033116	0.0502233	1	0.741184	0.964364	1	0.999954	0.997405	-1.0026	AHA down vs VEH	0.036855	1	0.81859	0.878692	-1.13805	AOL down vs VEH	0.379518	1	0.563687	1.05271	1.05271	HAL up vs VEH	0.398311	1	0.999992	0.951843	-1.05059	OLZ down vs VEH	0.816854	1	0.999678	0.985915	-1.01429	PCP+OLZ down vs PCP	0.164092	1	0.999419	0.9186	-1.08861	PCP down vs VEH
37962_r_at	STXBP3	syntaxin binding protein 3	NM_007269	0.0504418	1	0.741184	0.777887	1	0.999954	1.01692	1.01692	AHA up vs VEH	0.274312	1	0.81859	0.934464	-1.07013	AOL down vs VEH	0.125094	1	0.514474	1.09706	1.09706	HAL up vs VEH	0.775124	1	0.999992	0.983149	-1.01714	OLZ down vs VEH	0.127795	1	0.999678	0.907723	-1.10166	PCP+OLZ down vs PCP	0.843711	1	0.999419	0.98793	-1.01222	PCP down vs VEH
32466_at	RPL41	ribosomal protein L41	NM_001035267 /// NM_021104	0.0505907	1	0.741184	0.18568	1	0.999954	1.06953	1.06953	AHA up vs VEH	0.211522	1	0.81859	1.06776	1.06776	AOL up vs VEH	0.01213	1	0.514474	1.14039	1.14039	HAL up vs VEH	0.038167	1	0.999992	1.11305	1.11305	OLZ up vs VEH	0.099355	1	0.999678	1.09274	1.09274	PCP+OLZ up vs PCP	0.543389	1	0.999419	0.968824	-1.03218	PCP down vs VEH
32548_at	PTGES3	prostaglandin E synthase 3 (cytosolic)	NM_006601	0.0506555	1	0.741184	0.218854	1	0.999954	0.917415	-1.09002	AHA down vs VEH	0.221198	1	0.81859	0.915106	-1.09277	AOL down vs VEH	0.429072	1	0.586029	1.05665	1.05665	HAL up vs VEH	0.13363	1	0.999992	0.899722	-1.11145	OLZ down vs VEH	0.144005	1	0.999678	1.11436	1.11436	PCP+OLZ up vs PCP	0.014865	1	0.999419	0.833426	-1.19987	PCP down vs VEH
32825_at	PRMT1	protein arginine methyltransferase 1	NM_001536 /// NM_198318 /// NM_198319	0.0507613	1	0.741184	0.877471	1	0.999954	1.0106	1.0106	AHA up vs VEH	0.253615	1	0.81859	0.921732	-1.08491	AOL down vs VEH	0.147915	1	0.514474	1.10559	1.10559	HAL up vs VEH	0.550971	1	0.999992	1.04174	1.04174	OLZ up vs VEH	0.519564	1	0.999678	1.04761	1.04761	PCP+OLZ up vs PCP	0.103772	1	0.999419	0.889297	-1.12448	PCP down vs VEH
40901_at	STRN3	striatin, calmodulin binding protein 3	NM_001083893 /// NM_014574	0.0507802	1	0.741184	0.903374	1	0.999954	0.992734	-1.00732	AHA down vs VEH	0.179091	1	0.81859	0.918972	-1.08817	AOL down vs VEH	0.0955036	1	0.514474	1.10739	1.10739	HAL up vs VEH	0.984107	1	0.999992	1.0012	1.0012	OLZ up vs VEH	0.581625	1	0.999678	0.965688	-1.03553	PCP+OLZ down vs PCP	0.400047	1	0.999419	0.948761	-1.05401	PCP down vs VEH
1366_i_at	UBC	ubiquitin C	NM_021009	0.0508022	1	0.741184	0.582272	1	0.999954	1.04371	1.04371	AHA up vs VEH	0.490948	1	0.824989	0.946026	-1.05705	AOL down vs VEH	0.0387943	1	0.514474	1.17944	1.17944	HAL up vs VEH	0.357073	1	0.999992	1.07453	1.07453	OLZ up vs VEH	0.605433	1	0.999678	1.0432	1.0432	PCP+OLZ up vs PCP	0.294691	1	0.999419	0.918643	-1.08856	PCP down vs VEH
39746_at	POLR2B	polymerase (RNA) II (DNA directed) polypeptide B, 140kDa	NM_000938	0.0512843	1	0.741184	0.794485	1	0.999954	1.01468	1.01468	AHA up vs VEH	0.0442525	1	0.81859	0.887306	-1.12701	AOL down vs VEH	0.115794	1	0.514474	1.09351	1.09351	HAL up vs VEH	0.95253	1	0.999992	0.996677	-1.00333	OLZ down vs VEH	0.385304	1	0.999678	1.0527	1.0527	PCP+OLZ up vs PCP	0.363273	1	0.999419	0.948439	-1.05436	PCP down vs VEH
31482_at	CELP	carboxyl ester lipase pseudogene	NR_001275	0.0513336	1	0.741184	0.729873	1	0.999954	1.01871	1.01871	AHA up vs VEH	0.0329039	1	0.81859	0.8851	-1.12982	AOL down vs VEH	0.250899	1	0.517859	1.0641	1.0641	HAL up vs VEH	0.728659	1	0.999992	0.98155	-1.0188	OLZ down vs VEH	0.419098	1	0.999678	1.04689	1.04689	PCP+OLZ up vs PCP	0.16483	1	0.999419	0.92481	-1.0813	PCP down vs VEH
34624_at	CDKN2B	cyclin-dependent kinase inhibitor 2B (p15, inhibits CDK4)	NM_004936 /// NM_078487	0.0515549	1	0.741184	0.79264	1	0.999954	1.01356	1.01356	AHA up vs VEH	0.0223073	1	0.81859	0.882182	-1.13355	AOL down vs VEH	0.695197	1	0.764919	1.02028	1.02028	HAL up vs VEH	0.144193	1	0.999992	0.92697	-1.07878	OLZ down vs VEH	0.619523	1	0.999678	0.97355	-1.02717	PCP+OLZ down vs PCP	0.272604	1	0.999419	0.943045	-1.06039	PCP down vs VEH
37139_at	EDA	ectodysplasin A	NM_001005609 /// NM_001005610 /// NM_001005611 /// NM_001005612 /// NM_001005615	0.0515951	1	0.741184	0.155431	1	0.999954	1.07863	1.07863	AHA up vs VEH	0.226979	1	0.81859	0.935802	-1.0686	AOL down vs VEH	0.0295919	1	0.514474	1.12531	1.12531	HAL up vs VEH	0.508099	1	0.999992	1.03551	1.03551	OLZ up vs VEH	0.468145	1	0.999678	1.04112	1.04112	PCP+OLZ up vs PCP	0.83935	1	0.999419	0.98902	-1.0111	PCP down vs VEH
38945_at	MTF1	metal-regulatory transcription factor 1	NM_005955	0.0516239	1	0.741184	0.474301	1	0.999954	1.04429	1.04429	AHA up vs VEH	0.398725	1	0.819966	0.948425	-1.05438	AOL down vs VEH	0.116899	1	0.514474	1.10099	1.10099	HAL up vs VEH	0.174777	1	0.999992	1.08646	1.08646	OLZ up vs VEH	0.922573	1	0.999678	1.0062	1.0062	PCP+OLZ up vs PCP	0.337138	1	0.999419	0.941408	-1.06224	PCP down vs VEH
1591_s_at	IGF2 /// INS-IGF2	insulin-like growth factor 2 (somatomedin A) /// INS-IGF2 readthrough transcript	NM_000612 /// NM_001007139 /// NM_001042376 /// NM_001127598 /// NR_003512	0.0517997	1	0.741184	0.292136	1	0.999954	1.07478	1.07478	AHA up vs VEH	0.371529	1	0.81859	0.938798	-1.06519	AOL down vs VEH	0.0150989	1	0.514474	1.18746	1.18746	HAL up vs VEH	0.680645	1	0.999992	1.02839	1.02839	OLZ up vs VEH	0.983043	1	0.999678	1.00152	1.00152	PCP+OLZ up vs PCP	0.931019	1	0.999419	0.993926	-1.00611	PCP down vs VEH
32335_r_at	UBC	ubiquitin C	NM_021009	0.0519273	1	0.741184	0.68114	1	0.999954	1.02323	1.02323	AHA up vs VEH	0.255984	1	0.81859	0.935957	-1.06843	AOL down vs VEH	0.0828334	1	0.514474	1.10386	1.10386	HAL up vs VEH	0.71294	1	0.999992	0.979649	-1.02077	OLZ down vs VEH	0.102426	1	0.999678	1.10267	1.10267	PCP+OLZ up vs PCP	0.101204	1	0.999419	0.908004	-1.10132	PCP down vs VEH
1642_at	MTA1	metastasis associated 1	NM_004689	0.0520262	1	0.741184	0.486646	1	0.999954	0.962713	-1.03873	AHA down vs VEH	0.00586654	1	0.81859	0.849272	-1.17748	AOL down vs VEH	0.969718	1	0.978327	1.00207	1.00207	HAL up vs VEH	0.287987	1	0.999992	0.943375	-1.06002	OLZ down vs VEH	0.127409	1	0.999678	1.09281	1.09281	PCP+OLZ up vs PCP	0.035972	1	0.999419	0.885308	-1.12955	PCP down vs VEH
41155_at	CTNNA1	catenin (cadherin-associated protein), alpha 1, 102kDa	NM_001903	0.0520417	1	0.741184	0.339409	1	0.999954	1.0743	1.0743	AHA up vs VEH	0.260416	1	0.81859	0.916168	-1.0915	AOL down vs VEH	0.0917784	1	0.514474	1.13671	1.13671	HAL up vs VEH	0.457805	1	0.999992	1.05714	1.05714	OLZ up vs VEH	0.91427	1	0.999678	0.991584	-1.00849	PCP+OLZ down vs PCP	0.420902	1	0.999419	0.93948	-1.06442	PCP down vs VEH
429_f_at	TUBB4	tubulin, beta 4	NM_006087	0.0521375	1	0.741184	0.866736	1	0.999954	1.00947	1.00947	AHA up vs VEH	0.201675	1	0.81859	0.927765	-1.07786	AOL down vs VEH	0.448479	1	0.597547	1.04364	1.04364	HAL up vs VEH	0.298771	1	0.999992	1.06052	1.06052	OLZ up vs VEH	0.00693557	1	0.999678	1.18253	1.18253	PCP+OLZ up vs PCP	0.08652	1	0.999419	0.90334	-1.107	PCP down vs VEH
39877_at	KCNC4	Potassium voltage-gated channel, Shaw-related subfamily, member 4	NM_001039574 /// NM_004978 /// NM_153763	0.0524576	1	0.741184	0.692824	1	0.999954	1.02526	1.02526	AHA up vs VEH	0.34049	1	0.81859	0.939325	-1.06459	AOL down vs VEH	0.0486214	1	0.514474	1.1362	1.1362	HAL up vs VEH	0.913278	1	0.999992	0.993152	-1.00689	OLZ down vs VEH	0.827299	1	0.999678	1.0146	1.0146	PCP+OLZ up vs PCP	0.287709	1	0.999419	0.932397	-1.07251	PCP down vs VEH
31829_r_at	TGOLN2	trans-golgi network protein 2	NM_006464	0.0525364	1	0.741184	0.0725591	1	0.999954	1.12835	1.12835	AHA up vs VEH	0.156385	1	0.81859	1.10275	1.10275	AOL up vs VEH	0.0957455	1	0.514474	1.11817	1.11817	HAL up vs VEH	0.0641234	1	0.999992	1.13278	1.13278	OLZ up vs VEH	0.357772	1	0.999678	1.06618	1.06618	PCP+OLZ up vs PCP	0.396269	1	0.999419	0.943552	-1.05983	PCP down vs VEH
36215_at	PRKACB	protein kinase, cAMP-dependent, catalytic, beta	NM_002731 /// NM_182948 /// NM_207578	0.0525722	1	0.741184	0.264488	1	0.999954	0.940059	-1.06376	AHA down vs VEH	0.208244	1	0.81859	0.930266	-1.07496	AOL down vs VEH	0.979905	1	0.985259	1.00138	1.00138	HAL up vs VEH	0.497674	1	0.999992	0.963319	-1.03808	OLZ down vs VEH	0.00458491	1	0.999678	1.18903	1.18903	PCP+OLZ up vs PCP	0.00415885	1	0.941429	0.841645	-1.18815	PCP down vs VEH
32788_at	RANBP2	RAN binding protein 2	NM_006267	0.0525759	1	0.741184	0.429821	1	0.999954	1.05435	1.05435	AHA up vs VEH	0.632459	1	0.863824	0.967459	-1.03364	AOL down vs VEH	0.0172205	1	0.514474	1.17963	1.17963	HAL up vs VEH	0.203217	1	0.999992	1.08966	1.08966	OLZ up vs VEH	0.625122	1	0.999678	1.03499	1.03499	PCP+OLZ up vs PCP	0.55991	1	0.999419	0.960406	-1.04123	PCP down vs VEH
36992_at	TXN	thioredoxin	NM_003329	0.0527047	1	0.741184	0.847624	1	0.999954	1.01048	1.01048	AHA up vs VEH	0.612679	1	0.857665	0.971941	-1.02887	AOL down vs VEH	0.0109945	1	0.514474	1.15499	1.15499	HAL up vs VEH	0.40706	1	0.999992	1.04622	1.04622	OLZ up vs VEH	0.353207	1	0.999678	1.05477	1.05477	PCP+OLZ up vs PCP	0.564728	1	0.999419	0.968095	-1.03296	PCP down vs VEH
36990_at	UCHL1	ubiquitin carboxyl-terminal esterase L1 (ubiquitin thiolesterase)	NM_004181	0.0528248	1	0.741184	0.727966	1	0.999954	1.01906	1.01906	AHA up vs VEH	0.170935	1	0.81859	0.925135	-1.08092	AOL down vs VEH	0.0972301	1	0.514474	1.09597	1.09597	HAL up vs VEH	0.110809	1	0.999992	1.09198	1.09198	OLZ up vs VEH	0.364063	1	0.999678	1.05351	1.05351	PCP+OLZ up vs PCP	0.486877	1	0.999419	0.961565	-1.03997	PCP down vs VEH
2052_g_at	MGMT	O-6-methylguanine-DNA methyltransferase	NM_002412	0.0531517	1	0.741184	0.892459	1	0.999954	0.990218	-1.00988	AHA down vs VEH	0.208461	1	0.81859	0.908813	-1.10034	AOL down vs VEH	0.0436905	1	0.514474	1.16266	1.16266	HAL up vs VEH	0.753693	1	0.999992	1.02309	1.02309	OLZ up vs VEH	0.991989	1	0.999678	1.00077	1.00077	PCP+OLZ up vs PCP	0.473552	1	0.999419	0.947284	-1.05565	PCP down vs VEH
33447_at	MYL12A	myosin, light chain 12A, regulatory, non-sarcomeric	NM_006471	0.0533478	1	0.741184	0.775096	1	0.999954	1.01775	1.01775	AHA up vs VEH	0.40843	1	0.819966	0.948499	-1.0543	AOL down vs VEH	0.0354389	1	0.514474	1.14265	1.14265	HAL up vs VEH	0.958284	1	0.999992	1.00322	1.00322	OLZ up vs VEH	0.709257	1	0.999678	1.02448	1.02448	PCP+OLZ up vs PCP	0.297458	1	0.999419	0.935292	-1.06918	PCP down vs VEH
38285_at	CRYM	crystallin, mu	NM_001014444 /// NM_001888	0.0535179	1	0.741184	0.370125	1	0.999954	1.05942	1.05942	AHA up vs VEH	0.702813	1	0.889207	1.02563	1.02563	AOL up vs VEH	0.0122348	1	0.514474	1.18225	1.18225	HAL up vs VEH	0.0493546	1	0.999992	1.13793	1.13793	OLZ up vs VEH	0.81057	1	0.999678	0.983959	-1.0163	PCP+OLZ down vs PCP	0.929217	1	0.999419	1.00591	1.00591	PCP up vs VEH
2010_at	SKP1	S-phase kinase-associated protein 1	NM_006930 /// NM_170679	0.0535323	1	0.741184	0.738225	1	0.999954	1.02297	1.02297	AHA up vs VEH	0.483425	1	0.82487	0.951815	-1.05062	AOL down vs VEH	0.0696132	1	0.514474	1.1342	1.1342	HAL up vs VEH	0.857157	1	0.999992	0.987852	-1.0123	OLZ down vs VEH	0.0409792	1	0.999678	1.16211	1.16211	PCP+OLZ up vs PCP	0.0801777	1	0.999419	0.881986	-1.13381	PCP down vs VEH
32219_at	TLK1	tousled-like kinase 1	NM_001136554 /// NM_001136555 /// NM_012290	0.0535378	1	0.741184	0.0718231	1	0.999954	1.12596	1.12596	AHA up vs VEH	0.424941	1	0.819966	0.947947	-1.05491	AOL down vs VEH	0.0250586	1	0.514474	1.16118	1.16118	HAL up vs VEH	0.404764	1	0.999992	1.05546	1.05546	OLZ up vs VEH	0.599579	1	0.999678	0.964921	-1.03635	PCP+OLZ down vs PCP	0.619129	1	0.999419	1.03381	1.03381	PCP up vs VEH
37291_r_at	SNCA	synuclein, alpha (non A4 component of amyloid precursor)	NM_000345 /// NM_001146054 /// NM_001146055 /// NM_007308	0.0535416	1	0.741184	0.257142	1	0.999954	1.0639	1.0639	AHA up vs VEH	0.528471	1	0.830526	1.03607	1.03607	AOL up vs VEH	0.00193957	1	0.514474	1.19638	1.19638	HAL up vs VEH	0.635578	1	0.999992	1.02606	1.02606	OLZ up vs VEH	0.700062	1	0.999678	0.978237	-1.02225	PCP+OLZ down vs PCP	0.154338	1	0.999419	1.08442	1.08442	PCP up vs VEH
1913_at	CCNG2	cyclin G2	NM_004354	0.0536075	1	0.741184	0.910972	1	0.999954	0.991078	-1.009	AHA down vs VEH	0.475672	1	0.82373	0.942381	-1.06114	AOL down vs VEH	0.0911287	1	0.514474	1.148	1.148	HAL up vs VEH	0.747021	1	0.999992	1.02621	1.02621	OLZ up vs VEH	0.233557	1	0.999678	1.1068	1.1068	PCP+OLZ up vs PCP	0.0703171	1	0.999419	0.857636	-1.166	PCP down vs VEH
33132_at	CPSF1	cleavage and polyadenylation specific factor 1, 160kDa	NM_013291	0.0536796	1	0.741184	0.731907	1	0.999954	0.980326	-1.02007	AHA down vs VEH	0.0313263	1	0.81859	0.875315	-1.14245	AOL down vs VEH	0.593476	1	0.688616	0.96948	-1.03148	HAL down vs VEH	0.190671	1	0.999992	1.07973	1.07973	OLZ up vs VEH	0.279066	1	0.999678	1.06883	1.06883	PCP+OLZ up vs PCP	0.202894	1	0.999419	0.925642	-1.08033	PCP down vs VEH
37283_at	MN1	meningioma (disrupted in balanced translocation) 1	NM_002430	0.053686	1	0.741184	0.212018	1	0.999954	1.08778	1.08778	AHA up vs VEH	0.597442	1	0.854991	0.964139	-1.0372	AOL down vs VEH	0.0196306	1	0.514474	1.17526	1.17526	HAL up vs VEH	0.295152	1	0.999992	1.0729	1.0729	OLZ up vs VEH	0.892649	1	0.999678	1.00953	1.00953	PCP+OLZ up vs PCP	0.697312	1	0.999419	0.973453	-1.02727	PCP down vs VEH
32696_at	PBX3	pre-B-cell leukemia homeobox 3	NM_001134778 /// NM_006195 /// NR_024122 /// NR_024123	0.0537969	1	0.741184	0.47346	1	0.999954	1.03725	1.03725	AHA up vs VEH	0.772976	1	0.912991	0.984933	-1.0153	AOL down vs VEH	0.0432446	1	0.514474	1.1114	1.1114	HAL up vs VEH	0.368817	1	0.999992	0.955104	-1.04701	OLZ down vs VEH	0.430648	1	0.999678	0.958528	-1.04327	PCP+OLZ down vs PCP	0.887169	1	0.999419	0.992556	-1.0075	PCP down vs VEH
38682_at	BAP1	BRCA1 associated protein-1 (ubiquitin carboxy-terminal hydrolase)	NM_004656	0.0542185	1	0.741184	0.671152	1	0.999954	1.02028	1.02028	AHA up vs VEH	0.11215	1	0.81859	0.924075	-1.08216	AOL down vs VEH	0.102722	1	0.514474	1.08163	1.08163	HAL up vs VEH	0.803985	1	0.999992	0.988339	-1.0118	OLZ down vs VEH	0.624537	1	0.999678	1.02468	1.02468	PCP+OLZ up vs PCP	0.233733	1	0.999419	0.942879	-1.06058	PCP down vs VEH
38855_s_at	OLFM1	olfactomedin 1	NM_006334 /// NM_014279	0.0542982	1	0.741184	0.837965	1	0.999954	1.01279	1.01279	AHA up vs VEH	0.335721	1	0.81859	0.939651	-1.06422	AOL down vs VEH	0.115073	1	0.514474	1.10464	1.10464	HAL up vs VEH	0.0981496	1	0.999992	1.1103	1.1103	OLZ up vs VEH	0.201358	1	0.999678	1.08814	1.08814	PCP+OLZ up vs PCP	0.24204	1	0.999419	0.926856	-1.07892	PCP down vs VEH
34875_r_at	RB1CC1	RB1-inducible coiled-coil 1	NM_001083617 /// NM_014781	0.0544143	1	0.741184	0.700492	1	0.999954	1.01906	1.01906	AHA up vs VEH	0.790045	1	0.918514	0.986576	-1.01361	AOL down vs VEH	0.017626	1	0.514474	1.1285	1.1285	HAL up vs VEH	0.870013	1	0.999992	1.00806	1.00806	OLZ up vs VEH	0.278913	1	0.999678	0.945217	-1.05796	PCP+OLZ down vs PCP	0.851562	1	0.999419	1.00955	1.00955	PCP up vs VEH
1674_at	YES1	v-yes-1 Yamaguchi sarcoma viral oncogene homolog 1	NM_005433	0.0545042	1	0.741184	0.489775	1	0.999954	1.05209	1.05209	AHA up vs VEH	0.634227	1	0.86393	0.964512	-1.03679	AOL down vs VEH	0.0138352	1	0.514474	1.20675	1.20675	HAL up vs VEH	0.995952	1	0.999992	1.00037	1.00037	OLZ up vs VEH	0.928102	1	0.999678	0.993061	-1.00699	PCP+OLZ down vs PCP	0.767889	1	0.999419	0.977831	-1.02267	PCP down vs VEH
33102_at	ADD3	adducin 3 (gamma)	NM_001121 /// NM_016824 /// NM_019903	0.0545153	1	0.741184	0.235675	1	0.999954	0.917727	-1.08965	AHA down vs VEH	0.164099	1	0.81859	0.900692	-1.11026	AOL down vs VEH	0.578823	1	0.67954	1.0407	1.0407	HAL up vs VEH	0.0655191	1	0.999992	0.873604	-1.14468	OLZ down vs VEH	0.0946307	1	0.999678	1.13723	1.13723	PCP+OLZ up vs PCP	0.0145	1	0.999419	0.827732	-1.20812	PCP down vs VEH
37242_at	FTO	fat mass and obesity associated	NM_001080432	0.0545356	1	0.741184	0.903622	1	0.999954	0.992757	-1.0073	AHA down vs VEH	0.26182	1	0.81859	0.932141	-1.0728	AOL down vs VEH	0.0377211	1	0.514474	1.137	1.137	HAL up vs VEH	0.43845	1	0.999992	1.0478	1.0478	OLZ up vs VEH	0.444976	1	0.999678	1.04965	1.04965	PCP+OLZ up vs PCP	0.375593	1	0.999419	0.94613	-1.05694	PCP down vs VEH
1512_at	DYRK1A	dual-specificity tyrosine-(Y)-phosphorylation regulated kinase 1A	NM_001396 /// NM_101395 /// NM_130436 /// NM_130437 /// NM_130438	0.0545529	1	0.741184	0.564066	1	0.999954	0.9553	-1.04679	AHA down vs VEH	0.123063	1	0.81859	0.879657	-1.13681	AOL down vs VEH	0.342378	1	0.552081	1.07849	1.07849	HAL up vs VEH	0.787335	1	0.999992	1.02158	1.02158	OLZ up vs VEH	0.944301	1	0.999678	0.994198	-1.00584	PCP+OLZ down vs PCP	0.109357	1	0.999419	0.875072	-1.14276	PCP down vs VEH
1657_at	PTPRR	protein tyrosine phosphatase, receptor type, R	NM_002849 /// NM_130846	0.0546099	1	0.741184	0.198188	1	0.999954	1.08417	1.08417	AHA up vs VEH	0.837075	1	0.935861	1.01331	1.01331	AOL up vs VEH	0.011007	1	0.514474	1.17936	1.17936	HAL up vs VEH	0.0657371	1	0.999992	1.12404	1.12404	OLZ up vs VEH	0.481304	1	0.999678	0.954844	-1.04729	PCP+OLZ down vs PCP	0.624889	1	0.999419	1.03201	1.03201	PCP up vs VEH
39744_at	DDX3X	DEAD (Asp-Glu-Ala-Asp) box polypeptide 3, X-linked	NM_001356	0.0548307	1	0.741184	0.696426	1	0.999954	1.02559	1.02559	AHA up vs VEH	0.117263	1	0.81859	0.898916	-1.11245	AOL down vs VEH	0.114129	1	0.514474	1.10952	1.10952	HAL up vs VEH	0.87092	1	0.999992	0.989542	-1.01057	OLZ down vs VEH	0.579773	1	0.999678	1.03851	1.03851	PCP+OLZ up vs PCP	0.19102	1	0.999419	0.915198	-1.09266	PCP down vs VEH
35168_f_at	COL16A1	collagen, type XVI, alpha 1	NM_001856	0.0548981	1	0.741184	0.758034	1	0.999954	1.02	1.02	AHA up vs VEH	0.0114731	1	0.81859	0.839101	-1.19175	AOL down vs VEH	0.784012	1	0.833253	1.01777	1.01777	HAL up vs VEH	0.542138	1	0.999992	0.961501	-1.04004	OLZ down vs VEH	0.18269	1	0.999678	0.91283	-1.09549	PCP+OLZ down vs PCP	0.967998	1	0.999419	1.00267	1.00267	PCP up vs VEH
36608_at	MDH1	malate dehydrogenase 1, NAD (soluble)	NM_005917	0.0549575	1	0.741184	0.470524	1	0.999954	1.04761	1.04761	AHA up vs VEH	0.297585	1	0.81859	0.93266	-1.0722	AOL down vs VEH	0.0576705	1	0.514474	1.13303	1.13303	HAL up vs VEH	0.235951	1	0.999992	1.07986	1.07986	OLZ up vs VEH	0.921205	1	0.999678	1.00671	1.00671	PCP+OLZ up vs PCP	0.513963	1	0.999419	0.957394	-1.0445	PCP down vs VEH
37348_s_at	HMGN3	high mobility group nucleosomal binding domain 3	NM_004242 /// NM_138730	0.0552747	1	0.741184	0.529251	1	0.999954	1.0385	1.0385	AHA up vs VEH	0.565388	1	0.842133	0.964933	-1.03634	AOL down vs VEH	0.019237	1	0.514474	1.15657	1.15657	HAL up vs VEH	0.427635	1	0.999992	1.04886	1.04886	OLZ up vs VEH	0.494049	1	0.999678	1.0442	1.0442	PCP+OLZ up vs PCP	0.408448	1	0.999419	0.949794	-1.05286	PCP down vs VEH
34647_at	DDX5	DEAD (Asp-Glu-Ala-Asp) box polypeptide 5	NM_004396	0.0555131	1	0.741184	0.44143	1	0.999954	0.952898	-1.04943	AHA down vs VEH	0.0500463	1	0.81859	0.87821	-1.13868	AOL down vs VEH	0.428564	1	0.585876	1.05088	1.05088	HAL up vs VEH	0.295093	1	0.999992	0.936276	-1.06806	OLZ down vs VEH	0.423241	1	0.999678	1.05428	1.05428	PCP+OLZ up vs PCP	0.0337026	1	0.999419	0.86802	-1.15205	PCP down vs VEH
32434_at	MARCKS	myristoylated alanine-rich protein kinase C substrate	NM_002356	0.0555205	1	0.741184	0.41478	1	0.999954	1.05644	1.05644	AHA up vs VEH	0.908935	1	0.96421	0.992099	-1.00796	AOL down vs VEH	0.0114256	1	0.514474	1.19366	1.19366	HAL up vs VEH	0.172354	1	0.999992	1.09704	1.09704	OLZ up vs VEH	0.828266	1	0.999678	1.01543	1.01543	PCP+OLZ up vs PCP	0.735042	1	0.999419	0.976761	-1.02379	PCP down vs VEH
38422_s_at	FHL2	four and a half LIM domains 2	NM_001039492 /// NM_001450 /// NM_201555 /// NM_201557	0.0560163	1	0.741184	0.962375	1	0.999954	0.997183	-1.00283	AHA down vs VEH	0.0320996	1	0.81859	0.872188	-1.14654	AOL down vs VEH	0.470795	1	0.60927	1.04423	1.04423	HAL up vs VEH	0.511694	1	0.999992	0.96141	-1.04014	OLZ down vs VEH	0.222034	1	0.999678	0.925286	-1.08075	PCP+OLZ down vs PCP	0.525848	1	0.999419	0.96137	-1.04018	PCP down vs VEH
32307_s_at	COL1A2	collagen, type I, alpha 2	NM_000089	0.0560399	1	0.741184	0.315553	1	0.999954	1.06449	1.06449	AHA up vs VEH	0.497977	1	0.824989	0.957431	-1.04446	AOL down vs VEH	0.252347	1	0.518586	1.07404	1.07404	HAL up vs VEH	0.749735	1	0.999992	1.01994	1.01994	OLZ up vs VEH	0.786413	1	0.999678	0.982499	-1.01781	PCP+OLZ down vs PCP	0.214087	1	0.999419	0.922726	-1.08375	PCP down vs VEH
38852_at	AGAP2	ArfGAP with GTPase domain, ankyrin repeat and PH domain 2	NM_001122772 /// NM_014770	0.056074	1	0.741184	0.249758	1	0.999954	1.06519	1.06519	AHA up vs VEH	0.145044	1	0.81859	0.920194	-1.08673	AOL down vs VEH	0.158264	1	0.514474	1.08087	1.08087	HAL up vs VEH	0.183895	1	0.999992	1.07587	1.07587	OLZ up vs VEH	0.170612	1	0.999678	1.08269	1.08269	PCP+OLZ up vs PCP	0.396289	1	0.999419	0.95312	-1.04919	PCP down vs VEH
35943_s_at	GABPB1	GA binding protein transcription factor, beta subunit 1	NM_002041 /// NM_005254 /// NM_016654 /// NM_016655 /// NM_181427	0.0563884	1	0.741184	0.946922	1	0.999954	1.0033	1.0033	AHA up vs VEH	0.488632	1	0.824989	0.965011	-1.03626	AOL down vs VEH	0.0241835	1	0.514474	1.12253	1.12253	HAL up vs VEH	0.794145	1	0.999992	0.987147	-1.01302	OLZ down vs VEH	0.158574	1	0.999678	0.92817	-1.07739	PCP+OLZ down vs PCP	0.400956	1	0.999419	1.04426	1.04426	PCP up vs VEH
31810_g_at	CNTN1	contactin 1	NM_001843 /// NM_175038	0.0566102	1	0.741184	0.535004	1	0.999954	0.967086	-1.03403	AHA down vs VEH	0.361003	1	0.81859	0.950151	-1.05246	AOL down vs VEH	0.241757	1	0.516024	1.06563	1.06563	HAL up vs VEH	0.20776	1	0.999992	0.933787	-1.07091	OLZ down vs VEH	0.193914	1	0.999678	1.07727	1.07727	PCP+OLZ up vs PCP	0.0302303	1	0.999419	0.882809	-1.13275	PCP down vs VEH
41474_at	KIF2A	kinesin heavy chain member 2A	NM_001098511 /// NM_004520	0.0566833	1	0.741184	0.913359	1	0.999954	1.00697	1.00697	AHA up vs VEH	0.131795	1	0.81859	0.903843	-1.10639	AOL down vs VEH	0.115917	1	0.514474	1.10747	1.10747	HAL up vs VEH	0.901556	1	0.999992	1.00793	1.00793	OLZ up vs VEH	0.268761	1	0.999678	1.07785	1.07785	PCP+OLZ up vs PCP	0.117523	1	0.999419	0.900101	-1.11099	PCP down vs VEH
718_at	HTRA1	HtrA serine peptidase 1	NM_002775	0.0568282	1	0.741184	0.181657	1	0.999954	1.08115	1.08115	AHA up vs VEH	0.76758	1	0.912801	0.982495	-1.01782	AOL down vs VEH	0.0695218	1	0.514474	1.11305	1.11305	HAL up vs VEH	0.914155	1	0.999992	0.993796	-1.00624	OLZ down vs VEH	0.889524	1	0.999678	1.00848	1.00848	PCP+OLZ up vs PCP	0.338884	1	0.999419	0.944096	-1.05921	PCP down vs VEH
34987_s_at	HNRNPA1	heterogeneous nuclear ribonucleoprotein A1	NM_002136 /// NM_031157	0.0569367	1	0.741184	0.891064	1	0.999954	0.990878	-1.00921	AHA down vs VEH	0.0470321	1	0.81859	0.868365	-1.15159	AOL down vs VEH	0.243517	1	0.516948	1.08191	1.08191	HAL up vs VEH	0.736014	1	0.999992	1.02283	1.02283	OLZ up vs VEH	0.837589	1	0.999678	0.985662	-1.01455	PCP+OLZ down vs PCP	0.322105	1	0.999419	0.933273	-1.0715	PCP down vs VEH
480_at	PKMYT1	protein kinase, membrane associated tyrosine/threonine 1	NM_004203 /// NM_182687	0.0569382	1	0.741184	0.765085	1	0.999954	1.01628	1.01628	AHA up vs VEH	0.221453	1	0.81859	0.933305	-1.07146	AOL down vs VEH	0.0408904	1	0.514474	1.12031	1.12031	HAL up vs VEH	0.676069	1	0.999992	0.977654	-1.02286	OLZ down vs VEH	0.925872	1	0.999678	0.994722	-1.00531	PCP+OLZ down vs PCP	0.603352	1	0.999419	0.971294	-1.02955	PCP down vs VEH
31933_r_at	BTF3	basic transcription factor 3	NM_001037637 /// NM_001207	0.0570084	1	0.741184	0.651696	1	0.999954	1.02188	1.02188	AHA up vs VEH	0.285704	1	0.81859	0.948107	-1.05473	AOL down vs VEH	0.0516343	1	0.514474	1.1003	1.1003	HAL up vs VEH	0.730534	1	0.999992	0.983632	-1.01664	OLZ down vs VEH	0.0683746	1	0.999678	1.0985	1.0985	PCP+OLZ up vs PCP	0.290671	1	0.999419	0.948576	-1.05421	PCP down vs VEH
118_at	ITPKA	inositol 1,4,5-trisphosphate 3-kinase A	NM_002220	0.0575842	1	0.741184	0.745019	1	0.999954	1.02103	1.02103	AHA up vs VEH	0.69695	1	0.885685	0.97454	-1.02612	AOL down vs VEH	0.181118	1	0.514474	1.09039	1.09039	HAL up vs VEH	0.547055	1	0.999992	1.03935	1.03935	OLZ up vs VEH	0.0662962	1	0.999678	1.1348	1.1348	PCP+OLZ up vs PCP	0.0328047	1	0.999419	0.864368	-1.15691	PCP down vs VEH
32276_at	RPL32	ribosomal protein L32	NM_000994 /// NM_001007073 /// NM_001007074	0.0576398	1	0.741184	0.859972	1	0.999954	1.00984	1.00984	AHA up vs VEH	0.848042	1	0.941755	1.01106	1.01106	AOL up vs VEH	0.0068467	1	0.514474	1.17075	1.17075	HAL up vs VEH	0.955156	1	0.999992	1.00312	1.00312	OLZ up vs VEH	0.286397	1	0.999678	1.06476	1.06476	PCP+OLZ up vs PCP	0.801363	1	0.999419	0.98564	-1.01457	PCP down vs VEH
501_g_at	CYP2J2	cytochrome P450, family 2, subfamily J, polypeptide 2	NM_000775	0.0577483	1	0.741184	0.283766	1	0.999954	1.07282	1.07282	AHA up vs VEH	0.470252	1	0.821908	0.95239	-1.04999	AOL down vs VEH	0.0279068	1	0.514474	1.15927	1.15927	HAL up vs VEH	0.208646	1	0.999992	1.0862	1.0862	OLZ up vs VEH	0.810895	1	0.999678	0.983735	-1.01653	PCP+OLZ down vs PCP	0.875221	1	0.999419	0.98947	-1.01064	PCP down vs VEH
38417_at	AMPD2	adenosine monophosphate deaminase 2 (isoform L)	NM_004037 /// NM_139156 /// NM_203404	0.0578818	1	0.741184	0.857044	1	0.999954	1.01131	1.01131	AHA up vs VEH	0.127857	1	0.81859	0.904995	-1.10498	AOL down vs VEH	0.100101	1	0.514474	1.11013	1.11013	HAL up vs VEH	0.964623	1	0.999992	1.00277	1.00277	OLZ up vs VEH	0.511289	1	0.999678	1.04422	1.04422	PCP+OLZ up vs PCP	0.186534	1	0.999419	0.917259	-1.0902	PCP down vs VEH
33850_at	MAP4	microtubule-associated protein 4	NM_001134364 /// NM_001134365 /// NM_002375 /// NM_030884 /// NM_030885	0.0579211	1	0.741184	0.910048	1	0.999954	1.00564	1.00564	AHA up vs VEH	0.035628	1	0.81859	0.89452	-1.11792	AOL down vs VEH	0.475143	1	0.611376	1.03631	1.03631	HAL up vs VEH	0.745967	1	0.999992	0.983992	-1.01627	OLZ down vs VEH	0.066024	1	0.999678	1.10357	1.10357	PCP+OLZ up vs PCP	0.0487679	1	0.999419	0.900968	-1.10992	PCP down vs VEH
40489_at	ATN1	atrophin 1	NM_001007026 /// NM_001940	0.0579432	1	0.741184	0.533173	1	0.999954	0.966579	-1.03458	AHA down vs VEH	0.00768519	1	0.81859	0.854346	-1.17049	AOL down vs VEH	0.836055	1	0.872317	0.988801	-1.01133	HAL down vs VEH	0.433728	1	0.999992	0.958136	-1.04369	OLZ down vs VEH	0.0845199	1	0.999678	1.10606	1.10606	PCP+OLZ up vs PCP	0.240678	1	0.999419	0.93545	-1.069	PCP down vs VEH
36153_at	DHX9	DEAH (Asp-Glu-Ala-His) box polypeptide 9	NM_001357	0.0579665	1	0.741184	0.667637	1	0.999954	1.0241	1.0241	AHA up vs VEH	0.205736	1	0.81859	0.929336	-1.07604	AOL down vs VEH	0.0757494	1	0.514474	1.10568	1.10568	HAL up vs VEH	0.533616	1	0.999992	1.03517	1.03517	OLZ up vs VEH	0.347469	1	0.999678	1.05665	1.05665	PCP+OLZ up vs PCP	0.203517	1	0.999419	0.928917	-1.07652	PCP down vs VEH
37996_s_at	DMPK	dystrophia myotonica-protein kinase	NM_001081560 /// NM_001081562 /// NM_001081563 /// NM_004409	0.058482	1	0.741184	0.996537	1	0.999954	1.0003	1.0003	AHA up vs VEH	0.0839059	1	0.81859	0.881413	-1.13454	AOL down vs VEH	0.160332	1	0.514474	1.10343	1.10343	HAL up vs VEH	0.822775	1	0.999992	1.01562	1.01562	OLZ up vs VEH	0.400222	1	0.999678	1.0635	1.0635	PCP+OLZ up vs PCP	0.137662	1	0.999419	0.897657	-1.11401	PCP down vs VEH
38365_at	PEX1	peroxisomal biogenesis factor 1	NM_000466	0.0585271	1	0.741184	0.997632	1	0.999954	0.999759	-1.00024	AHA down vs VEH	0.394753	1	0.819966	0.930788	-1.07436	AOL down vs VEH	0.0831516	1	0.514474	1.1541	1.1541	HAL up vs VEH	0.747087	1	0.999992	1.02651	1.02651	OLZ up vs VEH	0.950896	1	0.999678	0.994757	-1.00527	PCP+OLZ down vs PCP	0.243727	1	0.999419	0.905948	-1.10382	PCP down vs VEH
34188_at	ATP2B1	ATPase, Ca++ transporting, plasma membrane 1	NM_001001323 /// NM_001682	0.058771	1	0.741184	0.843853	1	0.999954	1.01252	1.01252	AHA up vs VEH	0.172219	1	0.81859	0.913628	-1.09454	AOL down vs VEH	0.108269	1	0.514474	1.10873	1.10873	HAL up vs VEH	0.926224	1	0.999992	1.00587	1.00587	OLZ up vs VEH	0.175774	1	0.999678	1.09543	1.09543	PCP+OLZ up vs PCP	0.100817	1	0.999419	0.896451	-1.11551	PCP down vs VEH
37645_at	CD69	CD69 molecule	NM_001781 /// NR_026671 /// NR_026672	0.0588165	1	0.741184	0.762965	1	0.999954	1.02176	1.02176	AHA up vs VEH	0.470948	1	0.821908	0.948013	-1.05484	AOL down vs VEH	0.0180225	1	0.514474	1.19146	1.19146	HAL up vs VEH	0.421613	1	0.999992	1.05926	1.05926	OLZ up vs VEH	0.8743	1	0.999678	1.01195	1.01195	PCP+OLZ up vs PCP	0.658219	1	0.999419	0.967805	-1.03327	PCP down vs VEH
41725_at	CSNK1G2	casein kinase 1, gamma 2	NM_001319	0.0588572	1	0.741184	0.224375	1	0.999954	1.06219	1.06219	AHA up vs VEH	0.0729619	1	0.81859	0.911015	-1.09768	AOL down vs VEH	0.166796	1	0.514474	1.07128	1.07128	HAL up vs VEH	0.855412	1	0.999992	1.009	1.009	OLZ up vs VEH	0.270973	1	0.999678	1.05913	1.05913	PCP+OLZ up vs PCP	0.479211	1	0.999419	0.964492	-1.03682	PCP down vs VEH
31628_at	SLC15A1	solute carrier family 15 (oligopeptide transporter), member 1	NM_005073	0.0589658	1	0.741184	0.0580908	1	0.999954	1.12073	1.12073	AHA up vs VEH	0.94454	1	0.978572	0.995783	-1.00424	AOL down vs VEH	0.101416	1	0.514474	1.10288	1.10288	HAL up vs VEH	0.830305	1	0.999992	0.987491	-1.01267	OLZ down vs VEH	0.0434381	1	0.999678	0.879582	-1.1369	PCP+OLZ down vs PCP	0.0950392	1	0.999419	1.10898	1.10898	PCP up vs VEH
41000_at	FOXN3	forkhead box N3	NM_001085471 /// NM_005197	0.0593461	1	0.741184	0.7596	1	0.999954	0.981765	-1.01857	AHA down vs VEH	0.0667468	1	0.81859	0.889944	-1.12367	AOL down vs VEH	0.366489	1	0.557036	1.05609	1.05609	HAL up vs VEH	0.976506	1	0.999992	1.00177	1.00177	OLZ up vs VEH	0.530187	1	0.999678	0.960958	-1.04063	PCP+OLZ down vs PCP	0.244159	1	0.999419	0.929453	-1.0759	PCP down vs VEH
35903_at	OMG	oligodendrocyte myelin glycoprotein	NM_002544	0.0593883	1	0.741184	0.752079	1	0.999954	0.982762	-1.01754	AHA down vs VEH	0.552483	1	0.836548	0.966682	-1.03447	AOL down vs VEH	0.0133224	1	0.514474	1.15244	1.15244	HAL up vs VEH	0.572548	1	0.999992	1.0316	1.0316	OLZ up vs VEH	0.465367	1	0.999678	1.04334	1.04334	PCP+OLZ up vs PCP	0.809384	1	0.999419	0.986346	-1.01384	PCP down vs VEH
33372_at	RAB31	RAB31, member RAS oncogene family	NM_006868	0.0596551	1	0.741184	0.66731	1	0.999954	1.02602	1.02602	AHA up vs VEH	0.244458	1	0.81859	0.930037	-1.07523	AOL down vs VEH	0.0875487	1	0.514474	1.10959	1.10959	HAL up vs VEH	0.722115	1	0.999992	0.978978	-1.02147	OLZ down vs VEH	0.933605	1	0.999678	0.994778	-1.00525	PCP+OLZ down vs PCP	0.309344	1	0.999419	0.938675	-1.06533	PCP down vs VEH
39330_s_at	ACTN1	actinin, alpha 1	NM_001102 /// NM_001130004 /// NM_001130005	0.0596644	1	0.741184	0.817023	1	0.999954	1.01282	1.01282	AHA up vs VEH	0.0244197	1	0.81859	0.875808	-1.1418	AOL down vs VEH	0.690754	1	0.762429	1.02217	1.02217	HAL up vs VEH	0.858249	1	0.999992	0.990214	-1.00988	OLZ down vs VEH	0.152951	1	0.999678	1.0876	1.0876	PCP+OLZ up vs PCP	0.0477425	1	0.999419	0.890583	-1.12286	PCP down vs VEH
40502_r_at	MYBPC1	myosin binding protein C, slow type	NM_002465 /// NM_206819 /// NM_206820 /// NM_206821	0.0597414	1	0.741184	0.0981464	1	0.999954	1.09255	1.09255	AHA up vs VEH	0.917914	1	0.968924	1.00562	1.00562	AOL up vs VEH	0.00434654	1	0.514474	1.17156	1.17156	HAL up vs VEH	0.371327	1	0.999992	1.04836	1.04836	OLZ up vs VEH	0.35205	1	0.999678	0.949536	-1.05315	PCP+OLZ down vs PCP	0.181696	1	0.999419	1.07633	1.07633	PCP up vs VEH
1134_at	TNK2	tyrosine kinase, non-receptor, 2	NM_001010938 /// NM_005781	0.0597524	1	0.741184	0.339268	1	0.999954	1.05151	1.05151	AHA up vs VEH	0.166067	1	0.81859	0.926984	-1.07877	AOL down vs VEH	0.0983555	1	0.514474	1.09192	1.09192	HAL up vs VEH	0.522999	1	0.999992	1.03402	1.03402	OLZ up vs VEH	0.547799	1	0.999678	1.03369	1.03369	PCP+OLZ up vs PCP	0.323252	1	0.999419	0.947624	-1.05527	PCP down vs VEH
37318_at	ETF1	eukaryotic translation termination factor 1	NM_004730	0.0599437	1	0.741184	0.223653	1	0.999954	1.06983	1.06983	AHA up vs VEH	0.484936	1	0.824989	0.960968	-1.04062	AOL down vs VEH	0.032925	1	0.514474	1.12839	1.12839	HAL up vs VEH	0.373519	1	0.999992	1.05036	1.05036	OLZ up vs VEH	0.420519	1	0.999678	1.04789	1.04789	PCP+OLZ up vs PCP	0.404516	1	0.999419	0.953476	-1.04879	PCP down vs VEH
681_at	MMP8	matrix metallopeptidase 8 (neutrophil collagenase)	NM_002424	0.0602647	1	0.741184	0.435733	1	0.999954	1.04914	1.04914	AHA up vs VEH	0.679997	1	0.88013	1.02653	1.02653	AOL up vs VEH	0.0108247	1	0.514474	1.17726	1.17726	HAL up vs VEH	0.9609	1	0.999992	0.997	-1.00301	OLZ down vs VEH	0.39623	1	0.999678	0.946474	-1.05655	PCP+OLZ down vs PCP	0.750064	1	0.999419	1.02044	1.02044	PCP up vs VEH
32279_at	GAD2	glutamate decarboxylase 2 (pancreatic islets and brain, 65kDa)	NM_000818 /// NM_001134366	0.0603279	1	0.741184	0.532054	1	0.999954	1.03787	1.03787	AHA up vs VEH	0.420682	1	0.819966	0.951569	-1.0509	AOL down vs VEH	0.14906	1	0.514474	1.09069	1.09069	HAL up vs VEH	0.297342	1	0.999992	1.06426	1.06426	OLZ up vs VEH	0.50109	1	0.999678	1.04305	1.04305	PCP+OLZ up vs PCP	0.149274	1	0.999419	0.914057	-1.09402	PCP down vs VEH
37677_at	PGK1	phosphoglycerate kinase 1	NM_000291	0.0603297	1	0.741184	0.693028	1	0.999954	0.975642	-1.02497	AHA down vs VEH	0.558855	1	0.838563	0.962881	-1.03855	AOL down vs VEH	0.0645982	1	0.514474	1.12524	1.12524	HAL up vs VEH	0.112544	1	0.999992	1.10595	1.10595	OLZ up vs VEH	0.36198	1	0.999678	1.06208	1.06208	PCP+OLZ up vs PCP	0.398301	1	0.999419	0.946623	-1.05639	PCP down vs VEH
1213_at	SRPK2	SFRS protein kinase 2	NM_182691 /// NM_182692	0.0603695	1	0.741184	0.950767	1	0.999954	0.995674	-1.00434	AHA down vs VEH	0.0564485	1	0.81859	0.867622	-1.15258	AOL down vs VEH	0.260633	1	0.52063	1.08292	1.08292	HAL up vs VEH	0.449215	1	0.999992	1.05479	1.05479	OLZ up vs VEH	0.850198	1	0.999678	0.986131	-1.01406	PCP+OLZ down vs PCP	0.397439	1	0.999419	0.940036	-1.06379	PCP down vs VEH
1452_at	LMO4	LIM domain only 4	NM_006769	0.0605676	1	0.741184	0.791537	1	0.999954	1.01518	1.01518	AHA up vs VEH	0.0723185	1	0.81859	0.897415	-1.11431	AOL down vs VEH	0.0933361	1	0.514474	1.10232	1.10232	HAL up vs VEH	0.566613	1	0.999992	1.03326	1.03326	OLZ up vs VEH	0.486781	1	0.999678	1.04273	1.04273	PCP+OLZ up vs PCP	0.454184	1	0.999419	0.95664	-1.04533	PCP down vs VEH
36790_at	TPM1	tropomyosin 1 (alpha)	NM_000366 /// NM_001018004 /// NM_001018005 /// NM_001018006 /// NM_001018007 //	0.0605871	1	0.741184	0.246805	1	0.999954	1.07131	1.07131	AHA up vs VEH	0.194808	1	0.81859	0.92315	-1.08325	AOL down vs VEH	0.132612	1	0.514474	1.09418	1.09418	HAL up vs VEH	0.68882	1	0.999992	1.02391	1.02391	OLZ up vs VEH	0.31297	1	0.999678	1.06508	1.06508	PCP+OLZ up vs PCP	0.205234	1	0.999419	0.924798	-1.08132	PCP down vs VEH
36111_s_at	SFRS2	splicing factor, arginine/serine-rich 2	NM_003016	0.0606818	1	0.741184	0.957484	1	0.999954	1.00313	1.00313	AHA up vs VEH	0.108971	1	0.81859	0.905879	-1.1039	AOL down vs VEH	0.166259	1	0.514474	1.08563	1.08563	HAL up vs VEH	0.959795	1	0.999992	0.99705	-1.00296	OLZ down vs VEH	0.331052	1	0.999678	1.0622	1.0622	PCP+OLZ up vs PCP	0.0955221	1	0.999419	0.902068	-1.10856	PCP down vs VEH
168_at	ADK	adenosine kinase	NM_001123 /// NM_006721	0.0606987	1	0.741184	0.394052	1	0.999954	1.04488	1.04488	AHA up vs VEH	0.943765	1	0.978071	0.996266	-1.00375	AOL down vs VEH	0.0122002	1	0.514474	1.14345	1.14345	HAL up vs VEH	0.898023	1	0.999992	1.00659	1.00659	OLZ up vs VEH	0.347371	1	0.999678	0.95026	-1.05234	PCP+OLZ down vs PCP	0.707974	1	0.999419	1.02011	1.02011	PCP up vs VEH
2094_s_at	FOS	FBJ murine osteosarcoma viral oncogene homolog	NM_005252	0.0608029	1	0.741184	0.856458	1	0.999954	1.01003	1.01003	AHA up vs VEH	0.011822	1	0.81859	0.860794	-1.16172	AOL down vs VEH	0.711183	1	0.776594	1.02065	1.02065	HAL up vs VEH	0.377391	1	0.999992	0.952246	-1.05015	OLZ down vs VEH	0.537662	1	0.999678	1.03653	1.03653	PCP+OLZ up vs PCP	0.118958	1	0.999419	0.91346	-1.09474	PCP down vs VEH
41158_at	PLP1	proteolipid protein 1	NM_000533 /// NM_001128834 /// NM_199478	0.0608528	1	0.741184	0.0662265	1	0.999954	0.883408	-1.13198	AHA down vs VEH	0.0742315	1	0.81859	0.882948	-1.13257	AOL down vs VEH	0.384069	1	0.565974	0.943913	-1.05942	HAL down vs VEH	0.593258	1	0.999992	0.965308	-1.03594	OLZ down vs VEH	0.00931522	1	0.999678	1.20812	1.20812	PCP+OLZ up vs PCP	0.00759945	1	0.999419	0.825789	-1.21096	PCP down vs VEH
36881_at	ETFB	electron-transfer-flavoprotein, beta polypeptide	NM_001014763 /// NM_001985	0.0608903	1	0.741184	0.1128	1	0.999954	1.1041	1.1041	AHA up vs VEH	0.212459	1	0.81859	0.923079	-1.08333	AOL down vs VEH	0.0895029	1	0.514474	1.11216	1.11216	HAL up vs VEH	0.613519	1	0.999992	1.03156	1.03156	OLZ up vs VEH	0.264194	1	0.999678	0.929796	-1.0755	PCP+OLZ down vs PCP	0.465757	1	0.999419	1.04766	1.04766	PCP up vs VEH
1309_at	PSMB3	proteasome (prosome, macropain) subunit, beta type, 3	NM_002795	0.0612515	1	0.741184	0.816588	1	0.999954	1.01504	1.01504	AHA up vs VEH	0.0742196	1	0.81859	0.885679	-1.12908	AOL down vs VEH	0.394197	1	0.569739	1.05663	1.05663	HAL up vs VEH	0.806734	1	0.999992	0.984377	-1.01587	OLZ down vs VEH	0.374721	1	0.999678	1.06231	1.06231	PCP+OLZ up vs PCP	0.0528112	1	0.999419	0.87605	-1.14149	PCP down vs VEH
40496_at	C1S	complement component 1, s subcomponent	NM_001734 /// NM_201442	0.0614292	1	0.741184	0.0855303	1	0.999954	1.12196	1.12196	AHA up vs VEH	0.662968	1	0.872695	0.970813	-1.03006	AOL down vs VEH	0.0380243	1	0.514474	1.1504	1.1504	HAL up vs VEH	0.465904	1	0.999992	1.04918	1.04918	OLZ up vs VEH	0.0972525	1	0.999678	0.889866	-1.12376	PCP+OLZ down vs PCP	0.023743	1	0.999419	1.17239	1.17239	PCP up vs VEH
38681_at	EIF3E	eukaryotic translation initiation factor 3, subunit E	NM_001568	0.0614956	1	0.741184	0.644687	1	0.999954	0.970716	-1.03017	AHA down vs VEH	0.19538	1	0.81859	0.916506	-1.0911	AOL down vs VEH	0.258655	1	0.520268	1.07607	1.07607	HAL up vs VEH	0.58657	1	0.999992	1.03569	1.03569	OLZ up vs VEH	0.84972	1	0.999678	0.98724	-1.01292	PCP+OLZ down vs PCP	0.176595	1	0.999419	0.91285	-1.09547	PCP down vs VEH
36542_at	SLC9A6	solute carrier family 9 (sodium/hydrogen exchanger), member 6	NM_001042537 /// NM_006359	0.0618052	1	0.741184	0.635454	1	0.999954	1.02891	1.02891	AHA up vs VEH	0.368489	1	0.81859	0.945401	-1.05775	AOL down vs VEH	0.054417	1	0.514474	1.12564	1.12564	HAL up vs VEH	0.459436	1	0.999992	1.04557	1.04557	OLZ up vs VEH	0.10514	1	0.999678	0.901033	-1.10984	PCP+OLZ down vs PCP	0.549409	1	0.999419	1.03801	1.03801	PCP up vs VEH
33341_at	GNB1	guanine nucleotide binding protein (G protein), beta polypeptide 1	NM_002074	0.0619775	1	0.741184	0.675151	1	0.999954	1.02441	1.02441	AHA up vs VEH	0.492827	1	0.824989	0.959911	-1.04176	AOL down vs VEH	0.0278791	1	0.514474	1.13949	1.13949	HAL up vs VEH	0.156473	1	0.999992	1.08606	1.08606	OLZ up vs VEH	0.19059	1	0.999678	1.08342	1.08342	PCP+OLZ up vs PCP	0.455047	1	0.999419	0.956339	-1.04565	PCP down vs VEH
36596_r_at	GATM	glycine amidinotransferase (L-arginine:glycine amidinotransferase)	NM_001482	0.0620406	1	0.741184	0.547371	1	0.999954	1.03482	1.03482	AHA up vs VEH	0.563943	1	0.841001	0.966615	-1.03454	AOL down vs VEH	0.022573	1	0.514474	1.14344	1.14344	HAL up vs VEH	0.741606	1	0.999992	0.981447	-1.0189	OLZ down vs VEH	0.471936	1	0.999678	1.04407	1.04407	PCP+OLZ up vs PCP	0.436152	1	0.999419	0.95508	-1.04703	PCP down vs VEH
39932_at	DUSP7	dual specificity phosphatase 7	NM_001947	0.0621254	1	0.741184	0.171197	1	0.999954	0.901742	-1.10897	AHA down vs VEH	0.0262187	1	0.81859	0.837385	-1.19419	AOL down vs VEH	0.862394	1	0.89397	1.01302	1.01302	HAL up vs VEH	0.820747	1	0.999992	1.01706	1.01706	OLZ up vs VEH	0.949879	1	0.999678	1.00495	1.00495	PCP+OLZ up vs PCP	0.0983315	1	0.999419	0.877958	-1.13901	PCP down vs VEH
41765_at	RPL35	ribosomal protein L35	NM_007209	0.0621623	1	0.741184	0.109233	1	0.999954	1.09002	1.09002	AHA up vs VEH	0.7254	1	0.898934	1.01943	1.01943	AOL up vs VEH	0.0158915	1	0.514474	1.14187	1.14187	HAL up vs VEH	0.0737351	1	0.999992	1.10148	1.10148	OLZ up vs VEH	0.412659	1	0.999678	1.0469	1.0469	PCP+OLZ up vs PCP	0.653829	1	0.999419	0.975695	-1.02491	PCP down vs VEH
38664_at	CFDP1	craniofacial development protein 1	NM_006324	0.0621905	1	0.741184	0.109665	1	0.999954	1.09843	1.09843	AHA up vs VEH	0.108151	1	0.81859	0.907045	-1.10248	AOL down vs VEH	0.210601	1	0.514474	1.07572	1.07572	HAL up vs VEH	0.434988	1	0.999992	1.04626	1.04626	OLZ up vs VEH	0.98284	1	0.999678	0.998694	-1.00131	PCP+OLZ down vs PCP	0.861443	1	0.999419	0.989622	-1.01049	PCP down vs VEH
36748_at	SYN2	synapsin II	NM_003178 /// NM_133625	0.0622495	1	0.741184	0.663091	1	0.999954	1.02679	1.02679	AHA up vs VEH	0.432339	1	0.819966	1.05069	1.05069	AOL up vs VEH	0.171084	1	0.514474	1.08764	1.08764	HAL up vs VEH	0.495534	1	0.999992	1.04231	1.04231	OLZ up vs VEH	0.00449096	1	0.999678	1.21109	1.21109	PCP+OLZ up vs PCP	0.0625593	1	0.999419	0.887216	-1.12712	PCP down vs VEH
1295_at	RELA	v-rel reticuloendotheliosis viral oncogene homolog A (avian)	NM_001145138 /// NM_021975	0.0622776	1	0.741184	0.450776	1	0.999954	1.04257	1.04257	AHA up vs VEH	0.301286	1	0.81859	0.942409	-1.06111	AOL down vs VEH	0.056189	1	0.514474	1.11379	1.11379	HAL up vs VEH	0.901095	1	0.999992	1.00687	1.00687	OLZ up vs VEH	0.898239	1	0.999678	1.00744	1.00744	PCP+OLZ up vs PCP	0.387056	1	0.999419	0.951625	-1.05083	PCP down vs VEH
39830_at	RPL27	ribosomal protein L27	NM_000988	0.0626951	1	0.741184	0.280551	1	0.999954	1.05726	1.05726	AHA up vs VEH	0.961961	1	0.985801	1.00253	1.00253	AOL up vs VEH	0.00817759	1	0.514474	1.15254	1.15254	HAL up vs VEH	0.307548	1	0.999992	1.05402	1.05402	OLZ up vs VEH	0.64219	1	0.999678	1.0254	1.0254	PCP+OLZ up vs PCP	0.724029	1	0.999419	0.981434	-1.01892	PCP down vs VEH
40112_at	IDH3B	isocitrate dehydrogenase 3 (NAD+) beta	NM_006899 /// NM_174855 /// NM_174856	0.0630341	1	0.741184	0.652699	1	0.999954	1.02803	1.02803	AHA up vs VEH	0.0568661	1	0.81859	0.883536	-1.13182	AOL down vs VEH	0.543994	1	0.657743	1.03802	1.03802	HAL up vs VEH	0.285138	1	0.999992	1.06829	1.06829	OLZ up vs VEH	0.806253	1	0.999678	1.01597	1.01597	PCP+OLZ up vs PCP	0.277451	1	0.999419	0.932819	-1.07202	PCP down vs VEH
944_s_at	PPFIA1	protein tyrosine phosphatase, receptor type, f polypeptide (PTPRF), interacting	NM_003626 /// NM_177423	0.0632108	1	0.741184	0.668889	1	0.999954	0.971717	-1.02911	AHA down vs VEH	0.125971	1	0.81859	0.897854	-1.11377	AOL down vs VEH	0.24381	1	0.517068	1.08199	1.08199	HAL up vs VEH	0.961424	1	0.999992	1.00325	1.00325	OLZ up vs VEH	0.0828533	1	0.999678	1.13297	1.13297	PCP+OLZ up vs PCP	0.0412968	1	0.999419	0.864481	-1.15676	PCP down vs VEH
40209_at	ICAM5	intercellular adhesion molecule 5, telencephalin	NM_003259	0.0636303	1	0.741184	0.920132	1	0.999954	0.992584	-1.00747	AHA down vs VEH	0.00976819	1	0.81859	0.812533	-1.23072	AOL down vs VEH	0.947704	1	0.961683	1.00488	1.00488	HAL up vs VEH	0.827518	1	0.999992	0.98395	-1.01631	OLZ down vs VEH	0.150562	1	0.999678	1.12066	1.12066	PCP+OLZ up vs PCP	0.0667215	1	0.999419	0.865722	-1.1551	PCP down vs VEH
1077_at	RAG1	recombination activating gene 1	NM_000448	0.0637759	1	0.741184	0.410479	1	0.999954	1.04057	1.04057	AHA up vs VEH	0.107983	1	0.81859	0.921835	-1.08479	AOL down vs VEH	0.126184	1	0.514474	1.07759	1.07759	HAL up vs VEH	0.531792	1	0.999992	0.970293	-1.03062	OLZ down vs VEH	0.44895	1	0.999678	0.962237	-1.03925	PCP+OLZ down vs PCP	0.984423	1	0.999419	1.00097	1.00097	PCP up vs VEH
267_at	MTOR	mechanistic target of rapamycin (serine/threonine kinase)	NM_004958	0.0639875	1	0.741184	0.665125	1	0.999954	0.969713	-1.03123	AHA down vs VEH	0.187503	1	0.81859	0.906744	-1.10285	AOL down vs VEH	0.199146	1	0.514474	1.0965	1.0965	HAL up vs VEH	0.972071	1	0.999992	0.997518	-1.00249	OLZ down vs VEH	0.137193	1	0.999678	1.1193	1.1193	PCP+OLZ up vs PCP	0.041946	1	0.999419	0.857516	-1.16616	PCP down vs VEH
34857_at	ATP13A3	ATPase type 13A3	NM_024524	0.0640594	1	0.741184	0.60241	1	0.999954	1.03436	1.03436	AHA up vs VEH	0.249077	1	0.81859	0.925074	-1.08099	AOL down vs VEH	0.0862307	1	0.514474	1.11994	1.11994	HAL up vs VEH	0.595493	1	0.999992	1.03503	1.03503	OLZ up vs VEH	0.188491	1	0.999678	1.09491	1.09491	PCP+OLZ up vs PCP	0.146001	1	0.999419	0.905866	-1.10392	PCP down vs VEH
32300_s_at	TH	tyrosine hydroxylase	NM_000360 /// NM_199292 /// NM_199293	0.0648566	1	0.741184	0.448943	1	0.999954	1.05218	1.05218	AHA up vs VEH	0.127796	1	0.81859	0.898444	-1.11304	AOL down vs VEH	0.0561603	1	0.514474	1.13994	1.13994	HAL up vs VEH	0.783663	1	0.999992	0.981784	-1.01855	OLZ down vs VEH	0.780889	1	0.999678	0.980581	-1.0198	PCP+OLZ down vs PCP	0.920394	1	0.999419	1.00695	1.00695	PCP up vs VEH
33368_at	AZIN1	antizyme inhibitor 1	NM_015878 /// NM_148174	0.0648991	1	0.741184	0.785261	1	0.999954	1.01806	1.01806	AHA up vs VEH	0.110578	1	0.81859	0.895624	-1.11654	AOL down vs VEH	0.086146	1	0.514474	1.12177	1.12177	HAL up vs VEH	0.695626	1	0.999992	1.02604	1.02604	OLZ up vs VEH	0.388539	1	0.999678	1.06172	1.06172	PCP+OLZ up vs PCP	0.290524	1	0.999419	0.930152	-1.07509	PCP down vs VEH
38263_at	RYR2	ryanodine receptor 2 (cardiac)	NM_001035	0.0649047	1	0.741184	0.25501	1	0.999954	1.07981	1.07981	AHA up vs VEH	0.754084	1	0.907886	0.978544	-1.02193	AOL down vs VEH	0.0764072	1	0.514474	1.12865	1.12865	HAL up vs VEH	0.863329	1	0.999992	0.988551	-1.01158	OLZ down vs VEH	0.579779	1	0.999678	0.961685	-1.03984	PCP+OLZ down vs PCP	0.548422	1	0.999419	0.959186	-1.04255	PCP down vs VEH
36792_at	TPM1	tropomyosin 1 (alpha)	NM_000366 /// NM_001018004 /// NM_001018005 /// NM_001018006 /// NM_001018007 //	0.0649579	1	0.741184	0.470846	1	0.999954	1.04635	1.04635	AHA up vs VEH	0.403458	1	0.819966	0.947075	-1.05588	AOL down vs VEH	0.064055	1	0.514474	1.12598	1.12598	HAL up vs VEH	0.840725	1	0.999992	1.01267	1.01267	OLZ up vs VEH	0.408516	1	0.999678	0.946733	-1.05626	PCP+OLZ down vs PCP	0.716513	1	0.999419	0.976704	-1.02385	PCP down vs VEH
34848_at	FDFT1	farnesyl-diphosphate farnesyltransferase 1	NM_004462	0.0650886	1	0.741184	0.689995	1	0.999954	1.02605	1.02605	AHA up vs VEH	0.0709265	1	0.81859	0.884273	-1.13087	AOL down vs VEH	0.968622	1	0.977741	0.99747	-1.00254	HAL down vs VEH	0.0480369	1	0.999992	0.877472	-1.13964	OLZ down vs VEH	0.567719	1	0.999678	0.961915	-1.03959	PCP+OLZ down vs PCP	0.240574	1	0.999419	0.924036	-1.08221	PCP down vs VEH
1364_at	PTPRZ1	protein tyrosine phosphatase, receptor-type, Z polypeptide 1	NM_002851	0.0651148	1	0.741184	0.581563	1	0.999954	1.03869	1.03869	AHA up vs VEH	0.433285	1	0.819966	0.945578	-1.05755	AOL down vs VEH	0.0868968	1	0.514474	1.12752	1.12752	HAL up vs VEH	0.410962	1	0.999992	0.944804	-1.05842	OLZ down vs VEH	0.629912	1	0.999678	1.03555	1.03555	PCP+OLZ up vs PCP	0.215012	1	0.999419	0.914667	-1.09329	PCP down vs VEH
39032_at	TSC22D1	TSC22 domain family, member 1	NM_006022 /// NM_183422	0.0652686	1	0.741184	0.836222	1	0.999954	1.0123	1.0123	AHA up vs VEH	0.0457116	1	0.81859	0.881995	-1.13379	AOL down vs VEH	0.34734	1	0.552675	1.0575	1.0575	HAL up vs VEH	0.890133	1	0.999992	1.0082	1.0082	OLZ up vs VEH	0.912455	1	0.999678	1.00687	1.00687	PCP+OLZ up vs PCP	0.197496	1	0.999419	0.923284	-1.08309	PCP down vs VEH
32734_at	PPP2R5E	protein phosphatase 2, regulatory subunit B', epsilon isoform	NM_006246	0.0652859	1	0.741184	0.712245	1	0.999954	0.973879	-1.02682	AHA down vs VEH	0.0676058	1	0.81859	0.870551	-1.1487	AOL down vs VEH	0.240699	1	0.516024	1.0886	1.0886	HAL up vs VEH	0.293549	1	0.999992	1.07881	1.07881	OLZ up vs VEH	0.524563	1	0.999678	1.04934	1.04934	PCP+OLZ up vs PCP	0.32915	1	0.999419	0.929672	-1.07565	PCP down vs VEH
37273_at	ERBB4	v-erb-a erythroblastic leukemia viral oncogene homolog 4 (avian)	NM_001042599 /// NM_005235	0.0654044	1	0.741184	0.439255	1	0.999954	1.04703	1.04703	AHA up vs VEH	0.604243	1	0.856231	0.968707	-1.0323	AOL down vs VEH	0.043133	1	0.514474	1.13091	1.13091	HAL up vs VEH	0.901868	1	0.999992	1.00732	1.00732	OLZ up vs VEH	0.97121	1	0.999678	1.00225	1.00225	PCP+OLZ up vs PCP	0.387291	1	0.999419	0.948133	-1.0547	PCP down vs VEH
32394_s_at	RPL23	ribosomal protein L23	NM_000978	0.0655136	1	0.741184	0.170069	1	0.999954	1.08604	1.08604	AHA up vs VEH	0.669528	1	0.87612	0.974078	-1.02661	AOL down vs VEH	0.0215228	1	0.514474	1.152	1.152	HAL up vs VEH	0.221928	1	0.999992	1.07604	1.07604	OLZ up vs VEH	0.201658	1	0.999678	1.08409	1.08409	PCP+OLZ up vs PCP	0.493001	1	0.999419	0.958568	-1.04322	PCP down vs VEH
41779_at	RGS16	regulator of G-protein signaling 16	NM_002928	0.0656574	1	0.741184	0.394893	1	0.999954	1.04973	1.04973	AHA up vs VEH	0.0845745	1	0.81859	0.901823	-1.10886	AOL down vs VEH	0.17287	1	0.514474	1.0815	1.0815	HAL up vs VEH	0.599658	1	0.999992	0.970589	-1.0303	OLZ down vs VEH	0.803578	1	0.999678	1.01498	1.01498	PCP+OLZ up vs PCP	0.389253	1	0.999419	0.950397	-1.05219	PCP down vs VEH
1094_g_at	PPP2R1B	protein phosphatase 2 (formerly 2A), regulatory subunit A, beta isoform	NM_002716 /// NM_181699	0.0656959	1	0.741184	0.601408	1	0.999954	1.0367	1.0367	AHA up vs VEH	0.175555	1	0.81859	0.906914	-1.10264	AOL down vs VEH	0.106473	1	0.514474	1.11978	1.11978	HAL up vs VEH	0.951575	1	0.999992	1.00419	1.00419	OLZ up vs VEH	0.175533	1	0.999678	0.905347	-1.10455	PCP+OLZ down vs PCP	0.893634	1	0.999419	1.00958	1.00958	PCP up vs VEH
497_at	CLN3	ceroid-lipofuscinosis, neuronal 3	NM_000086 /// NM_001042432	0.0658523	1	0.741184	0.754291	1	0.999954	0.979329	-1.02111	AHA down vs VEH	0.134794	1	0.81859	0.900557	-1.11042	AOL down vs VEH	0.26295	1	0.521859	1.07819	1.07819	HAL up vs VEH	0.667674	1	0.999992	0.971738	-1.02908	OLZ down vs VEH	0.209927	1	0.999678	1.09304	1.09304	PCP+OLZ up vs PCP	0.0368479	1	0.999419	0.862019	-1.16007	PCP down vs VEH
39910_at	2010-03-02	membrane-associated ring finger (C3HC4) 2	NM_001005415 /// NM_001005416 /// NM_016496	0.065988	1	0.741184	0.666793	1	0.999954	1.02428	1.02428	AHA up vs VEH	0.167931	1	0.81859	0.922757	-1.08371	AOL down vs VEH	0.0406358	1	0.514474	1.1243	1.1243	HAL up vs VEH	0.698777	1	0.999992	1.02179	1.02179	OLZ up vs VEH	0.727593	1	0.999678	0.979785	-1.02063	PCP+OLZ down vs PCP	0.935325	1	0.999419	0.995334	-1.00469	PCP down vs VEH
34403_at	MFGE8	milk fat globule-EGF factor 8 protein	NM_001114614 /// NM_005928	0.0660863	1	0.741184	0.515709	1	0.999954	1.03573	1.03573	AHA up vs VEH	0.0193557	1	0.81859	0.873537	-1.14477	AOL down vs VEH	0.442355	1	0.593735	1.04242	1.04242	HAL up vs VEH	0.947836	1	0.999992	0.996482	-1.00353	OLZ down vs VEH	0.496598	1	0.999678	1.03943	1.03943	PCP+OLZ up vs PCP	0.350328	1	0.999419	0.948943	-1.0538	PCP down vs VEH
33247_at	PSMD14	proteasome (prosome, macropain) 26S subunit, non-ATPase, 14	NM_005805	0.0662242	1	0.741184	0.940537	1	0.999954	1.00408	1.00408	AHA up vs VEH	0.51099	1	0.827594	0.963425	-1.03796	AOL down vs VEH	0.0198168	1	0.514474	1.14114	1.14114	HAL up vs VEH	0.747534	1	0.999992	1.01775	1.01775	OLZ up vs VEH	0.403389	1	0.999678	1.04947	1.04947	PCP+OLZ up vs PCP	0.424293	1	0.999419	0.955608	-1.04645	PCP down vs VEH
35363_at	DDX17	DEAD (Asp-Glu-Ala-Asp) box polypeptide 17	NM_001098504 /// NM_001098505 /// NM_006386 /// NM_030881	0.0662786	1	0.741184	0.509308	1	0.999954	1.0326	1.0326	AHA up vs VEH	0.222374	1	0.81859	0.940059	-1.06376	AOL down vs VEH	0.0606043	1	0.514474	1.09761	1.09761	HAL up vs VEH	0.998106	1	0.999992	0.999885	-1.00012	OLZ down vs VEH	0.876761	1	0.999678	1.00795	1.00795	PCP+OLZ up vs PCP	0.421673	1	0.999419	0.96029	-1.04135	PCP down vs VEH
562_g_at	FSHR	follicle stimulating hormone receptor	NM_000145 /// NM_181446	0.0662915	1	0.741184	0.628676	1	0.999954	1.02628	1.02628	AHA up vs VEH	0.565694	1	0.842266	0.96861	-1.03241	AOL down vs VEH	0.0331083	1	0.514474	1.12484	1.12484	HAL up vs VEH	0.964399	1	0.999992	0.997613	-1.00239	OLZ down vs VEH	0.701981	1	0.999678	1.02183	1.02183	PCP+OLZ up vs PCP	0.339048	1	0.999419	0.948047	-1.0548	PCP down vs VEH
613_at	KRT5	keratin 5	NM_000424	0.0663143	1	0.741184	0.10047	1	0.999954	1.11145	1.11145	AHA up vs VEH	0.355835	1	0.81859	0.94111	-1.06258	AOL down vs VEH	0.0527397	1	0.514474	1.13371	1.13371	HAL up vs VEH	0.932663	1	0.999992	0.994676	-1.00535	OLZ down vs VEH	0.563085	1	0.999678	0.962184	-1.0393	PCP+OLZ down vs PCP	0.708927	1	0.999419	1.02475	1.02475	PCP up vs VEH
36254_at	TAC1	tachykinin, precursor 1	NM_003182 /// NM_013996 /// NM_013997 /// NM_013998	0.0663319	1	0.741184	0.672262	1	0.999954	0.972717	-1.02805	AHA down vs VEH	0.00719063	1	0.81859	0.826377	-1.2101	AOL down vs VEH	0.822967	1	0.861471	1.01472	1.01472	HAL up vs VEH	0.795028	1	0.999992	0.983169	-1.01712	OLZ down vs VEH	0.449027	1	0.999678	1.05364	1.05364	PCP+OLZ up vs PCP	0.697647	1	0.999419	0.974036	-1.02666	PCP down vs VEH
37034_at	ANP32A	acidic (leucine-rich) nuclear phosphoprotein 32 family, member A	NM_006305	0.0665846	1	0.741184	0.837723	1	0.999954	0.987119	-1.01305	AHA down vs VEH	0.540481	1	0.834505	0.96062	-1.04099	AOL down vs VEH	0.0294809	1	0.514474	1.15284	1.15284	HAL up vs VEH	0.361237	1	0.999992	1.05982	1.05982	OLZ up vs VEH	0.630873	1	0.999678	1.03258	1.03258	PCP+OLZ up vs PCP	0.45835	1	0.999419	0.952384	-1.05	PCP down vs VEH
34858_at	KCTD2	potassium channel tetramerisation domain containing 2	NM_015353	0.0665912	1	0.741184	0.908231	1	0.999954	0.994119	-1.00592	AHA down vs VEH	0.0784979	1	0.81859	0.9093	-1.09975	AOL down vs VEH	0.179271	1	0.514474	1.07202	1.07202	HAL up vs VEH	0.913108	1	0.999992	0.994432	-1.0056	OLZ down vs VEH	0.127558	1	0.999678	1.08694	1.08694	PCP+OLZ up vs PCP	0.105527	1	0.999419	0.916413	-1.09121	PCP down vs VEH
32814_at	IFIT1	interferon-induced protein with tetratricopeptide repeats 1	NM_001548	0.0666082	1	0.741184	0.505334	1	0.999954	1.0362	1.0362	AHA up vs VEH	0.199583	1	0.81859	1.07402	1.07402	AOL up vs VEH	0.0078063	1	0.514474	1.16012	1.16012	HAL up vs VEH	0.625779	1	0.999992	1.02634	1.02634	OLZ up vs VEH	0.484203	1	0.999678	0.961437	-1.04011	PCP+OLZ down vs PCP	0.674305	1	0.999419	1.02346	1.02346	PCP up vs VEH
1446_at	PSMA2	proteasome (prosome, macropain) subunit, alpha type, 2	NM_002787	0.0666644	1	0.741184	0.946202	1	0.999954	0.995379	-1.00464	AHA down vs VEH	0.412767	1	0.819966	0.94325	-1.06016	AOL down vs VEH	0.0295034	1	0.514474	1.16677	1.16677	HAL up vs VEH	0.486523	1	0.999992	1.04908	1.04908	OLZ up vs VEH	0.241944	1	0.999678	1.08909	1.08909	PCP+OLZ up vs PCP	0.354343	1	0.999419	0.935921	-1.06847	PCP down vs VEH
37795_at	ARSB	arylsulfatase B	NM_000046 /// NM_198709	0.0666772	1	0.741184	0.789425	1	0.999954	1.01622	1.01622	AHA up vs VEH	0.0642918	1	0.81859	0.888773	-1.12515	AOL down vs VEH	0.172401	1	0.514474	1.08674	1.08674	HAL up vs VEH	0.640972	1	0.999992	0.972275	-1.02852	OLZ down vs VEH	0.17666	1	0.999678	0.91696	-1.09056	PCP+OLZ down vs PCP	0.601819	1	0.999419	1.03313	1.03313	PCP up vs VEH
39710_at	C5orf13	chromosome 5 open reading frame 13	NM_001142474 /// NM_001142475 /// NM_001142476 /// NM_001142477 /// NM_001142478	0.0667212	1	0.741184	0.291867	1	0.999954	1.06837	1.06837	AHA up vs VEH	0.552054	1	0.836478	0.962322	-1.03915	AOL down vs VEH	0.0531643	1	0.514474	1.13142	1.13142	HAL up vs VEH	0.322289	1	0.999992	1.06401	1.06401	OLZ up vs VEH	0.905521	1	0.999678	0.992247	-1.00781	PCP+OLZ down vs PCP	0.542413	1	0.999419	0.961375	-1.04018	PCP down vs VEH
38437_at	CASC3	cancer susceptibility candidate 3	NM_007359	0.0670619	1	0.741184	0.699884	1	0.999954	1.02194	1.02194	AHA up vs VEH	0.0408567	1	0.81859	0.884819	-1.13017	AOL down vs VEH	0.286833	1	0.530183	1.06221	1.06221	HAL up vs VEH	0.544088	1	0.999992	1.03479	1.03479	OLZ up vs VEH	0.843628	1	0.999678	0.988385	-1.01175	PCP+OLZ down vs PCP	0.525367	1	0.999419	0.963586	-1.03779	PCP down vs VEH
1085_s_at	PLCG2	phospholipase C, gamma 2 (phosphatidylinositol-specific)	NM_002661	0.0673631	1	0.741184	0.412784	1	0.999954	1.04443	1.04443	AHA up vs VEH	0.429657	1	0.819966	0.957574	-1.04431	AOL down vs VEH	0.0304086	1	0.514474	1.12528	1.12528	HAL up vs VEH	0.952793	1	0.999992	1.00313	1.00313	OLZ up vs VEH	0.543852	1	0.999678	0.966717	-1.03443	PCP+OLZ down vs PCP	0.92759	1	0.999419	0.995039	-1.00499	PCP down vs VEH
38589_i_at	PTMA	prothymosin, alpha	NM_001099285 /// NM_002823	0.0673949	1	0.741184	0.630897	1	0.999954	1.03701	1.03701	AHA up vs VEH	0.0544756	1	0.81859	0.857263	-1.1665	AOL down vs VEH	0.439921	1	0.593304	1.0603	1.0603	HAL up vs VEH	0.62356	1	0.999992	0.963558	-1.03782	OLZ down vs VEH	0.153894	1	0.999678	1.12178	1.12178	PCP+OLZ up vs PCP	0.0633714	1	0.999419	0.861911	-1.16021	PCP down vs VEH
39347_at	AP2S1	adaptor-related protein complex 2, sigma 1 subunit	NM_004069 /// NM_021575	0.0677923	1	0.741184	0.886998	1	0.999954	1.00929	1.00929	AHA up vs VEH	0.100833	1	0.81859	0.893639	-1.11902	AOL down vs VEH	0.190401	1	0.514474	1.08999	1.08999	HAL up vs VEH	0.915527	1	0.999992	1.00693	1.00693	OLZ up vs VEH	0.0767134	1	0.999678	1.13181	1.13181	PCP+OLZ up vs PCP	0.0944736	1	0.999419	0.89153	-1.12167	PCP down vs VEH
1232_s_at	IGFBP1	insulin-like growth factor binding protein 1	NM_000596	0.0680078	1	0.741184	0.536243	1	0.999954	1.03828	1.03828	AHA up vs VEH	0.518876	1	0.82773	0.960272	-1.04137	AOL down vs VEH	0.032544	1	0.514474	1.14285	1.14285	HAL up vs VEH	0.53447	1	0.999992	0.962977	-1.03845	OLZ down vs VEH	0.246051	1	0.999678	0.928072	-1.0775	PCP+OLZ down vs PCP	0.498909	1	0.999419	1.04347	1.04347	PCP up vs VEH
915_at	IFIT1	interferon-induced protein with tetratricopeptide repeats 1	NM_001548	0.0680927	1	0.741184	0.730155	1	0.999954	1.0213	1.0213	AHA up vs VEH	0.704731	1	0.889851	1.02425	1.02425	AOL up vs VEH	0.0472371	1	0.514474	1.13245	1.13245	HAL up vs VEH	0.761715	1	0.999992	1.0187	1.0187	OLZ up vs VEH	0.0252524	1	0.999678	0.861779	-1.16039	PCP+OLZ down vs PCP	0.284463	1	0.999419	1.07059	1.07059	PCP up vs VEH
214_at	MSX1	msh homeobox 1	NM_002448	0.0682473	1	0.741184	0.298841	1	0.999954	1.0618	1.0618	AHA up vs VEH	0.80474	1	0.924809	0.985443	-1.01477	AOL down vs VEH	0.0220947	1	0.514474	1.14553	1.14553	HAL up vs VEH	0.432902	1	0.999992	1.04616	1.04616	OLZ up vs VEH	0.678844	1	0.999678	1.02533	1.02533	PCP+OLZ up vs PCP	0.478954	1	0.999419	0.958712	-1.04307	PCP down vs VEH
1447_at	PSMB1	proteasome (prosome, macropain) subunit, beta type, 1	NM_002793	0.0682477	1	0.741184	0.212816	1	0.999954	1.08008	1.08008	AHA up vs VEH	0.920665	1	0.970242	1.00633	1.00633	AOL up vs VEH	0.0166593	1	0.514474	1.16449	1.16449	HAL up vs VEH	0.0617958	1	0.999992	1.12413	1.12413	OLZ up vs VEH	0.314093	1	0.999678	1.06748	1.06748	PCP+OLZ up vs PCP	0.645499	1	0.999419	0.971222	-1.02963	PCP down vs VEH
AFFX-HUMGAPDH/M33197_M_at	GAPDH	glyceraldehyde-3-phosphate dehydrogenase	NM_002046	0.0683429	1	0.741184	0.941814	1	0.999954	0.996169	-1.00385	AHA down vs VEH	0.617015	1	0.859928	0.973118	-1.02762	AOL down vs VEH	0.0686128	1	0.514474	1.10285	1.10285	HAL up vs VEH	0.552681	1	0.999992	1.03179	1.03179	OLZ up vs VEH	0.0140526	1	0.999678	1.15211	1.15211	PCP+OLZ up vs PCP	0.217513	1	0.999419	0.934406	-1.0702	PCP down vs VEH
1399_at	TCEB1	transcription elongation factor B (SIII), polypeptide 1 (15kDa, elongin C)	NM_005648	0.0683505	1	0.741184	0.650164	1	0.999954	1.03341	1.03341	AHA up vs VEH	0.502148	1	0.825992	0.950853	-1.05169	AOL down vs VEH	0.0475259	1	0.514474	1.15861	1.15861	HAL up vs VEH	0.70723	1	0.999992	1.02758	1.02758	OLZ up vs VEH	0.121859	1	0.999678	1.12723	1.12723	PCP+OLZ up vs PCP	0.151345	1	0.999419	0.896703	-1.1152	PCP down vs VEH
1894_f_at	NF2	neurofibromin 2 (merlin)	NM_000268 /// NM_016418 /// NM_181825 /// NM_181828 /// NM_181829 /// NM_181830	0.0683753	1	0.741184	0.245032	1	0.999954	0.93325	-1.07152	AHA down vs VEH	0.25063	1	0.81859	0.93182	-1.07317	AOL down vs VEH	0.338923	1	0.549899	1.0583	1.0583	HAL up vs VEH	0.612342	1	0.999992	0.970549	-1.03035	OLZ down vs VEH	0.0165222	1	0.999678	1.16707	1.16707	PCP+OLZ up vs PCP	0.0467158	1	0.999419	0.882869	-1.13267	PCP down vs VEH
33334_at	ACYP1	acylphosphatase 1, erythrocyte (common) type	NM_001107 /// NM_203488	0.0684484	1	0.741184	0.95021	1	0.999954	0.995894	-1.00412	AHA down vs VEH	0.10579	1	0.81859	0.893862	-1.11874	AOL down vs VEH	0.356572	1	0.553416	1.06299	1.06299	HAL up vs VEH	0.531031	1	0.999992	0.959461	-1.04225	OLZ down vs VEH	0.0497194	1	0.999678	1.14992	1.14992	PCP+OLZ up vs PCP	0.0302553	1	0.999419	0.858465	-1.16487	PCP down vs VEH
31335_at	IGF1R	insulin-like growth factor 1 receptor	NM_000875	0.0688065	1	0.741184	0.187402	1	0.999954	1.07161	1.07161	AHA up vs VEH	0.0599226	1	0.81859	0.901801	-1.10889	AOL down vs VEH	0.379385	1	0.563615	1.04689	1.04689	HAL up vs VEH	0.685699	1	0.999992	0.979209	-1.02123	OLZ down vs VEH	0.788872	1	0.999678	0.985479	-1.01473	PCP+OLZ down vs PCP	0.751646	1	0.999419	0.983134	-1.01716	PCP down vs VEH
940_g_at	NF1	neurofibromin 1	NM_000267 /// NM_001042492 /// NM_001128147	0.0688548	1	0.741184	0.884338	1	0.999954	0.990724	-1.00936	AHA down vs VEH	0.0475753	1	0.81859	0.873902	-1.14429	AOL down vs VEH	0.161179	1	0.514474	1.09519	1.09519	HAL up vs VEH	0.981234	1	0.999992	1.00151	1.00151	OLZ up vs VEH	0.798409	1	0.999678	0.982916	-1.01738	PCP+OLZ down vs PCP	0.524472	1	0.999419	0.958545	-1.04325	PCP down vs VEH
33149_at	CLP1	CLP1, cleavage and polyadenylation factor I subunit, homolog (S. cerevisiae)	NM_001142597 /// NM_006831	0.0689457	1	0.741184	0.291132	1	0.999954	1.06206	1.06206	AHA up vs VEH	0.375398	1	0.81859	0.949148	-1.05358	AOL down vs VEH	0.0236588	1	0.514474	1.14177	1.14177	HAL up vs VEH	0.460799	1	0.999992	1.0428	1.0428	OLZ up vs VEH	0.955794	1	0.999678	1.00331	1.00331	PCP+OLZ up vs PCP	0.842433	1	0.999419	0.988409	-1.01173	PCP down vs VEH
733_at	MUC2	mucin 2, oligomeric mucus/gel-forming	NM_002457	0.0689691	1	0.741184	0.768858	1	0.999954	1.02226	1.02226	AHA up vs VEH	0.166895	1	0.81859	0.897226	-1.11455	AOL down vs VEH	0.0891879	1	0.514474	1.13854	1.13854	HAL up vs VEH	0.51102	1	0.999992	0.951846	-1.05059	OLZ down vs VEH	0.214454	1	0.999678	0.905859	-1.10392	PCP+OLZ down vs PCP	0.717753	1	0.999419	1.02845	1.02845	PCP up vs VEH
872_i_at	IRS1	insulin receptor substrate 1	NM_005544	0.069045	1	0.741184	0.672483	1	0.999954	1.02975	1.02975	AHA up vs VEH	0.79323	1	0.920537	0.981384	-1.01897	AOL down vs VEH	0.0264316	1	0.514474	1.17225	1.17225	HAL up vs VEH	0.666241	1	0.999992	0.970533	-1.03036	OLZ down vs VEH	0.92509	1	0.999678	0.993167	-1.00688	PCP+OLZ down vs PCP	0.582673	1	0.999419	0.961272	-1.04029	PCP down vs VEH
35856_r_at	GRIK1	glutamate receptor, ionotropic, kainate 1	NM_000830 /// NM_175611	0.0691455	1	0.741184	0.215515	1	0.999954	1.07819	1.07819	AHA up vs VEH	0.38966	1	0.819966	0.94761	-1.05529	AOL down vs VEH	0.0280209	1	0.514474	1.14631	1.14631	HAL up vs VEH	0.88333	1	0.999992	0.991208	-1.00887	OLZ down vs VEH	0.945666	1	0.999678	0.995692	-1.00433	PCP+OLZ down vs PCP	0.993855	1	0.999419	1.00048	1.00048	PCP up vs VEH
38974_at	PARK7	Parkinson disease (autosomal recessive, early onset) 7	NM_001123377 /// NM_007262	0.069264	1	0.741184	0.179866	1	0.999954	1.0743	1.0743	AHA up vs VEH	0.975554	1	0.991935	1.00168	1.00168	AOL up vs VEH	0.00611386	1	0.514474	1.16452	1.16452	HAL up vs VEH	0.567899	1	0.999992	1.03069	1.03069	OLZ up vs VEH	0.502707	1	0.999678	1.03808	1.03808	PCP+OLZ up vs PCP	0.940085	1	0.999419	0.995898	-1.00412	PCP down vs VEH
41206_r_at	COX6A1	cytochrome c oxidase subunit VIa polypeptide 1	NM_004373	0.0694532	1	0.741184	0.423621	1	0.999954	1.04605	1.04605	AHA up vs VEH	0.469883	1	0.821908	0.958837	-1.04293	AOL down vs VEH	0.0291851	1	0.514474	1.13446	1.13446	HAL up vs VEH	0.982401	1	0.999992	0.998765	-1.00124	OLZ down vs VEH	0.11658	1	0.999678	1.09867	1.09867	PCP+OLZ up vs PCP	0.977188	1	0.999419	1.00166	1.00166	PCP up vs VEH
36097_at	IER2	immediate early response 2	NM_004907	0.0696627	1	0.741184	0.782427	1	0.999954	0.980407	-1.01998	AHA down vs VEH	0.0544475	1	0.81859	0.86409	-1.15729	AOL down vs VEH	0.662215	1	0.739691	1.03182	1.03182	HAL up vs VEH	0.610506	1	0.999992	1.03722	1.03722	OLZ up vs VEH	0.979874	1	0.999678	0.9981	-1.0019	PCP+OLZ down vs PCP	0.129922	1	0.999419	0.892197	-1.12083	PCP down vs VEH
36605_at	TCF4	transcription factor 4	NM_001083962 /// NM_003199	0.0697368	1	0.741184	0.316949	1	0.999954	0.941307	-1.06235	AHA down vs VEH	0.0809993	1	0.81859	0.895281	-1.11697	AOL down vs VEH	0.936179	1	0.951956	1.00482	1.00482	HAL up vs VEH	0.0437638	1	0.999992	0.883021	-1.13248	OLZ down vs VEH	0.482315	1	0.999678	0.956421	-1.04556	PCP+OLZ down vs PCP	0.0923363	1	0.999419	0.898819	-1.11257	PCP down vs VEH
1562_g_at	DUSP8	dual specificity phosphatase 8	NM_004420	0.0699482	1	0.741184	0.399153	1	0.999954	1.06268	1.06268	AHA up vs VEH	0.0290853	1	0.81859	0.845951	-1.1821	AOL down vs VEH	0.647072	1	0.728525	0.967634	-1.03345	HAL down vs VEH	0.624019	1	0.999992	1.03586	1.03586	OLZ up vs VEH	0.800669	1	0.999678	1.01927	1.01927	PCP+OLZ up vs PCP	0.250582	1	0.999419	0.917454	-1.08997	PCP down vs VEH
32418_at	PDE1C	phosphodiesterase 1C, calmodulin-dependent 70kDa	NM_005020	0.070143	1	0.741184	0.355628	1	0.999954	1.0515	1.0515	AHA up vs VEH	0.567305	1	0.842862	0.968446	-1.03258	AOL down vs VEH	0.0165364	1	0.514474	1.14417	1.14417	HAL up vs VEH	0.678389	1	0.999992	0.977808	-1.0227	OLZ down vs VEH	0.839952	1	0.999678	1.01156	1.01156	PCP+OLZ up vs PCP	0.533061	1	0.999419	1.03561	1.03561	PCP up vs VEH
32573_at	SFRS9	splicing factor, arginine/serine-rich 9	NM_003769	0.0702237	1	0.741184	0.275436	1	0.999954	1.06927	1.06927	AHA up vs VEH	0.229988	1	0.81859	0.926449	-1.07939	AOL down vs VEH	0.0711687	1	0.514474	1.11892	1.11892	HAL up vs VEH	0.856093	1	0.999992	1.01111	1.01111	OLZ up vs VEH	0.171899	1	0.999678	1.09279	1.09279	PCP+OLZ up vs PCP	0.316506	1	0.999419	0.938348	-1.0657	PCP down vs VEH
1985_s_at	NME1	non-metastatic cells 1, protein (NM23A) expressed in	NM_000269 /// NM_198175	0.0703054	1	0.741184	0.192601	1	0.999954	1.07623	1.07623	AHA up vs VEH	0.670655	1	0.876232	0.975743	-1.02486	AOL down vs VEH	0.0093603	1	0.514474	1.16372	1.16372	HAL up vs VEH	0.267253	1	0.999992	1.06434	1.06434	OLZ up vs VEH	0.378649	1	0.999678	1.05331	1.05331	PCP+OLZ up vs PCP	0.92741	1	0.999419	0.994753	-1.00527	PCP down vs VEH
AFFX-HUMGAPDH/M33197_3_at	GAPDH	glyceraldehyde-3-phosphate dehydrogenase	NM_002046	0.0703556	1	0.741184	0.143496	1	0.999954	1.07147	1.07147	AHA up vs VEH	0.354552	1	0.81859	0.95618	-1.04583	AOL down vs VEH	0.0397378	1	0.514474	1.10342	1.10342	HAL up vs VEH	0.116606	1	0.999992	1.07703	1.07703	OLZ up vs VEH	0.220307	1	0.999678	1.06251	1.06251	PCP+OLZ up vs PCP	0.947317	1	0.999419	1.00319	1.00319	PCP up vs VEH
35351_at	RBM4	RNA binding motif protein 4	NM_002896	0.0703561	1	0.741184	0.390146	1	0.999954	1.05411	1.05411	AHA up vs VEH	0.0239227	1	0.81859	0.862829	-1.15898	AOL down vs VEH	0.87001	1	0.898953	1.01004	1.01004	HAL up vs VEH	0.926173	1	0.999992	0.994362	-1.00567	OLZ down vs VEH	0.391541	1	0.999678	1.05687	1.05687	PCP+OLZ up vs PCP	0.164817	1	0.999419	0.914916	-1.093	PCP down vs VEH
1397_at	MAP3K11	mitogen-activated protein kinase kinase kinase 11	NM_002419	0.0703675	1	0.741184	0.78849	1	0.999954	0.981773	-1.01857	AHA down vs VEH	0.0154011	1	0.81859	0.83634	-1.19569	AOL down vs VEH	0.380073	1	0.563692	1.06233	1.06233	HAL up vs VEH	0.507839	1	0.999992	0.955503	-1.04657	OLZ down vs VEH	0.500158	1	0.999678	1.05001	1.05001	PCP+OLZ up vs PCP	0.223197	1	0.999419	0.916379	-1.09125	PCP down vs VEH
39069_at	AEBP1	AE binding protein 1	NM_001129	0.0703901	1	0.741184	0.605484	1	0.999954	0.973326	-1.0274	AHA down vs VEH	0.031267	1	0.81859	0.886829	-1.12761	AOL down vs VEH	0.768643	1	0.820846	1.0155	1.0155	HAL up vs VEH	0.595252	1	0.999992	0.972574	-1.0282	OLZ down vs VEH	0.226036	1	0.999678	1.06956	1.06956	PCP+OLZ up vs PCP	0.019703	1	0.999419	0.877304	-1.13986	PCP down vs VEH
1977_s_at	ETS1	v-ets erythroblastosis virus E26 oncogene homolog 1 (avian)	NM_001143820 /// NM_001162422 /// NM_005238	0.0703914	1	0.741184	0.522214	1	0.999954	0.963527	-1.03785	AHA down vs VEH	0.0482945	1	0.81859	0.88565	-1.12911	AOL down vs VEH	0.251236	1	0.51817	1.06932	1.06932	HAL up vs VEH	0.193444	1	0.999992	0.926673	-1.07913	OLZ down vs VEH	0.778001	1	0.999678	0.982951	-1.01734	PCP+OLZ down vs PCP	0.388348	1	0.999419	0.949338	-1.05337	PCP down vs VEH
34591_at	DIO3	deiodinase, iodothyronine, type III	NM_001362	0.0705348	1	0.741184	0.110542	1	0.999954	1.09002	1.09002	AHA up vs VEH	0.367174	1	0.81859	0.951409	-1.05107	AOL down vs VEH	0.0208262	1	0.514474	1.13566	1.13566	HAL up vs VEH	0.610699	1	0.999992	1.02745	1.02745	OLZ up vs VEH	0.959559	1	0.999678	1.00284	1.00284	PCP+OLZ up vs PCP	0.580942	1	0.999419	1.03089	1.03089	PCP up vs VEH
743_at	NAP1L3	nucleosome assembly protein 1-like 3	NM_004538	0.0705571	1	0.741184	0.587613	1	0.999954	1.03919	1.03919	AHA up vs VEH	0.459526	1	0.821908	0.947121	-1.05583	AOL down vs VEH	0.0290846	1	0.514474	1.17281	1.17281	HAL up vs VEH	0.223042	1	0.999992	1.09096	1.09096	OLZ up vs VEH	0.40336	1	0.999678	1.06452	1.06452	PCP+OLZ up vs PCP	0.479665	1	0.999419	0.949365	-1.05334	PCP down vs VEH
40105_at	MUT	methylmalonyl Coenzyme A mutase	NM_000255	0.0705873	1	0.741184	0.621991	1	0.999954	0.967539	-1.03355	AHA down vs VEH	0.0408902	1	0.81859	0.864693	-1.15648	AOL down vs VEH	0.46105	1	0.60377	1.05068	1.05068	HAL up vs VEH	0.573878	1	0.999992	0.963042	-1.03838	OLZ down vs VEH	0.689562	1	0.999678	1.02853	1.02853	PCP+OLZ up vs PCP	0.0676735	1	0.999419	0.878688	-1.13806	PCP down vs VEH
36690_at	NR3C1	nuclear receptor subfamily 3, group C, member 1 (glucocorticoid receptor)	NM_000176 /// NM_001018074 /// NM_001018075 /// NM_001018076 /// NM_001018077 //	0.0706223	1	0.741184	0.286161	1	0.999954	0.932769	-1.07208	AHA down vs VEH	0.0980652	1	0.81859	0.893253	-1.1195	AOL down vs VEH	0.234975	1	0.516024	1.08073	1.08073	HAL up vs VEH	0.839734	1	0.999992	0.986985	-1.01319	OLZ down vs VEH	0.38496	1	0.999678	1.06134	1.06134	PCP+OLZ up vs PCP	0.0895927	1	0.999419	0.890404	-1.12309	PCP down vs VEH
41212_r_at	EIF4H	eukaryotic translation initiation factor 4H	NM_022170 /// NM_031992	0.0708433	1	0.741184	0.156332	1	0.999954	1.09731	1.09731	AHA up vs VEH	0.842379	1	0.938796	0.986787	-1.01339	AOL down vs VEH	0.0330714	1	0.514474	1.1526	1.1526	HAL up vs VEH	0.0974931	1	0.999992	1.11527	1.11527	OLZ up vs VEH	0.0718273	1	0.999678	1.13337	1.13337	PCP+OLZ up vs PCP	0.462982	1	0.999419	0.951886	-1.05055	PCP down vs VEH
37581_at	PPP6C	protein phosphatase 6, catalytic subunit	NM_001123355 /// NM_001123369 /// NM_002721	0.0710017	1	0.741184	0.528244	1	0.999954	0.965666	-1.03555	AHA down vs VEH	0.0303525	1	0.81859	0.880084	-1.13626	AOL down vs VEH	0.550197	1	0.662107	1.03364	1.03364	HAL up vs VEH	0.158674	1	0.999992	0.924118	-1.08211	OLZ down vs VEH	0.352088	1	0.999678	1.05595	1.05595	PCP+OLZ up vs PCP	0.0491194	1	0.999419	0.890874	-1.12249	PCP down vs VEH
38675_at	SNRPC	small nuclear ribonucleoprotein polypeptide C	NM_003093	0.0710959	1	0.741184	0.229251	1	0.999954	1.06631	1.06631	AHA up vs VEH	0.768198	1	0.912823	0.983993	-1.01627	AOL down vs VEH	0.0135606	1	0.514474	1.14573	1.14573	HAL up vs VEH	0.528992	1	0.999992	1.03395	1.03395	OLZ up vs VEH	0.72169	1	0.999678	1.02005	1.02005	PCP+OLZ up vs PCP	0.720241	1	0.999419	0.980556	-1.01983	PCP down vs VEH
35270_at	SNRPD2	small nuclear ribonucleoprotein D2 polypeptide 16.5kDa	NM_004597 /// NM_177542	0.0711324	1	0.741184	0.0640504	1	0.999954	1.09323	1.09323	AHA up vs VEH	0.694119	1	0.885206	0.981023	-1.01934	AOL down vs VEH	0.0114713	1	0.514474	1.13219	1.13219	HAL up vs VEH	0.119116	1	0.999992	1.07736	1.07736	OLZ up vs VEH	0.619303	1	0.999678	1.02495	1.02495	PCP+OLZ up vs PCP	0.641836	1	0.999419	1.02295	1.02295	PCP up vs VEH
33892_at	PKP2	plakophilin 2	NM_001005242 /// NM_004572	0.0715795	1	0.741184	0.367508	1	0.999954	1.05074	1.05074	AHA up vs VEH	0.798923	1	0.92188	0.9857	-1.01451	AOL down vs VEH	0.0257372	1	0.514474	1.13425	1.13425	HAL up vs VEH	0.453927	1	0.999992	1.04192	1.04192	OLZ up vs VEH	0.203322	1	0.999678	0.928707	-1.07677	PCP+OLZ down vs PCP	0.671809	1	0.999419	1.02429	1.02429	PCP up vs VEH
319_g_at	H1FX	H1 histone family, member X	NM_006026	0.0716265	1	0.741184	0.862044	1	0.999954	1.0115	1.0115	AHA up vs VEH	0.022469	1	0.81859	0.851371	-1.17458	AOL down vs VEH	0.977847	1	0.984266	1.00183	1.00183	HAL up vs VEH	0.930694	1	0.999992	0.994294	-1.00574	OLZ down vs VEH	0.343191	1	0.999678	1.06829	1.06829	PCP+OLZ up vs PCP	0.0501545	1	0.999419	0.872005	-1.14678	PCP down vs VEH
41634_at	SECISBP2L	SECIS binding protein 2-like	NM_014701	0.0716295	1	0.741184	0.418652	1	0.999954	1.05148	1.05148	AHA up vs VEH	0.299755	1	0.81859	0.935401	-1.06906	AOL down vs VEH	0.030762	1	0.514474	1.14769	1.14769	HAL up vs VEH	0.778304	1	0.999992	1.01756	1.01756	OLZ up vs VEH	0.468274	1	0.999678	1.0485	1.0485	PCP+OLZ up vs PCP	0.517428	1	0.999419	0.9593	-1.04243	PCP down vs VEH
1972_s_at	MAP2	microtubule-associated protein 2	NM_001039538 /// NM_002374 /// NM_031845 /// NM_031847	0.0718677	1	0.741184	0.201525	1	0.999954	0.91032	-1.09852	AHA down vs VEH	0.0827405	1	0.81859	0.87522	-1.14257	AOL down vs VEH	0.249247	1	0.517751	1.08827	1.08827	HAL up vs VEH	0.490429	1	0.999992	0.950903	-1.05163	OLZ down vs VEH	0.274039	1	0.999678	1.08814	1.08814	PCP+OLZ up vs PCP	0.100454	1	0.999419	0.881559	-1.13435	PCP down vs VEH
37578_at	AFAP1	actin filament associated protein 1	NM_001134647 /// NM_198595	0.0719069	1	0.741184	0.957444	1	0.999954	1.00312	1.00312	AHA up vs VEH	0.124614	1	0.81859	0.909964	-1.09894	AOL down vs VEH	0.338305	1	0.549796	1.05793	1.05793	HAL up vs VEH	0.673804	1	0.999992	0.975666	-1.02494	OLZ down vs VEH	0.123422	1	0.999678	0.908165	-1.10112	PCP+OLZ down vs PCP	0.694958	1	0.999419	0.976514	-1.02405	PCP down vs VEH
40961_at	SMARCA2	SWI/SNF related, matrix associated, actin dependent regulator of chromatin, subf	NM_003070 /// NM_139045	0.0720007	1	0.741184	0.943145	1	0.999954	1.0051	1.0051	AHA up vs VEH	0.0911526	1	0.81859	0.880581	-1.13561	AOL down vs VEH	0.330831	1	0.54709	1.07236	1.07236	HAL up vs VEH	0.615568	1	0.999992	1.03656	1.03656	OLZ up vs VEH	0.181234	1	0.999678	1.10704	1.10704	PCP+OLZ up vs PCP	0.0715784	1	0.999419	0.872712	-1.14585	PCP down vs VEH
38566_at	COL10A1	collagen, type X, alpha 1	NM_000493	0.0720435	1	0.741184	0.341788	1	0.999954	1.05241	1.05241	AHA up vs VEH	0.913444	1	0.967044	0.994011	-1.00602	AOL down vs VEH	0.027643	1	0.514474	1.12921	1.12921	HAL up vs VEH	0.728629	1	0.999992	0.981626	-1.01872	OLZ down vs VEH	0.0901914	1	0.999678	0.907441	-1.102	PCP+OLZ down vs PCP	0.103207	1	0.999419	1.0961	1.0961	PCP up vs VEH
33922_at	PRDM2	PR domain containing 2, with ZNF domain	NM_001007257 /// NM_001135610 /// NM_012231 /// NM_015866	0.0721311	1	0.741184	0.891527	1	0.999954	1.00645	1.00645	AHA up vs VEH	0.133209	1	0.81859	0.928349	-1.07718	AOL down vs VEH	0.133155	1	0.514474	1.07452	1.07452	HAL up vs VEH	0.193853	1	0.999992	1.0639	1.0639	OLZ up vs VEH	0.727578	1	0.999678	1.01745	1.01745	PCP+OLZ up vs PCP	0.530209	1	0.999419	0.969738	-1.03121	PCP down vs VEH
33355_at	PBX1	pre-B-cell leukemia homeobox 1	NM_002585	0.0721632	1	0.741184	0.442099	1	0.999954	1.05124	1.05124	AHA up vs VEH	0.432305	1	0.819966	0.948542	-1.05425	AOL down vs VEH	0.0314914	1	0.514474	1.15452	1.15452	HAL up vs VEH	0.97895	1	0.999992	1.00171	1.00171	OLZ up vs VEH	0.592237	1	0.999678	0.964073	-1.03727	PCP+OLZ down vs PCP	0.884895	1	0.999419	0.990335	-1.00976	PCP down vs VEH
37324_at	TFRC	transferrin receptor (p90, CD71)	NM_001128148 /// NM_003234	0.072507	1	0.741184	0.325077	1	0.999954	1.0515	1.0515	AHA up vs VEH	0.810314	1	0.925964	0.987484	-1.01267	AOL down vs VEH	0.0287022	1	0.514474	1.12135	1.12135	HAL up vs VEH	0.0118277	1	0.999992	1.14247	1.14247	OLZ up vs VEH	0.788255	1	0.999678	1.01445	1.01445	PCP+OLZ up vs PCP	0.472634	1	0.999419	1.03857	1.03857	PCP up vs VEH
37552_at	KCNK1	potassium channel, subfamily K, member 1	NM_002245	0.072626	1	0.741184	0.538862	1	0.999954	0.964196	-1.03713	AHA down vs VEH	0.328246	1	0.81859	0.941535	-1.0621	AOL down vs VEH	0.0345936	1	0.514474	1.13754	1.13754	HAL up vs VEH	0.800554	1	0.999992	1.01507	1.01507	OLZ up vs VEH	0.566516	1	0.999678	1.03644	1.03644	PCP+OLZ up vs PCP	0.577883	1	0.999419	0.966396	-1.03477	PCP down vs VEH
38396_at	MAP1B	microtubule-associated protein 1B	NM_005909	0.0726309	1	0.741184	0.332735	1	0.999954	1.05642	1.05642	AHA up vs VEH	0.149026	1	0.81859	0.918283	-1.08899	AOL down vs VEH	0.088832	1	0.514474	1.10263	1.10263	HAL up vs VEH	0.255449	1	0.999992	1.06673	1.06673	OLZ up vs VEH	0.729562	1	0.999678	1.02073	1.02073	PCP+OLZ up vs PCP	0.709847	1	0.999419	0.978513	-1.02196	PCP down vs VEH
36476_at	BRD8	bromodomain containing 8	NM_001164326 /// NM_006696 /// NM_139199 /// NM_183359	0.0726932	1	0.741184	0.659181	1	0.999954	0.970023	-1.0309	AHA down vs VEH	0.0194926	1	0.81859	0.841315	-1.18862	AOL down vs VEH	0.527755	1	0.646788	1.0446	1.0446	HAL up vs VEH	0.64245	1	0.999992	1.03256	1.03256	OLZ up vs VEH	0.446621	1	0.999678	0.946073	-1.057	PCP+OLZ down vs PCP	0.548165	1	0.999419	1.04391	1.04391	PCP up vs VEH
1708_at	MAPK10	mitogen-activated protein kinase 10	NM_002753 /// NM_138980 /// NM_138981 /// NM_138982	0.0730715	1	0.741184	0.944008	1	0.999954	1.0047	1.0047	AHA up vs VEH	0.434005	1	0.819966	0.947133	-1.05582	AOL down vs VEH	0.0920391	1	0.514474	1.1216	1.1216	HAL up vs VEH	0.206171	1	0.999992	1.08914	1.08914	OLZ up vs VEH	0.206573	1	0.999678	1.09398	1.09398	PCP+OLZ up vs PCP	0.190516	1	0.999419	0.912418	-1.09599	PCP down vs VEH
36933_at	NDRG1	N-myc downstream regulated 1	NM_001135242 /// NM_006096	0.0731298	1	0.741184	0.785923	1	0.999954	0.983691	-1.01658	AHA down vs VEH	0.181543	1	0.81859	0.91884	-1.08833	AOL down vs VEH	0.348804	1	0.552859	1.05868	1.05868	HAL up vs VEH	0.864065	1	0.999992	0.989692	-1.01042	OLZ down vs VEH	0.0851297	1	0.999678	1.11838	1.11838	PCP+OLZ up vs PCP	0.0217317	1	0.999419	0.861545	-1.16071	PCP down vs VEH
1353_g_at	IL8RA	interleukin 8 receptor, alpha	NM_000634	0.073285	1	0.741184	0.702181	1	0.999954	0.974238	-1.02644	AHA down vs VEH	0.0999134	1	0.81859	0.888523	-1.12546	AOL down vs VEH	0.239723	1	0.516024	1.08428	1.08428	HAL up vs VEH	0.83328	1	0.999992	0.985744	-1.01446	OLZ down vs VEH	0.323123	1	0.999678	1.07401	1.07401	PCP+OLZ up vs PCP	0.0672239	1	0.999419	0.876169	-1.14133	PCP down vs VEH
36910_at	MAP2K4	mitogen-activated protein kinase kinase 4	NM_003010	0.0735391	1	0.741184	0.206244	1	0.999954	1.07848	1.07848	AHA up vs VEH	0.32155	1	0.81859	0.940773	-1.06296	AOL down vs VEH	0.0470922	1	0.514474	1.12814	1.12814	HAL up vs VEH	0.232477	1	0.999992	1.0739	1.0739	OLZ up vs VEH	0.93112	1	0.999678	0.994632	-1.0054	PCP+OLZ down vs PCP	0.922312	1	0.999419	0.994043	-1.00599	PCP down vs VEH
1256_at	PTPRD	protein tyrosine phosphatase, receptor type, D	NM_001040712 /// NM_002839 /// NM_130391 /// NM_130392 /// NM_130393	0.0736124	1	0.741184	0.164294	1	0.999954	0.914857	-1.09307	AHA down vs VEH	0.0507827	1	0.81859	0.87726	-1.13991	AOL down vs VEH	0.34945	1	0.552859	1.06125	1.06125	HAL up vs VEH	0.850974	1	0.999992	0.988201	-1.01194	OLZ down vs VEH	0.84517	1	0.999678	1.01307	1.01307	PCP+OLZ up vs PCP	0.179482	1	0.999419	0.914955	-1.09295	PCP down vs VEH
38775_at	LRP1	low density lipoprotein-related protein 1 (alpha-2-macroglobulin receptor)	NM_002332	0.0736742	1	0.741184	0.866134	1	0.999954	1.01002	1.01002	AHA up vs VEH	0.092488	1	0.81859	0.900389	-1.11063	AOL down vs VEH	0.452236	1	0.599264	1.04564	1.04564	HAL up vs VEH	0.833101	1	0.999992	1.01255	1.01255	OLZ up vs VEH	0.084085	1	0.999678	1.116	1.116	PCP+OLZ up vs PCP	0.0380038	1	0.999419	0.877355	-1.13979	PCP down vs VEH
37548_at	BBS9	Bardet-Biedl syndrome 9	NM_001033604 /// NM_001033605 /// NM_014451 /// NM_198428	0.0738468	1	0.741184	0.299539	1	0.999954	1.05808	1.05808	AHA up vs VEH	0.637185	1	0.865213	0.973942	-1.02675	AOL down vs VEH	0.023055	1	0.514474	1.13556	1.13556	HAL up vs VEH	0.717752	1	0.999992	1.01974	1.01974	OLZ up vs VEH	0.301178	1	0.999678	1.06102	1.06102	PCP+OLZ up vs PCP	0.398406	1	0.999419	0.953626	-1.04863	PCP down vs VEH
37580_at	SH3GL3	SH3-domain GRB2-like 3	NM_003027 /// NR_026799	0.073933	1	0.741184	0.282419	1	0.999954	1.07651	1.07651	AHA up vs VEH	0.386413	1	0.819966	0.94055	-1.06321	AOL down vs VEH	0.0338762	1	0.514474	1.16046	1.16046	HAL up vs VEH	0.165027	1	0.999992	1.10044	1.10044	OLZ up vs VEH	0.773946	1	0.999678	0.979619	-1.0208	PCP+OLZ down vs PCP	0.897823	1	0.999419	1.00909	1.00909	PCP up vs VEH
40140_at	RNF103	ring finger protein 103	NM_005667	0.0739882	1	0.741184	0.891699	1	0.999954	1.00846	1.00846	AHA up vs VEH	0.484241	1	0.824989	0.956067	-1.04595	AOL down vs VEH	0.0525185	1	0.514474	1.13093	1.13093	HAL up vs VEH	0.758576	1	0.999992	1.01921	1.01921	OLZ up vs VEH	0.351895	1	0.999678	1.0629	1.0629	PCP+OLZ up vs PCP	0.178335	1	0.999419	0.916392	-1.09124	PCP down vs VEH
39916_r_at	RPS15	ribosomal protein S15	NM_001018	0.074011	1	0.741184	0.415096	1	0.999954	1.04455	1.04455	AHA up vs VEH	0.768601	1	0.912823	1.01635	1.01635	AOL up vs VEH	0.0188262	1	0.514474	1.13862	1.13862	HAL up vs VEH	0.219491	1	0.999992	1.06828	1.06828	OLZ up vs VEH	0.151134	1	0.999678	1.08502	1.08502	PCP+OLZ up vs PCP	0.325628	1	0.999419	0.946898	-1.05608	PCP down vs VEH
36142_at	ATXN1	ataxin 1	NM_000332 /// NM_001128164	0.074013	1	0.741184	0.618165	1	0.999954	0.962986	-1.03844	AHA down vs VEH	0.0855055	1	0.81859	0.871899	-1.14692	AOL down vs VEH	0.186371	1	0.514474	1.10627	1.10627	HAL up vs VEH	0.610214	1	0.999992	1.03933	1.03933	OLZ up vs VEH	0.387486	1	0.999678	1.07152	1.07152	PCP+OLZ up vs PCP	0.187267	1	0.999419	0.90088	-1.11003	PCP down vs VEH
763_at	GMFB	glia maturation factor, beta	NM_004124	0.0742204	1	0.741184	0.604306	1	0.999954	1.02932	1.02932	AHA up vs VEH	0.362404	1	0.81859	0.948626	-1.05416	AOL down vs VEH	0.0670227	1	0.514474	1.10989	1.10989	HAL up vs VEH	0.332321	1	0.999992	1.0558	1.0558	OLZ up vs VEH	0.976493	1	0.999678	0.998275	-1.00173	PCP+OLZ down vs PCP	0.47397	1	0.999419	0.959424	-1.04229	PCP down vs VEH
1102_s_at	NR3C1	nuclear receptor subfamily 3, group C, member 1 (glucocorticoid receptor)	NM_000176 /// NM_001018074 /// NM_001018075 /// NM_001018076 /// NM_001018077 //	0.0746056	1	0.741184	0.0906389	1	0.999954	0.891635	-1.12153	AHA down vs VEH	0.0878055	1	0.81859	0.887132	-1.12723	AOL down vs VEH	0.567133	1	0.67355	1.03888	1.03888	HAL up vs VEH	0.402851	1	0.999992	0.945643	-1.05748	OLZ down vs VEH	0.806081	1	0.999678	1.01734	1.01734	PCP+OLZ up vs PCP	0.0532232	1	0.999419	0.872383	-1.14629	PCP down vs VEH
32564_at	SEC61B	Sec61 beta subunit	NM_006808	0.0748364	1	0.741184	0.882033	1	0.999954	0.989208	-1.01091	AHA down vs VEH	0.32115	1	0.81859	0.92725	-1.07846	AOL down vs VEH	0.2019	1	0.514474	1.09891	1.09891	HAL up vs VEH	0.47253	1	0.999992	1.05411	1.05411	OLZ up vs VEH	0.110674	1	0.999678	1.13302	1.13302	PCP+OLZ up vs PCP	0.058287	1	0.999419	0.863408	-1.1582	PCP down vs VEH
2014_s_at	MAP2K6	mitogen-activated protein kinase kinase 6	NM_002758	0.0749686	1	0.741184	0.345591	1	0.999954	0.945246	-1.05793	AHA down vs VEH	0.0583814	1	0.81859	0.887764	-1.12643	AOL down vs VEH	0.367074	1	0.557198	1.0553	1.0553	HAL up vs VEH	0.292725	1	0.999992	0.939029	-1.06493	OLZ down vs VEH	0.388757	1	0.999678	1.05561	1.05561	PCP+OLZ up vs PCP	0.0570185	1	0.999419	0.887039	-1.12735	PCP down vs VEH
38741_at	CYTH2	cytohesin 2	NM_004228 /// NM_017457	0.0751155	1	0.741184	0.922342	1	0.999954	1.00532	1.00532	AHA up vs VEH	0.0395547	1	0.81859	0.88753	-1.12672	AOL down vs VEH	0.391013	1	0.568854	1.04806	1.04806	HAL up vs VEH	0.789639	1	0.999992	0.98557	-1.01464	OLZ down vs VEH	0.144581	1	0.999678	1.08855	1.08855	PCP+OLZ up vs PCP	0.0811949	1	0.999419	0.904495	-1.10559	PCP down vs VEH
40380_at	ELAVL4	ELAV (embryonic lethal, abnormal vision, Drosophila)-like 4 (Hu antigen D)	NM_001144774 /// NM_001144775 /// NM_001144776 /// NM_001144777 /// NM_021952	0.0752442	1	0.741184	0.409416	1	0.999954	1.06254	1.06254	AHA up vs VEH	0.254227	1	0.81859	0.916583	-1.09101	AOL down vs VEH	0.158979	1	0.514474	1.11014	1.11014	HAL up vs VEH	0.176621	1	0.999992	1.10532	1.10532	OLZ up vs VEH	0.321743	1	0.999678	1.0799	1.0799	PCP+OLZ up vs PCP	0.269482	1	0.999419	0.919054	-1.08808	PCP down vs VEH
33463_at	XDH	xanthine dehydrogenase	NM_000379	0.0753306	1	0.741184	0.28183	1	0.999954	1.06034	1.06034	AHA up vs VEH	0.200139	1	0.81859	0.930169	-1.07507	AOL down vs VEH	0.501539	1	0.629367	1.03709	1.03709	HAL up vs VEH	0.374649	1	0.999992	0.952933	-1.04939	OLZ down vs VEH	0.0459275	1	0.999678	0.889942	-1.12367	PCP+OLZ down vs PCP	0.217112	1	0.999419	1.07225	1.07225	PCP up vs VEH
38028_at	LMO3	LIM domain only 3 (rhombotin-like 2)	NM_001001395 /// NM_018640	0.0753839	1	0.741184	0.671423	1	0.999954	1.02408	1.02408	AHA up vs VEH	0.365807	1	0.81859	0.948654	-1.05413	AOL down vs VEH	0.0193608	1	0.514474	1.14562	1.14562	HAL up vs VEH	0.448247	1	0.999992	1.04358	1.04358	OLZ up vs VEH	0.737031	1	0.999678	1.02002	1.02002	PCP+OLZ up vs PCP	0.801889	1	0.999419	0.985538	-1.01467	PCP down vs VEH
38714_at	GYPA /// GYPB	glycophorin A (MNS blood group) /// glycophorin B (MNS blood group)	NM_002099 /// NM_002100	0.075599	1	0.741184	0.584483	1	0.999954	1.03289	1.03289	AHA up vs VEH	0.379536	1	0.81859	0.947453	-1.05546	AOL down vs VEH	0.0930725	1	0.514474	1.10638	1.10638	HAL up vs VEH	0.495676	1	0.999992	0.960436	-1.04119	OLZ down vs VEH	0.163599	1	0.999678	0.915977	-1.09173	PCP+OLZ down vs PCP	0.848597	1	0.999419	1.01175	1.01175	PCP up vs VEH
37668_at	C1QBP	complement component 1, q subcomponent binding protein	NM_001212	0.0756783	1	0.741184	0.323252	1	0.999954	0.943373	-1.06003	AHA down vs VEH	0.866987	1	0.950646	0.98989	-1.01021	AOL down vs VEH	0.0735038	1	0.514474	1.11316	1.11316	HAL up vs VEH	0.995168	1	0.999992	0.999645	-1.00036	OLZ down vs VEH	0.314748	1	0.999678	1.06447	1.06447	PCP+OLZ up vs PCP	0.167845	1	0.999419	0.918675	-1.08852	PCP down vs VEH
36064_at	KCNQ2	potassium voltage-gated channel, KQT-like subfamily, member 2	NM_004518 /// NM_172106 /// NM_172107 /// NM_172108 /// NM_172109	0.0760512	1	0.741184	0.849523	1	0.999954	1.01284	1.01284	AHA up vs VEH	0.0325164	1	0.81859	0.85779	-1.16579	AOL down vs VEH	0.487117	1	0.619501	1.048	1.048	HAL up vs VEH	0.350883	1	0.999992	0.938847	-1.06514	OLZ down vs VEH	0.294462	1	0.999678	0.927951	-1.07764	PCP+OLZ down vs PCP	0.658726	1	0.999419	0.969665	-1.03128	PCP down vs VEH
274_at	ZNF148	zinc finger protein 148	NM_021964	0.0764339	1	0.741184	0.764974	1	0.999954	1.01717	1.01717	AHA up vs VEH	0.49137	1	0.824989	0.960159	-1.04149	AOL down vs VEH	0.270998	1	0.523915	1.06521	1.06521	HAL up vs VEH	0.722265	1	0.999992	1.02046	1.02046	OLZ up vs VEH	0.927177	1	0.999678	1.00549	1.00549	PCP+OLZ up vs PCP	0.114249	1	0.999419	0.909653	-1.09932	PCP down vs VEH
40195_at	H2AFX	H2A histone family, member X	NM_002105	0.0764472	1	0.741184	0.567556	1	0.999954	1.03513	1.03513	AHA up vs VEH	0.275007	1	0.81859	0.933696	-1.07101	AOL down vs VEH	0.259801	1	0.520268	1.07089	1.07089	HAL up vs VEH	0.951421	1	0.999992	0.996335	-1.00368	OLZ down vs VEH	0.224241	1	0.999678	1.08099	1.08099	PCP+OLZ up vs PCP	0.0533763	1	0.999419	0.883696	-1.13161	PCP down vs VEH
32150_at	GOLGA4	golgi autoantigen, golgin subfamily a, 4	NM_002078	0.0764796	1	0.741184	0.591305	1	0.999954	1.03247	1.03247	AHA up vs VEH	0.50061	1	0.825122	0.959332	-1.04239	AOL down vs VEH	0.0443361	1	0.514474	1.13059	1.13059	HAL up vs VEH	0.944783	1	0.999992	0.995894	-1.00412	OLZ down vs VEH	0.655769	1	0.999678	0.972471	-1.02831	PCP+OLZ down vs PCP	0.615391	1	0.999419	0.969512	-1.03145	PCP down vs VEH
1030_s_at	TOP1	topoisomerase (DNA) I	NM_003286	0.0766055	1	0.741184	0.696502	1	0.999954	1.02677	1.02677	AHA up vs VEH	0.156008	1	0.81859	0.90424	-1.1059	AOL down vs VEH	0.125321	1	0.514474	1.11112	1.11112	HAL up vs VEH	0.577066	1	0.999992	1.03854	1.03854	OLZ up vs VEH	0.54634	1	0.999678	1.04402	1.04402	PCP+OLZ up vs PCP	0.23581	1	0.999419	0.919548	-1.08749	PCP down vs VEH
36167_at	ATP6V0B	ATPase, H+ transporting, lysosomal 21kDa, V0 subunit b	NM_001039457 /// NM_004047	0.0766953	1	0.741184	0.256975	1	0.999954	1.0615	1.0615	AHA up vs VEH	0.240131	1	0.81859	0.937976	-1.06612	AOL down vs VEH	0.148738	1	0.514474	1.07944	1.07944	HAL up vs VEH	0.216532	1	0.999992	1.06735	1.06735	OLZ up vs VEH	0.627736	1	0.999678	1.02705	1.02705	PCP+OLZ up vs PCP	0.424649	1	0.999419	0.957573	-1.04431	PCP down vs VEH
32605_r_at	RAB1A	RAB1A, member RAS oncogene family	NM_004161 /// NM_015543	0.0770699	1	0.741184	0.872534	1	0.999954	1.00956	1.00956	AHA up vs VEH	0.692204	1	0.884294	0.975995	-1.0246	AOL down vs VEH	0.0105121	1	0.514474	1.17173	1.17173	HAL up vs VEH	0.650776	1	0.999992	1.02723	1.02723	OLZ up vs VEH	0.701678	1	0.999678	0.976359	-1.02421	PCP+OLZ down vs PCP	0.75054	1	0.999419	1.01972	1.01972	PCP up vs VEH
37627_g_at	IRF4	interferon regulatory factor 4	NM_002460	0.0771979	1	0.741184	0.632241	1	0.999954	1.03019	1.03019	AHA up vs VEH	0.222398	1	0.81859	0.923926	-1.08234	AOL down vs VEH	0.110994	1	0.514474	1.10583	1.10583	HAL up vs VEH	0.836762	1	0.999992	0.987291	-1.01287	OLZ down vs VEH	0.287375	1	0.999678	0.932357	-1.07255	PCP+OLZ down vs PCP	0.818892	1	0.999419	0.985385	-1.01483	PCP down vs VEH
1664_at	IGF2 /// INS-IGF2	insulin-like growth factor 2 (somatomedin A) /// INS-IGF2 readthrough transcript	NM_000612 /// NM_001007139 /// NM_001042376 /// NM_001127598 /// NR_003512	0.0773052	1	0.741184	0.810241	1	0.999954	1.01592	1.01592	AHA up vs VEH	0.218565	1	0.81859	0.918919	-1.08824	AOL down vs VEH	0.344839	1	0.552409	1.06449	1.06449	HAL up vs VEH	0.873836	1	0.999992	0.989611	-1.0105	OLZ down vs VEH	0.907021	1	0.999678	1.00812	1.00812	PCP+OLZ up vs PCP	0.0952027	1	0.999419	0.890665	-1.12276	PCP down vs VEH
37394_at	C7	complement component 7	NM_000587	0.0775546	1	0.741184	0.421636	1	0.999954	1.05051	1.05051	AHA up vs VEH	0.441837	1	0.819966	0.952396	-1.04998	AOL down vs VEH	0.296374	1	0.532627	1.06633	1.06633	HAL up vs VEH	0.570614	1	0.999992	0.965893	-1.03531	OLZ down vs VEH	0.101759	1	0.999678	0.898442	-1.11304	PCP+OLZ down vs PCP	0.872912	1	0.999419	0.989933	-1.01017	PCP down vs VEH
38939_r_at	TBR1	T-box, brain, 1	NM_006593	0.07774	1	0.741184	0.558001	1	0.999954	0.968509	-1.03252	AHA down vs VEH	0.270338	1	0.81859	0.939269	-1.06466	AOL down vs VEH	0.185808	1	0.514474	1.07568	1.07568	HAL up vs VEH	0.29224	1	0.999992	0.943817	-1.05953	OLZ down vs VEH	0.0516034	1	0.999678	1.12137	1.12137	PCP+OLZ up vs PCP	0.102552	1	0.999419	0.910457	-1.09835	PCP down vs VEH
37697_s_at	VDAC2	voltage-dependent anion channel 2	NM_003375	0.0777633	1	0.741184	0.492532	1	0.999954	0.946074	-1.057	AHA down vs VEH	0.222451	1	0.81859	0.90244	-1.10811	AOL down vs VEH	0.220351	1	0.514735	1.10482	1.10482	HAL up vs VEH	0.670803	1	0.999992	1.03486	1.03486	OLZ up vs VEH	0.148608	1	0.999678	1.13222	1.13222	PCP+OLZ up vs PCP	0.0631177	1	0.999419	0.853322	-1.17189	PCP down vs VEH
40808_at	CHGA	chromogranin A (parathyroid secretory protein 1)	NM_001275	0.0782135	1	0.741184	0.284384	1	0.999954	1.06218	1.06218	AHA up vs VEH	0.0794615	1	0.81859	0.901602	-1.10914	AOL down vs VEH	0.330259	1	0.54709	1.05632	1.05632	HAL up vs VEH	0.483182	1	0.999992	1.04013	1.04013	OLZ up vs VEH	0.171903	1	0.999678	1.08485	1.08485	PCP+OLZ up vs PCP	0.299688	1	0.999419	0.941291	-1.06237	PCP down vs VEH
37338_at	PRPSAP1	phosphoribosyl pyrophosphate synthetase-associated protein 1	NM_002766	0.0785032	1	0.741184	0.918235	1	0.999954	1.00799	1.00799	AHA up vs VEH	0.0399315	1	0.81859	0.844001	-1.18483	AOL down vs VEH	0.314306	1	0.53855	1.08175	1.08175	HAL up vs VEH	0.948894	1	0.999992	1.00498	1.00498	OLZ up vs VEH	0.726675	1	0.999678	0.971836	-1.02898	PCP+OLZ down vs PCP	0.404259	1	0.999419	0.9349	-1.06963	PCP down vs VEH
39628_at	RAB9A	RAB9A, member RAS oncogene family	NM_004251	0.0785091	1	0.741184	0.698851	1	0.999954	1.02521	1.02521	AHA up vs VEH	0.110623	1	0.81859	0.897699	-1.11396	AOL down vs VEH	0.129028	1	0.514474	1.10416	1.10416	HAL up vs VEH	0.853966	1	0.999992	0.988236	-1.0119	OLZ down vs VEH	0.137014	1	0.999678	1.10753	1.10753	PCP+OLZ up vs PCP	0.213735	1	0.999419	0.919764	-1.08724	PCP down vs VEH
1693_s_at	TIMP1	TIMP metallopeptidase inhibitor 1	NM_003254	0.0786242	1	0.741184	0.243195	1	0.999954	1.08416	1.08416	AHA up vs VEH	0.819836	1	0.930324	1.01631	1.01631	AOL up vs VEH	0.0545172	1	0.514474	1.14481	1.14481	HAL up vs VEH	0.871171	1	0.999992	1.01119	1.01119	OLZ up vs VEH	0.957288	1	0.999678	0.996138	-1.00388	PCP+OLZ down vs PCP	0.432239	1	0.999419	0.945497	-1.05764	PCP down vs VEH
40567_at	TUBA1A	tubulin, alpha 1a	NM_006009	0.0787827	1	0.741184	0.900859	1	0.999954	1.00963	1.00963	AHA up vs VEH	0.344659	1	0.81859	0.927124	-1.0786	AOL down vs VEH	0.234638	1	0.516024	1.0967	1.0967	HAL up vs VEH	0.123366	1	0.999992	1.12799	1.12799	OLZ up vs VEH	0.390253	1	0.999678	1.07244	1.07244	PCP+OLZ up vs PCP	0.205223	1	0.999419	0.902999	-1.10742	PCP down vs VEH
40470_at	OGDH	oxoglutarate (alpha-ketoglutarate) dehydrogenase (lipoamide)	NM_001003941 /// NM_002541	0.0788124	1	0.741184	0.844238	1	0.999954	0.987961	-1.01219	AHA down vs VEH	0.0483089	1	0.81859	0.878756	-1.13797	AOL down vs VEH	0.39855	1	0.57221	1.05367	1.05367	HAL up vs VEH	0.627662	1	0.999992	1.03039	1.03039	OLZ up vs VEH	0.136502	1	0.999678	1.10303	1.10303	PCP+OLZ up vs PCP	0.108205	1	0.999419	0.900933	-1.10996	PCP down vs VEH
34609_g_at	GNB2L1	guanine nucleotide binding protein (G protein), beta polypeptide 2-like 1	NM_006098	0.0788136	1	0.741184	0.204768	1	0.999954	1.08106	1.08106	AHA up vs VEH	0.943648	1	0.978071	1.00446	1.00446	AOL up vs VEH	0.0206201	1	0.514474	1.15711	1.15711	HAL up vs VEH	0.351954	1	0.999992	1.05858	1.05858	OLZ up vs VEH	0.0330605	1	0.999678	1.15105	1.15105	PCP+OLZ up vs PCP	0.456221	1	0.999419	0.953992	-1.04823	PCP down vs VEH
39521_at	SLC12A4	solute carrier family 12 (potassium/chloride transporters), member 4	NM_001145961 /// NM_001145962 /// NM_001145963 /// NM_001145964 /// NM_005072	0.0788793	1	0.741184	0.326839	1	0.999954	1.05442	1.05442	AHA up vs VEH	0.980269	1	0.993543	0.998627	-1.00138	AOL down vs VEH	0.0120378	1	0.514474	1.15109	1.15109	HAL up vs VEH	0.176674	1	0.999992	1.07621	1.07621	OLZ up vs VEH	0.148382	1	0.999678	1.0864	1.0864	PCP+OLZ up vs PCP	0.591984	1	0.999419	0.970573	-1.03032	PCP down vs VEH
1321_s_at	EMP1	epithelial membrane protein 1	NM_001423	0.079048	1	0.741184	0.297125	1	0.999954	1.06784	1.06784	AHA up vs VEH	0.507244	1	0.827359	0.957906	-1.04394	AOL down vs VEH	0.0265088	1	0.514474	1.15412	1.15412	HAL up vs VEH	0.316979	1	0.999992	1.06499	1.06499	OLZ up vs VEH	0.27673	1	0.999678	1.07481	1.07481	PCP+OLZ up vs PCP	0.488378	1	0.999419	0.955999	-1.04603	PCP down vs VEH
980_at	NPC1	Niemann-Pick disease, type C1	NM_000271	0.0791135	1	0.741184	0.543354	1	0.999954	1.04345	1.04345	AHA up vs VEH	0.0542919	1	0.81859	0.867195	-1.15314	AOL down vs VEH	0.21841	1	0.514474	1.09067	1.09067	HAL up vs VEH	0.616858	1	0.999992	1.0356	1.0356	OLZ up vs VEH	0.638654	1	0.999678	1.03517	1.03517	PCP+OLZ up vs PCP	0.414024	1	0.999419	0.942401	-1.06112	PCP down vs VEH
36484_at	GALNT3	UDP-N-acetyl-alpha-D-galactosamine:polypeptide N-acetylgalactosaminyltransferase	NM_004482	0.0791147	1	0.741184	0.419214	1	0.999954	1.04828	1.04828	AHA up vs VEH	0.329343	1	0.81859	0.942687	-1.0608	AOL down vs VEH	0.0457134	1	0.514474	1.12667	1.12667	HAL up vs VEH	0.977981	1	0.999992	1.00161	1.00161	OLZ up vs VEH	0.273485	1	0.999678	0.93469	-1.06987	PCP+OLZ down vs PCP	0.705645	1	0.999419	1.02302	1.02302	PCP up vs VEH
1904_at	MYCBP	c-myc binding protein	NM_012333	0.079146	1	0.741184	0.98343	1	0.999954	0.998654	-1.00135	AHA down vs VEH	0.130582	1	0.81859	0.902119	-1.1085	AOL down vs VEH	0.10819	1	0.514474	1.11183	1.11183	HAL up vs VEH	0.472935	1	0.999992	0.954363	-1.04782	OLZ down vs VEH	0.458451	1	0.999678	0.950456	-1.05213	PCP+OLZ down vs PCP	0.790325	1	0.999419	0.982288	-1.01803	PCP down vs VEH
1914_at	CCNA1	cyclin A1	NM_001111045 /// NM_001111046 /// NM_001111047 /// NM_003914	0.079263	1	0.741184	0.760711	1	0.999954	1.02183	1.02183	AHA up vs VEH	0.298021	1	0.81859	0.926018	-1.07989	AOL down vs VEH	0.0554436	1	0.514474	1.14928	1.14928	HAL up vs VEH	0.592256	1	0.999992	0.962683	-1.03876	OLZ down vs VEH	0.912434	1	0.999678	0.991827	-1.00824	PCP+OLZ down vs PCP	0.540388	1	0.999419	0.955945	-1.04609	PCP down vs VEH
32831_at	TIMM17A	translocase of inner mitochondrial membrane 17 homolog A (yeast)	NM_006335	0.0794258	1	0.741184	0.896931	1	0.999954	0.990179	-1.00992	AHA down vs VEH	0.17443	1	0.81859	0.897295	-1.11446	AOL down vs VEH	0.182089	1	0.514474	1.10835	1.10835	HAL up vs VEH	0.465188	1	0.999992	1.05743	1.05743	OLZ up vs VEH	0.879025	1	0.999678	0.987864	-1.01228	PCP+OLZ down vs PCP	0.319862	1	0.999419	0.92403	-1.08222	PCP down vs VEH
1000_at	MAPK3	mitogen-activated protein kinase 3	NM_001040056 /// NM_001109891 /// NM_002746	0.0794905	1	0.741184	0.780616	1	0.999954	1.019	1.019	AHA up vs VEH	0.124426	1	0.81859	0.896654	-1.11526	AOL down vs VEH	0.169263	1	0.514474	1.09859	1.09859	HAL up vs VEH	0.494299	1	0.999992	1.0474	1.0474	OLZ up vs VEH	0.891328	1	0.999678	1.00977	1.00977	PCP+OLZ up vs PCP	0.32525	1	0.999419	0.933074	-1.07173	PCP down vs VEH
1561_at	DUSP8	dual specificity phosphatase 8	NM_004420	0.0797256	1	0.741184	0.774417	1	0.999954	1.01992	1.01992	AHA up vs VEH	0.111016	1	0.81859	0.89104	-1.12228	AOL down vs VEH	0.527293	1	0.646469	1.04457	1.04457	HAL up vs VEH	0.991319	1	0.999992	1.00075	1.00075	OLZ up vs VEH	0.147524	1	0.999678	1.11224	1.11224	PCP+OLZ up vs PCP	0.0321454	1	0.999419	0.854323	-1.17052	PCP down vs VEH
33348_at	TCF12	transcription factor 12	NM_003205 /// NM_207036 /// NM_207037 /// NM_207038 /// NM_207040	0.0798345	1	0.741184	0.807695	1	0.999954	0.981682	-1.01866	AHA down vs VEH	0.123182	1	0.81859	0.884233	-1.13092	AOL down vs VEH	0.190608	1	0.514474	1.10574	1.10574	HAL up vs VEH	0.692609	1	0.999992	1.0305	1.0305	OLZ up vs VEH	0.973006	1	0.999678	1.00271	1.00271	PCP+OLZ up vs PCP	0.244811	1	0.999419	0.911837	-1.09669	PCP down vs VEH
237_s_at	PPP2CA	protein phosphatase 2 (formerly 2A), catalytic subunit, alpha isoform	NM_002715	0.0798477	1	0.741184	0.758451	1	0.999954	0.978084	-1.02241	AHA down vs VEH	0.0394834	1	0.81859	0.853984	-1.17098	AOL down vs VEH	0.415789	1	0.579867	1.06063	1.06063	HAL up vs VEH	0.777793	1	0.999992	1.02054	1.02054	OLZ up vs VEH	0.878096	1	0.999678	1.0117	1.0117	PCP+OLZ up vs PCP	0.189475	1	0.999419	0.905742	-1.10407	PCP down vs VEH
41701_at	C6	complement component 6	NM_000065 /// NM_001115131	0.0799262	1	0.741184	0.883009	1	0.999954	1.01069	1.01069	AHA up vs VEH	0.0234738	1	0.81859	0.839242	-1.19155	AOL down vs VEH	0.497466	1	0.626526	1.05039	1.05039	HAL up vs VEH	0.388025	1	0.999992	0.939263	-1.06467	OLZ down vs VEH	0.259163	1	0.999678	0.917097	-1.0904	PCP+OLZ down vs PCP	0.973518	1	0.999419	0.997519	-1.00249	PCP down vs VEH
39159_at	SH3GL1	SH3-domain GRB2-like 1	NM_003025	0.0799341	1	0.741184	0.680184	1	0.999954	1.02806	1.02806	AHA up vs VEH	0.0850672	1	0.81859	0.885273	-1.1296	AOL down vs VEH	0.441051	1	0.593372	1.05323	1.05323	HAL up vs VEH	0.839054	1	0.999992	0.986469	-1.01372	OLZ down vs VEH	0.158785	1	0.999678	1.10607	1.10607	PCP+OLZ up vs PCP	0.0500152	1	0.999419	0.869647	-1.14989	PCP down vs VEH
36179_at	MAPKAPK2	mitogen-activated protein kinase-activated protein kinase 2	NM_004759 /// NM_032960	0.0800247	1	0.741184	0.925863	1	0.999954	0.994912	-1.00511	AHA down vs VEH	0.0675593	1	0.81859	0.89941	-1.11184	AOL down vs VEH	0.189394	1	0.514474	1.07549	1.07549	HAL up vs VEH	0.836206	1	0.999992	1.0114	1.0114	OLZ up vs VEH	0.557343	1	0.999678	1.03453	1.03453	PCP+OLZ up vs PCP	0.215289	1	0.999419	0.931387	-1.07367	PCP down vs VEH
40671_g_at	KYNU	kynureninase (L-kynurenine hydrolase)	NM_001032998 /// NM_003937	0.0800554	1	0.741184	0.716188	1	0.999954	0.983222	-1.01706	AHA down vs VEH	0.511997	1	0.827594	0.968858	-1.03214	AOL down vs VEH	0.439338	1	0.593063	1.03676	1.03676	HAL up vs VEH	0.0193809	1	0.999992	0.893329	-1.11941	OLZ down vs VEH	0.398866	1	0.999678	0.95935	-1.04237	PCP+OLZ down vs PCP	0.94639	1	0.999419	0.996767	-1.00324	PCP down vs VEH
1426_at	SLA	Src-like-adaptor	NM_001045556 /// NM_001045557 /// NM_006748	0.080084	1	0.741184	0.11898	1	0.999954	1.09642	1.09642	AHA up vs VEH	0.979426	1	0.993479	1.00155	1.00155	AOL up vs VEH	0.012589	1	0.514474	1.16319	1.16319	HAL up vs VEH	0.758727	1	0.999992	1.01801	1.01801	OLZ up vs VEH	0.550531	1	0.999678	0.964064	-1.03728	PCP+OLZ down vs PCP	0.611643	1	0.999419	1.03107	1.03107	PCP up vs VEH
2053_at	CDH2	cadherin 2, type 1, N-cadherin (neuronal)	NM_001792	0.0800989	1	0.741184	0.269407	1	0.999954	1.06859	1.06859	AHA up vs VEH	0.694847	1	0.885376	0.976085	-1.0245	AOL down vs VEH	0.00922195	1	0.514474	1.17633	1.17633	HAL up vs VEH	0.256357	1	0.999992	1.07059	1.07059	OLZ up vs VEH	0.745754	1	0.999678	0.979852	-1.02056	PCP+OLZ down vs PCP	0.608754	1	0.999419	1.03215	1.03215	PCP up vs VEH
33901_at	SLC29A1	solute carrier family 29 (nucleoside transporters), member 1	NM_001078174 /// NM_001078175 /// NM_001078176 /// NM_001078177 /// NM_004955	0.0801597	1	0.741184	0.819421	1	0.999954	1.01501	1.01501	AHA up vs VEH	0.283009	1	0.81859	0.929567	-1.07577	AOL down vs VEH	0.2688	1	0.523653	1.07546	1.07546	HAL up vs VEH	0.758404	1	0.999992	1.02029	1.02029	OLZ up vs VEH	0.762615	1	0.999678	1.02098	1.02098	PCP+OLZ up vs PCP	0.105619	1	0.999419	0.89467	-1.11773	PCP down vs VEH
38892_at	KIAA0240	KIAA0240	NM_015349	0.0801698	1	0.741184	0.89509	1	0.999954	0.990523	-1.00957	AHA down vs VEH	0.107972	1	0.81859	0.884998	-1.12995	AOL down vs VEH	0.123438	1	0.514474	1.11965	1.11965	HAL up vs VEH	0.779568	1	0.999992	1.02043	1.02043	OLZ up vs VEH	0.539378	1	0.999678	0.954302	-1.04789	PCP+OLZ down vs PCP	0.669537	1	0.999419	0.968548	-1.03247	PCP down vs VEH
36125_s_at	RALY	RNA binding protein, autoantigenic (hnRNP-associated with lethal yellow homolog	NM_007367 /// NM_016732	0.080208	1	0.741184	0.887618	1	0.999954	1.00756	1.00756	AHA up vs VEH	0.103565	1	0.81859	0.91274	-1.0956	AOL down vs VEH	0.314284	1	0.53855	1.05544	1.05544	HAL up vs VEH	0.246728	1	0.999992	1.06423	1.06423	OLZ up vs VEH	0.113176	1	0.999678	1.09454	1.09454	PCP+OLZ up vs PCP	0.211026	1	0.999419	0.932652	-1.07221	PCP down vs VEH
737_at	POM121L1P	POM121 membrane glycoprotein-like 1 (rat) pseudogene	NR_024591	0.080308	1	0.741184	0.353484	1	0.999954	1.05498	1.05498	AHA up vs VEH	0.21338	1	0.81859	0.928115	-1.07745	AOL down vs VEH	0.188417	1	0.514474	1.0793	1.0793	HAL up vs VEH	0.569611	1	0.999992	1.03322	1.03322	OLZ up vs VEH	0.121273	1	0.999678	1.09974	1.09974	PCP+OLZ up vs PCP	0.132302	1	0.999419	0.913228	-1.09502	PCP down vs VEH
934_at	GPLD1	glycosylphosphatidylinositol specific phospholipase D1	NM_001503 /// NM_177483	0.0803622	1	0.741184	0.640803	1	0.999954	1.03035	1.03035	AHA up vs VEH	0.234124	1	0.81859	0.923575	-1.08275	AOL down vs VEH	0.0604684	1	0.514474	1.13087	1.13087	HAL up vs VEH	0.662815	1	0.999992	0.972454	-1.02833	OLZ down vs VEH	0.34447	1	0.999678	0.937948	-1.06616	PCP+OLZ down vs PCP	0.827146	1	0.999419	1.01458	1.01458	PCP up vs VEH
31509_at	RPL13	ribosomal protein L13	NM_000977 /// NM_033251	0.0804484	1	0.741184	0.635853	1	0.999954	1.02565	1.02565	AHA up vs VEH	0.129645	1	0.81859	0.918479	-1.08876	AOL down vs VEH	0.212558	1	0.514474	1.06959	1.06959	HAL up vs VEH	0.951639	1	0.999992	1.00324	1.00324	OLZ up vs VEH	0.766969	1	0.999678	1.01681	1.01681	PCP+OLZ up vs PCP	0.188981	1	0.999419	0.929129	-1.07628	PCP down vs VEH
422_s_at	MAX	MYC associated factor X	NM_002382 /// NM_145112 /// NM_145113 /// NM_145114 /// NM_145116 /// NM_197957	0.0805129	1	0.741184	0.439056	1	0.999954	0.951254	-1.05124	AHA down vs VEH	0.303832	1	0.81859	0.933405	-1.07135	AOL down vs VEH	0.841278	1	0.876525	1.01297	1.01297	HAL up vs VEH	0.162968	1	0.999992	0.91309	-1.09518	OLZ down vs VEH	0.0529897	1	0.999678	1.14383	1.14383	PCP+OLZ up vs PCP	0.00574606	1	0.999419	0.823855	-1.21381	PCP down vs VEH
40867_at	PPP2R1A	protein phosphatase 2 (formerly 2A), regulatory subunit A, alpha isoform	NM_014225	0.0807021	1	0.741184	0.761235	1	0.999954	1.01782	1.01782	AHA up vs VEH	0.280055	1	0.81859	0.936648	-1.06764	AOL down vs VEH	0.356729	1	0.553416	1.05534	1.05534	HAL up vs VEH	0.122563	1	0.999992	1.09545	1.09545	OLZ up vs VEH	0.0928881	1	0.999678	1.11045	1.11045	PCP+OLZ up vs PCP	0.143557	1	0.999419	0.91457	-1.09341	PCP down vs VEH
171_at	VBP1	von Hippel-Lindau binding protein 1	NM_003372	0.080794	1	0.741184	0.21683	1	0.999954	1.09001	1.09001	AHA up vs VEH	0.686552	1	0.881752	0.971542	-1.02929	AOL down vs VEH	0.0120341	1	0.514474	1.19842	1.19842	HAL up vs VEH	0.364634	1	0.999992	1.06499	1.06499	OLZ up vs VEH	0.611167	1	0.999678	0.963638	-1.03773	PCP+OLZ down vs PCP	0.638286	1	0.999419	1.03426	1.03426	PCP up vs VEH
922_at	PPP2R1A	protein phosphatase 2 (formerly 2A), regulatory subunit A, alpha isoform	NM_014225	0.08088	1	0.741184	0.396248	1	0.999954	1.04627	1.04627	AHA up vs VEH	0.74929	1	0.905769	0.982596	-1.01771	AOL down vs VEH	0.0980038	1	0.514474	1.09355	1.09355	HAL up vs VEH	0.171951	1	0.999992	1.07616	1.07616	OLZ up vs VEH	0.0577456	1	0.999678	1.11473	1.11473	PCP+OLZ up vs PCP	0.15447	1	0.999419	0.923733	-1.08256	PCP down vs VEH
38516_at	SCN1B	sodium channel, voltage-gated, type I, beta	NM_001037 /// NM_199037	0.0808864	1	0.741184	0.861217	1	0.999954	1.00757	1.00757	AHA up vs VEH	0.17195	1	0.81859	0.940149	-1.06366	AOL down vs VEH	0.156284	1	0.514474	1.06393	1.06393	HAL up vs VEH	0.769834	1	0.999992	0.987453	-1.01271	OLZ down vs VEH	0.0747682	1	0.999678	1.08617	1.08617	PCP+OLZ up vs PCP	0.0948813	1	0.999419	0.9268	-1.07898	PCP down vs VEH
38445_at	ARHGEF1	Rho guanine nucleotide exchange factor (GEF) 1	NM_004706 /// NM_198977 /// NM_199002	0.0808949	1	0.741184	0.730921	1	0.999954	1.01665	1.01665	AHA up vs VEH	0.314856	1	0.81859	0.951026	-1.0515	AOL down vs VEH	0.126365	1	0.514474	1.07732	1.07732	HAL up vs VEH	0.764359	1	0.999992	1.01449	1.01449	OLZ up vs VEH	0.0388509	1	0.999678	1.11333	1.11333	PCP+OLZ up vs PCP	0.0915176	1	0.999419	0.918103	-1.0892	PCP down vs VEH
842_at	ZMYND8	zinc finger, MYND-type containing 8	NM_012408 /// NM_183047 /// NM_183048	0.0809531	1	0.741184	0.553174	1	0.999954	1.04322	1.04322	AHA up vs VEH	0.186571	1	0.81859	0.906278	-1.10341	AOL down vs VEH	0.0612259	1	0.514474	1.14615	1.14615	HAL up vs VEH	0.289789	1	0.999992	1.07887	1.07887	OLZ up vs VEH	0.305946	1	0.999678	1.08033	1.08033	PCP+OLZ up vs PCP	0.569631	1	0.999419	0.958859	-1.04291	PCP down vs VEH
36051_s_at	ADD2	adducin 2 (beta)	NM_001617 /// NM_017482 /// NM_017483 /// NM_017484 /// NM_017488	0.0811797	1	0.741184	0.9103	1	0.999954	1.00712	1.00712	AHA up vs VEH	0.0660024	1	0.81859	0.884684	-1.13035	AOL down vs VEH	0.238146	1	0.516024	1.07787	1.07787	HAL up vs VEH	0.563142	1	0.999992	1.03717	1.03717	OLZ up vs VEH	0.740601	1	0.999678	0.978273	-1.02221	PCP+OLZ down vs PCP	0.502917	1	0.999419	0.957119	-1.0448	PCP down vs VEH
39242_at	SYT5	synaptotagmin V	NM_003180	0.0811849	1	0.741184	0.912265	1	0.999954	0.994307	-1.00573	AHA down vs VEH	0.0939487	1	0.81859	0.912576	-1.0958	AOL down vs VEH	0.0986279	1	0.514474	1.09105	1.09105	HAL up vs VEH	0.979029	1	0.999992	0.998639	-1.00136	OLZ down vs VEH	0.2973	1	0.999678	1.05894	1.05894	PCP+OLZ up vs PCP	0.330598	1	0.999419	0.948816	-1.05395	PCP down vs VEH
1058_at	WASF3	WAS protein family, member 3	NM_006646	0.0811912	1	0.741184	0.886568	1	0.999954	1.00979	1.00979	AHA up vs VEH	0.30902	1	0.81859	0.930185	-1.07505	AOL down vs VEH	0.0689027	1	0.514474	1.13543	1.13543	HAL up vs VEH	0.949051	1	0.999992	0.995646	-1.00437	OLZ down vs VEH	0.468518	1	0.999678	1.05369	1.05369	PCP+OLZ up vs PCP	0.204351	1	0.999419	0.913248	-1.09499	PCP down vs VEH
32557_at	U2AF2	U2 small nuclear RNA auxiliary factor 2	NM_001012478 /// NM_007279	0.0812831	1	0.741184	0.615827	1	0.999954	1.03113	1.03113	AHA up vs VEH	0.396655	1	0.819966	0.947672	-1.05522	AOL down vs VEH	0.0332055	1	0.514474	1.1433	1.1433	HAL up vs VEH	0.682203	1	0.999992	1.02532	1.02532	OLZ up vs VEH	0.414112	1	0.999678	1.05409	1.05409	PCP+OLZ up vs PCP	0.376187	1	0.999419	0.945349	-1.05781	PCP down vs VEH
32780_at	DST	dystonin	NM_001144769 /// NM_001144770 /// NM_001144771 /// NM_001723 /// NM_015548 /// N	0.0813148	1	0.741184	0.458392	1	0.999954	0.947146	-1.0558	AHA down vs VEH	0.0991732	1	0.81859	0.880949	-1.13514	AOL down vs VEH	0.285344	1	0.5296	1.08172	1.08172	HAL up vs VEH	0.859802	1	0.999992	0.987193	-1.01297	OLZ down vs VEH	0.172172	1	0.999678	1.11204	1.11204	PCP+OLZ up vs PCP	0.0542193	1	0.999419	0.861444	-1.16084	PCP down vs VEH
38178_at	HSD17B2	hydroxysteroid (17-beta) dehydrogenase 2	NM_002153	0.0813155	1	0.741184	0.447637	1	0.999954	1.05313	1.05313	AHA up vs VEH	0.0933847	1	0.81859	0.886805	-1.12764	AOL down vs VEH	0.287261	1	0.53051	1.07554	1.07554	HAL up vs VEH	0.624696	1	0.999992	0.96727	-1.03384	OLZ down vs VEH	0.891947	1	0.999678	0.990333	-1.00976	PCP+OLZ down vs PCP	0.330536	1	0.999419	0.93344	-1.07131	PCP down vs VEH
34352_at	PCBD1	pterin-4 alpha-carbinolamine dehydratase/dimerization cofactor of hepatocyte nuc	NM_000281	0.0813301	1	0.741184	0.284362	1	0.999954	1.0621	1.0621	AHA up vs VEH	0.907463	1	0.96421	0.993306	-1.00674	AOL down vs VEH	0.0381089	1	0.514474	1.1266	1.1266	HAL up vs VEH	0.479791	1	0.999992	0.961178	-1.04039	OLZ down vs VEH	0.425306	1	0.999678	0.954014	-1.0482	PCP+OLZ down vs PCP	0.780904	1	0.999419	1.01623	1.01623	PCP up vs VEH
1040_s_at	ABI2	abl-interactor 2	NM_005759	0.081497	1	0.741184	0.629351	1	0.999954	0.973443	-1.02728	AHA down vs VEH	0.043431	1	0.81859	0.887304	-1.12701	AOL down vs VEH	0.296378	1	0.532627	1.06032	1.06032	HAL up vs VEH	0.281046	1	0.999992	0.941304	-1.06236	OLZ down vs VEH	0.278191	1	0.999678	1.06617	1.06617	PCP+OLZ up vs PCP	0.14571	1	0.999419	0.918422	-1.08882	PCP down vs VEH
1351_at	EPHB4	EPH receptor B4	NM_004444	0.0815001	1	0.741184	0.842253	1	0.999954	1.01193	1.01193	AHA up vs VEH	0.202924	1	0.81859	0.923746	-1.08255	AOL down vs VEH	0.058914	1	0.514474	1.12213	1.12213	HAL up vs VEH	0.671043	1	0.999992	1.02565	1.02565	OLZ up vs VEH	0.664216	1	0.999678	1.02763	1.02763	PCP+OLZ up vs PCP	0.409838	1	0.999419	0.950205	-1.0524	PCP down vs VEH
37722_s_at	DHPS	deoxyhypusine synthase	NM_001930 /// NM_013406 /// NM_013407	0.0815216	1	0.741184	0.903933	1	0.999954	0.992076	-1.00799	AHA down vs VEH	0.309681	1	0.81859	0.93263	-1.07224	AOL down vs VEH	0.22571	1	0.51598	1.08397	1.08397	HAL up vs VEH	0.823171	1	0.999992	1.01484	1.01484	OLZ up vs VEH	0.146531	1	0.999678	1.10758	1.10758	PCP+OLZ up vs PCP	0.0420331	1	0.999419	0.86702	-1.15338	PCP down vs VEH
40919_at	SSTR2	somatostatin receptor 2	NM_001050	0.0815727	1	0.741184	0.147047	1	0.999954	1.08939	1.08939	AHA up vs VEH	0.26975	1	0.81859	0.935179	-1.06931	AOL down vs VEH	0.123319	1	0.514474	1.09544	1.09544	HAL up vs VEH	0.597443	1	0.999992	1.03128	1.03128	OLZ up vs VEH	0.252212	1	0.999678	1.07337	1.07337	PCP+OLZ up vs PCP	0.317178	1	0.999419	0.941086	-1.0626	PCP down vs VEH
719_g_at	HTRA1	HtrA serine peptidase 1	NM_002775	0.0819318	1	0.741184	0.69082	1	0.999954	1.02543	1.02543	AHA up vs VEH	0.253722	1	0.81859	0.927625	-1.07802	AOL down vs VEH	0.249945	1	0.517829	1.07595	1.07595	HAL up vs VEH	0.538685	1	0.999992	1.03964	1.03964	OLZ up vs VEH	0.738773	1	0.999678	1.02241	1.02241	PCP+OLZ up vs PCP	0.146653	1	0.999419	0.908315	-1.10094	PCP down vs VEH
36994_at	ATP6V0C	ATPase, H+ transporting, lysosomal 16kDa, V0 subunit c	NM_001694	0.0820128	1	0.741184	0.202773	1	0.999954	1.06363	1.06363	AHA up vs VEH	0.579117	1	0.846818	0.972827	-1.02793	AOL down vs VEH	0.053958	1	0.514474	1.09928	1.09928	HAL up vs VEH	0.113377	1	0.999992	1.08018	1.08018	OLZ up vs VEH	0.0630326	1	0.999678	1.10072	1.10072	PCP+OLZ up vs PCP	0.530398	1	0.999419	0.969268	-1.03171	PCP down vs VEH
37135_f_at	GRIN1	glutamate receptor, ionotropic, N-methyl D-aspartate 1	NM_000832 /// NM_007327 /// NM_021569	0.0820539	1	0.741184	0.579708	1	0.999954	1.02516	1.02516	AHA up vs VEH	0.034537	1	0.81859	0.904005	-1.10619	AOL down vs VEH	0.787604	1	0.835262	1.01215	1.01215	HAL up vs VEH	0.87574	1	0.999992	0.99302	-1.00703	OLZ down vs VEH	0.0561345	1	0.999678	1.09668	1.09668	PCP+OLZ up vs PCP	0.126594	1	0.999419	0.930553	-1.07463	PCP down vs VEH
409_at	YWHAQ	tyrosine 3-monooxygenase/tryptophan 5-monooxygenase activation protein, theta po	NM_006826	0.082256	1	0.741184	0.652296	1	0.999954	0.965834	-1.03537	AHA down vs VEH	0.649834	1	0.868208	0.96441	-1.0369	AOL down vs VEH	0.24201	1	0.516024	1.09524	1.09524	HAL up vs VEH	0.421229	1	0.999992	1.06421	1.06421	OLZ up vs VEH	0.407335	1	0.999678	1.06986	1.06986	PCP+OLZ up vs PCP	0.0765627	1	0.999419	0.865602	-1.15527	PCP down vs VEH
36967_g_at	ANK3	ankyrin 3, node of Ranvier (ankyrin G)	NM_001149 /// NM_020987	0.0822628	1	0.741184	0.589936	1	0.999954	0.963282	-1.03812	AHA down vs VEH	0.133505	1	0.81859	0.896574	-1.11536	AOL down vs VEH	0.133535	1	0.514474	1.11128	1.11128	HAL up vs VEH	0.446381	1	0.999992	0.94842	-1.05439	OLZ down vs VEH	0.540238	1	0.999678	0.956204	-1.0458	PCP+OLZ down vs PCP	0.55036	1	0.999419	0.957953	-1.04389	PCP down vs VEH
38679_g_at	SNRPE	small nuclear ribonucleoprotein polypeptide E	NM_003094	0.0823706	1	0.741184	0.713966	1	0.999954	0.972697	-1.02807	AHA down vs VEH	0.353258	1	0.81859	0.929706	-1.07561	AOL down vs VEH	0.392699	1	0.569222	1.06696	1.06696	HAL up vs VEH	0.627791	1	0.999992	1.03732	1.03732	OLZ up vs VEH	0.525566	1	0.999678	1.05187	1.05187	PCP+OLZ up vs PCP	0.0527559	1	0.999419	0.856212	-1.16794	PCP down vs VEH
950_at	SEC62	SEC62 homolog (S. cerevisiae)	NM_003262	0.0824032	1	0.741184	0.572936	1	0.999954	0.965148	-1.03611	AHA down vs VEH	0.0464363	1	0.81859	0.875587	-1.14209	AOL down vs VEH	0.202748	1	0.514474	1.08421	1.08421	HAL up vs VEH	0.449105	1	0.999992	0.95341	-1.04887	OLZ down vs VEH	0.517722	1	0.999678	1.04382	1.04382	PCP+OLZ up vs PCP	0.261804	1	0.999419	0.929045	-1.07637	PCP down vs VEH
38088_r_at	S100A4	S100 calcium binding protein A4	NM_002961 /// NM_019554	0.0825934	1	0.741184	0.361661	1	0.999954	1.05533	1.05533	AHA up vs VEH	0.830131	1	0.933913	0.987049	-1.01312	AOL down vs VEH	0.0179097	1	0.514474	1.15529	1.15529	HAL up vs VEH	0.777341	1	0.999992	1.01675	1.01675	OLZ up vs VEH	0.736684	1	0.999678	1.02102	1.02102	PCP+OLZ up vs PCP	0.595485	1	0.999419	0.968171	-1.03288	PCP down vs VEH
251_at	CAMK1	calcium/calmodulin-dependent protein kinase I	NM_003656	0.0826178	1	0.741184	0.194462	1	0.999954	1.08206	1.08206	AHA up vs VEH	0.387695	1	0.819966	0.94745	-1.05547	AOL down vs VEH	0.103479	1	0.514474	1.10474	1.10474	HAL up vs VEH	0.327299	1	0.999992	1.06104	1.06104	OLZ up vs VEH	0.506143	1	0.999678	1.0431	1.0431	PCP+OLZ up vs PCP	0.350193	1	0.999419	0.943182	-1.06024	PCP down vs VEH
38207_at	LOC100292444 /// NEAT1	similar to hCG2018832 /// nuclear paraspeckle assembly transcript 1 (non-protein	NR_002802 /// NR_028272 /// XM_002344589	0.0828516	1	0.741184	0.285272	1	0.999954	1.06797	1.06797	AHA up vs VEH	0.738634	1	0.902616	0.979123	-1.02132	AOL down vs VEH	0.16442	1	0.514474	1.08982	1.08982	HAL up vs VEH	0.72015	1	0.999992	0.978339	-1.02214	OLZ down vs VEH	0.0402594	1	0.999678	0.873137	-1.1453	PCP+OLZ down vs PCP	0.480662	1	0.999419	1.04578	1.04578	PCP up vs VEH
41483_s_at	JUND	jun D proto-oncogene	NM_005354	0.0830996	1	0.741184	0.875476	1	0.999954	1.01132	1.01132	AHA up vs VEH	0.0481462	1	0.81859	0.860092	-1.16267	AOL down vs VEH	0.816165	1	0.856421	1.01684	1.01684	HAL up vs VEH	0.356617	1	0.999992	1.06884	1.06884	OLZ up vs VEH	0.539386	1	0.999678	1.04762	1.04762	PCP+OLZ up vs PCP	0.158554	1	0.999419	0.899175	-1.11213	PCP down vs VEH
33667_at	PPIA	peptidylprolyl isomerase A (cyclophilin A)	NM_021130	0.0831174	1	0.741184	0.154576	1	0.999954	1.0756	1.0756	AHA up vs VEH	0.860966	1	0.948149	0.990888	-1.0092	AOL down vs VEH	0.012661	1	0.514474	1.14033	1.14033	HAL up vs VEH	0.036476	1	0.999992	1.11493	1.11493	OLZ up vs VEH	0.333751	1	0.999678	1.05308	1.05308	PCP+OLZ up vs PCP	0.515188	1	0.999419	1.03473	1.03473	PCP up vs VEH
40845_at	ILF3	interleukin enhancer binding factor 3, 90kDa	NM_001137673 /// NM_004516 /// NM_012218 /// NM_017620 /// NM_153464	0.0831728	1	0.741184	0.804123	1	0.999954	0.983961	-1.0163	AHA down vs VEH	0.100756	1	0.81859	0.893449	-1.11926	AOL down vs VEH	0.654884	1	0.73373	1.0296	1.0296	HAL up vs VEH	0.242097	1	0.999992	0.925954	-1.07997	OLZ down vs VEH	0.0165848	1	0.999678	1.18632	1.18632	PCP+OLZ up vs PCP	0.0423241	1	0.999419	0.868587	-1.15129	PCP down vs VEH
41214_at	RPS4Y1	ribosomal protein S4, Y-linked 1	NM_001008	0.0833581	1	0.741184	0.482772	1	0.999954	1.03825	1.03825	AHA up vs VEH	0.310978	1	0.81859	0.945287	-1.05788	AOL down vs VEH	0.0377953	1	0.514474	1.12074	1.12074	HAL up vs VEH	0.801548	1	0.999992	0.986684	-1.0135	OLZ down vs VEH	0.501269	1	0.999678	1.03859	1.03859	PCP+OLZ up vs PCP	0.550996	1	0.999419	0.967535	-1.03355	PCP down vs VEH
32464_at	DEFB4	defensin, beta 4	NM_004942	0.0833795	1	0.741184	0.552509	1	0.999954	1.03122	1.03122	AHA up vs VEH	0.245264	1	0.81859	0.939285	-1.06464	AOL down vs VEH	0.0366238	1	0.514474	1.11754	1.11754	HAL up vs VEH	0.781014	1	0.999992	0.98574	-1.01447	OLZ down vs VEH	0.94573	1	0.999678	0.996306	-1.00371	PCP+OLZ down vs PCP	0.960275	1	0.999419	0.997339	-1.00267	PCP down vs VEH
34993_at	SGCD	sarcoglycan, delta (35kDa dystrophin-associated glycoprotein)	NM_000337 /// NM_001128209 /// NM_172244	0.0835465	1	0.741184	0.170798	1	0.999954	1.08441	1.08441	AHA up vs VEH	0.436497	1	0.819966	0.953872	-1.04836	AOL down vs VEH	0.140363	1	0.514474	1.09134	1.09134	HAL up vs VEH	0.879406	1	0.999992	0.991173	-1.00891	OLZ down vs VEH	0.0527007	1	0.999678	0.884959	-1.13	PCP+OLZ down vs PCP	0.196485	1	0.999419	1.08225	1.08225	PCP up vs VEH
2000_at	ATM	ataxia telangiectasia mutated	NM_000051 /// NM_138292	0.0836944	1	0.741184	0.518696	1	0.999954	1.04138	1.04138	AHA up vs VEH	0.676703	1	0.879108	0.973305	-1.02743	AOL down vs VEH	0.0216901	1	0.514474	1.1607	1.1607	HAL up vs VEH	0.898761	1	0.999992	1.008	1.008	OLZ up vs VEH	0.282968	1	0.999678	0.931121	-1.07397	PCP+OLZ down vs PCP	0.653278	1	0.999419	1.02962	1.02962	PCP up vs VEH
1826_at	RHOB	ras homolog gene family, member B	NM_004040	0.0837472	1	0.741184	0.624093	1	0.999954	0.970631	-1.03026	AHA down vs VEH	0.318544	1	0.81859	0.938861	-1.06512	AOL down vs VEH	0.987325	1	0.98988	1.00097	1.00097	HAL up vs VEH	0.125759	1	0.999992	0.909873	-1.09905	OLZ down vs VEH	0.0202302	1	0.999678	1.16644	1.16644	PCP+OLZ up vs PCP	0.00680886	1	0.999419	0.836231	-1.19584	PCP down vs VEH
31568_at	RPS10	ribosomal protein S10	NM_001014	0.0841478	1	0.741184	0.492052	1	0.999954	1.03424	1.03424	AHA up vs VEH	0.936535	1	0.97503	1.00403	1.00403	AOL up vs VEH	0.0402497	1	0.514474	1.10857	1.10857	HAL up vs VEH	0.905962	1	0.999992	1.00579	1.00579	OLZ up vs VEH	0.120039	1	0.999678	1.08465	1.08465	PCP+OLZ up vs PCP	0.169413	1	0.999419	0.932014	-1.07294	PCP down vs VEH
32728_at	AMPH	amphiphysin	NM_001635 /// NM_139316	0.0842868	1	0.741184	0.746717	1	0.999954	0.981294	-1.01906	AHA down vs VEH	0.853079	1	0.943891	0.988866	-1.01126	AOL down vs VEH	0.060198	1	0.514474	1.119	1.119	HAL up vs VEH	0.697272	1	0.999992	1.02301	1.02301	OLZ up vs VEH	0.80281	1	0.999678	1.01549	1.01549	PCP+OLZ up vs PCP	0.262503	1	0.999419	0.933909	-1.07077	PCP down vs VEH
831_at	DDX10	DEAD (Asp-Glu-Ala-Asp) box polypeptide 10	NM_004398	0.0844609	1	0.741184	0.226097	1	0.999954	1.08442	1.08442	AHA up vs VEH	0.845023	1	0.940604	0.986678	-1.0135	AOL down vs VEH	0.0399211	1	0.514474	1.15043	1.15043	HAL up vs VEH	0.568026	1	0.999992	1.03867	1.03867	OLZ up vs VEH	0.571825	1	0.999678	1.04034	1.04034	PCP+OLZ up vs PCP	0.370142	1	0.999419	0.940001	-1.06383	PCP down vs VEH
37641_at	IFI44	interferon-induced protein 44	NM_006417	0.0845311	1	0.741184	0.934155	1	0.999954	0.994261	-1.00577	AHA down vs VEH	0.21891	1	0.81859	0.914383	-1.09363	AOL down vs VEH	0.392808	1	0.569222	1.06165	1.06165	HAL up vs VEH	0.73582	1	0.999992	1.0238	1.0238	OLZ up vs VEH	0.640504	1	0.999678	1.0349	1.0349	PCP+OLZ up vs PCP	0.0689998	1	0.999419	0.874464	-1.14356	PCP down vs VEH
32772_s_at	B4GALT1	UDP-Gal:betaGlcNAc beta 1,4- galactosyltransferase, polypeptide 1	NM_001497	0.0848352	1	0.741184	0.46103	1	0.999954	1.04502	1.04502	AHA up vs VEH	0.542736	1	0.834851	0.963119	-1.03829	AOL down vs VEH	0.112091	1	0.514474	1.10097	1.10097	HAL up vs VEH	0.388901	1	0.999992	0.949763	-1.05289	OLZ down vs VEH	0.0736155	1	0.999678	0.891769	-1.12137	PCP+OLZ down vs PCP	0.365411	1	0.999419	1.05771	1.05771	PCP up vs VEH
225_at	GNB3	guanine nucleotide binding protein (G protein), beta polypeptide 3	NM_002075	0.0849158	1	0.741184	0.921354	1	0.999954	0.994424	-1.00561	AHA down vs VEH	0.0431774	1	0.81859	0.885355	-1.12949	AOL down vs VEH	0.408858	1	0.577327	1.04811	1.04811	HAL up vs VEH	0.634501	1	0.999992	0.973397	-1.02733	OLZ down vs VEH	0.633389	1	0.999678	1.02889	1.02889	PCP+OLZ up vs PCP	0.105847	1	0.999419	0.907982	-1.10134	PCP down vs VEH
39749_at	PSMD4	proteasome (prosome, macropain) 26S subunit, non-ATPase, 4	NM_002810	0.0849219	1	0.741184	0.855522	1	0.999954	1.01036	1.01036	AHA up vs VEH	0.200788	1	0.81859	0.927068	-1.07867	AOL down vs VEH	0.652575	1	0.732257	1.02584	1.02584	HAL up vs VEH	0.246653	1	0.999992	1.06839	1.06839	OLZ up vs VEH	0.162408	1	0.999678	1.08799	1.08799	PCP+OLZ up vs PCP	0.0648413	1	0.999419	0.895182	-1.11709	PCP down vs VEH
1633_g_at	PIM2	pim-2 oncogene	NM_006875	0.0849288	1	0.741184	0.503567	1	0.999954	1.04087	1.04087	AHA up vs VEH	0.578512	1	0.846657	0.966192	-1.03499	AOL down vs VEH	0.0365223	1	0.514474	1.13722	1.13722	HAL up vs VEH	0.356836	1	0.999992	1.05689	1.05689	OLZ up vs VEH	0.730708	1	0.999678	1.02189	1.02189	PCP+OLZ up vs PCP	0.461598	1	0.999419	0.955329	-1.04676	PCP down vs VEH
1184_at	PSME2	proteasome (prosome, macropain) activator subunit 2 (PA28 beta)	NM_002818	0.0849395	1	0.741184	0.598164	1	0.999954	1.03419	1.03419	AHA up vs VEH	0.129839	1	0.81859	0.90364	-1.10663	AOL down vs VEH	0.275657	1	0.525108	1.07247	1.07247	HAL up vs VEH	0.649064	1	0.999992	0.971402	-1.02944	OLZ down vs VEH	0.31493	1	0.999678	1.07017	1.07017	PCP+OLZ up vs PCP	0.0921782	1	0.999419	0.892985	-1.11984	PCP down vs VEH
38542_at	NPM1	nucleophosmin (nucleolar phosphoprotein B23, numatrin)	NM_001037738 /// NM_002520 /// NM_199185	0.0851274	1	0.741184	0.506836	1	0.999954	0.957855	-1.044	AHA down vs VEH	0.533898	1	0.831733	0.959125	-1.04262	AOL down vs VEH	0.171479	1	0.514474	1.09369	1.09369	HAL up vs VEH	0.634066	1	0.999992	1.03131	1.03131	OLZ up vs VEH	0.164402	1	0.999678	1.10066	1.10066	PCP+OLZ up vs PCP	0.0647361	1	0.999419	0.881086	-1.13496	PCP down vs VEH
33859_at	SAP18	Sin3A-associated protein, 18kDa	NM_005870	0.0851724	1	0.741184	0.427004	1	0.999954	1.05605	1.05605	AHA up vs VEH	0.650931	1	0.868655	1.03257	1.03257	AOL up vs VEH	0.0125708	1	0.514474	1.19477	1.19477	HAL up vs VEH	0.197043	1	0.999992	1.09329	1.09329	OLZ up vs VEH	0.57187	1	0.999678	1.04162	1.04162	PCP+OLZ up vs PCP	0.631714	1	0.999419	0.966576	-1.03458	PCP down vs VEH
34305_at	PCBP1	poly(rC) binding protein 1	NM_006196	0.0852042	1	0.741184	0.802294	1	0.999954	0.984367	-1.01588	AHA down vs VEH	0.10503	1	0.81859	0.898199	-1.11334	AOL down vs VEH	0.288456	1	0.53051	1.06959	1.06959	HAL up vs VEH	0.328147	1	0.999992	0.939971	-1.06386	OLZ down vs VEH	0.126779	1	0.999678	1.10818	1.10818	PCP+OLZ up vs PCP	0.0620008	1	0.999419	0.882965	-1.13255	PCP down vs VEH
36040_at	SH3BGR	SH3 domain binding glutamic acid-rich protein	NM_001001713 /// NM_007341	0.0854011	1	0.741184	0.566296	1	0.999954	0.965042	-1.03622	AHA down vs VEH	0.183935	1	0.81859	0.917488	-1.08993	AOL down vs VEH	0.286467	1	0.530086	1.06875	1.06875	HAL up vs VEH	0.30423	1	0.999992	0.937953	-1.06615	OLZ down vs VEH	0.0388684	1	0.999678	0.87062	-1.14861	PCP+OLZ down vs PCP	0.448185	1	0.999419	1.05003	1.05003	PCP up vs VEH
40046_r_at	C18orf1	chromosome 18 open reading frame 1	NM_001003674 /// NM_001003675 /// NM_004338 /// NM_181481 /// NM_181482 /// NM_1	0.08545	1	0.741184	0.0265097	1	0.999954	1.1409	1.1409	AHA up vs VEH	0.158414	1	0.81859	1.08871	1.08871	AOL up vs VEH	0.00744722	1	0.514474	1.17521	1.17521	HAL up vs VEH	0.445393	1	0.999992	1.04502	1.04502	OLZ up vs VEH	0.576321	1	0.999678	1.03446	1.03446	PCP+OLZ up vs PCP	0.698179	1	0.999419	1.02338	1.02338	PCP up vs VEH
40215_at	UGCG	UDP-glucose ceramide glucosyltransferase	NM_003358	0.0855549	1	0.741184	0.657125	1	0.999954	1.03155	1.03155	AHA up vs VEH	0.122367	1	0.81859	0.892718	-1.12017	AOL down vs VEH	0.221049	1	0.514735	1.09021	1.09021	HAL up vs VEH	0.232126	1	0.999992	1.08795	1.08795	OLZ up vs VEH	0.351828	1	0.999678	1.07132	1.07132	PCP+OLZ up vs PCP	0.308975	1	0.999419	0.928539	-1.07696	PCP down vs VEH
36650_at	CCND2	cyclin D2	NM_001759	0.0856183	1	0.741184	0.250633	1	0.999954	1.08762	1.08762	AHA up vs VEH	0.287446	1	0.81859	0.922783	-1.08368	AOL down vs VEH	0.0510078	1	0.514474	1.15613	1.15613	HAL up vs VEH	0.195575	1	0.999992	1.0995	1.0995	OLZ up vs VEH	0.368869	1	0.999678	1.07136	1.07136	PCP+OLZ up vs PCP	0.721584	1	0.999419	0.973585	-1.02713	PCP down vs VEH
391_at	PPP5C	protein phosphatase 5, catalytic subunit	NM_006247	0.0859697	1	0.741184	0.565024	1	0.999954	0.958825	-1.04294	AHA down vs VEH	0.152255	1	0.81859	0.896298	-1.1157	AOL down vs VEH	0.465596	1	0.606645	1.05484	1.05484	HAL up vs VEH	0.816425	1	0.999992	0.98321	-1.01708	OLZ down vs VEH	0.041112	1	0.999678	1.17496	1.17496	PCP+OLZ up vs PCP	0.018888	1	0.999419	0.831934	-1.20202	PCP down vs VEH
36000_at	ATF6B	activating transcription factor 6 beta	NM_001136153 /// NM_004381	0.0861221	1	0.741184	0.667686	1	0.999954	0.976945	-1.0236	AHA down vs VEH	0.0725018	1	0.81859	0.902102	-1.10852	AOL down vs VEH	0.416093	1	0.579867	1.04532	1.04532	HAL up vs VEH	0.628045	1	0.999992	0.974013	-1.02668	OLZ down vs VEH	0.156373	1	0.999678	1.08553	1.08553	PCP+OLZ up vs PCP	0.0354643	1	0.999419	0.885361	-1.12948	PCP down vs VEH
36620_at	SOD1	superoxide dismutase 1, soluble	NM_000454	0.0863811	1	0.741184	0.913272	1	0.999954	0.993075	-1.00697	AHA down vs VEH	0.0818279	1	0.81859	0.889394	-1.12436	AOL down vs VEH	0.255353	1	0.519234	1.07594	1.07594	HAL up vs VEH	0.376177	1	0.999992	1.0584	1.0584	OLZ up vs VEH	0.653486	1	0.999678	1.03066	1.03066	PCP+OLZ up vs PCP	0.295466	1	0.999419	0.932729	-1.07212	PCP down vs VEH
32545_r_at	RSU1	Ras suppressor protein 1	NM_012425 /// NM_152724	0.0865968	1	0.741184	0.444892	1	0.999954	1.0493	1.0493	AHA up vs VEH	0.0756793	1	0.81859	0.88889	-1.125	AOL down vs VEH	0.113583	1	0.514474	1.10624	1.10624	HAL up vs VEH	0.905097	1	0.999992	1.00751	1.00751	OLZ up vs VEH	0.755391	1	0.999678	0.979615	-1.02081	PCP+OLZ down vs PCP	0.868056	1	0.999419	1.01086	1.01086	PCP up vs VEH
33910_at	PTPRD	protein tyrosine phosphatase, receptor type, D	NM_001040712 /// NM_002839 /// NM_130391 /// NM_130392 /// NM_130393	0.0867735	1	0.741184	0.304246	1	0.999954	1.06007	1.06007	AHA up vs VEH	0.2717	1	0.81859	0.937411	-1.06677	AOL down vs VEH	0.147448	1	0.514474	1.08635	1.08635	HAL up vs VEH	0.185819	1	0.999992	1.07839	1.07839	OLZ up vs VEH	0.622627	1	0.999678	0.971164	-1.02969	PCP+OLZ down vs PCP	0.845661	1	0.999419	0.988694	-1.01144	PCP down vs VEH
38730_at	MPRIP	myosin phosphatase Rho interacting protein	NM_015134 /// NM_201274	0.0868003	1	0.741184	0.73932	1	0.999954	1.01867	1.01867	AHA up vs VEH	0.20261	1	0.81859	0.928643	-1.07684	AOL down vs VEH	0.115748	1	0.514474	1.0929	1.0929	HAL up vs VEH	0.669808	1	0.999992	1.024	1.024	OLZ up vs VEH	0.378049	1	0.999678	1.05319	1.05319	PCP+OLZ up vs PCP	0.183565	1	0.999419	0.925492	-1.08051	PCP down vs VEH
33720_at	PNO1	partner of NOB1 homolog (S. cerevisiae)	NM_020143	0.0868158	1	0.741184	0.451854	1	0.999954	1.04036	1.04036	AHA up vs VEH	0.482354	1	0.824757	1.03894	1.03894	AOL up vs VEH	0.101652	1	0.514474	1.09123	1.09123	HAL up vs VEH	0.970179	1	0.999992	1.00196	1.00196	OLZ up vs VEH	0.00867521	1	0.999678	0.859279	-1.16377	PCP+OLZ down vs PCP	0.0851344	1	0.999419	1.09998	1.09998	PCP up vs VEH
35474_s_at	COL1A1	collagen, type I, alpha 1	NM_000088	0.086849	1	0.741184	0.315101	1	0.999954	1.0576	1.0576	AHA up vs VEH	0.69736	1	0.885685	0.977945	-1.02255	AOL down vs VEH	0.122602	1	0.514474	1.09076	1.09076	HAL up vs VEH	0.964044	1	0.999992	1.0025	1.0025	OLZ up vs VEH	0.370946	1	0.999678	1.05384	1.05384	PCP+OLZ up vs PCP	0.135569	1	0.999419	0.91678	-1.09077	PCP down vs VEH
471_f_at	TUBB3	tubulin, beta 3	NM_006086	0.0870028	1	0.741184	0.825327	1	0.999954	1.01187	1.01187	AHA up vs VEH	0.334853	1	0.81859	0.947742	-1.05514	AOL down vs VEH	0.0947266	1	0.514474	1.09529	1.09529	HAL up vs VEH	0.156082	1	0.999992	1.07989	1.07989	OLZ up vs VEH	0.111209	1	0.999678	1.09548	1.09548	PCP+OLZ up vs PCP	0.349738	1	0.999419	0.94925	-1.05346	PCP down vs VEH
843_at	PTP4A1	protein tyrosine phosphatase type IVA, member 1	NM_003463	0.0870299	1	0.741184	0.490163	1	0.999954	1.04332	1.04332	AHA up vs VEH	0.699057	1	0.887075	0.975771	-1.02483	AOL down vs VEH	0.0247651	1	0.514474	1.1529	1.1529	HAL up vs VEH	0.463619	1	0.999992	1.04609	1.04609	OLZ up vs VEH	0.656184	1	0.999678	1.02917	1.02917	PCP+OLZ up vs PCP	0.485834	1	0.999419	0.956602	-1.04537	PCP down vs VEH
40115_at	ATP5C1	ATP synthase, H+ transporting, mitochondrial F1 complex, gamma polypeptide 1	NM_001001973 /// NM_005174	0.0871734	1	0.741184	0.211711	1	0.999954	1.0728	1.0728	AHA up vs VEH	0.825641	1	0.933095	0.987385	-1.01278	AOL down vs VEH	0.00759376	1	0.514474	1.16881	1.16881	HAL up vs VEH	0.287307	1	0.999992	1.06152	1.06152	OLZ up vs VEH	0.317904	1	0.999678	1.06072	1.06072	PCP+OLZ up vs PCP	0.916968	1	0.999419	1.00603	1.00603	PCP up vs VEH
623_s_at	RAB2A	RAB2A, member RAS oncogene family	NM_002865	0.087758	1	0.741184	0.293286	1	0.999954	0.920309	-1.08659	AHA down vs VEH	0.0770428	1	0.81859	0.863705	-1.1578	AOL down vs VEH	0.491893	1	0.623513	1.05557	1.05557	HAL up vs VEH	0.843635	1	0.999992	0.984643	-1.0156	OLZ down vs VEH	0.0947657	1	0.999678	1.15095	1.15095	PCP+OLZ up vs PCP	0.0341397	1	0.999419	0.837464	-1.19408	PCP down vs VEH
33689_s_at	DDT	D-dopachrome tautomerase	NM_001084392 /// NM_001355	0.08797	1	0.741184	0.421661	1	0.999954	0.953222	-1.04907	AHA down vs VEH	0.043168	1	0.81859	0.880164	-1.13615	AOL down vs VEH	0.538033	1	0.653649	1.03733	1.03733	HAL up vs VEH	0.0497791	1	0.999992	0.887354	-1.12695	OLZ down vs VEH	0.982168	1	0.999678	0.998604	-1.0014	PCP+OLZ down vs PCP	0.262643	1	0.999419	0.932903	-1.07192	PCP down vs VEH
37096_at	ELANE	elastase, neutrophil expressed	NM_001972	0.0879856	1	0.741184	0.72581	1	0.999954	1.02027	1.02027	AHA up vs VEH	0.214924	1	0.81859	0.928561	-1.07693	AOL down vs VEH	0.235674	1	0.516024	1.07084	1.07084	HAL up vs VEH	0.786716	1	0.999992	0.98464	-1.0156	OLZ down vs VEH	0.0237631	1	0.999678	0.868603	-1.15127	PCP+OLZ down vs PCP	0.224439	1	0.999419	1.07536	1.07536	PCP up vs VEH
40045_g_at	C18orf1	chromosome 18 open reading frame 1	NM_001003674 /// NM_001003675 /// NM_004338 /// NM_181481 /// NM_181482 /// NM_1	0.0880188	1	0.741184	0.196023	1	0.999954	1.08935	1.08935	AHA up vs VEH	0.253535	1	0.81859	0.924969	-1.08112	AOL down vs VEH	0.0717076	1	0.514474	1.12803	1.12803	HAL up vs VEH	0.434753	1	0.999992	1.05267	1.05267	OLZ up vs VEH	0.764943	1	0.999678	0.979594	-1.02083	PCP+OLZ down vs PCP	0.958299	1	0.999419	0.996461	-1.00355	PCP down vs VEH
240_at	SRM	spermidine synthase	NM_003132	0.0881498	1	0.741184	0.93588	1	0.999954	1.00482	1.00482	AHA up vs VEH	0.0644238	1	0.81859	0.889565	-1.12414	AOL down vs VEH	0.292501	1	0.531953	1.06545	1.06545	HAL up vs VEH	0.395178	1	0.999992	0.950208	-1.0524	OLZ down vs VEH	0.269251	1	0.999678	1.07262	1.07262	PCP+OLZ up vs PCP	0.116623	1	0.999419	0.905953	-1.10381	PCP down vs VEH
376_at	SEMA3C	sema domain, immunoglobulin domain (Ig), short basic domain, secreted, (semaphor	NM_006379	0.0885345	1	0.741184	0.325798	1	0.999954	1.06769	1.06769	AHA up vs VEH	0.35666	1	0.81859	0.938456	-1.06558	AOL down vs VEH	0.0563452	1	0.514474	1.13828	1.13828	HAL up vs VEH	0.795196	1	0.999992	0.982947	-1.01735	OLZ down vs VEH	0.707512	1	0.999678	0.974152	-1.02653	PCP+OLZ down vs PCP	0.817303	1	0.999419	0.984272	-1.01598	PCP down vs VEH
1248_at	POLR2H	polymerase (RNA) II (DNA directed) polypeptide H	NM_006232	0.0888364	1	0.741184	0.570739	1	0.999954	1.03213	1.03213	AHA up vs VEH	0.204687	1	0.81859	0.928837	-1.07662	AOL down vs VEH	0.0799104	1	0.514474	1.10461	1.10461	HAL up vs VEH	0.449397	1	0.999992	1.04317	1.04317	OLZ up vs VEH	0.751931	1	0.999678	1.01871	1.01871	PCP+OLZ up vs PCP	0.464263	1	0.999419	0.958543	-1.04325	PCP down vs VEH
147_at	TSG101	tumor susceptibility gene 101	NM_006292	0.0889784	1	0.741184	0.998002	1	0.999954	1.00017	1.00017	AHA up vs VEH	0.367794	1	0.81859	0.936926	-1.06732	AOL down vs VEH	0.0503702	1	0.514474	1.14984	1.14984	HAL up vs VEH	0.722223	1	0.999992	1.02505	1.02505	OLZ up vs VEH	0.477274	1	0.999678	1.0536	1.0536	PCP+OLZ up vs PCP	0.291066	1	0.999419	0.926245	-1.07963	PCP down vs VEH
1754_at	DAXX	death-domain associated protein	NM_001141969 /// NM_001141970 /// NM_001350 /// NR_024517	0.0893198	1	0.741184	0.543295	1	0.999954	1.0403	1.0403	AHA up vs VEH	0.450728	1	0.820158	0.950479	-1.0521	AOL down vs VEH	0.0220881	1	0.514474	1.16619	1.16619	HAL up vs VEH	0.530674	1	0.999992	1.04161	1.04161	OLZ up vs VEH	0.574984	1	0.999678	1.03911	1.03911	PCP+OLZ up vs PCP	0.63229	1	0.999419	0.968325	-1.03271	PCP down vs VEH
35627_at	SNTA1	syntrophin, alpha 1 (dystrophin-associated protein A1, 59kDa, acidic component)	NM_003098	0.0893753	1	0.741184	0.426117	1	0.999954	1.0481	1.0481	AHA up vs VEH	0.0262584	1	0.81859	0.869617	-1.14993	AOL down vs VEH	0.796669	1	0.841602	1.01527	1.01527	HAL up vs VEH	0.901582	1	0.999992	0.992757	-1.0073	OLZ down vs VEH	0.781696	1	0.999678	1.0173	1.0173	PCP+OLZ up vs PCP	0.275104	1	0.999419	0.935223	-1.06926	PCP down vs VEH
38804_at	CSE1L	CSE1 chromosome segregation 1-like (yeast)	NM_001316	0.0894342	1	0.741184	0.471724	1	0.999954	1.0544	1.0544	AHA up vs VEH	0.178681	1	0.81859	0.90186	-1.10882	AOL down vs VEH	0.153316	1	0.514474	1.11202	1.11202	HAL up vs VEH	0.554193	1	0.999992	1.04445	1.04445	OLZ up vs VEH	0.778131	1	0.999678	1.02201	1.02201	PCP+OLZ up vs PCP	0.320652	1	0.999419	0.926865	-1.07891	PCP down vs VEH
37304_at	CBX1	chromobox homolog 1 (HP1 beta homolog Drosophila )	NM_001127228 /// NM_006807	0.0896947	1	0.741184	0.449854	1	0.999954	1.03792	1.03792	AHA up vs VEH	0.672422	1	0.877431	0.97874	-1.02172	AOL down vs VEH	0.0139295	1	0.514474	1.13391	1.13391	HAL up vs VEH	0.816657	1	0.999992	1.01144	1.01144	OLZ up vs VEH	0.931594	1	0.999678	0.995575	-1.00444	PCP+OLZ down vs PCP	0.997091	1	0.999756	0.999815	-1.00019	PCP down vs VEH
37095_r_at	FPR2	formyl peptide receptor 2	NM_001005738 /// NM_001462	0.0897049	1	0.741184	0.972934	1	0.999954	1.00172	1.00172	AHA up vs VEH	0.0938369	1	0.81859	0.914388	-1.09363	AOL down vs VEH	0.320978	1	0.541961	1.05192	1.05192	HAL up vs VEH	0.424852	1	0.999992	0.960205	-1.04144	OLZ down vs VEH	0.0479513	1	0.999678	1.1144	1.1144	PCP+OLZ up vs PCP	0.121162	1	0.999419	0.920665	-1.08617	PCP down vs VEH
39336_at	ARF3	ADP-ribosylation factor 3	NM_001659	0.0897448	1	0.741184	0.777633	1	0.999954	1.01543	1.01543	AHA up vs VEH	0.15731	1	0.81859	0.922771	-1.08369	AOL down vs VEH	0.104096	1	0.514474	1.09382	1.09382	HAL up vs VEH	0.320592	1	0.999992	1.05569	1.05569	OLZ up vs VEH	0.28956	1	0.999678	1.06279	1.06279	PCP+OLZ up vs PCP	0.382482	1	0.999419	0.951913	-1.05052	PCP down vs VEH
1305_s_at	CYP4F2 /// CYP4F3	cytochrome P450, family 4, subfamily F, polypeptide 2 /// cytochrome P450, famil	NM_000896 /// NM_001082	0.0905049	1	0.741184	0.256898	1	0.999954	1.07967	1.07967	AHA up vs VEH	0.982376	1	0.993543	0.998469	-1.00153	AOL down vs VEH	0.0228377	1	0.514474	1.17116	1.17116	HAL up vs VEH	0.410271	1	0.999992	1.05701	1.05701	OLZ up vs VEH	0.810541	1	0.999678	1.01707	1.01707	PCP+OLZ up vs PCP	0.599445	1	0.999419	0.964127	-1.03721	PCP down vs VEH
37384_at	PPM1F	protein phosphatase 1F (PP2C domain containing)	NM_014634	0.0906024	1	0.741184	0.17532	1	0.999954	1.07127	1.07127	AHA up vs VEH	0.182642	1	0.81859	0.932388	-1.07252	AOL down vs VEH	0.093933	1	0.514474	1.08941	1.08941	HAL up vs VEH	0.762573	1	0.999992	1.01528	1.01528	OLZ up vs VEH	0.476422	1	0.999678	1.03847	1.03847	PCP+OLZ up vs PCP	0.633496	1	0.999419	0.975488	-1.02513	PCP down vs VEH
41836_at	CHERP	calcium homeostasis endoplasmic reticulum protein	NM_006387	0.0906172	1	0.741184	0.66706	1	0.999954	1.03128	1.03128	AHA up vs VEH	0.122893	1	0.81859	0.890494	-1.12297	AOL down vs VEH	0.150913	1	0.514474	1.10976	1.10976	HAL up vs VEH	0.980339	1	0.999992	1.00176	1.00176	OLZ up vs VEH	0.818179	1	0.999678	1.01747	1.01747	PCP+OLZ up vs PCP	0.298738	1	0.999419	0.9254	-1.08061	PCP down vs VEH
34926_at	CD1A	CD1a molecule	NM_001763	0.0906923	1	0.741184	0.243112	1	0.999954	1.06227	1.06227	AHA up vs VEH	0.154687	1	0.81859	0.92632	-1.07954	AOL down vs VEH	0.182495	1	0.514474	1.07163	1.07163	HAL up vs VEH	0.736752	1	0.999992	0.982896	-1.0174	OLZ down vs VEH	0.200049	1	0.999678	1.07245	1.07245	PCP+OLZ up vs PCP	0.338417	1	0.999419	0.950128	-1.05249	PCP down vs VEH
31858_at	NUTF2	nuclear transport factor 2	NM_005796	0.0907833	1	0.741184	0.650653	1	0.999954	1.02657	1.02657	AHA up vs VEH	0.530413	1	0.831219	0.963071	-1.03834	AOL down vs VEH	0.0815467	1	0.514474	1.10824	1.10824	HAL up vs VEH	0.179516	1	0.999992	1.08172	1.08172	OLZ up vs VEH	0.488497	1	0.999678	1.04321	1.04321	PCP+OLZ up vs PCP	0.315465	1	0.999419	0.941274	-1.06239	PCP down vs VEH
654_at	MXI1	MAX interactor 1	NM_001008541 /// NM_005962 /// NM_130439	0.0907912	1	0.741184	0.165289	1	0.999954	0.903602	-1.10668	AHA down vs VEH	0.117046	1	0.81859	0.88791	-1.12624	AOL down vs VEH	0.258638	1	0.520268	1.08564	1.08564	HAL up vs VEH	0.850912	1	0.999992	0.986532	-1.01365	OLZ down vs VEH	0.304688	1	0.999678	1.08165	1.08165	PCP+OLZ up vs PCP	0.140659	1	0.999419	0.89434	-1.11814	PCP down vs VEH
41814_at	FUCA1	fucosidase, alpha-L- 1, tissue	NM_000147	0.0907965	1	0.741184	0.952297	1	0.999954	0.996172	-1.00384	AHA down vs VEH	0.844829	1	0.94053	0.987099	-1.01307	AOL down vs VEH	0.0801005	1	0.514474	1.12134	1.12134	HAL up vs VEH	0.988535	1	0.999992	0.999079	-1.00092	OLZ down vs VEH	0.0852129	1	0.999678	1.12581	1.12581	PCP+OLZ up vs PCP	0.0874085	1	0.999419	0.89071	-1.1227	PCP down vs VEH
36224_g_at	SFPQ	splicing factor proline/glutamine-rich (polypyrimidine tract binding protein ass	NM_005066	0.0908141	1	0.741184	0.78169	1	0.999954	1.01539	1.01539	AHA up vs VEH	0.729199	1	0.900307	0.980452	-1.01994	AOL down vs VEH	0.0274869	1	0.514474	1.13366	1.13366	HAL up vs VEH	0.273174	1	0.999992	1.06272	1.06272	OLZ up vs VEH	0.112747	1	0.999678	0.910717	-1.09804	PCP+OLZ down vs PCP	0.24373	1	0.999419	1.06941	1.06941	PCP up vs VEH
37759_at	LAPTM5	lysosomal protein transmembrane 5	NM_006762	0.0909238	1	0.741184	0.09264	1	0.999954	1.10399	1.10399	AHA up vs VEH	0.858591	1	0.947966	0.989413	-1.0107	AOL down vs VEH	0.0917957	1	0.514474	1.10429	1.10429	HAL up vs VEH	0.378579	1	0.999992	1.05242	1.05242	OLZ up vs VEH	0.414841	1	0.999678	1.05104	1.05104	PCP+OLZ up vs PCP	0.330613	1	0.999419	0.943141	-1.06029	PCP down vs VEH
32843_s_at	FBL	fibrillarin	NM_001436	0.0910202	1	0.741184	0.830643	1	0.999954	1.01281	1.01281	AHA up vs VEH	0.337365	1	0.81859	1.06122	1.06122	AOL up vs VEH	0.0151107	1	0.514474	1.16232	1.16232	HAL up vs VEH	0.371595	1	0.999992	1.05489	1.05489	OLZ up vs VEH	0.272686	1	0.999678	1.07172	1.07172	PCP+OLZ up vs PCP	0.497427	1	0.999419	0.958926	-1.04283	PCP down vs VEH
34781_at	DCTN6	dynactin 6	NM_006571	0.0912201	1	0.741184	0.916995	1	0.999954	1.00769	1.00769	AHA up vs VEH	0.321654	1	0.81859	0.92691	-1.07885	AOL down vs VEH	0.0652483	1	0.514474	1.14878	1.14878	HAL up vs VEH	0.765712	1	0.999992	1.02217	1.02217	OLZ up vs VEH	0.315475	1	0.999678	1.08139	1.08139	PCP+OLZ up vs PCP	0.21358	1	0.999419	0.908718	-1.10045	PCP down vs VEH
40091_at	BCL6	B-cell CLL/lymphoma 6	NM_001130845 /// NM_001134738 /// NM_001706	0.0912627	1	0.741184	0.988617	1	0.999954	0.99904	-1.00096	AHA down vs VEH	0.0202641	1	0.81859	0.845622	-1.18256	AOL down vs VEH	0.342332	1	0.552081	1.06643	1.06643	HAL up vs VEH	0.529975	1	0.999992	0.958488	-1.04331	OLZ down vs VEH	0.758138	1	0.999678	1.02208	1.02208	PCP+OLZ up vs PCP	0.487575	1	0.999419	0.952595	-1.04976	PCP down vs VEH
140_s_at	TRA2B	transformer 2 beta homolog (Drosophila)	NM_004593	0.0914826	1	0.741184	0.808018	1	0.999954	0.983912	-1.01635	AHA down vs VEH	0.461027	1	0.821908	0.950213	-1.0524	AOL down vs VEH	0.0488857	1	0.514474	1.1444	1.1444	HAL up vs VEH	0.616358	1	0.999992	1.03405	1.03405	OLZ up vs VEH	0.766919	1	0.999678	1.02105	1.02105	PCP+OLZ up vs PCP	0.388517	1	0.999419	0.941871	-1.06172	PCP down vs VEH
35777_at	RNF4	ring finger protein 4	NM_002938	0.0915875	1	0.741184	0.776666	1	0.999954	0.983438	-1.01684	AHA down vs VEH	0.0845393	1	0.81859	0.898417	-1.11307	AOL down vs VEH	0.156408	1	0.514474	1.08819	1.08819	HAL up vs VEH	0.935706	1	0.999992	1.00476	1.00476	OLZ up vs VEH	0.919047	1	0.999678	1.00632	1.00632	PCP+OLZ up vs PCP	0.343823	1	0.999419	0.943614	-1.05976	PCP down vs VEH
320_at	PEX6	peroxisomal biogenesis factor 6	NM_000287	0.0916268	1	0.741184	0.830609	1	0.999954	1.01397	1.01397	AHA up vs VEH	0.160749	1	0.81859	0.909058	-1.10004	AOL down vs VEH	0.316613	1	0.539483	1.06756	1.06756	HAL up vs VEH	0.808844	1	0.999992	0.984428	-1.01582	OLZ down vs VEH	0.197596	1	0.999678	1.09303	1.09303	PCP+OLZ up vs PCP	0.0488574	1	0.999419	0.873018	-1.14545	PCP down vs VEH
1001_at	TIE1	tyrosine kinase with immunoglobulin-like and EGF-like domains 1	NM_005424	0.0916557	1	0.741184	0.910176	1	0.999954	0.992227	-1.00783	AHA down vs VEH	0.0245661	1	0.81859	0.846692	-1.18107	AOL down vs VEH	0.453465	1	0.599489	1.05342	1.05342	HAL up vs VEH	0.626623	1	0.999992	0.966864	-1.03427	OLZ down vs VEH	0.338283	1	0.999678	0.932253	-1.07267	PCP+OLZ down vs PCP	0.717821	1	0.999419	0.974425	-1.02625	PCP down vs VEH
35917_at	MAP1A	microtubule-associated protein 1A	NM_002373	0.0917194	1	0.741184	0.411406	1	0.999954	1.04059	1.04059	AHA up vs VEH	0.607244	1	0.856231	0.974636	-1.02602	AOL down vs VEH	0.0151058	1	0.514474	1.12968	1.12968	HAL up vs VEH	0.0728033	1	0.999992	1.09243	1.09243	OLZ up vs VEH	0.971988	1	0.999678	0.998219	-1.00178	PCP+OLZ down vs PCP	0.402396	1	0.999419	1.04292	1.04292	PCP up vs VEH
1241_at	PTP4A2	protein tyrosine phosphatase type IVA, member 2	NM_080391 /// NM_080392	0.0917719	1	0.741184	0.239456	1	0.999954	1.07058	1.07058	AHA up vs VEH	0.167146	1	0.81859	0.920214	-1.0867	AOL down vs VEH	0.0997328	1	0.514474	1.10108	1.10108	HAL up vs VEH	0.29513	1	0.999992	1.06245	1.06245	OLZ up vs VEH	0.389559	1	0.999678	0.949051	-1.05368	PCP+OLZ down vs PCP	0.363742	1	0.999419	1.05584	1.05584	PCP up vs VEH
33960_s_at	CACNA1B	calcium channel, voltage-dependent, N type, alpha 1B subunit	NM_000718	0.0917924	1	0.741184	0.464066	1	0.999954	1.04098	1.04098	AHA up vs VEH	0.427725	1	0.819966	0.955965	-1.04606	AOL down vs VEH	0.0342534	1	0.514474	1.12665	1.12665	HAL up vs VEH	0.584294	1	0.999992	1.03042	1.03042	OLZ up vs VEH	0.690295	1	0.999678	0.977309	-1.02322	PCP+OLZ down vs PCP	0.871921	1	0.999419	0.990913	-1.00917	PCP down vs VEH
38399_at	SNRPB2	small nuclear ribonucleoprotein polypeptide B''	NM_003092 /// NM_198220	0.0917929	1	0.741184	0.467465	1	0.999954	1.04658	1.04658	AHA up vs VEH	0.357826	1	0.81859	0.942016	-1.06155	AOL down vs VEH	0.0366248	1	0.514474	1.14382	1.14382	HAL up vs VEH	0.672007	1	0.999992	1.02682	1.02682	OLZ up vs VEH	0.627119	1	0.999678	1.0325	1.0325	PCP+OLZ up vs PCP	0.521201	1	0.999419	0.959255	-1.04248	PCP down vs VEH
36614_at	HSPA5	heat shock 70kDa protein 5 (glucose-regulated protein, 78kDa)	NM_005347	0.0918218	1	0.741184	0.802029	1	0.999954	1.01848	1.01848	AHA up vs VEH	0.159792	1	0.81859	0.898008	-1.11358	AOL down vs VEH	0.161326	1	0.514474	1.10915	1.10915	HAL up vs VEH	0.269107	1	0.999992	1.08473	1.08473	OLZ up vs VEH	0.462396	1	0.999678	1.05832	1.05832	PCP+OLZ up vs PCP	0.316309	1	0.999419	0.926565	-1.07926	PCP down vs VEH
31623_f_at	MT1A	metallothionein 1A	NM_005946	0.0918554	1	0.741184	0.173085	1	0.999954	1.07493	1.07493	AHA up vs VEH	0.548175	1	0.835303	1.03316	1.03316	AOL up vs VEH	0.0202268	1	0.514474	1.13443	1.13443	HAL up vs VEH	0.544683	1	0.999992	1.03232	1.03232	OLZ up vs VEH	0.0377959	1	0.999678	1.12515	1.12515	PCP+OLZ up vs PCP	0.469774	1	0.999419	0.96141	-1.04014	PCP down vs VEH
41776_at	ATOX1	ATX1 antioxidant protein 1 homolog (yeast)	NM_004045	0.0919215	1	0.741184	0.757004	1	0.999954	1.01655	1.01655	AHA up vs VEH	0.0710998	1	0.81859	0.903755	-1.10649	AOL down vs VEH	0.165786	1	0.514474	1.07728	1.07728	HAL up vs VEH	0.514029	1	0.999992	1.03531	1.03531	OLZ up vs VEH	0.467877	1	0.999678	1.04151	1.04151	PCP+OLZ up vs PCP	0.429595	1	0.999419	0.957373	-1.04452	PCP down vs VEH
39556_at	SPTBN1	spectrin, beta, non-erythrocytic 1	NM_003128 /// NM_178313	0.0923094	1	0.741184	0.753663	1	0.999954	1.01855	1.01855	AHA up vs VEH	0.27077	1	0.81859	0.934979	-1.06954	AOL down vs VEH	0.117166	1	0.514474	1.09771	1.09771	HAL up vs VEH	0.711674	1	0.999992	1.02189	1.02189	OLZ up vs VEH	0.452163	1	0.999678	1.0476	1.0476	PCP+OLZ up vs PCP	0.169025	1	0.999419	0.919028	-1.08811	PCP down vs VEH
31900_at	KCNAB2	potassium voltage-gated channel, shaker-related subfamily, beta member 2	NM_003636 /// NM_172130	0.0923603	1	0.741184	0.66747	1	0.999954	1.02413	1.02413	AHA up vs VEH	0.363093	1	0.81859	0.948896	-1.05386	AOL down vs VEH	0.19813	1	0.514474	1.07481	1.07481	HAL up vs VEH	0.812808	1	0.999992	0.986952	-1.01322	OLZ down vs VEH	0.0426677	1	0.999678	1.12933	1.12933	PCP+OLZ up vs PCP	0.0555512	1	0.999419	0.89344	-1.11927	PCP down vs VEH
39149_at	PRCC	papillary renal cell carcinoma (translocation-associated)	NM_005973 /// NM_199416	0.0924917	1	0.741184	0.494022	1	0.999954	1.03981	1.03981	AHA up vs VEH	0.189417	1	0.81859	0.924835	-1.08127	AOL down vs VEH	0.104351	1	0.514474	1.09862	1.09862	HAL up vs VEH	0.447216	1	0.999992	1.04437	1.04437	OLZ up vs VEH	0.422712	1	0.999678	1.04941	1.04941	PCP+OLZ up vs PCP	0.33188	1	0.999419	0.944083	-1.05923	PCP down vs VEH
36587_at	EEF2	eukaryotic translation elongation factor 2	NM_001961	0.0925462	1	0.741184	0.837333	1	0.999954	1.01089	1.01089	AHA up vs VEH	0.0149407	1	0.81859	0.87093	-1.1482	AOL down vs VEH	0.989205	1	0.99136	0.999287	-1.00071	HAL down vs VEH	0.698676	1	0.999992	0.979773	-1.02064	OLZ down vs VEH	0.863358	1	0.999678	1.0096	1.0096	PCP+OLZ up vs PCP	0.150201	1	0.999419	0.923409	-1.08294	PCP down vs VEH
38495_s_at	FUT3	fucosyltransferase 3 (galactoside 3(4)-L-fucosyltransferase, Lewis blood group)	NM_000149 /// NM_001097639 /// NM_001097640 /// NM_001097641	0.0925477	1	0.741184	0.620646	1	0.999954	1.03018	1.03018	AHA up vs VEH	0.244112	1	0.81859	0.929658	-1.07566	AOL down vs VEH	0.0639655	1	0.514474	1.12041	1.12041	HAL up vs VEH	0.829842	1	0.999992	1.01298	1.01298	OLZ up vs VEH	0.150482	1	0.999678	1.09643	1.09643	PCP+OLZ up vs PCP	0.300376	1	0.999419	0.937254	-1.06695	PCP down vs VEH
40272_at	CRMP1	collapsin response mediator protein 1	NM_001014809 /// NM_001313	0.0926765	1	0.741184	0.560984	1	0.999954	1.03996	1.03996	AHA up vs VEH	0.215162	1	0.81859	0.916569	-1.09102	AOL down vs VEH	0.535873	1	0.652396	1.04262	1.04262	HAL up vs VEH	0.152046	1	0.999992	1.10257	1.10257	OLZ up vs VEH	0.217592	1	0.999678	1.09218	1.09218	PCP+OLZ up vs PCP	0.156044	1	0.999419	0.90472	-1.10531	PCP down vs VEH
31557_at	TMSB4X	thymosin beta 4, X-linked	NM_021109	0.0929309	1	0.741184	0.729629	1	0.999954	1.01658	1.01658	AHA up vs VEH	0.777422	1	0.913626	0.986185	-1.01401	AOL down vs VEH	0.0206702	1	0.514474	1.1208	1.1208	HAL up vs VEH	0.626831	1	0.999992	1.02342	1.02342	OLZ up vs VEH	0.0816464	1	0.999678	1.09301	1.09301	PCP+OLZ up vs PCP	0.508718	1	0.999419	0.967892	-1.03317	PCP down vs VEH
34642_at	YWHAZ	tyrosine 3-monooxygenase/tryptophan 5-monooxygenase activation protein, zeta pol	NM_001135699 /// NM_001135700 /// NM_001135701 /// NM_001135702 /// NM_003406 //	0.093098	1	0.741184	0.151917	1	0.999954	0.916543	-1.09106	AHA down vs VEH	0.635229	1	0.864471	0.970942	-1.02993	AOL down vs VEH	0.0858487	1	0.514474	0.900226	-1.11083	HAL down vs VEH	0.0773481	1	0.999992	0.897444	-1.11428	OLZ down vs VEH	0.0162183	1	0.999678	1.17102	1.17102	PCP+OLZ up vs PCP	0.0188046	1	0.999419	0.859405	-1.1636	PCP down vs VEH
36629_at	TSC22D3	TSC22 domain family, member 3	NM_001015881 /// NM_004089 /// NM_198057	0.0932709	1	0.741184	0.313609	1	0.999954	1.0579	1.0579	AHA up vs VEH	0.231318	1	0.81859	0.93299	-1.07182	AOL down vs VEH	0.115159	1	0.514474	1.09293	1.09293	HAL up vs VEH	0.579352	1	0.999992	1.0313	1.0313	OLZ up vs VEH	0.295757	1	0.999678	1.06345	1.06345	PCP+OLZ up vs PCP	0.271566	1	0.999419	0.938299	-1.06576	PCP down vs VEH
33458_r_at	C2orf61 /// CALM2	chromosome 2 open reading frame 61 /// calmodulin 2 (phosphorylase kinase, delta	NM_001163561 /// NM_001743 /// NM_173649	0.0934924	1	0.741184	0.490763	1	0.999954	1.03899	1.03899	AHA up vs VEH	0.292077	1	0.81859	0.941044	-1.06265	AOL down vs VEH	0.096394	1	0.514474	1.09825	1.09825	HAL up vs VEH	0.440447	1	0.999992	1.04379	1.04379	OLZ up vs VEH	0.147405	1	0.999678	1.08937	1.08937	PCP+OLZ up vs PCP	0.211013	1	0.999419	0.930121	-1.07513	PCP down vs VEH
39748_at	SLC7A1	solute carrier family 7 (cationic amino acid transporter, y+ system), member 1	NM_003045	0.0935858	1	0.741184	0.664194	1	0.999954	0.975853	-1.02474	AHA down vs VEH	0.221321	1	0.81859	0.930654	-1.07451	AOL down vs VEH	0.381459	1	0.564406	1.05071	1.05071	HAL up vs VEH	0.238513	1	0.999992	0.935288	-1.06919	OLZ down vs VEH	0.381497	1	0.999678	1.05346	1.05346	PCP+OLZ up vs PCP	0.0390802	1	0.999419	0.883678	-1.13163	PCP down vs VEH
37332_r_at	ALDH4A1	aldehyde dehydrogenase 4 family, member A1	NM_001161504 /// NM_003748 /// NM_170726	0.0936107	1	0.741184	0.668418	1	0.999954	0.973736	-1.02697	AHA down vs VEH	0.141349	1	0.81859	0.908635	-1.10055	AOL down vs VEH	0.334873	1	0.548045	1.06207	1.06207	HAL up vs VEH	0.712849	1	0.999992	0.977398	-1.02312	OLZ down vs VEH	0.0198913	1	0.999678	1.17093	1.17093	PCP+OLZ up vs PCP	0.0810605	1	0.999419	0.891856	-1.12126	PCP down vs VEH
31952_at	RPL6	ribosomal protein L6	NM_000970 /// NM_001024662	0.0936321	1	0.741184	0.556734	1	0.999954	1.0372	1.0372	AHA up vs VEH	0.79226	1	0.919846	0.98324	-1.01705	AOL down vs VEH	0.0517083	1	0.514474	1.13171	1.13171	HAL up vs VEH	0.41718	1	0.999992	1.05182	1.05182	OLZ up vs VEH	0.0833601	1	0.999678	1.12223	1.12223	PCP+OLZ up vs PCP	0.172893	1	0.999419	0.915194	-1.09266	PCP down vs VEH
34650_at	PDE3A	phosphodiesterase 3A, cGMP-inhibited	NM_000921	0.0936362	1	0.741184	0.388887	1	0.999954	1.04628	1.04628	AHA up vs VEH	0.985548	1	0.994737	1.00098	1.00098	AOL up vs VEH	0.0130605	1	0.514474	1.14475	1.14475	HAL up vs VEH	0.99022	1	0.999992	1.00064	1.00064	OLZ up vs VEH	0.270644	1	0.999678	0.94074	-1.06299	PCP+OLZ down vs PCP	0.333845	1	0.999419	1.05403	1.05403	PCP up vs VEH
40127_at	SFXN3	sideroflexin 3	NM_030971	0.0938489	1	0.741184	0.0613335	1	0.999954	1.10176	1.10176	AHA up vs VEH	0.177775	1	0.81859	0.931092	-1.07401	AOL down vs VEH	0.186644	1	0.514474	1.06993	1.06993	HAL up vs VEH	0.540423	1	0.999992	1.03154	1.03154	OLZ up vs VEH	0.718958	1	0.999678	1.01937	1.01937	PCP+OLZ up vs PCP	0.718179	1	0.999419	1.01911	1.01911	PCP up vs VEH
138_at	MAP4K1	mitogen-activated protein kinase kinase kinase kinase 1	NM_001042600 /// NM_007181	0.0939343	1	0.741184	0.708727	1	0.999954	0.97592	-1.02467	AHA down vs VEH	0.214168	1	0.81859	0.918838	-1.08833	AOL down vs VEH	0.279127	1	0.526473	1.0737	1.0737	HAL up vs VEH	0.956416	1	0.999992	0.996444	-1.00357	OLZ down vs VEH	0.572128	1	0.999678	1.03962	1.03962	PCP+OLZ up vs PCP	0.0719475	1	0.999419	0.883236	-1.1322	PCP down vs VEH
36571_at	TOP2B	topoisomerase (DNA) II beta 180kDa	NM_001068	0.093965	1	0.741184	0.961346	1	0.999954	1.0027	1.0027	AHA up vs VEH	0.297791	1	0.81859	0.941413	-1.06223	AOL down vs VEH	0.104054	1	0.514474	1.09643	1.09643	HAL up vs VEH	0.75933	1	0.999992	1.0172	1.0172	OLZ up vs VEH	0.663928	1	0.999678	0.974836	-1.02581	PCP+OLZ down vs PCP	0.448111	1	0.999419	0.957063	-1.04486	PCP down vs VEH
39980_at	VRK1	vaccinia related kinase 1	NM_003384	0.0940265	1	0.741184	0.474783	1	0.999954	1.04976	1.04976	AHA up vs VEH	0.121606	1	0.81859	0.895642	-1.11652	AOL down vs VEH	0.164997	1	0.514474	1.09993	1.09993	HAL up vs VEH	0.4278	1	0.999992	1.05541	1.05541	OLZ up vs VEH	0.662456	1	0.999678	1.03165	1.03165	PCP+OLZ up vs PCP	0.417684	1	0.999419	0.944504	-1.05876	PCP down vs VEH
38885_at	DNA2	DNA replication helicase 2 homolog (yeast)	NM_001080449	0.0940826	1	0.741184	0.342181	1	0.999954	1.04916	1.04916	AHA up vs VEH	0.238626	1	0.81859	0.940073	-1.06375	AOL down vs VEH	0.0994418	1	0.514474	1.08791	1.08791	HAL up vs VEH	0.59013	1	0.999992	0.973261	-1.02747	OLZ down vs VEH	0.262929	1	0.999678	1.06151	1.06151	PCP+OLZ up vs PCP	0.998781	1	0.999757	1.00008	1.00008	PCP up vs VEH
37698_at	AKAP1	A kinase (PRKA) anchor protein 1	NM_003488	0.0941315	1	0.741184	0.817501	1	0.999954	0.985224	-1.015	AHA down vs VEH	0.0705368	1	0.81859	0.883973	-1.13126	AOL down vs VEH	0.40234	1	0.574181	1.05576	1.05576	HAL up vs VEH	0.83886	1	0.999992	1.0132	1.0132	OLZ up vs VEH	0.700199	1	0.999678	1.02651	1.02651	PCP+OLZ up vs PCP	0.120642	1	0.999419	0.900008	-1.1111	PCP down vs VEH
40813_at	SLC5A3	solute carrier family 5 (sodium/myo-inositol cotransporter), member 3	NM_006933	0.0944195	1	0.741184	0.521057	1	0.999954	1.0413	1.0413	AHA up vs VEH	0.0446166	1	0.81859	0.874356	-1.1437	AOL down vs VEH	0.250532	1	0.517859	1.07564	1.07564	HAL up vs VEH	0.771541	1	0.999992	0.981893	-1.01844	OLZ down vs VEH	0.745385	1	0.999678	1.02175	1.02175	PCP+OLZ up vs PCP	0.512554	1	0.999419	0.958118	-1.04371	PCP down vs VEH
1677_at	IGFBP5	insulin-like growth factor binding protein 5	NM_000599	0.0944366	1	0.741184	0.821051	1	0.999954	0.988175	-1.01197	AHA down vs VEH	0.021241	1	0.81859	0.878229	-1.13866	AOL down vs VEH	0.673487	1	0.748308	1.02243	1.02243	HAL up vs VEH	0.15304	1	0.999992	0.926679	-1.07912	OLZ down vs VEH	0.256241	1	0.999678	1.06543	1.06543	PCP+OLZ up vs PCP	0.159671	1	0.999419	0.925349	-1.08067	PCP down vs VEH
39794_at	USP8	ubiquitin specific peptidase 8	NM_001128610 /// NM_001128611 /// NM_005154	0.0946718	1	0.741184	0.928938	1	0.999954	1.00523	1.00523	AHA up vs VEH	0.442146	1	0.819966	0.954392	-1.04779	AOL down vs VEH	0.0217266	1	0.514474	1.14918	1.14918	HAL up vs VEH	0.697055	1	0.999992	1.02305	1.02305	OLZ up vs VEH	0.877755	1	0.999678	1.00952	1.00952	PCP+OLZ up vs PCP	0.818793	1	0.999419	0.986215	-1.01398	PCP down vs VEH
351_f_at	SFRS3	splicing factor, arginine/serine-rich 3	NM_003017	0.0947265	1	0.741184	0.171681	1	0.999954	0.895775	-1.11635	AHA down vs VEH	0.240715	1	0.81859	0.907175	-1.10232	AOL down vs VEH	0.8511	1	0.884255	1.01504	1.01504	HAL up vs VEH	0.693097	1	0.999992	0.96907	-1.03192	OLZ down vs VEH	0.0393138	1	0.999678	1.19429	1.19429	PCP+OLZ up vs PCP	0.00868564	1	0.999419	0.797363	-1.25413	PCP down vs VEH
39395_at	THY1	Thy-1 cell surface antigen	NM_006288	0.0947422	1	0.741184	0.397489	1	0.999954	1.04869	1.04869	AHA up vs VEH	0.158294	1	0.81859	0.920611	-1.08624	AOL down vs VEH	0.197789	1	0.514474	1.07554	1.07554	HAL up vs VEH	0.460018	1	0.999992	1.04234	1.04234	OLZ up vs VEH	0.236181	1	0.999678	1.07294	1.07294	PCP+OLZ up vs PCP	0.219669	1	0.999419	0.930706	-1.07445	PCP down vs VEH
32784_at	PRPF4B	PRP4 pre-mRNA processing factor 4 homolog B (yeast)	NM_003913	0.0948626	1	0.741184	0.540477	1	0.999954	1.03916	1.03916	AHA up vs VEH	0.54301	1	0.834851	0.961275	-1.04028	AOL down vs VEH	0.0171347	1	0.514474	1.16773	1.16773	HAL up vs VEH	0.498954	1	0.999992	1.04337	1.04337	OLZ up vs VEH	0.470027	1	0.999678	1.04894	1.04894	PCP+OLZ up vs PCP	0.693738	1	0.999419	0.974763	-1.02589	PCP down vs VEH
33220_at	ZNF187	zinc finger protein 187	NM_001023560 /// NM_001111039 /// NM_152736	0.0952873	1	0.741184	0.892212	1	0.999954	0.991635	-1.00844	AHA down vs VEH	0.286755	1	0.81859	0.933481	-1.07126	AOL down vs VEH	0.106751	1	0.514474	1.10709	1.10709	HAL up vs VEH	0.269526	1	0.999992	0.933325	-1.07144	OLZ down vs VEH	0.84115	1	0.999678	1.01317	1.01317	PCP+OLZ up vs PCP	0.342062	1	0.999419	0.940478	-1.06329	PCP down vs VEH
37354_at	SP100	SP100 nuclear antigen	NM_001080391 /// NM_003113	0.0953072	1	0.741184	0.962578	1	0.999954	0.996949	-1.00306	AHA down vs VEH	0.115575	1	0.81859	0.897822	-1.11381	AOL down vs VEH	0.130635	1	0.514474	1.10511	1.10511	HAL up vs VEH	0.478351	1	0.999992	0.954737	-1.04741	OLZ down vs VEH	0.274748	1	0.999678	0.927302	-1.0784	PCP+OLZ down vs PCP	0.670259	1	0.999419	1.02917	1.02917	PCP up vs VEH
38205_at	NEUROD2	neurogenic differentiation 2	NM_006160	0.0953838	1	0.741184	0.153445	1	0.999954	1.08017	1.08017	AHA up vs VEH	0.235922	1	0.81859	0.936164	-1.06819	AOL down vs VEH	0.0591163	1	0.514474	1.1085	1.1085	HAL up vs VEH	0.382981	1	0.999992	1.04784	1.04784	OLZ up vs VEH	0.455311	1	0.999678	1.04294	1.04294	PCP+OLZ up vs PCP	0.953429	1	0.999419	0.996782	-1.00323	PCP down vs VEH
35201_at	HNRNPL	heterogeneous nuclear ribonucleoprotein L	NM_001005335 /// NM_001533	0.0954117	1	0.741184	0.717968	1	0.999954	1.02372	1.02372	AHA up vs VEH	0.0983224	1	0.81859	0.893207	-1.11956	AOL down vs VEH	0.161201	1	0.514474	1.09641	1.09641	HAL up vs VEH	0.841962	1	0.999992	1.01302	1.01302	OLZ up vs VEH	0.998143	1	0.999707	0.999841	-1.00016	PCP+OLZ down vs PCP	0.414871	1	0.999419	0.946485	-1.05654	PCP down vs VEH
35343_at	GOT1	glutamic-oxaloacetic transaminase 1, soluble (aspartate aminotransferase 1)	NM_002079	0.0955283	1	0.741184	0.477697	1	0.999954	0.948958	-1.05379	AHA down vs VEH	0.201805	1	0.81859	0.906486	-1.10316	AOL down vs VEH	0.253941	1	0.518631	1.08831	1.08831	HAL up vs VEH	0.320025	1	0.999992	1.07639	1.07639	OLZ up vs VEH	0.179629	1	0.999678	1.11089	1.11089	PCP+OLZ up vs PCP	0.169689	1	0.999419	0.899493	-1.11174	PCP down vs VEH
32194_at	CEBPZ	CCAAT/enhancer binding protein (C/EBP), zeta	NM_005760	0.0955869	1	0.741184	0.730342	1	0.999954	1.02453	1.02453	AHA up vs VEH	0.0783541	1	0.81859	0.877527	-1.13957	AOL down vs VEH	0.191274	1	0.514474	1.09732	1.09732	HAL up vs VEH	0.952645	1	0.999992	0.995836	-1.00418	OLZ down vs VEH	0.745161	1	0.999678	0.976226	-1.02435	PCP+OLZ down vs PCP	0.515157	1	0.999419	0.953612	-1.04864	PCP down vs VEH
37359_at	LOC653566 /// SPCS2	signal peptidase complex subunit 2 homolog pseudogene /// signal peptidase compl	NM_014752 /// NR_027268	0.0957111	1	0.741184	0.969463	1	0.999954	1.00196	1.00196	AHA up vs VEH	0.135666	1	0.81859	0.923135	-1.08327	AOL down vs VEH	0.162608	1	0.514474	1.07488	1.07488	HAL up vs VEH	0.585078	1	0.999992	0.972462	-1.02832	OLZ down vs VEH	0.498996	1	0.999678	1.03712	1.03712	PCP+OLZ up vs PCP	0.164717	1	0.999419	0.928293	-1.07725	PCP down vs VEH
37553_at	TESK1	testis-specific kinase 1	NM_006285	0.0960463	1	0.741184	0.415199	1	0.999954	1.05363	1.05363	AHA up vs VEH	0.12436	1	0.81859	0.902042	-1.1086	AOL down vs VEH	0.269	1	0.523653	1.07372	1.07372	HAL up vs VEH	0.439162	1	0.999992	1.05082	1.05082	OLZ up vs VEH	0.308979	1	0.999678	1.07127	1.07127	PCP+OLZ up vs PCP	0.224256	1	0.999419	0.922066	-1.08452	PCP down vs VEH
2077_at	ITGA6	integrin, alpha 6	NM_000210 /// NM_001079818	0.0960833	1	0.741184	0.33631	1	0.999954	1.05616	1.05616	AHA up vs VEH	0.43542	1	0.819966	0.955274	-1.04682	AOL down vs VEH	0.0438152	1	0.514474	1.12412	1.12412	HAL up vs VEH	0.472715	1	0.999992	1.04153	1.04153	OLZ up vs VEH	0.8999	1	0.999678	0.992548	-1.00751	PCP+OLZ down vs PCP	0.721636	1	0.999419	0.979358	-1.02108	PCP down vs VEH
1549_s_at	SERPINB3 /// SERPINB4	serpin peptidase inhibitor, clade B (ovalbumin), member 3 /// serpin peptidase i	NM_002974 /// NM_006919	0.0961544	1	0.741184	0.638972	1	0.999954	0.964815	-1.03647	AHA down vs VEH	0.468636	1	0.821908	0.944253	-1.05904	AOL down vs VEH	0.0650732	1	0.514474	1.15475	1.15475	HAL up vs VEH	0.81744	1	0.999992	0.982549	-1.01776	OLZ down vs VEH	0.220308	1	0.999678	0.905403	-1.10448	PCP+OLZ down vs PCP	0.894085	1	0.999419	1.01057	1.01057	PCP up vs VEH
32324_at	YWHAB	tyrosine 3-monooxygenase/tryptophan 5-monooxygenase activation protein, beta pol	NM_003404 /// NM_139323	0.0961719	1	0.741184	0.190037	1	0.999954	1.0773	1.0773	AHA up vs VEH	0.54794	1	0.835303	0.965604	-1.03562	AOL down vs VEH	0.0485639	1	0.514474	1.12044	1.12044	HAL up vs VEH	0.0505603	1	0.999992	1.11927	1.11927	OLZ up vs VEH	0.201813	1	0.999678	1.0793	1.0793	PCP+OLZ up vs PCP	0.878713	1	0.999419	1.00892	1.00892	PCP up vs VEH
37995_s_at	FMR1	fragile X mental retardation 1	NM_002024	0.0961726	1	0.741184	0.851177	1	0.999954	1.0114	1.0114	AHA up vs VEH	0.124725	1	0.81859	0.907118	-1.10239	AOL down vs VEH	0.266786	1	0.523461	1.06998	1.06998	HAL up vs VEH	0.291231	1	0.999992	0.937781	-1.06635	OLZ down vs VEH	0.985069	1	0.999678	0.99881	-1.00119	PCP+OLZ down vs PCP	0.236305	1	0.999419	0.927927	-1.07767	PCP down vs VEH
40213_at	SMARCA1	SWI/SNF related, matrix associated, actin dependent regulator of chromatin, subf	NM_003069 /// NM_139035	0.09622	1	0.741184	0.239018	1	0.999954	1.09889	1.09889	AHA up vs VEH	0.899237	1	0.962514	1.01045	1.01045	AOL up vs VEH	0.0303655	1	0.514474	1.19401	1.19401	HAL up vs VEH	0.318472	1	0.999992	1.08295	1.08295	OLZ up vs VEH	0.344709	1	0.999678	1.08265	1.08265	PCP+OLZ up vs PCP	0.371437	1	0.999419	0.928811	-1.07665	PCP down vs VEH
39082_at	ANXA6	annexin A6	NM_001155 /// NM_004033	0.0963327	1	0.741184	0.821926	1	0.999954	1.01223	1.01223	AHA up vs VEH	0.0268794	1	0.81859	0.880016	-1.13634	AOL down vs VEH	0.506361	1	0.632281	1.03665	1.03665	HAL up vs VEH	0.608922	1	0.999992	1.02807	1.02807	OLZ up vs VEH	0.821642	1	0.999678	0.987258	-1.01291	PCP+OLZ down vs PCP	0.5717	1	0.999419	0.968792	-1.03221	PCP down vs VEH
1008_f_at	EIF2AK2	eukaryotic translation initiation factor 2-alpha kinase 2	NM_001135651 /// NM_001135652 /// NM_002759	0.0963839	1	0.741184	0.11528	1	0.999954	0.903669	-1.1066	AHA down vs VEH	0.399208	1	0.819966	0.946073	-1.057	AOL down vs VEH	0.387383	1	0.567442	1.05649	1.05649	HAL up vs VEH	0.767393	1	0.999992	0.981452	-1.0189	OLZ down vs VEH	0.0421297	1	0.999678	1.1493	1.1493	PCP+OLZ up vs PCP	0.0766429	1	0.999419	0.888283	-1.12577	PCP down vs VEH
34401_at	UQCRFS1	ubiquinol-cytochrome c reductase, Rieske iron-sulfur polypeptide 1	NM_006003	0.0964058	1	0.741184	0.0239163	1	0.999954	1.13855	1.13855	AHA up vs VEH	0.994672	1	0.996698	0.999617	-1.00038	AOL down vs VEH	0.0167683	1	0.514474	1.14797	1.14797	HAL up vs VEH	0.343995	1	0.999992	1.05427	1.05427	OLZ up vs VEH	0.991852	1	0.999678	0.999403	-1.0006	PCP+OLZ down vs PCP	0.477057	1	0.999419	1.04188	1.04188	PCP up vs VEH
34454_r_at	APOC4	apolipoprotein C-IV	NM_001646	0.096639	1	0.741184	0.741853	1	0.999954	1.0171	1.0171	AHA up vs VEH	0.18168	1	0.81859	0.930601	-1.07457	AOL down vs VEH	0.124938	1	0.514474	1.08348	1.08348	HAL up vs VEH	0.859589	1	0.999992	1.00914	1.00914	OLZ up vs VEH	0.0702923	1	0.999678	1.10539	1.10539	PCP+OLZ up vs PCP	0.197611	1	0.999419	0.932951	-1.07187	PCP down vs VEH
40541_at	ASS1	argininosuccinate synthetase 1	NM_000050 /// NM_054012	0.0968265	1	0.741184	0.40489	1	0.999954	1.05104	1.05104	AHA up vs VEH	0.71575	1	0.895058	0.977816	-1.02269	AOL down vs VEH	0.0618938	1	0.514474	1.12042	1.12042	HAL up vs VEH	0.839702	1	0.999992	0.988035	-1.01211	OLZ down vs VEH	0.694033	1	0.999678	0.975635	-1.02497	PCP+OLZ down vs PCP	0.573853	1	0.999419	0.965868	-1.03534	PCP down vs VEH
34372_at	HUWE1	HECT, UBA and WWE domain containing 1	NM_031407	0.096947	1	0.741184	0.600252	1	0.999954	1.03155	1.03155	AHA up vs VEH	0.112929	1	0.81859	0.90604	-1.1037	AOL down vs VEH	0.358065	1	0.553792	1.0562	1.0562	HAL up vs VEH	0.404469	1	0.999992	1.0508	1.0508	OLZ up vs VEH	0.679106	1	0.999678	1.02613	1.02613	PCP+OLZ up vs PCP	0.237075	1	0.999419	0.92948	-1.07587	PCP down vs VEH
1459_at	PTPN4	protein tyrosine phosphatase, non-receptor type 4 (megakaryocyte)	NM_002830	0.0969659	1	0.741184	0.168145	1	0.999954	0.901683	-1.10904	AHA down vs VEH	0.0451596	1	0.81859	0.853971	-1.171	AOL down vs VEH	0.771341	1	0.822637	1.02179	1.02179	HAL up vs VEH	0.62407	1	0.999992	1.03707	1.03707	OLZ up vs VEH	0.660746	1	0.999678	1.0349	1.0349	PCP+OLZ up vs PCP	0.150963	1	0.999419	0.894204	-1.11831	PCP down vs VEH
33323_r_at	SFN	stratifin	NM_006142	0.0969889	1	0.741184	0.173171	1	0.999954	1.08358	1.08358	AHA up vs VEH	0.770373	1	0.912991	0.982567	-1.01774	AOL down vs VEH	0.0254159	1	0.514474	1.14401	1.14401	HAL up vs VEH	0.567528	1	0.999992	1.03391	1.03391	OLZ up vs VEH	0.669643	1	0.999678	0.974163	-1.02652	PCP+OLZ down vs PCP	0.96027	1	0.999419	1.00301	1.00301	PCP up vs VEH
39343_at	TRA2A	transformer 2 alpha homolog (Drosophila)	NM_013293	0.097132	1	0.741184	0.32434	1	0.999954	0.945491	-1.05765	AHA down vs VEH	0.027887	1	0.81859	0.87565	-1.14201	AOL down vs VEH	0.595398	1	0.69022	1.03052	1.03052	HAL up vs VEH	0.502284	1	0.999992	0.962691	-1.03875	OLZ down vs VEH	0.401885	1	0.999678	1.05138	1.05138	PCP+OLZ up vs PCP	0.0572545	1	0.999419	0.892253	-1.12076	PCP down vs VEH
39715_at	CBX5	chromobox homolog 5 (HP1 alpha homolog, Drosophila)	NM_001127321 /// NM_001127322 /// NM_012117	0.0971917	1	0.741184	0.435187	1	0.999954	1.06022	1.06022	AHA up vs VEH	0.197714	1	0.81859	0.904329	-1.10579	AOL down vs VEH	0.0726028	1	0.514474	1.14672	1.14672	HAL up vs VEH	0.602099	1	0.999992	1.03975	1.03975	OLZ up vs VEH	0.935132	1	0.999678	0.993625	-1.00642	PCP+OLZ down vs PCP	0.711145	1	0.999419	0.971756	-1.02907	PCP down vs VEH
37376_at	UBXN1	UBX domain protein 1	NM_015853	0.0972124	1	0.741184	0.641829	1	0.999954	1.02771	1.02771	AHA up vs VEH	0.617065	1	0.859928	0.970054	-1.03087	AOL down vs VEH	0.052165	1	0.514474	1.12395	1.12395	HAL up vs VEH	0.309967	1	0.999992	1.06182	1.06182	OLZ up vs VEH	0.476528	1	0.999678	1.04512	1.04512	PCP+OLZ up vs PCP	0.31718	1	0.999419	0.940638	-1.06311	PCP down vs VEH
35435_s_at	HADH	hydroxyacyl-Coenzyme A dehydrogenase	NM_005327	0.0972868	1	0.741184	0.254855	1	0.999954	1.0708	1.0708	AHA up vs VEH	0.215635	1	0.81859	0.925813	-1.08013	AOL down vs VEH	0.0608603	1	0.514474	1.1211	1.1211	HAL up vs VEH	0.996705	1	0.999992	1.00025	1.00025	OLZ up vs VEH	0.899353	1	0.999678	1.00796	1.00796	PCP+OLZ up vs PCP	0.898781	1	0.999419	0.992183	-1.00788	PCP down vs VEH
1907_at	RBL1	retinoblastoma-like 1 (p107)	NM_002895 /// NM_183404	0.0973397	1	0.741184	0.656451	1	0.999954	1.03095	1.03095	AHA up vs VEH	0.776274	1	0.913626	0.980068	-1.02034	AOL down vs VEH	0.063682	1	0.514474	1.13869	1.13869	HAL up vs VEH	0.950417	1	0.999992	0.995753	-1.00427	OLZ down vs VEH	0.798121	1	0.999678	1.01861	1.01861	PCP+OLZ up vs PCP	0.272223	1	0.999419	0.924537	-1.08162	PCP down vs VEH
34228_r_at	PRG4	proteoglycan 4	NM_001127708 /// NM_001127709 /// NM_001127710 /// NM_005807	0.0974807	1	0.741184	0.0930933	1	0.999954	1.09559	1.09559	AHA up vs VEH	0.143246	1	0.81859	1.0854	1.0854	AOL up vs VEH	0.0055853	1	0.514474	1.16849	1.16849	HAL up vs VEH	0.668947	1	0.999992	1.0231	1.0231	OLZ up vs VEH	0.454926	1	0.999678	0.958751	-1.04302	PCP+OLZ down vs PCP	0.149968	1	0.999419	1.08399	1.08399	PCP up vs VEH
1852_at	TNF	tumor necrosis factor (TNF superfamily, member 2)	NM_000594	0.0975467	1	0.741184	0.530069	1	0.999954	1.03813	1.03813	AHA up vs VEH	0.282964	1	0.81859	0.93562	-1.06881	AOL down vs VEH	0.0414318	1	0.514474	1.13276	1.13276	HAL up vs VEH	0.923399	1	0.999992	1.00573	1.00573	OLZ up vs VEH	0.840102	1	0.999678	0.987448	-1.01271	PCP+OLZ down vs PCP	0.845021	1	0.999419	0.988033	-1.01211	PCP down vs VEH
41429_at	PPP2R1B	protein phosphatase 2 (formerly 2A), regulatory subunit A, beta isoform	NM_002716 /// NM_181699	0.097696	1	0.741184	0.228643	1	0.999954	1.06206	1.06206	AHA up vs VEH	0.658371	1	0.871069	0.977567	-1.02295	AOL down vs VEH	0.0325602	1	0.514474	1.11536	1.11536	HAL up vs VEH	0.912121	1	0.999992	0.994548	-1.00548	OLZ down vs VEH	0.203867	1	0.999678	0.935213	-1.06927	PCP+OLZ down vs PCP	0.294579	1	0.999419	1.05566	1.05566	PCP up vs VEH
128_at	CTSK	cathepsin K	NM_000396	0.0977863	1	0.741184	0.652771	1	0.999954	0.968764	-1.03224	AHA down vs VEH	0.0880265	1	0.81859	0.880944	-1.13515	AOL down vs VEH	0.448938	1	0.597547	1.055	1.055	HAL up vs VEH	0.620666	1	0.999992	0.965686	-1.03553	OLZ down vs VEH	0.909647	1	0.999678	1.00845	1.00845	PCP+OLZ up vs PCP	0.0878268	1	0.999419	0.880746	-1.1354	PCP down vs VEH
40023_at	BDNF	brain-derived neurotrophic factor	NM_001143805 /// NM_001143806 /// NM_001143807 /// NM_001143808 /// NM_001143809	0.0978375	1	0.741184	0.418475	1	0.999954	1.04447	1.04447	AHA up vs VEH	0.667626	1	0.87585	0.976468	-1.0241	AOL down vs VEH	0.215552	1	0.514474	1.06928	1.06928	HAL up vs VEH	0.225255	1	0.999992	1.06776	1.06776	OLZ up vs VEH	0.846553	1	0.999678	1.01097	1.01097	PCP+OLZ up vs PCP	0.0448104	1	0.999419	1.12109	1.12109	PCP up vs VEH
33677_at	RPL24	ribosomal protein L24	NM_000986	0.0979593	1	0.741184	0.463938	1	0.999954	1.03987	1.03987	AHA up vs VEH	0.904023	1	0.96375	0.993386	-1.00666	AOL down vs VEH	0.0105445	1	0.514474	1.15277	1.15277	HAL up vs VEH	0.417984	1	0.999992	1.04422	1.04422	OLZ up vs VEH	0.707651	1	0.999678	1.02124	1.02124	PCP+OLZ up vs PCP	0.849064	1	0.999419	0.989568	-1.01054	PCP down vs VEH
32334_f_at	UBC	ubiquitin C	NM_021009	0.0980942	1	0.741184	0.61809	1	0.999954	1.02552	1.02552	AHA up vs VEH	0.968672	1	0.988548	0.997952	-1.00205	AOL down vs VEH	0.0549255	1	0.514474	1.10436	1.10436	HAL up vs VEH	0.375895	1	0.999992	1.04593	1.04593	OLZ up vs VEH	0.0201662	1	0.999678	1.13653	1.13653	PCP+OLZ up vs PCP	0.217487	1	0.999419	0.93697	-1.06727	PCP down vs VEH
1104_s_at	HSPA1A /// HSPA1B	heat shock 70kDa protein 1A /// heat shock 70kDa protein 1B	NM_005345 /// NM_005346	0.0981838	1	0.741184	0.705406	1	0.999954	0.976577	-1.02398	AHA down vs VEH	0.0108022	1	0.81859	0.841486	-1.18837	AOL down vs VEH	0.694875	1	0.764799	0.975706	-1.0249	HAL down vs VEH	0.785894	1	0.999992	0.983121	-1.01717	OLZ down vs VEH	0.282956	1	0.999678	1.07396	1.07396	PCP+OLZ up vs PCP	0.0471769	1	0.999419	0.876159	-1.14135	PCP down vs VEH
41599_at	GATA6	GATA binding protein 6	NM_005257	0.0982722	1	0.741184	0.324832	1	0.999954	1.06197	1.06197	AHA up vs VEH	0.15071	1	0.81859	0.912596	-1.09577	AOL down vs VEH	0.131303	1	0.514474	1.09742	1.09742	HAL up vs VEH	0.768394	1	0.999992	0.982281	-1.01804	OLZ down vs VEH	0.712578	1	0.999678	0.97672	-1.02383	PCP+OLZ down vs PCP	0.809121	1	0.999419	0.984928	-1.0153	PCP down vs VEH
33863_at	HYOU1	hypoxia up-regulated 1	NM_001130991 /// NM_006389	0.0985778	1	0.741184	0.601664	1	0.999954	1.03159	1.03159	AHA up vs VEH	0.294152	1	0.81859	0.937044	-1.06719	AOL down vs VEH	0.0646997	1	0.514474	1.11897	1.11897	HAL up vs VEH	0.676295	1	0.999992	1.02517	1.02517	OLZ up vs VEH	0.84846	1	0.999678	1.01204	1.01204	PCP+OLZ up vs PCP	0.443702	1	0.999419	0.953737	-1.04851	PCP down vs VEH
38527_at	NONO	non-POU domain containing, octamer-binding	NM_001145408 /// NM_001145409 /// NM_001145410 /// NM_007363	0.0986072	1	0.741184	0.904444	1	0.999954	1.00751	1.00751	AHA up vs VEH	0.107615	1	0.81859	0.899828	-1.11132	AOL down vs VEH	0.373381	1	0.560566	1.05735	1.05735	HAL up vs VEH	0.805433	1	0.999992	1.01548	1.01548	OLZ up vs VEH	0.124615	1	0.999678	1.10778	1.10778	PCP+OLZ up vs PCP	0.061897	1	0.999419	0.883946	-1.13129	PCP down vs VEH
1389_at	MME	membrane metallo-endopeptidase	NM_000902 /// NM_007287 /// NM_007288 /// NM_007289	0.0986683	1	0.741184	0.555914	1	0.999954	1.03023	1.03023	AHA up vs VEH	0.363182	1	0.81859	0.953392	-1.04889	AOL down vs VEH	0.0698848	1	0.514474	1.098	1.098	HAL up vs VEH	0.830283	1	0.999992	0.989241	-1.01088	OLZ down vs VEH	0.332735	1	0.999678	1.05314	1.05314	PCP+OLZ up vs PCP	0.242189	1	0.999419	0.940185	-1.06362	PCP down vs VEH
40518_at	PTPRC	protein tyrosine phosphatase, receptor type, C	NM_002838 /// NM_080921 /// NM_080922 /// NM_080923	0.0990394	1	0.741184	0.735534	1	0.999954	1.01969	1.01969	AHA up vs VEH	0.0314013	1	0.81859	0.875924	-1.14165	AOL down vs VEH	0.339614	1	0.550154	1.05698	1.05698	HAL up vs VEH	0.8071	1	0.999992	0.986009	-1.01419	OLZ down vs VEH	0.952617	1	0.999678	0.996398	-1.00362	PCP+OLZ down vs PCP	0.485315	1	0.999419	0.95904	-1.04271	PCP down vs VEH
34313_at	NCOA2	nuclear receptor coactivator 2	NM_006540	0.0991317	1	0.741184	0.781632	1	0.999954	1.01496	1.01496	AHA up vs VEH	0.15356	1	0.81859	0.922976	-1.08345	AOL down vs VEH	0.386907	1	0.567442	1.04767	1.04767	HAL up vs VEH	0.0707916	1	0.999992	0.905831	-1.10396	OLZ down vs VEH	0.481154	1	0.999678	0.960932	-1.04066	PCP+OLZ down vs PCP	0.92654	1	0.999419	0.994899	-1.00513	PCP down vs VEH
531_at	GLIPR1	GLI pathogenesis-related 1	NM_006851	0.0991878	1	0.741184	0.742049	1	0.999954	0.980855	-1.01952	AHA down vs VEH	0.401346	1	0.819966	0.950093	-1.05253	AOL down vs VEH	0.466683	1	0.607662	1.0438	1.0438	HAL up vs VEH	0.0949495	1	0.999992	0.904976	-1.105	OLZ down vs VEH	0.192714	1	0.999678	0.921822	-1.08481	PCP+OLZ down vs PCP	0.506167	1	0.999419	0.960279	-1.04136	PCP down vs VEH
36616_at	DAZAP2	DAZ associated protein 2	NM_001136264 /// NM_001136266 /// NM_001136267 /// NM_001136268 /// NM_001136269	0.0992884	1	0.741184	0.956232	1	0.999954	0.996205	-1.00381	AHA down vs VEH	0.182094	1	0.81859	0.907754	-1.10162	AOL down vs VEH	0.0795696	1	0.514474	1.132	1.132	HAL up vs VEH	0.979981	1	0.999992	1.00174	1.00174	OLZ up vs VEH	0.765904	1	0.999678	1.02197	1.02197	PCP+OLZ up vs PCP	0.385873	1	0.999419	0.939382	-1.06453	PCP down vs VEH
31957_r_at	RPLP1	ribosomal protein, large, P1	NM_001003 /// NM_213725	0.0993452	1	0.741184	0.65892	1	0.999954	1.02213	1.02213	AHA up vs VEH	0.803333	1	0.924373	0.987317	-1.01285	AOL down vs VEH	0.0200235	1	0.514474	1.12688	1.12688	HAL up vs VEH	0.675907	1	0.999992	1.02094	1.02094	OLZ up vs VEH	0.42272	1	0.999678	1.04287	1.04287	PCP+OLZ up vs PCP	0.458826	1	0.999419	0.962584	-1.03887	PCP down vs VEH
34729_at	TRO	trophinin	NM_001039705 /// NM_016157 /// NM_177556	0.0993784	1	0.741184	0.834401	1	0.999954	0.987007	-1.01316	AHA down vs VEH	0.0325737	1	0.81859	0.8671	-1.15327	AOL down vs VEH	0.331182	1	0.54709	1.06307	1.06307	HAL up vs VEH	0.534655	1	0.999992	0.961816	-1.0397	OLZ down vs VEH	0.579201	1	0.999678	0.964072	-1.03727	PCP+OLZ down vs PCP	0.554042	1	0.999419	0.96231	-1.03917	PCP down vs VEH
35225_at	ZNF76	zinc finger protein 76 (expressed in testis)	NM_003427	0.0996677	1	0.741184	0.82891	1	0.999954	1.01102	1.01102	AHA up vs VEH	0.0585164	1	0.81859	0.903349	-1.10699	AOL down vs VEH	0.310687	1	0.536392	1.05312	1.05312	HAL up vs VEH	0.505902	1	0.999992	0.966737	-1.03441	OLZ down vs VEH	0.133868	1	0.999678	1.08462	1.08462	PCP+OLZ up vs PCP	0.197911	1	0.999419	0.933918	-1.07076	PCP down vs VEH
1449_at	PSMA4	proteasome (prosome, macropain) subunit, alpha type, 4	NM_001102667 /// NM_001102668 /// NM_002789	0.0997948	1	0.741184	0.793581	1	0.999954	1.01919	1.01919	AHA up vs VEH	0.203617	1	0.81859	0.907971	-1.10136	AOL down vs VEH	0.0761149	1	0.514474	1.14058	1.14058	HAL up vs VEH	0.532053	1	0.999992	1.04654	1.04654	OLZ up vs VEH	0.615373	1	0.999678	1.03922	1.03922	PCP+OLZ up vs PCP	0.414475	1	0.999419	0.940215	-1.06359	PCP down vs VEH
1541_f_at	IFNA6	interferon, alpha 6	NM_021002	0.0998539	1	0.741184	0.232377	1	0.999954	1.0813	1.0813	AHA up vs VEH	0.77432	1	0.913424	0.980942	-1.01943	AOL down vs VEH	0.0248259	1	0.514474	1.16241	1.16241	HAL up vs VEH	0.829852	1	0.999992	1.01403	1.01403	OLZ up vs VEH	0.934241	1	0.999678	0.994384	-1.00565	PCP+OLZ down vs PCP	0.830432	1	0.999419	0.985719	-1.01449	PCP down vs VEH
31315_at	IGL@	Immunoglobulin lambda locus	---	0.100043	1	0.741184	0.157333	1	0.999954	1.08954	1.08954	AHA up vs VEH	0.644421	1	0.867582	0.971792	-1.02903	AOL down vs VEH	0.0783862	1	0.514474	1.11353	1.11353	HAL up vs VEH	0.77356	1	0.999992	0.982921	-1.01738	OLZ down vs VEH	0.105675	1	0.999678	0.901465	-1.10931	PCP+OLZ down vs PCP	0.186516	1	0.999419	1.08636	1.08636	PCP up vs VEH
491_at	PTPRG	protein tyrosine phosphatase, receptor type, G	NM_002841	0.100056	1	0.741184	0.714554	1	0.999954	1.02085	1.02085	AHA up vs VEH	0.147527	1	0.81859	0.917896	-1.08945	AOL down vs VEH	0.157855	1	0.514474	1.08404	1.08404	HAL up vs VEH	0.627557	1	0.999992	0.972976	-1.02777	OLZ down vs VEH	0.276165	1	0.999678	0.936924	-1.06732	PCP+OLZ down vs PCP	0.943863	1	0.999419	0.995896	-1.00412	PCP down vs VEH
31899_at	TTC35	tetratricopeptide repeat domain 35	NM_014673	0.100074	1	0.741184	0.867871	1	0.999954	1.01116	1.01116	AHA up vs VEH	0.328443	1	0.81859	0.93438	-1.07023	AOL down vs VEH	0.0737103	1	0.514474	1.12962	1.12962	HAL up vs VEH	0.873807	1	0.999992	1.01065	1.01065	OLZ up vs VEH	0.435049	1	0.999678	1.05659	1.05659	PCP+OLZ up vs PCP	0.222287	1	0.999419	0.918362	-1.08889	PCP down vs VEH
40995_at	NEFL	neurofilament, light polypeptide	NM_006158	0.100092	1	0.741184	0.067971	1	0.999954	0.8582	-1.16523	AHA down vs VEH	0.0516136	1	0.81859	0.844316	-1.18439	AOL down vs VEH	0.643983	1	0.725243	0.962792	-1.03865	HAL down vs VEH	0.967323	1	0.999992	0.996649	-1.00336	OLZ down vs VEH	0.105787	1	0.999678	1.15256	1.15256	PCP+OLZ up vs PCP	0.0242984	1	0.999419	0.820556	-1.21869	PCP down vs VEH
35759_at	CCT2	chaperonin containing TCP1, subunit 2 (beta)	NM_006431	0.100104	1	0.741184	0.563897	1	0.999954	1.03839	1.03839	AHA up vs VEH	0.254914	1	0.81859	0.925536	-1.08046	AOL down vs VEH	0.051142	1	0.514474	1.13918	1.13918	HAL up vs VEH	0.501734	1	0.999992	1.04486	1.04486	OLZ up vs VEH	0.713796	1	0.999678	1.02549	1.02549	PCP+OLZ up vs PCP	0.585522	1	0.999419	0.96381	-1.03755	PCP down vs VEH
783_at	WWP1	WW domain containing E3 ubiquitin protein ligase 1	NM_007013	0.100185	1	0.741184	0.542589	1	0.999954	0.96456	-1.03674	AHA down vs VEH	0.240531	1	0.81859	0.930121	-1.07513	AOL down vs VEH	0.333994	1	0.547754	1.05915	1.05915	HAL up vs VEH	0.504229	1	0.999992	1.04039	1.04039	OLZ up vs VEH	0.0446712	1	0.999678	1.13699	1.13699	PCP+OLZ up vs PCP	0.0694569	1	0.999419	0.892585	-1.12034	PCP down vs VEH
40156_at	KIAA0040	KIAA0040	NM_001162893 /// NM_001162894 /// NM_001162895 /// NM_014656 /// NR_015350	0.100252	1	0.741184	0.491837	1	0.999954	1.04085	1.04085	AHA up vs VEH	0.720284	1	0.897429	0.978704	-1.02176	AOL down vs VEH	0.0439644	1	0.514474	1.1277	1.1277	HAL up vs VEH	0.820764	1	0.999992	0.986928	-1.01324	OLZ down vs VEH	0.362529	1	0.999678	0.945571	-1.05756	PCP+OLZ down vs PCP	0.997713	1	0.999757	1.00017	1.00017	PCP up vs VEH
41241_at	NARS	asparaginyl-tRNA synthetase	NM_004539	0.100318	1	0.741184	0.690895	1	0.999954	1.01937	1.01937	AHA up vs VEH	0.389559	1	0.819966	0.957807	-1.04405	AOL down vs VEH	0.142981	1	0.514474	1.07423	1.07423	HAL up vs VEH	0.469687	1	0.999992	0.965642	-1.03558	OLZ down vs VEH	0.0423353	1	0.999678	1.1117	1.1117	PCP+OLZ up vs PCP	0.180555	1	0.999419	0.934597	-1.06998	PCP down vs VEH
1124_at	MLL	myeloid/lymphoid or mixed-lineage leukemia (trithorax homolog, Drosophila)	NM_005933	0.100553	1	0.741184	0.633436	1	0.999954	1.02713	1.02713	AHA up vs VEH	0.237727	1	0.81859	0.933231	-1.07155	AOL down vs VEH	0.304811	1	0.534593	1.05963	1.05963	HAL up vs VEH	0.51474	1	0.999992	0.964046	-1.03729	OLZ down vs VEH	0.361763	1	0.999678	1.05561	1.05561	PCP+OLZ up vs PCP	0.0743923	1	0.999419	0.8996	-1.11161	PCP down vs VEH
37880_at	AGXT	alanine-glyoxylate aminotransferase	NM_000030	0.100562	1	0.741184	0.386	1	0.999954	1.04335	1.04335	AHA up vs VEH	0.0862596	1	0.81859	0.915612	-1.09217	AOL down vs VEH	0.152581	1	0.514474	1.07319	1.07319	HAL up vs VEH	0.710846	1	0.999992	0.98209	-1.01824	OLZ down vs VEH	0.786624	1	0.999678	0.986208	-1.01398	PCP+OLZ down vs PCP	0.882619	1	0.999419	1.00748	1.00748	PCP up vs VEH
1731_at	PDGFRA	platelet-derived growth factor receptor, alpha polypeptide	NM_006206	0.100657	1	0.741184	0.724211	1	0.999954	1.01864	1.01864	AHA up vs VEH	0.0556524	1	0.81859	0.899333	-1.11193	AOL down vs VEH	0.416872	1	0.579867	1.04356	1.04356	HAL up vs VEH	0.441454	1	0.999992	0.960398	-1.04124	OLZ down vs VEH	0.239052	1	0.999678	0.936676	-1.0676	PCP+OLZ down vs PCP	0.886469	1	0.999419	0.992296	-1.00776	PCP down vs VEH
40418_at	RBBP4	retinoblastoma binding protein 4	NM_001135255 /// NM_001135256 /// NM_005610	0.100665	1	0.741184	0.0576059	1	0.999954	1.09307	1.09307	AHA up vs VEH	0.960891	1	0.985794	1.00232	1.00232	AOL up vs VEH	0.0103874	1	0.514474	1.13039	1.13039	HAL up vs VEH	0.195479	1	0.999992	1.06172	1.06172	OLZ up vs VEH	0.537248	1	0.999678	0.970645	-1.03024	PCP+OLZ down vs PCP	0.290267	1	0.999419	1.05179	1.05179	PCP up vs VEH
32542_at	FHL1	four and a half LIM domains 1	NM_001159699 /// NM_001159700 /// NM_001159701 /// NM_001159702 /// NM_001159703	0.100667	1	0.741184	0.765696	1	0.999954	0.982553	-1.01776	AHA down vs VEH	0.540784	1	0.834706	0.963247	-1.03815	AOL down vs VEH	0.0356319	1	0.514474	1.13628	1.13628	HAL up vs VEH	0.801867	1	0.999992	1.01493	1.01493	OLZ up vs VEH	0.809496	1	0.999678	0.985124	-1.0151	PCP+OLZ down vs PCP	0.710597	1	0.999419	0.977549	-1.02297	PCP down vs VEH
1795_g_at	CCND3	cyclin D3	NM_001136017 /// NM_001136125 /// NM_001136126 /// NM_001760	0.100669	1	0.741184	0.992765	1	0.999954	1.00054	1.00054	AHA up vs VEH	0.0943953	1	0.81859	0.901176	-1.10966	AOL down vs VEH	0.221303	1	0.514735	1.07563	1.07563	HAL up vs VEH	0.920531	1	0.999992	1.00591	1.00591	OLZ up vs VEH	0.864356	1	0.999678	1.01067	1.01067	PCP+OLZ up vs PCP	0.24003	1	0.999419	0.930085	-1.07517	PCP down vs VEH
34893_at	NDUFV2	NADH dehydrogenase (ubiquinone) flavoprotein 2, 24kDa	NM_021074	0.100709	1	0.741184	0.660408	1	0.999954	1.02875	1.02875	AHA up vs VEH	0.484208	1	0.824989	0.954289	-1.0479	AOL down vs VEH	0.0718924	1	0.514474	1.12583	1.12583	HAL up vs VEH	0.149043	1	0.999992	1.09887	1.09887	OLZ up vs VEH	0.233901	1	0.999678	1.08494	1.08494	PCP+OLZ up vs PCP	0.356647	1	0.999419	0.940005	-1.06382	PCP down vs VEH
36207_at	SEC14L1	SEC14-like 1 (S. cerevisiae)	NM_001039573 /// NM_001143998 /// NM_001143999 /// NM_001144001 /// NM_003003	0.100721	1	0.741184	0.609713	1	0.999954	1.03038	1.03038	AHA up vs VEH	0.1919	1	0.81859	0.923196	-1.08319	AOL down vs VEH	0.087932	1	0.514474	1.10719	1.10719	HAL up vs VEH	0.73052	1	0.999992	0.98003	-1.02038	OLZ down vs VEH	0.95289	1	0.999678	1.00365	1.00365	PCP+OLZ up vs PCP	0.50462	1	0.999419	0.960248	-1.0414	PCP down vs VEH
31824_at	ME1	malic enzyme 1, NADP(+)-dependent, cytosolic	NM_002395	0.100808	1	0.741184	0.548495	1	0.999954	1.04592	1.04592	AHA up vs VEH	0.401089	1	0.819966	0.936927	-1.06732	AOL down vs VEH	0.275348	1	0.525108	1.08553	1.08553	HAL up vs VEH	0.796434	1	0.999992	0.98092	-1.01945	OLZ down vs VEH	0.357071	1	0.999678	0.929799	-1.0755	PCP+OLZ down vs PCP	0.429417	1	0.999419	0.940498	-1.06327	PCP down vs VEH
41309_g_at	CTBP1	C-terminal binding protein 1	NM_001012614 /// NM_001328	0.10085	1	0.741184	0.514019	1	0.999954	0.961621	-1.03991	AHA down vs VEH	0.0236252	1	0.81859	0.865088	-1.15595	AOL down vs VEH	0.649274	1	0.729992	1.02761	1.02761	HAL up vs VEH	0.778591	1	0.999992	0.983319	-1.01696	OLZ down vs VEH	0.423314	1	0.999678	1.05193	1.05193	PCP+OLZ up vs PCP	0.0733651	1	0.999419	0.892875	-1.11998	PCP down vs VEH
32689_s_at	PTGER3	prostaglandin E receptor 3 (subtype EP3)	NM_000957 /// NM_001126044 /// NM_198712 /// NM_198713 /// NM_198714 /// NM_1987	0.100934	1	0.741184	0.0379913	1	0.999954	1.12574	1.12574	AHA up vs VEH	0.250918	1	0.81859	1.06871	1.06871	AOL up vs VEH	0.00943315	1	0.514474	1.1626	1.1626	HAL up vs VEH	0.270751	1	0.999992	1.06351	1.06351	OLZ up vs VEH	0.670068	1	0.999678	0.975402	-1.02522	PCP+OLZ down vs PCP	0.490317	1	0.999419	1.04055	1.04055	PCP up vs VEH
41276_at	SAP18	Sin3A-associated protein, 18kDa	NM_005870	0.100946	1	0.741184	0.610807	1	0.999954	1.03438	1.03438	AHA up vs VEH	0.441406	1	0.819966	0.948366	-1.05445	AOL down vs VEH	0.0382515	1	0.514474	1.15189	1.15189	HAL up vs VEH	0.432556	1	0.999992	1.05364	1.05364	OLZ up vs VEH	0.563364	1	0.999678	1.04126	1.04126	PCP+OLZ up vs PCP	0.470015	1	0.999419	0.951434	-1.05105	PCP down vs VEH
254_at	H3F3A /// H3F3B /// LOC440926	H3 histone, family 3A /// H3 histone, family 3B (H3.3B) /// H3 histone, family 3	NM_002107 /// NM_005324 /// NR_002315	0.100956	1	0.741184	0.932913	1	0.999954	1.00705	1.00705	AHA up vs VEH	0.528698	1	0.830526	0.946932	-1.05604	AOL down vs VEH	0.146939	1	0.514474	1.13058	1.13058	HAL up vs VEH	0.311694	1	0.999992	1.08871	1.08871	OLZ up vs VEH	0.452936	1	0.999678	1.06842	1.06842	PCP+OLZ up vs PCP	0.163487	1	0.999419	0.885153	-1.12975	PCP down vs VEH
35873_at	NR6A1	nuclear receptor subfamily 6, group A, member 1	NM_001489 /// NM_033334	0.101011	1	0.741184	0.465072	1	0.999954	1.04346	1.04346	AHA up vs VEH	0.409511	1	0.819966	0.951482	-1.05099	AOL down vs VEH	0.0257381	1	0.514474	1.14316	1.14316	HAL up vs VEH	0.843633	1	0.999992	1.01151	1.01151	OLZ up vs VEH	0.741919	1	0.999678	0.980069	-1.02034	PCP+OLZ down vs PCP	0.913206	1	0.999419	1.00657	1.00657	PCP up vs VEH
37114_at	ZFHX3	zinc finger homeobox 3	NM_006885	0.101045	1	0.741184	0.846379	1	0.999954	1.01087	1.01087	AHA up vs VEH	0.150714	1	0.81859	0.919364	-1.08771	AOL down vs VEH	0.425059	1	0.58309	1.04569	1.04569	HAL up vs VEH	0.206397	1	0.999992	0.931249	-1.07383	OLZ down vs VEH	0.967973	1	0.999678	0.997645	-1.00236	PCP+OLZ down vs PCP	0.1562	1	0.999419	0.920331	-1.08657	PCP down vs VEH
35064_at	TRIM31	tripartite motif-containing 31	NM_007028	0.101086	1	0.741184	0.308952	1	0.999954	1.06201	1.06201	AHA up vs VEH	0.291447	1	0.81859	0.937468	-1.0667	AOL down vs VEH	0.0496	1	0.514474	1.12561	1.12561	HAL up vs VEH	0.922907	1	0.999992	0.994333	-1.0057	OLZ down vs VEH	0.862862	1	0.999678	0.989375	-1.01074	PCP+OLZ down vs PCP	0.950729	1	0.999419	0.996249	-1.00377	PCP down vs VEH
37228_at	PLK1	polo-like kinase 1 (Drosophila)	NM_005030	0.101089	1	0.741184	0.868831	1	0.999954	1.00849	1.00849	AHA up vs VEH	0.0730432	1	0.81859	0.907604	-1.1018	AOL down vs VEH	0.179522	1	0.514474	1.07197	1.07197	HAL up vs VEH	0.586409	1	0.999992	0.972496	-1.02828	OLZ down vs VEH	0.959081	1	0.999678	0.99724	-1.00277	PCP+OLZ down vs PCP	0.456225	1	0.999419	0.961146	-1.04042	PCP down vs VEH
36924_r_at	SCG2	secretogranin II (chromogranin C)	NM_003469	0.101092	1	0.741184	0.0720153	1	0.999954	1.13004	1.13004	AHA up vs VEH	0.496577	1	0.824989	0.954165	-1.04804	AOL down vs VEH	0.0303064	1	0.514474	1.16027	1.16027	HAL up vs VEH	0.654218	1	0.999992	1.03027	1.03027	OLZ up vs VEH	0.811335	1	0.999678	1.01686	1.01686	PCP+OLZ up vs PCP	0.64468	1	0.999419	1.03232	1.03232	PCP up vs VEH
1224_at	PCTK1	PCTAIRE protein kinase 1	NM_006201 /// NM_033018	0.101123	1	0.741184	0.967892	1	0.999954	0.997791	-1.00221	AHA down vs VEH	0.210169	1	0.81859	0.930547	-1.07464	AOL down vs VEH	0.220204	1	0.514735	1.07041	1.07041	HAL up vs VEH	0.367373	1	0.999992	0.951423	-1.05106	OLZ down vs VEH	0.168203	1	0.999678	1.08408	1.08408	PCP+OLZ up vs PCP	0.0758879	1	0.999419	0.901973	-1.10868	PCP down vs VEH
41091_at	BPTF	bromodomain PHD finger transcription factor	NM_004459 /// NM_182641	0.101236	1	0.741184	0.76963	1	0.999954	1.01837	1.01837	AHA up vs VEH	0.0606993	1	0.81859	0.883866	-1.13139	AOL down vs VEH	0.405713	1	0.575476	1.05327	1.05327	HAL up vs VEH	0.772568	1	0.999992	1.01813	1.01813	OLZ up vs VEH	0.261421	1	0.999678	0.928592	-1.0769	PCP+OLZ down vs PCP	0.845955	1	0.999419	0.987572	-1.01258	PCP down vs VEH
40369_f_at	HLA-G	major histocompatibility complex, class I, G	NM_002127	0.101311	1	0.741184	0.796302	1	0.999954	0.985866	-1.01434	AHA down vs VEH	0.929629	1	0.972433	1.00505	1.00505	AOL up vs VEH	0.278243	1	0.52627	1.06209	1.06209	HAL up vs VEH	0.201816	1	0.999992	0.931346	-1.07371	OLZ down vs VEH	0.407422	1	0.999678	1.04948	1.04948	PCP+OLZ up vs PCP	0.0762688	1	0.999419	0.901802	-1.10889	PCP down vs VEH
121_at	PAX8	paired box 8	NM_003466 /// NM_013951 /// NM_013952 /// NM_013953 /// NM_013992	0.10152	1	0.741184	0.696897	1	0.999954	1.02182	1.02182	AHA up vs VEH	0.39284	1	0.819966	0.95202	-1.0504	AOL down vs VEH	0.0411933	1	0.514474	1.12323	1.12323	HAL up vs VEH	0.656375	1	0.999992	1.02497	1.02497	OLZ up vs VEH	0.796304	1	0.999678	1.01516	1.01516	PCP+OLZ up vs PCP	0.507131	1	0.999419	0.96258	-1.03887	PCP down vs VEH
883_s_at	PIM1	pim-1 oncogene	NM_002648	0.101551	1	0.741184	0.28884	1	0.999954	1.06958	1.06958	AHA up vs VEH	0.545685	1	0.835194	0.961321	-1.04023	AOL down vs VEH	0.0400059	1	0.514474	1.14224	1.14224	HAL up vs VEH	0.609856	1	0.999992	1.0327	1.0327	OLZ up vs VEH	0.883716	1	0.999678	1.00974	1.00974	PCP+OLZ up vs PCP	0.598018	1	0.999419	0.966147	-1.03504	PCP down vs VEH
33280_r_at	ACSM3	acyl-CoA synthetase medium-chain family member 3	NM_005622 /// NM_202000	0.101611	1	0.741184	0.892375	1	0.999954	1.0089	1.0089	AHA up vs VEH	0.414121	1	0.819966	0.945925	-1.05717	AOL down vs VEH	0.0651037	1	0.514474	1.13158	1.13158	HAL up vs VEH	0.36284	1	0.999992	0.941824	-1.06177	OLZ down vs VEH	0.296878	1	0.999678	0.930097	-1.07516	PCP+OLZ down vs PCP	0.574096	1	0.999419	1.03895	1.03895	PCP up vs VEH
33385_g_at	CAST	calpastatin	NM_001042440 /// NM_001042441 /// NM_001042442 /// NM_001042443 /// NM_001042444	0.101686	1	0.741184	0.0560218	1	0.999954	0.887429	-1.12685	AHA down vs VEH	0.0202469	1	0.81859	0.859069	-1.16405	AOL down vs VEH	0.908566	1	0.928367	1.00703	1.00703	HAL up vs VEH	0.24917	1	0.999992	0.93155	-1.07348	OLZ down vs VEH	0.626197	1	0.999678	1.03182	1.03182	PCP+OLZ up vs PCP	0.0731879	1	0.999419	0.890801	-1.12258	PCP down vs VEH
37716_at	CD200	CD200 molecule	NM_001004196 /// NM_005944	0.101749	1	0.741184	0.707606	1	0.999954	1.02302	1.02302	AHA up vs VEH	0.204182	1	0.81859	0.922644	-1.08384	AOL down vs VEH	0.137625	1	0.514474	1.09566	1.09566	HAL up vs VEH	0.558357	1	0.999992	1.03621	1.03621	OLZ up vs VEH	0.497071	1	0.999678	1.04444	1.04444	PCP+OLZ up vs PCP	0.226648	1	0.999419	0.926193	-1.07969	PCP down vs VEH
38477_at	DPH1 /// OVCA2	DPH1 homolog (S. cerevisiae) /// ovarian tumor suppressor candidate 2	NM_001383 /// NM_080822	0.101795	1	0.741184	0.706696	1	0.999954	1.02003	1.02003	AHA up vs VEH	0.670878	1	0.876367	0.977087	-1.02345	AOL down vs VEH	0.0307105	1	0.514474	1.12458	1.12458	HAL up vs VEH	0.694257	1	0.999992	1.02094	1.02094	OLZ up vs VEH	0.68807	1	0.999678	1.02253	1.02253	PCP+OLZ up vs PCP	0.440949	1	0.999419	0.958682	-1.0431	PCP down vs VEH
31685_at	FEV	FEV (ETS oncogene family)	NM_017521	0.101888	1	0.741184	0.922314	1	0.999954	0.994725	-1.0053	AHA down vs VEH	0.331308	1	0.81859	0.946626	-1.05638	AOL down vs VEH	0.054247	1	0.514474	1.11295	1.11295	HAL up vs VEH	0.589173	1	0.999992	0.971082	-1.02978	OLZ down vs VEH	0.985861	1	0.999678	1.00101	1.00101	PCP+OLZ up vs PCP	0.565475	1	0.999419	0.968164	-1.03288	PCP down vs VEH
39066_at	MFAP4	microfibrillar-associated protein 4	NM_002404	0.101952	1	0.741184	0.201582	1	0.999954	1.09117	1.09117	AHA up vs VEH	0.636592	1	0.864953	0.967456	-1.03364	AOL down vs VEH	0.030408	1	0.514474	1.16298	1.16298	HAL up vs VEH	0.675652	1	0.999992	1.02872	1.02872	OLZ up vs VEH	0.865899	1	0.999678	0.988053	-1.01209	PCP+OLZ down vs PCP	0.881855	1	0.999419	0.989649	-1.01046	PCP down vs VEH
36589_at	AKR1B1	aldo-keto reductase family 1, member B1 (aldose reductase)	NM_001628	0.102083	1	0.741184	0.0944519	1	0.999954	1.10269	1.10269	AHA up vs VEH	0.861629	1	0.948149	0.989706	-1.0104	AOL down vs VEH	0.0551758	1	0.514474	1.11935	1.11935	HAL up vs VEH	0.362182	1	0.999992	1.05397	1.05397	OLZ up vs VEH	0.947646	1	0.999678	1.00397	1.00397	PCP+OLZ up vs PCP	0.68886	1	0.999419	0.976464	-1.0241	PCP down vs VEH
36517_at	U2AF1	U2 small nuclear RNA auxiliary factor 1	NM_001025203 /// NM_001025204 /// NM_006758	0.102355	1	0.741184	0.538122	1	0.999954	1.03759	1.03759	AHA up vs VEH	0.595962	1	0.854452	0.967679	-1.0334	AOL down vs VEH	0.0936791	1	0.514474	1.10751	1.10751	HAL up vs VEH	0.0863655	1	0.999992	1.11022	1.11022	OLZ up vs VEH	0.356948	1	0.999678	1.06004	1.06004	PCP+OLZ up vs PCP	0.401543	1	0.999419	0.949153	-1.05357	PCP down vs VEH
39337_at	H2AFZ	H2A histone family, member Z	NM_002106	0.102374	1	0.741184	0.708482	1	0.999954	1.02483	1.02483	AHA up vs VEH	0.368613	1	0.81859	0.940558	-1.0632	AOL down vs VEH	0.0653828	1	0.514474	1.13148	1.13148	HAL up vs VEH	0.874417	1	0.999992	1.01041	1.01041	OLZ up vs VEH	0.462644	1	0.999678	1.05217	1.05217	PCP+OLZ up vs PCP	0.256494	1	0.999419	0.925261	-1.08078	PCP down vs VEH
38628_at	KAT2A	K(lysine) acetyltransferase 2A	NM_021078	0.102492	1	0.741184	0.529352	1	0.999954	0.969462	-1.0315	AHA down vs VEH	0.0553942	1	0.81859	0.904929	-1.10506	AOL down vs VEH	0.784185	1	0.833297	1.01357	1.01357	HAL up vs VEH	0.912554	1	0.999992	0.994614	-1.00542	OLZ down vs VEH	0.0731634	1	0.999678	1.09943	1.09943	PCP+OLZ up vs PCP	0.0233949	1	0.999419	0.88734	-1.12696	PCP down vs VEH
41465_at	ZNF148	zinc finger protein 148	NM_021964	0.102577	1	0.741184	0.688047	1	0.999954	1.02633	1.02633	AHA up vs VEH	0.149361	1	0.81859	0.906832	-1.10274	AOL down vs VEH	0.475291	1	0.611433	1.04741	1.04741	HAL up vs VEH	0.441865	1	0.999992	1.05119	1.05119	OLZ up vs VEH	0.321812	1	0.999678	0.934365	-1.07025	PCP+OLZ down vs PCP	0.607368	1	0.999419	0.966115	-1.03507	PCP down vs VEH
38095_i_at	HLA-DPB1	major histocompatibility complex, class II, DP beta 1	NM_002121	0.10268	1	0.741184	0.990672	1	0.999954	1.0008	1.0008	AHA up vs VEH	0.0570887	1	0.81859	0.870901	-1.14824	AOL down vs VEH	0.343753	1	0.552409	1.06746	1.06746	HAL up vs VEH	0.825182	1	0.999992	0.98497	-1.01526	OLZ down vs VEH	0.279221	1	0.999678	0.924323	-1.08187	PCP+OLZ down vs PCP	0.73041	1	0.999419	0.975817	-1.02478	PCP down vs VEH
306_s_at	HMGN1	high-mobility group nucleosome binding domain 1	NM_004965	0.102791	1	0.741184	0.637482	1	0.999954	1.02935	1.02935	AHA up vs VEH	0.567521	1	0.842862	0.964315	-1.03701	AOL down vs VEH	0.117221	1	0.514474	1.10254	1.10254	HAL up vs VEH	0.782927	1	0.999992	0.983245	-1.01704	OLZ down vs VEH	0.297927	1	0.999678	0.934573	-1.07001	PCP+OLZ down vs PCP	0.684566	1	0.999419	0.974509	-1.02616	PCP down vs VEH
31349_at	PPBPL2	pro-platelet basic protein-like 2	NR_026769	0.102899	1	0.741184	0.116208	1	0.999954	1.0822	1.0822	AHA up vs VEH	0.976283	1	0.992189	0.99848	-1.00152	AOL down vs VEH	0.0306201	1	0.514474	1.11668	1.11668	HAL up vs VEH	0.625624	1	0.999992	0.976117	-1.02447	OLZ down vs VEH	0.689057	1	0.999678	0.979355	-1.02108	PCP+OLZ down vs PCP	0.443066	1	0.999419	1.04024	1.04024	PCP up vs VEH
32078_at	NEDD4	neural precursor cell expressed, developmentally down-regulated 4	NM_006154 /// NM_198400	0.103034	1	0.741184	0.239588	1	0.999954	1.08052	1.08052	AHA up vs VEH	0.853507	1	0.944051	0.987611	-1.01254	AOL down vs VEH	0.0226149	1	0.514474	1.16654	1.16654	HAL up vs VEH	0.863213	1	0.999992	1.01131	1.01131	OLZ up vs VEH	0.959105	1	0.999678	0.996484	-1.00353	PCP+OLZ down vs PCP	0.841129	1	0.999419	0.986542	-1.01364	PCP down vs VEH
36737_at	CRYBA4	crystallin, beta A4	NM_001886	0.103169	1	0.741184	0.266723	1	0.999954	1.0631	1.0631	AHA up vs VEH	0.353807	1	0.81859	0.948644	-1.05414	AOL down vs VEH	0.0728648	1	0.514474	1.10534	1.10534	HAL up vs VEH	0.805595	1	0.999992	1.01355	1.01355	OLZ up vs VEH	0.797183	1	0.999678	1.0149	1.0149	PCP+OLZ up vs PCP	0.495492	1	0.999419	0.962043	-1.03946	PCP down vs VEH
37407_s_at	MYH11	myosin, heavy chain 11, smooth muscle	NM_001040113 /// NM_001040114 /// NM_002474 /// NM_022844	0.103187	1	0.741184	0.607957	1	0.999954	1.03183	1.03183	AHA up vs VEH	0.707611	1	0.890482	0.976598	-1.02396	AOL down vs VEH	0.0818937	1	0.514474	1.11432	1.11432	HAL up vs VEH	0.703298	1	0.999992	0.977025	-1.02352	OLZ down vs VEH	0.437984	1	0.999678	0.951243	-1.05126	PCP+OLZ down vs PCP	0.647315	1	0.999419	0.971485	-1.02935	PCP down vs VEH
37839_at	NTRK3	neurotrophic tyrosine kinase, receptor, type 3	NM_001007156 /// NM_001012338 /// NM_002530	0.103364	1	0.741184	0.219921	1	0.999954	1.0695	1.0695	AHA up vs VEH	0.253392	1	0.81859	0.937407	-1.06677	AOL down vs VEH	0.0612483	1	0.514474	1.1095	1.1095	HAL up vs VEH	0.395601	1	0.999992	1.04738	1.04738	OLZ up vs VEH	0.35134	1	0.999678	0.947888	-1.05498	PCP+OLZ down vs PCP	0.330119	1	0.999419	1.05659	1.05659	PCP up vs VEH
40506_s_at	PABPC4	poly(A) binding protein, cytoplasmic 4 (inducible form)	NM_001135653 /// NM_001135654 /// NM_003819	0.103939	1	0.741184	0.629314	1	0.999954	1.02901	1.02901	AHA up vs VEH	0.253619	1	0.81859	0.931951	-1.07302	AOL down vs VEH	0.229951	1	0.516024	1.07433	1.07433	HAL up vs VEH	0.930805	1	0.999992	0.994877	-1.00515	OLZ down vs VEH	0.805487	1	0.999678	1.01546	1.01546	PCP+OLZ up vs PCP	0.160607	1	0.999419	0.916587	-1.091	PCP down vs VEH
35828_at	CRIP2	cysteine-rich protein 2	NM_001312	0.104076	1	0.741184	0.0587652	1	0.999954	1.09983	1.09983	AHA up vs VEH	0.586133	1	0.851327	1.02813	1.02813	AOL up vs VEH	0.00836113	1	0.514474	1.14553	1.14553	HAL up vs VEH	0.15367	1	0.999992	1.07368	1.07368	OLZ up vs VEH	0.46786	1	0.999678	1.03843	1.03843	PCP+OLZ up vs PCP	0.909792	1	0.999419	1.00579	1.00579	PCP up vs VEH
34692_r_at	ARPC4 /// TTLL3	actin related protein 2/3 complex, subunit 4, 20kDa /// tubulin tyrosine ligase-	NM_001024959 /// NM_001024960 /// NM_001025930 /// NM_005718	0.104297	1	0.741184	0.879834	1	0.999954	1.00838	1.00838	AHA up vs VEH	0.153408	1	0.81859	0.920715	-1.08611	AOL down vs VEH	0.345244	1	0.552409	1.05378	1.05378	HAL up vs VEH	0.804118	1	0.999992	0.986404	-1.01378	OLZ down vs VEH	0.113402	1	0.999678	1.09802	1.09802	PCP+OLZ up vs PCP	0.0455644	1	0.999419	0.889264	-1.12453	PCP down vs VEH
1703_g_at	E2F4	E2F transcription factor 4, p107/p130-binding	NM_001950	0.104411	1	0.741184	0.941664	1	0.999954	0.99514	-1.00488	AHA down vs VEH	0.116402	1	0.81859	0.895884	-1.11622	AOL down vs VEH	0.383226	1	0.565429	1.06008	1.06008	HAL up vs VEH	0.694255	1	0.999992	0.974142	-1.02654	OLZ down vs VEH	0.161388	1	0.999678	1.10457	1.10457	PCP+OLZ up vs PCP	0.0429091	1	0.999419	0.866315	-1.15431	PCP down vs VEH
38778_at	OTUD4	OTU domain containing 4	NM_001102653 /// NM_017493 /// NM_199324	0.104428	1	0.741184	0.960765	1	0.999954	0.996894	-1.00312	AHA down vs VEH	0.0599323	1	0.81859	0.881577	-1.13433	AOL down vs VEH	0.225288	1	0.51598	1.08052	1.08052	HAL up vs VEH	0.835964	1	0.999992	1.01318	1.01318	OLZ up vs VEH	0.599719	1	0.999678	0.965599	-1.03563	PCP+OLZ down vs PCP	0.655721	1	0.999419	0.971183	-1.02967	PCP down vs VEH
1247_g_at	PTPRS	protein tyrosine phosphatase, receptor type, S	NM_002850 /// NM_130853 /// NM_130854 /// NM_130855	0.104552	1	0.741184	0.340614	1	0.999954	0.936432	-1.06788	AHA down vs VEH	0.0570226	1	0.81859	0.870925	-1.1482	AOL down vs VEH	0.747013	1	0.803894	0.978129	-1.02236	HAL down vs VEH	0.266781	1	0.999992	0.926164	-1.07972	OLZ down vs VEH	0.0190892	1	0.999678	1.19174	1.19174	PCP+OLZ up vs PCP	0.0090667	1	0.999419	0.823768	-1.21393	PCP down vs VEH
31583_at	RPS8	ribosomal protein S8	NM_001012	0.104739	1	0.741184	0.246348	1	0.999954	1.07669	1.07669	AHA up vs VEH	0.909063	1	0.96421	0.992562	-1.00749	AOL down vs VEH	0.0463912	1	0.514474	1.13794	1.13794	HAL up vs VEH	0.941632	1	0.999992	0.995385	-1.00464	OLZ down vs VEH	0.0818201	1	0.999678	1.12537	1.12537	PCP+OLZ up vs PCP	0.318285	1	0.999419	0.936382	-1.06794	PCP down vs VEH
34726_at	CACNB3	calcium channel, voltage-dependent, beta 3 subunit	NM_000725	0.104758	1	0.741184	0.732663	1	0.999954	1.02244	1.02244	AHA up vs VEH	0.17833	1	0.81859	0.912564	-1.09581	AOL down vs VEH	0.204937	1	0.514474	1.08674	1.08674	HAL up vs VEH	0.651268	1	0.999992	1.02982	1.02982	OLZ up vs VEH	0.974985	1	0.999678	1.00215	1.00215	PCP+OLZ up vs PCP	0.278697	1	0.999419	0.92922	-1.07617	PCP down vs VEH
33559_at	PTK6	PTK6 protein tyrosine kinase 6	NM_005975	0.104904	1	0.741184	0.384769	1	0.999954	1.05173	1.05173	AHA up vs VEH	0.683854	1	0.881156	0.975944	-1.02465	AOL down vs VEH	0.0228851	1	0.514474	1.14571	1.14571	HAL up vs VEH	0.87236	1	0.999992	1.00932	1.00932	OLZ up vs VEH	0.609413	1	0.999678	0.969369	-1.0316	PCP+OLZ down vs PCP	0.921955	1	0.999419	1.00588	1.00588	PCP up vs VEH
936_s_at	D4S234E	DNA segment on chromosome 4 (unique) 234 expressed sequence	NM_001040101 /// NM_014392	0.104933	1	0.741184	0.390237	1	0.999954	0.940688	-1.06305	AHA down vs VEH	0.668595	1	0.87612	0.969087	-1.0319	AOL down vs VEH	0.314761	1	0.53869	1.0743	1.0743	HAL up vs VEH	0.878131	1	0.999992	1.01092	1.01092	OLZ up vs VEH	0.0980622	1	0.999678	1.13385	1.13385	PCP+OLZ up vs PCP	0.0329417	1	0.999419	0.851048	-1.17502	PCP down vs VEH
36998_s_at	ATXN2	ataxin 2	NM_002973	0.104962	1	0.741184	0.953372	1	0.999954	1.00311	1.00311	AHA up vs VEH	0.275528	1	0.81859	0.941473	-1.06217	AOL down vs VEH	0.0673705	1	0.514474	1.1043	1.1043	HAL up vs VEH	0.587035	1	0.999992	1.02928	1.02928	OLZ up vs VEH	0.387148	1	0.999678	1.04973	1.04973	PCP+OLZ up vs PCP	0.31295	1	0.999419	0.94572	-1.05739	PCP down vs VEH
880_at	FKBP1A	FK506 binding protein 1A, 12kDa	NM_000801 /// NM_054014	0.105421	1	0.741184	0.449773	1	0.999954	1.04131	1.04131	AHA up vs VEH	0.16074	1	0.81859	0.924547	-1.08161	AOL down vs VEH	0.112679	1	0.514474	1.08989	1.08989	HAL up vs VEH	0.416014	1	0.999992	1.04455	1.04455	OLZ up vs VEH	0.239608	1	0.999678	1.06895	1.06895	PCP+OLZ up vs PCP	0.432246	1	0.999419	0.957354	-1.04455	PCP down vs VEH
202_at	HSF2	heat shock transcription factor 2	NM_001135564 /// NM_004506	0.105521	1	0.741184	0.590771	1	0.999954	0.966642	-1.03451	AHA down vs VEH	0.202074	1	0.81859	0.919415	-1.08765	AOL down vs VEH	0.164341	1	0.514474	1.09276	1.09276	HAL up vs VEH	0.731244	1	0.999992	1.02188	1.02188	OLZ up vs VEH	0.910078	1	0.999678	0.992539	-1.00752	PCP+OLZ down vs PCP	0.314712	1	0.999419	0.936114	-1.06825	PCP down vs VEH
2092_s_at	SPP1	secreted phosphoprotein 1	NM_000582 /// NM_001040058 /// NM_001040060	0.105571	1	0.741184	0.358109	1	0.999954	1.06866	1.06866	AHA up vs VEH	0.495918	1	0.824989	0.950491	-1.05209	AOL down vs VEH	0.0421443	1	0.514474	1.16197	1.16197	HAL up vs VEH	0.743246	1	0.999992	0.976722	-1.02383	OLZ down vs VEH	0.210531	1	0.999678	1.10045	1.10045	PCP+OLZ up vs PCP	0.97879	1	0.999419	0.998023	-1.00198	PCP down vs VEH
34292_at	TMEM187	transmembrane protein 187	NM_003492	0.105691	1	0.741184	0.955859	1	0.999954	0.996634	-1.00338	AHA down vs VEH	0.242421	1	0.81859	0.928348	-1.07718	AOL down vs VEH	0.218226	1	0.514474	1.07871	1.07871	HAL up vs VEH	0.726964	1	0.999992	1.02152	1.02152	OLZ up vs VEH	0.601945	1	0.999678	1.03408	1.03408	PCP+OLZ up vs PCP	0.125693	1	0.999419	0.906517	-1.10312	PCP down vs VEH
40592_at	IDS	iduronate 2-sulfatase	NM_000202 /// NM_006123	0.105793	1	0.741184	0.28634	1	0.999954	0.93655	-1.06775	AHA down vs VEH	0.179873	1	0.81859	0.91788	-1.08947	AOL down vs VEH	0.416372	1	0.579867	1.05107	1.05107	HAL up vs VEH	0.0567154	1	0.999992	0.887686	-1.12652	OLZ down vs VEH	0.288554	1	0.999678	0.933611	-1.07111	PCP+OLZ down vs PCP	0.89746	1	0.999419	0.991888	-1.00818	PCP down vs VEH
859_at	CYP1B1	cytochrome P450, family 1, subfamily B, polypeptide 1	NM_000104	0.106279	1	0.741184	0.858148	1	0.999954	1.01234	1.01234	AHA up vs VEH	0.679999	1	0.88013	0.971112	-1.02975	AOL down vs VEH	0.133819	1	0.514474	1.11007	1.11007	HAL up vs VEH	0.49716	1	0.999992	0.954344	-1.04784	OLZ down vs VEH	0.491388	1	0.999678	0.951356	-1.05113	PCP+OLZ down vs PCP	0.441398	1	0.999419	0.946553	-1.05646	PCP down vs VEH
37685_at	PICALM	phosphatidylinositol binding clathrin assembly protein	NM_001008660 /// NM_007166	0.106333	1	0.741184	0.713121	1	0.999954	1.02643	1.02643	AHA up vs VEH	0.355341	1	0.81859	0.934098	-1.07055	AOL down vs VEH	0.139453	1	0.514474	1.11216	1.11216	HAL up vs VEH	0.880893	1	0.999992	1.01068	1.01068	OLZ up vs VEH	0.927892	1	0.999678	0.993268	-1.00678	PCP+OLZ down vs PCP	0.279628	1	0.999419	0.923114	-1.08329	PCP down vs VEH
1733_at	BMP6	bone morphogenetic protein 6	NM_001718	0.10684	1	0.741184	0.479842	1	0.999954	1.04222	1.04222	AHA up vs VEH	0.661569	1	0.871629	0.973894	-1.02681	AOL down vs VEH	0.0318306	1	0.514474	1.13786	1.13786	HAL up vs VEH	0.561778	1	0.999992	0.966647	-1.0345	OLZ down vs VEH	0.404739	1	0.999678	0.94989	-1.05275	PCP+OLZ down vs PCP	0.46594	1	0.999419	1.0452	1.0452	PCP up vs VEH
31545_at	RPS18	ribosomal protein S18	NM_022551	0.106967	1	0.741184	0.846166	1	0.999954	1.0104	1.0104	AHA up vs VEH	0.921749	1	0.970403	0.994594	-1.00544	AOL down vs VEH	0.039296	1	0.514474	1.11976	1.11976	HAL up vs VEH	0.563988	1	0.999992	1.03132	1.03132	OLZ up vs VEH	0.151455	1	0.999678	1.08509	1.08509	PCP+OLZ up vs PCP	0.220925	1	0.999419	0.933978	-1.07069	PCP down vs VEH
32783_at	FBLN2	fibulin 2	NM_001004019 /// NM_001998	0.107224	1	0.741184	0.641984	1	0.999954	1.02818	1.02818	AHA up vs VEH	0.386818	1	0.819966	0.947718	-1.05517	AOL down vs VEH	0.142028	1	0.514474	1.09297	1.09297	HAL up vs VEH	0.909089	1	0.999992	1.00684	1.00684	OLZ up vs VEH	0.144118	1	0.999678	1.09756	1.09756	PCP+OLZ up vs PCP	0.0933071	1	0.999419	0.89969	-1.11149	PCP down vs VEH
41490_at	PRPS2	phosphoribosyl pyrophosphate synthetase 2	NM_001039091 /// NM_002765	0.107293	1	0.741184	0.514757	1	0.999954	0.955919	-1.04611	AHA down vs VEH	0.0572986	1	0.81859	0.870183	-1.14918	AOL down vs VEH	0.296362	1	0.532627	1.07529	1.07529	HAL up vs VEH	0.93896	1	0.999992	0.994729	-1.0053	OLZ down vs VEH	0.834023	1	0.999678	1.01535	1.01535	PCP+OLZ up vs PCP	0.220048	1	0.999419	0.915266	-1.09258	PCP down vs VEH
38251_at	MYL6B	myosin, light chain 6B, alkali, smooth muscle and non-muscle	NM_002475	0.107295	1	0.741184	0.188174	1	0.999954	1.07918	1.07918	AHA up vs VEH	0.837539	1	0.935953	0.987928	-1.01222	AOL down vs VEH	0.0393429	1	0.514474	1.12902	1.12902	HAL up vs VEH	0.160673	1	0.999992	1.08476	1.08476	OLZ up vs VEH	0.355054	1	0.999678	1.05765	1.05765	PCP+OLZ up vs PCP	0.511451	1	0.999419	0.961716	-1.03981	PCP down vs VEH
38148_at	CRY1	cryptochrome 1 (photolyase-like)	NM_004075	0.107316	1	0.741184	0.50659	1	0.999954	1.04232	1.04232	AHA up vs VEH	0.0667943	1	0.81859	0.886293	-1.1283	AOL down vs VEH	0.226886	1	0.516024	1.0789	1.0789	HAL up vs VEH	0.756585	1	0.999992	0.980883	-1.01949	OLZ down vs VEH	0.37979	1	0.999678	0.943799	-1.05955	PCP+OLZ down vs PCP	0.636967	1	0.999419	1.03093	1.03093	PCP up vs VEH
35691_r_at	NFIX	nuclear factor I/X (CCAAT-binding transcription factor)	NM_002501	0.107354	1	0.741184	0.681024	1	0.999954	0.975918	-1.02468	AHA down vs VEH	0.223029	1	0.81859	0.927355	-1.07834	AOL down vs VEH	0.19335	1	0.514474	1.08104	1.08104	HAL up vs VEH	0.960719	1	0.999992	1.00292	1.00292	OLZ up vs VEH	0.0814961	1	0.999678	1.11725	1.11725	PCP+OLZ up vs PCP	0.0783946	1	0.999419	0.895611	-1.11656	PCP down vs VEH
38800_at	STMN2	stathmin-like 2	NM_007029	0.107487	1	0.741184	0.538936	1	0.999954	1.03797	1.03797	AHA up vs VEH	0.878767	1	0.955474	0.990497	-1.00959	AOL down vs VEH	0.0389721	1	0.514474	1.13715	1.13715	HAL up vs VEH	0.0233263	1	0.999992	1.15263	1.15263	OLZ up vs VEH	0.544122	1	0.999678	1.03949	1.03949	PCP+OLZ up vs PCP	0.825791	1	0.999419	1.01389	1.01389	PCP up vs VEH
31587_at	SLC14A2	solute carrier family 14 (urea transporter), member 2	NM_007163	0.107493	1	0.741184	0.516135	1	0.999954	1.03549	1.03549	AHA up vs VEH	0.698416	1	0.886845	0.978741	-1.02172	AOL down vs VEH	0.064328	1	0.514474	1.10668	1.10668	HAL up vs VEH	0.363972	1	0.999992	0.952291	-1.0501	OLZ down vs VEH	0.247883	1	0.999678	0.936381	-1.06794	PCP+OLZ down vs PCP	0.555295	1	0.999419	1.03334	1.03334	PCP up vs VEH
39533_at	SLC7A6	solute carrier family 7 (cationic amino acid transporter, y+ system), member 6	NM_001076785 /// NM_003983	0.107998	1	0.741184	0.61472	1	0.999954	1.04011	1.04011	AHA up vs VEH	0.128834	1	0.81859	0.882982	-1.13253	AOL down vs VEH	0.103879	1	0.514474	1.13781	1.13781	HAL up vs VEH	0.758724	1	0.999992	1.02426	1.02426	OLZ up vs VEH	0.933049	1	0.999678	0.993125	-1.00692	PCP+OLZ down vs PCP	0.661436	1	0.999419	0.965198	-1.03606	PCP down vs VEH
41566_at	TCF15	transcription factor 15 (basic helix-loop-helix)	NM_004609	0.108019	1	0.741184	0.623518	1	0.999954	0.967028	-1.0341	AHA down vs VEH	0.0289494	1	0.81859	0.852895	-1.17248	AOL down vs VEH	0.545139	1	0.658586	1.04223	1.04223	HAL up vs VEH	0.776839	1	0.999992	0.980847	-1.01953	OLZ down vs VEH	0.370757	1	0.999678	1.06674	1.06674	PCP+OLZ up vs PCP	0.0883881	1	0.999419	0.884516	-1.13056	PCP down vs VEH
37372_at	SMPD1	sphingomyelin phosphodiesterase 1, acid lysosomal	NM_000543 /// NM_001007593 /// NR_027400	0.108179	1	0.741184	0.412805	1	0.999954	1.04409	1.04409	AHA up vs VEH	0.300464	1	0.81859	0.944989	-1.05821	AOL down vs VEH	0.181913	1	0.514474	1.07341	1.07341	HAL up vs VEH	0.765972	1	0.999992	1.01574	1.01574	OLZ up vs VEH	0.18052	1	0.999678	1.0777	1.0777	PCP+OLZ up vs PCP	0.122503	1	0.999419	0.918298	-1.08897	PCP down vs VEH
37294_at	BTG1	B-cell translocation gene 1, anti-proliferative	NM_001731	0.108201	1	0.741184	0.718101	1	0.999954	1.02406	1.02406	AHA up vs VEH	0.242811	1	0.81859	0.922904	-1.08354	AOL down vs VEH	0.181964	1	0.514474	1.09294	1.09294	HAL up vs VEH	0.545878	1	0.999992	0.96095	-1.04064	OLZ down vs VEH	0.437885	1	0.999678	1.05544	1.05544	PCP+OLZ up vs PCP	0.133901	1	0.999419	0.901506	-1.10925	PCP down vs VEH
38375_at	ESD	esterase D/formylglutathione hydrolase	NM_001984	0.108215	1	0.741184	0.681201	1	0.999954	0.971367	-1.02948	AHA down vs VEH	0.229748	1	0.81859	0.915198	-1.09266	AOL down vs VEH	0.407868	1	0.576623	1.06049	1.06049	HAL up vs VEH	0.419708	1	0.999992	1.05891	1.05891	OLZ up vs VEH	0.912327	1	0.999678	0.991845	-1.00822	PCP+OLZ down vs PCP	0.204276	1	0.999419	0.910394	-1.09843	PCP down vs VEH
37341_at	GLUD1	glutamate dehydrogenase 1	NM_005271	0.108678	1	0.741184	0.855694	1	0.999954	1.01147	1.01147	AHA up vs VEH	0.596549	1	0.854485	0.966183	-1.035	AOL down vs VEH	0.102361	1	0.514474	1.10989	1.10989	HAL up vs VEH	0.933548	1	0.999992	0.994786	-1.00524	OLZ down vs VEH	0.406349	1	0.999678	0.946425	-1.05661	PCP+OLZ down vs PCP	0.565416	1	0.999419	0.963281	-1.03812	PCP down vs VEH
114_r_at	MAPT	microtubule-associated protein tau	NM_001123066 /// NM_001123067 /// NM_005910 /// NM_016834 /// NM_016835 /// NM_0	0.108821	1	0.741184	0.669754	1	0.999954	0.970237	-1.03068	AHA down vs VEH	0.072574	1	0.81859	0.874315	-1.14375	AOL down vs VEH	0.865108	1	0.895593	1.0121	1.0121	HAL up vs VEH	0.527964	1	0.999992	0.956211	-1.04579	OLZ down vs VEH	0.0164264	1	0.999678	1.2042	1.2042	PCP+OLZ up vs PCP	0.0279312	1	0.999419	0.846682	-1.18108	PCP down vs VEH
31853_at	EED	embryonic ectoderm development	NM_003797 /// NM_152991	0.109231	1	0.741184	0.450382	1	0.999954	0.950617	-1.05195	AHA down vs VEH	0.00972132	1	0.81859	0.829395	-1.2057	AOL down vs VEH	0.847105	1	0.881695	1.01297	1.01297	HAL up vs VEH	0.404112	1	0.999992	0.945514	-1.05763	OLZ down vs VEH	0.390871	1	0.999678	1.06256	1.06256	PCP+OLZ up vs PCP	0.105501	1	0.999419	0.892211	-1.12081	PCP down vs VEH
1823_g_at	RET	ret proto-oncogene	NM_020630 /// NM_020975	0.109334	1	0.741184	0.858092	1	0.999954	1.01266	1.01266	AHA up vs VEH	0.0865607	1	0.81859	0.880594	-1.1356	AOL down vs VEH	0.272506	1	0.525108	1.08089	1.08089	HAL up vs VEH	0.896513	1	0.999992	1.00919	1.00919	OLZ up vs VEH	0.443552	1	0.999678	1.0586	1.0586	PCP+OLZ up vs PCP	0.155862	1	0.999419	0.900541	-1.11044	PCP down vs VEH
558_at	KRT1	keratin 1	NM_006121	0.109413	1	0.741184	0.619313	1	0.999954	1.03131	1.03131	AHA up vs VEH	0.20009	1	0.81859	0.920336	-1.08656	AOL down vs VEH	0.101566	1	0.514474	1.10877	1.10877	HAL up vs VEH	0.542612	1	0.999992	0.962898	-1.03853	OLZ down vs VEH	0.681377	1	0.999678	1.02717	1.02717	PCP+OLZ up vs PCP	0.416714	1	0.999419	0.949012	-1.05373	PCP down vs VEH
2055_s_at	ITGB1	integrin, beta 1 (fibronectin receptor, beta polypeptide, antigen CD29 includes	NM_002211 /// NM_033666 /// NM_033667 /// NM_033668 /// NM_033669 /// NM_133376	0.10944	1	0.741184	0.954986	1	0.999954	1.00379	1.00379	AHA up vs VEH	0.588529	1	0.852671	0.963107	-1.03831	AOL down vs VEH	0.0250297	1	0.514474	1.1681	1.1681	HAL up vs VEH	0.835025	1	0.999992	1.01406	1.01406	OLZ up vs VEH	0.718186	1	0.999678	1.02582	1.02582	PCP+OLZ up vs PCP	0.615512	1	0.999419	0.965675	-1.03554	PCP down vs VEH
36663_at	NPPA	natriuretic peptide precursor A	NM_006172	0.109463	1	0.741184	0.849319	1	0.999954	0.987575	-1.01258	AHA down vs VEH	0.110205	1	0.81859	0.895302	-1.11694	AOL down vs VEH	0.226508	1	0.516024	1.08367	1.08367	HAL up vs VEH	0.984591	1	0.999992	1.00127	1.00127	OLZ up vs VEH	0.909756	1	0.999678	1.00788	1.00788	PCP+OLZ up vs PCP	0.223865	1	0.999419	0.919701	-1.08731	PCP down vs VEH
36615_at	MANF	mesencephalic astrocyte-derived neurotrophic factor	NM_006010	0.109591	1	0.741184	0.929265	1	0.999954	1.00498	1.00498	AHA up vs VEH	0.385836	1	0.819966	0.950837	-1.0517	AOL down vs VEH	0.138501	1	0.514474	1.08768	1.08768	HAL up vs VEH	0.826637	1	0.999992	1.01232	1.01232	OLZ up vs VEH	0.174693	1	0.999678	1.08424	1.08424	PCP+OLZ up vs PCP	0.0903359	1	0.999419	0.90486	-1.10514	PCP down vs VEH
857_at	PPM1A	protein phosphatase 1A (formerly 2C), magnesium-dependent, alpha isoform	NM_021003 /// NM_177951 /// NM_177952	0.109779	1	0.741184	0.558421	1	0.999954	0.960492	-1.04113	AHA down vs VEH	0.0695952	1	0.81859	0.876432	-1.14099	AOL down vs VEH	0.225612	1	0.51598	1.08774	1.08774	HAL up vs VEH	0.699211	1	0.999992	0.973769	-1.02694	OLZ down vs VEH	0.886064	1	0.999678	0.989684	-1.01042	PCP+OLZ down vs PCP	0.346998	1	0.999419	0.934879	-1.06966	PCP down vs VEH
1660_at	UBE2N	ubiquitin-conjugating enzyme E2N (UBC13 homolog, yeast)	NM_003348	0.109787	1	0.741184	0.589753	1	0.999954	1.0311	1.0311	AHA up vs VEH	0.89733	1	0.962514	0.99246	-1.0076	AOL down vs VEH	0.0373592	1	0.514474	1.12919	1.12919	HAL up vs VEH	0.787221	1	0.999992	1.01543	1.01543	OLZ up vs VEH	0.186877	1	0.999678	1.08296	1.08296	PCP+OLZ up vs PCP	0.240157	1	0.999419	0.932762	-1.07208	PCP down vs VEH
106_at	RUNX3	runt-related transcription factor 3	NM_001031680 /// NM_004350	0.109808	1	0.741184	0.594938	1	0.999954	1.0372	1.0372	AHA up vs VEH	0.199339	1	0.81859	0.912069	-1.09641	AOL down vs VEH	0.131539	1	0.514474	1.11068	1.11068	HAL up vs VEH	0.585295	1	0.999992	1.0382	1.0382	OLZ up vs VEH	0.829007	1	0.999678	1.01572	1.01572	PCP+OLZ up vs PCP	0.367509	1	0.999419	0.937689	-1.06645	PCP down vs VEH
1519_at	ETS2	v-ets erythroblastosis virus E26 oncogene homolog 2 (avian)	NM_005239	0.109983	1	0.741184	0.967788	1	0.999954	0.997111	-1.0029	AHA down vs VEH	0.247194	1	0.81859	0.917101	-1.09039	AOL down vs VEH	0.101856	1	0.514474	1.12672	1.12672	HAL up vs VEH	0.889375	1	0.999992	1.01002	1.01002	OLZ up vs VEH	0.106264	1	0.999678	1.13198	1.13198	PCP+OLZ up vs PCP	0.184952	1	0.999419	0.905267	-1.10465	PCP down vs VEH
36148_at	APLP1	amyloid beta (A4) precursor-like protein 1	NM_001024807 /// NM_005166	0.110008	1	0.741184	0.884312	1	0.999954	1.00812	1.00812	AHA up vs VEH	0.048209	1	0.81859	0.889975	-1.12363	AOL down vs VEH	0.308254	1	0.536392	1.05866	1.05866	HAL up vs VEH	0.827781	1	0.999992	1.01216	1.01216	OLZ up vs VEH	0.158603	1	0.999678	1.08716	1.08716	PCP+OLZ up vs PCP	0.37008	1	0.999419	0.949467	-1.05322	PCP down vs VEH
33913_at	BAT2	HLA-B associated transcript 2	NM_080686	0.110086	1	0.741184	0.502424	1	0.999954	1.03458	1.03458	AHA up vs VEH	0.415775	1	0.819966	0.958168	-1.04366	AOL down vs VEH	0.0817478	1	0.514474	1.09391	1.09391	HAL up vs VEH	0.885108	1	0.999992	1.00733	1.00733	OLZ up vs VEH	0.0781255	1	0.999678	1.10042	1.10042	PCP+OLZ up vs PCP	0.196011	1	0.999419	0.933855	-1.07083	PCP down vs VEH
1189_at	CDK8	cyclin-dependent kinase 8	NM_001260	0.110113	1	0.741184	0.739322	1	0.999954	0.981018	-1.01935	AHA down vs VEH	0.164566	1	0.81859	0.919588	-1.08744	AOL down vs VEH	0.289858	1	0.530974	1.06329	1.06329	HAL up vs VEH	0.429045	1	0.999992	0.955326	-1.04676	OLZ down vs VEH	0.212913	1	0.999678	1.07924	1.07924	PCP+OLZ up vs PCP	0.0551813	1	0.999419	0.889454	-1.12429	PCP down vs VEH
37182_at	SYP	synaptophysin	NM_003179	0.110208	1	0.741184	0.865801	1	0.999954	0.989241	-1.01088	AHA down vs VEH	0.0200619	1	0.81859	0.852434	-1.17311	AOL down vs VEH	0.784866	1	0.83356	1.01763	1.01763	HAL up vs VEH	0.454107	1	0.999992	0.953051	-1.04926	OLZ down vs VEH	0.110978	1	0.999678	1.11542	1.11542	PCP+OLZ up vs PCP	0.191117	1	0.999419	0.916082	-1.0916	PCP down vs VEH
35460_at	GPR4	G protein-coupled receptor 4	NM_005282	0.110291	1	0.741184	0.400119	1	0.999954	1.05511	1.05511	AHA up vs VEH	0.555488	1	0.838488	0.961951	-1.03955	AOL down vs VEH	0.283003	1	0.528458	1.07106	1.07106	HAL up vs VEH	0.634092	1	0.999992	0.970205	-1.03071	OLZ down vs VEH	0.0169185	1	0.999678	0.847205	-1.18035	PCP+OLZ down vs PCP	0.0791843	1	0.999419	1.12499	1.12499	PCP up vs VEH
36585_at	ARF4	ADP-ribosylation factor 4	NM_001660	0.110364	1	0.741184	0.473325	1	0.999954	1.04818	1.04818	AHA up vs VEH	0.521766	1	0.828277	0.957469	-1.04442	AOL down vs VEH	0.0729121	1	0.514474	1.12731	1.12731	HAL up vs VEH	0.927659	1	0.999992	1.00596	1.00596	OLZ up vs VEH	0.432172	1	0.999678	1.05581	1.05581	PCP+OLZ up vs PCP	0.235479	1	0.999419	0.922087	-1.0845	PCP down vs VEH
35792_at	MGLL	monoglyceride lipase	NM_001003794 /// NM_007283	0.110387	1	0.741184	0.485226	1	0.999954	1.04699	1.04699	AHA up vs VEH	0.773054	1	0.912991	1.01977	1.01977	AOL up vs VEH	0.0133292	1	0.514474	1.1843	1.1843	HAL up vs VEH	0.0763444	1	0.999992	1.12604	1.12604	OLZ up vs VEH	0.443896	1	0.999678	0.948311	-1.05451	PCP+OLZ down vs PCP	0.411134	1	0.999419	1.05768	1.05768	PCP up vs VEH
33472_at	FMO4	flavin containing monooxygenase 4	NM_002022	0.110723	1	0.741184	0.09988	1	0.999954	1.10676	1.10676	AHA up vs VEH	0.799146	1	0.92188	0.984182	-1.01607	AOL down vs VEH	0.0431323	1	0.514474	1.13411	1.13411	HAL up vs VEH	0.995687	1	0.999992	0.999673	-1.00033	OLZ down vs VEH	0.8181	1	0.999678	0.985442	-1.01477	PCP+OLZ down vs PCP	0.97312	1	0.999419	1.00212	1.00212	PCP up vs VEH
1420_s_at	EIF4A2	eukaryotic translation initiation factor 4A, isoform 2	NM_001967	0.110755	1	0.741184	0.692801	1	0.999954	0.974785	-1.02587	AHA down vs VEH	0.200851	1	0.81859	0.917228	-1.09024	AOL down vs VEH	0.24197	1	0.516024	1.07924	1.07924	HAL up vs VEH	0.628992	1	0.999992	1.03174	1.03174	OLZ up vs VEH	0.366144	1	0.999678	1.06373	1.06373	PCP+OLZ up vs PCP	0.107594	1	0.999419	0.896275	-1.11573	PCP down vs VEH
34332_at	GNPDA1	glucosamine-6-phosphate deaminase 1	NM_005471	0.110955	1	0.741184	0.576012	1	0.999954	0.967	-1.03413	AHA down vs VEH	0.0598077	1	0.81859	0.887442	-1.12683	AOL down vs VEH	0.601294	1	0.693963	1.03184	1.03184	HAL up vs VEH	0.391	1	0.999992	0.94969	-1.05298	OLZ down vs VEH	0.979492	1	0.999678	0.998381	-1.00162	PCP+OLZ down vs PCP	0.0897103	1	0.999419	0.898259	-1.11327	PCP down vs VEH
40198_at	VDAC1	voltage-dependent anion channel 1	NM_003374	0.110981	1	0.741184	0.850854	1	0.999954	0.988673	-1.01146	AHA down vs VEH	0.192766	1	0.81859	0.920771	-1.08605	AOL down vs VEH	0.139967	1	0.514474	1.09494	1.09494	HAL up vs VEH	0.314678	1	0.999992	1.06323	1.06323	OLZ up vs VEH	0.505051	1	0.999678	1.04355	1.04355	PCP+OLZ up vs PCP	0.358559	1	0.999419	0.943725	-1.05963	PCP down vs VEH
36490_s_at	PRPS1	phosphoribosyl pyrophosphate synthetase 1	NM_002764	0.111298	1	0.741184	0.512966	1	0.999954	1.04293	1.04293	AHA up vs VEH	0.321607	1	0.81859	0.936007	-1.06837	AOL down vs VEH	0.0375992	1	0.514474	1.14699	1.14699	HAL up vs VEH	0.617784	1	0.999992	1.03254	1.03254	OLZ up vs VEH	0.415011	1	0.999678	1.05678	1.05678	PCP+OLZ up vs PCP	0.58949	1	0.999419	0.96476	-1.03653	PCP down vs VEH
1214_s_at	IFNB1	interferon, beta 1, fibroblast	NM_002176	0.111314	1	0.741184	0.515241	1	0.999954	1.04837	1.04837	AHA up vs VEH	0.240986	1	0.81859	0.915185	-1.09268	AOL down vs VEH	0.125759	1	0.514474	1.11917	1.11917	HAL up vs VEH	0.987706	1	0.999992	1.00112	1.00112	OLZ up vs VEH	0.611364	1	0.999678	0.961947	-1.03956	PCP+OLZ down vs PCP	0.594007	1	0.999419	0.960747	-1.04086	PCP down vs VEH
2083_at	CCKBR	cholecystokinin B receptor	NM_176875	0.111445	1	0.741184	0.963761	1	0.999954	0.997068	-1.00294	AHA down vs VEH	0.0637721	1	0.81859	0.880874	-1.13524	AOL down vs VEH	0.301355	1	0.533713	1.06959	1.06959	HAL up vs VEH	0.995367	1	0.999992	0.999625	-1.00038	OLZ down vs VEH	0.151151	1	0.999678	1.1041	1.1041	PCP+OLZ up vs PCP	0.139503	1	0.999419	0.904504	-1.10558	PCP down vs VEH
33409_at	FKBP2	FK506 binding protein 2, 13kDa	NM_001135208 /// NM_004470 /// NM_057092	0.1115	1	0.741184	0.409686	1	0.999954	1.04165	1.04165	AHA up vs VEH	0.317656	1	0.81859	0.950015	-1.05261	AOL down vs VEH	0.111259	1	0.514474	1.08308	1.08308	HAL up vs VEH	0.657445	1	0.999992	1.02212	1.02212	OLZ up vs VEH	0.719688	1	0.999678	1.01881	1.01881	PCP+OLZ up vs PCP	0.327785	1	0.999419	0.950984	-1.05154	PCP down vs VEH
37190_at	WASF1	WAS protein family, member 1	NM_001024934 /// NM_001024935 /// NM_001024936 /// NM_003931	0.111509	1	0.741184	0.855324	1	0.999954	1.01025	1.01025	AHA up vs VEH	0.314205	1	0.81859	0.943061	-1.06038	AOL down vs VEH	0.0624127	1	0.514474	1.11255	1.11255	HAL up vs VEH	0.770129	1	0.999992	1.01648	1.01648	OLZ up vs VEH	0.519946	1	0.999678	1.03872	1.03872	PCP+OLZ up vs PCP	0.330478	1	0.999419	0.944855	-1.05836	PCP down vs VEH
32165_at	SFRS7	splicing factor, arginine/serine-rich 7, 35kDa	NM_001031684	0.111602	1	0.741184	0.530057	1	0.999954	0.958847	-1.04292	AHA down vs VEH	0.167115	1	0.81859	0.90789	-1.10145	AOL down vs VEH	0.29151	1	0.531883	1.07351	1.07351	HAL up vs VEH	0.81483	1	0.999992	1.01576	1.01576	OLZ up vs VEH	0.467172	1	0.999678	0.950014	-1.05262	PCP+OLZ down vs PCP	0.394108	1	0.999419	0.942515	-1.06099	PCP down vs VEH
33475_at	PKP4	plakophilin 4	NM_001005476 /// NM_003628	0.111637	1	0.741184	0.292773	1	0.999954	1.05761	1.05761	AHA up vs VEH	0.271627	1	0.81859	0.941205	-1.06247	AOL down vs VEH	0.12601	1	0.514474	1.0856	1.0856	HAL up vs VEH	0.805045	1	0.999992	0.987035	-1.01314	OLZ down vs VEH	0.470682	1	0.999678	0.960522	-1.0411	PCP+OLZ down vs PCP	0.897186	1	0.999419	0.992951	-1.0071	PCP down vs VEH
34632_r_at	GP5	glycoprotein V (platelet)	NM_004488	0.111637	1	0.741184	0.0408612	1	0.999954	1.13118	1.13118	AHA up vs VEH	0.370438	1	0.81859	1.05612	1.05612	AOL up vs VEH	0.173386	1	0.514474	1.08413	1.08413	HAL up vs VEH	0.538704	1	0.999992	0.964524	-1.03678	OLZ down vs VEH	0.245185	1	0.999678	0.9302	-1.07504	PCP+OLZ down vs PCP	0.1937	1	0.999419	1.08306	1.08306	PCP up vs VEH
1899_s_at	RAD52	RAD52 homolog (S. cerevisiae)	NM_134424	0.11181	1	0.741184	0.784535	1	0.999954	1.01673	1.01673	AHA up vs VEH	0.452671	1	0.820158	0.953793	-1.04845	AOL down vs VEH	0.0426023	1	0.514474	1.13478	1.13478	HAL up vs VEH	0.782081	1	0.999992	1.01693	1.01693	OLZ up vs VEH	0.679297	1	0.999678	0.973912	-1.02679	PCP+OLZ down vs PCP	0.764804	1	0.999419	0.981367	-1.01899	PCP down vs VEH
1323_at	UBB	ubiquitin B	NM_018955	0.111811	1	0.741184	0.730046	1	0.999954	0.976524	-1.02404	AHA down vs VEH	0.0950545	1	0.81859	0.885995	-1.12867	AOL down vs VEH	0.141342	1	0.514474	1.10811	1.10811	HAL up vs VEH	0.657971	1	0.999992	0.969965	-1.03096	OLZ down vs VEH	0.716664	1	0.999678	0.974035	-1.02666	PCP+OLZ down vs PCP	0.632157	1	0.999419	0.966417	-1.03475	PCP down vs VEH
39262_at	SAC3D1	SAC3 domain containing 1	NM_013299	0.111903	1	0.741184	0.963328	1	0.999954	0.997547	-1.00246	AHA down vs VEH	0.0567565	1	0.81859	0.897747	-1.1139	AOL down vs VEH	0.224145	1	0.515518	1.06776	1.06776	HAL up vs VEH	0.751868	1	0.999992	0.983244	-1.01704	OLZ down vs VEH	0.503004	1	0.999678	1.0385	1.0385	PCP+OLZ up vs PCP	0.259584	1	0.999419	0.939041	-1.06492	PCP down vs VEH
2046_at	ERG	v-ets erythroblastosis virus E26 oncogene homolog (avian)	NM_001136154 /// NM_001136155 /// NM_004449 /// NM_182918	0.111909	1	0.741184	0.280834	1	0.999954	1.05887	1.05887	AHA up vs VEH	0.815307	1	0.92787	0.987356	-1.01281	AOL down vs VEH	0.0280257	1	0.514474	1.12688	1.12688	HAL up vs VEH	0.705836	1	0.999992	1.02009	1.02009	OLZ up vs VEH	0.640479	1	0.999678	1.02626	1.02626	PCP+OLZ up vs PCP	0.550245	1	0.999419	0.967882	-1.03318	PCP down vs VEH
38707_r_at	E2F4	E2F transcription factor 4, p107/p130-binding	NM_001950	0.112256	1	0.741184	0.809397	1	0.999954	0.986737	-1.01344	AHA down vs VEH	0.407876	1	0.819966	0.953518	-1.04875	AOL down vs VEH	0.144174	1	0.514474	1.08542	1.08542	HAL up vs VEH	0.829809	1	0.999992	0.988173	-1.01197	OLZ down vs VEH	0.180534	1	0.999678	1.08215	1.08215	PCP+OLZ up vs PCP	0.0786935	1	0.999419	0.902235	-1.10836	PCP down vs VEH
36393_at	DPF1	D4, zinc and double PHD fingers family 1	NM_001135155 /// NM_001135156 /// NM_004647	0.112318	1	0.741184	0.406956	1	0.999954	1.04501	1.04501	AHA up vs VEH	0.149477	1	0.81859	0.923204	-1.08318	AOL down vs VEH	0.287985	1	0.53051	1.05821	1.05821	HAL up vs VEH	0.766524	1	0.999992	1.01582	1.01582	OLZ up vs VEH	0.292854	1	0.999678	1.06073	1.06073	PCP+OLZ up vs PCP	0.158045	1	0.999419	0.924685	-1.08145	PCP down vs VEH
32599_at	TSC1	tuberous sclerosis 1	NM_000368 /// NM_001008567 /// NM_001162426 /// NM_001162427	0.112351	1	0.741184	0.220687	1	0.999954	1.08614	1.08614	AHA up vs VEH	0.347135	1	0.81859	0.936735	-1.06754	AOL down vs VEH	0.0410825	1	0.514474	1.15064	1.15064	HAL up vs VEH	0.217341	1	0.999992	1.08681	1.08681	OLZ up vs VEH	0.533921	1	0.999678	0.95709	-1.04483	PCP+OLZ down vs PCP	0.386255	1	0.999419	1.0621	1.0621	PCP up vs VEH
41140_at	IFNGR2	interferon gamma receptor 2 (interferon gamma transducer 1)	NM_005534	0.112351	1	0.741184	0.226183	1	0.999954	1.06968	1.06968	AHA up vs VEH	0.865622	1	0.950313	0.990396	-1.0097	AOL down vs VEH	0.0274108	1	0.514474	1.13383	1.13383	HAL up vs VEH	0.345174	1	0.999992	1.05373	1.05373	OLZ up vs VEH	0.397009	1	0.999678	1.05062	1.05062	PCP+OLZ up vs PCP	0.509673	1	0.999419	0.962957	-1.03847	PCP down vs VEH
1060_g_at	NTRK3	neurotrophic tyrosine kinase, receptor, type 3	NM_001007156 /// NM_001012338 /// NM_002530	0.112498	1	0.741184	0.71629	1	0.999954	1.02186	1.02186	AHA up vs VEH	0.205544	1	0.81859	0.924321	-1.08187	AOL down vs VEH	0.0887046	1	0.514474	1.10869	1.10869	HAL up vs VEH	0.775326	1	0.999992	1.01712	1.01712	OLZ up vs VEH	0.270055	1	0.999678	0.932773	-1.07207	PCP+OLZ down vs PCP	0.773983	1	0.999419	1.01785	1.01785	PCP up vs VEH
1074_at	RAB1A	RAB1A, member RAS oncogene family	NM_004161 /// NM_015543	0.112664	1	0.741184	0.904063	1	0.999954	0.992768	-1.00728	AHA down vs VEH	0.932654	1	0.973797	0.994749	-1.00528	AOL down vs VEH	0.19427	1	0.514474	1.08226	1.08226	HAL up vs VEH	0.930924	1	0.999992	1.00523	1.00523	OLZ up vs VEH	0.0147206	1	0.999678	1.17464	1.17464	PCP+OLZ up vs PCP	0.0553589	1	0.999419	0.884725	-1.1303	PCP down vs VEH
37542_at	LHFPL2	lipoma HMGIC fusion partner-like 2	NM_005779	0.112768	1	0.741184	0.547835	1	0.999954	1.03786	1.03786	AHA up vs VEH	0.761217	1	0.910812	0.980784	-1.01959	AOL down vs VEH	0.0975507	1	0.514474	1.1097	1.1097	HAL up vs VEH	0.393073	1	0.999992	0.948443	-1.05436	OLZ down vs VEH	0.209384	1	0.999678	0.920927	-1.08586	PCP+OLZ down vs PCP	0.853444	1	0.999419	1.01187	1.01187	PCP up vs VEH
1032_at	IL8RB	interleukin 8 receptor, beta	NM_001557	0.112843	1	0.741184	0.206503	1	0.999954	1.07836	1.07836	AHA up vs VEH	0.902965	1	0.963186	0.992574	-1.00748	AOL down vs VEH	0.0399281	1	0.514474	1.13301	1.13301	HAL up vs VEH	0.242678	1	0.999992	1.07215	1.07215	OLZ up vs VEH	0.69742	1	0.999678	1.02451	1.02451	PCP+OLZ up vs PCP	0.572019	1	0.999419	0.965938	-1.03526	PCP down vs VEH
39404_s_at	UPF1	UPF1 regulator of nonsense transcripts homolog (yeast)	NM_002911	0.112866	1	0.741184	0.92043	1	0.999954	1.0061	1.0061	AHA up vs VEH	0.12177	1	0.81859	0.905732	-1.10408	AOL down vs VEH	0.22694	1	0.516024	1.07709	1.07709	HAL up vs VEH	0.631446	1	0.999992	1.02967	1.02967	OLZ up vs VEH	0.523203	1	0.999678	1.04187	1.04187	PCP+OLZ up vs PCP	0.196734	1	0.999419	0.921004	-1.08577	PCP down vs VEH
37701_at	RGS2	regulator of G-protein signaling 2, 24kDa	NM_002923	0.112907	1	0.741184	0.678923	1	0.999954	1.03272	1.03272	AHA up vs VEH	0.0612407	1	0.81859	0.857257	-1.16651	AOL down vs VEH	0.344575	1	0.552409	1.07666	1.07666	HAL up vs VEH	0.663882	1	0.999992	1.03438	1.03438	OLZ up vs VEH	0.738952	1	0.999678	0.973091	-1.02765	PCP+OLZ down vs PCP	0.542414	1	0.999419	0.95205	-1.05037	PCP down vs VEH
38081_at	LTA4H	leukotriene A4 hydrolase	NM_000895	0.112998	1	0.741184	0.822492	1	0.999954	1.01411	1.01411	AHA up vs VEH	0.059851	1	0.81859	0.882969	-1.13254	AOL down vs VEH	0.26437	1	0.523083	1.07279	1.07279	HAL up vs VEH	0.783149	1	0.999992	0.982957	-1.01734	OLZ down vs VEH	0.764901	1	0.999678	0.980525	-1.01986	PCP+OLZ down vs PCP	0.476996	1	0.999419	0.954911	-1.04722	PCP down vs VEH
37159_at	AHDC1	AT hook, DNA binding motif, containing 1	NM_001029882	0.113014	1	0.741184	0.401985	1	0.999954	1.04644	1.04644	AHA up vs VEH	0.190014	1	0.81859	0.928734	-1.07673	AOL down vs VEH	0.106032	1	0.514474	1.09271	1.09271	HAL up vs VEH	0.255004	1	0.999992	1.06385	1.06385	OLZ up vs VEH	0.993801	1	0.999678	0.999559	-1.00044	PCP+OLZ down vs PCP	0.856388	1	0.999419	0.989944	-1.01016	PCP down vs VEH
37046_at	PSMA5	proteasome (prosome, macropain) subunit, alpha type, 5	NM_002790	0.113164	1	0.741184	0.967796	1	0.999954	1.00222	1.00222	AHA up vs VEH	0.226511	1	0.81859	0.932862	-1.07197	AOL down vs VEH	0.0449337	1	0.514474	1.11999	1.11999	HAL up vs VEH	0.852688	1	0.999992	1.01027	1.01027	OLZ up vs VEH	0.781539	1	0.999678	1.0162	1.0162	PCP+OLZ up vs PCP	0.760978	1	0.999419	0.982808	-1.01749	PCP down vs VEH
38068_at	AMFR	autocrine motility factor receptor	NM_001144	0.113244	1	0.741184	0.693077	1	0.999954	1.02299	1.02299	AHA up vs VEH	0.239753	1	0.81859	0.93181	-1.07318	AOL down vs VEH	0.0687897	1	0.514474	1.11299	1.11299	HAL up vs VEH	0.271044	1	0.999992	1.06592	1.06592	OLZ up vs VEH	0.643646	1	0.999678	1.02846	1.02846	PCP+OLZ up vs PCP	0.657176	1	0.999419	0.973865	-1.02684	PCP down vs VEH
826_at	DDX3X	DEAD (Asp-Glu-Ala-Asp) box polypeptide 3, X-linked	NM_001356	0.113451	1	0.741184	0.224885	1	0.999954	0.926149	-1.07974	AHA down vs VEH	0.115362	1	0.81859	0.901519	-1.10924	AOL down vs VEH	0.615491	1	0.703514	1.03199	1.03199	HAL up vs VEH	0.13666	1	0.999992	0.909778	-1.09917	OLZ down vs VEH	0.0744394	1	0.999678	1.12761	1.12761	PCP+OLZ up vs PCP	0.0467281	1	0.999419	0.875985	-1.14157	PCP down vs VEH
41505_r_at	MAF	v-maf musculoaponeurotic fibrosarcoma oncogene homolog (avian)	NM_001031804 /// NM_005360	0.113557	1	0.741184	0.869369	1	0.999954	1.01041	1.01041	AHA up vs VEH	0.205305	1	0.81859	0.91998	-1.08698	AOL down vs VEH	0.16239	1	0.514474	1.09322	1.09322	HAL up vs VEH	0.912866	1	0.999992	1.00691	1.00691	OLZ up vs VEH	0.692785	1	0.999678	1.02657	1.02657	PCP+OLZ up vs PCP	0.199137	1	0.999419	0.918814	-1.08836	PCP down vs VEH
40611_s_at	ZFR	Zinc finger RNA binding protein	NM_016107	0.113649	1	0.741184	0.776135	1	0.999954	1.02013	1.02013	AHA up vs VEH	0.300165	1	0.81859	0.927172	-1.07855	AOL down vs VEH	0.148969	1	0.514474	1.10794	1.10794	HAL up vs VEH	0.986544	1	0.999992	1.00118	1.00118	OLZ up vs VEH	0.253596	1	0.999678	1.08863	1.08863	PCP+OLZ up vs PCP	0.110772	1	0.999419	0.888986	-1.12488	PCP down vs VEH
34819_at	CD164	CD164 molecule, sialomucin	NM_001142401 /// NM_001142402 /// NM_001142403 /// NM_001142404 /// NM_006016	0.113695	1	0.741184	0.180506	1	0.999954	1.08556	1.08556	AHA up vs VEH	0.627234	1	0.862084	0.96998	-1.03095	AOL down vs VEH	0.0381262	1	0.514474	1.138	1.138	HAL up vs VEH	0.938593	1	0.999992	0.995344	-1.00468	OLZ down vs VEH	0.298853	1	0.999678	0.935447	-1.06901	PCP+OLZ down vs PCP	0.375452	1	0.999419	1.05749	1.05749	PCP up vs VEH
[truncated: 6,406 more rows]

## Sheet: Supplemental Table 2
Probeset ID	Gene Symbol	Gene Title	RefSeq Transcript ID	p-value(Treatment)	bonferroni(p-value(Treatment))	stepup(p-value(Treatment))	p-value(AHAL vs. VEH)	bonferroni(p-value(AHAL vs. VEH))	stepup(p-value(AHAL vs. VEH))	Ratio(AHAL vs. VEH)	Fold-Change(AHAL vs. VEH)	Fold-Change(AHAL vs. VEH) (Description)	p-value(AOLZ vs. VEH)	bonferroni(p-value(AOLZ vs. VEH))	stepup(p-value(AOLZ vs. VEH))	Ratio(AOLZ vs. VEH)	Fold-Change(AOLZ vs. VEH)	Fold-Change(AOLZ vs. VEH) (Description)	p-value(HAL vs. VEH)	bonferroni(p-value(HAL vs. VEH))	stepup(p-value(HAL vs. VEH))	Ratio(HAL vs. VEH)	Fold-Change(HAL vs. VEH)	Fold-Change(HAL vs. VEH) (Description)	p-value(OLANZ vs. VEH)	bonferroni(p-value(OLANZ vs. VEH))	stepup(p-value(OLANZ vs. VEH))	Ratio(OLANZ vs. VEH)	Fold-Change(OLANZ vs. VEH)	Fold-Change(OLANZ vs. VEH) (Description)	p-value(PCP vs. PCP+OLZ)	bonferroni(p-value(PCP vs. PCP+OLZ))	stepup(p-value(PCP vs. PCP+OLZ))	Ratio(PCP vs. PCP+OLZ)	Fold-Change(PCP vs. PCP+OLZ)	Fold-Change(PCP vs. PCP+OLZ) (Description)	p-value(PCP vs. VEH)	bonferroni(p-value(PCP vs. VEH))	stepup(p-value(PCP vs. VEH))	Ratio(PCP vs. VEH)	Fold-Change(PCP vs. VEH)	Fold-Change(PCP vs. VEH) (Description)
[truncated: 6,068 more rows]

[truncated: 4 more sheets: Supplemental Table 3, Supplemental Table 4, Supplementary Table 5, Supplementary Table 6]
